# Supplementary material
Source: Research Square preprint supplement (doi:10.21203/rs.3.rs-9032720/v1)
Supplement: Supplementary file 1 [file 87086b4a34e0b679d3c07024.xlsx]

## Sheet: Input
TXNAME	GENEID	GENESYMBOL	GENETYPE	TRANSCRIPTTYPE	CHROMOSOME
STRG.4.1	ENSG00000177133.14	PRDM16-DT	lncRNA	lncRNA	chr1
STRG.5.1	ENSG00000142611.17	PRDM16	protein_coding	protein_coding	chr1
STRG.5.3	ENSG00000142611.17	PRDM16	protein_coding	protein_coding	chr1
STRG.5.4	ENSG00000142611.17	PRDM16	protein_coding	protein_coding	chr1
STRG.5.5	ENSG00000142611.17	PRDM16	protein_coding	protein_coding	chr1
STRG.6.1	ENSG00000283572.1	MIR4251	miRNA	miRNA	chr1
STRG.7.1	ENSG00000279839.1	ENSG00000279839	TEC	TEC	chr1
STRG.8.1	ENSG00000272235.1	ENSG00000272235	lncRNA	lncRNA	chr1
STRG.9.1	ENSG00000287828.1	ENSG00000287828	lncRNA	lncRNA	chr1
STRG.10.2	ENSG00000130762.15	ARHGEF16	protein_coding	protein_coding	chr1
STRG.10.3	ENSG00000130762.15	ARHGEF16	protein_coding	protein_coding	chr1
STRG.11.1	ENSG00000272088.1	ENSG00000272088	lncRNA	lncRNA	chr1
STRG.14.1	ENSG00000207776.1	MIR551A	miRNA	miRNA	chr1
STRG.17.1	ENSG00000158109.15	TPRG1L	protein_coding	protein_coding	chr1
STRG.17.2	ENSG00000158109.15	TPRG1L	protein_coding	protein_coding	chr1
STRG.18.1	ENSG00000116213.16	WRAP73	protein_coding	protein_coding	chr1
STRG.18.2	ENSG00000116213.16	WRAP73	protein_coding	protein_coding	chr1
STRG.20.1	ENSG00000078900.15	TP73	protein_coding	protein_coding	chr1
STRG.20.2	ENSG00000078900.15	TP73	protein_coding	protein_coding	chr1
STRG.20.3	ENSG00000078900.15	TP73	protein_coding	protein_coding	chr1
STRG.20.4	ENSG00000078900.15	TP73	protein_coding	protein_coding	chr1
STRG.21.5	ENSG00000227372.12	TP73-AS1	transcribed_unitary_pseudogene	processed_transcript	chr1
STRG.23.1	ENSG00000235169.11	SMIM1	protein_coding	protein_coding	chr1
STRG.23.2	ENSG00000235169.11	SMIM1	protein_coding	protein_coding	chr1
STRG.23.3	ENSG00000235169.11	SMIM1	protein_coding	protein_coding	chr1
STRG.24.1	ENSG00000130764.10	LRRC47	protein_coding	protein_coding	chr1
STRG.25.1	ENSG00000266075.2	RN7SL574P	misc_RNA	misc_RNA	chr1
STRG.26.1	ENSG00000272153.1	ENSG00000272153	lncRNA	lncRNA	chr1
STRG.28.1	ENSG00000116198.14	CEP104	protein_coding	protein_coding	chr1
STRG.28.2	ENSG00000116198.14	CEP104	protein_coding	protein_coding	chr1
STRG.28.3	ENSG00000116198.14	CEP104	protein_coding	protein_coding	chr1
STRG.28.4	ENSG00000116198.14	CEP104	protein_coding	protein_coding	chr1
STRG.28.5	ENSG00000116198.14	CEP104	protein_coding	protein_coding	chr1
STRG.30.2	ENSG00000169598.17	DFFB	protein_coding	protein_coding	chr1
STRG.30.3	ENSG00000169598.17	DFFB	protein_coding	protein_coding	chr1
STRG.32.1	ENSG00000198912.12	C1orf174	protein_coding	protein_coding	chr1
STRG.32.2	ENSG00000198912.12	C1orf174	protein_coding	protein_coding	chr1
STRG.33.2	ENSG00000236423.8	LINC01134	lncRNA	lncRNA	chr1
STRG.37.1	ENSG00000278267.1	MIR6859-1	miRNA	miRNA	chr1
STRG.38.1	ENSG00000243485.5	MIR1302-2HG	lncRNA	lncRNA	chr1
STRG.38.2	ENSG00000284332.1	MIR1302-2	miRNA	miRNA	chr1
STRG.39.1	ENSG00000238009.6	ENSG00000238009	lncRNA	lncRNA	chr1
STRG.39.4	ENSG00000238009.6	ENSG00000238009	lncRNA	lncRNA	chr1
STRG.43.1	ENSG00000233750.3	CICP27	processed_pseudogene	processed_pseudogene	chr1
STRG.45.6	ENSG00000241860.7	ENSG00000241860	lncRNA	lncRNA	chr1
STRG.46.1	ENSG00000222623.1	RNU6-1100P	snRNA	snRNA	chr1
STRG.45.9	ENSG00000241860.7	ENSG00000241860	lncRNA	lncRNA	chr1
STRG.49.5	ENSG00000279457.4	WASH9P	unprocessed_pseudogene	unprocessed_pseudogene	chr1
STRG.50.1	ENSG00000228463.10	ENSG00000228463	transcribed_processed_pseudogene	processed_transcript	chr1
STRG.50.2	ENSG00000228463.10	ENSG00000228463	transcribed_processed_pseudogene	transcribed_processed_pseudogene	chr1
STRG.52.1	ENSG00000236679.2	RPL23AP24	processed_pseudogene	processed_pseudogene	chr1
STRG.55.1	ENSG00000269732.1	WBP1LP7	processed_pseudogene	processed_pseudogene	chr1
STRG.56.1	ENSG00000284733.2	OR4F29	protein_coding	protein_coding	chr1
STRG.57.3	ENSG00000237094.13	ENSG00000237094	transcribed_unprocessed_pseudogene	transcribed_unprocessed_pseudogene	chr1
STRG.58.3	ENSG00000290385.1	ENSG00000290385	lncRNA	lncRNA	chr1
STRG.58.4	ENSG00000290385.1	ENSG00000290385	lncRNA	lncRNA	chr1
STRG.58.5	ENSG00000290385.1	ENSG00000290385	lncRNA	lncRNA	chr1
STRG.58.6	ENSG00000290385.1	ENSG00000290385	lncRNA	lncRNA	chr1
STRG.58.7	ENSG00000290385.1	ENSG00000290385	lncRNA	lncRNA	chr1
STRG.58.8	ENSG00000290385.1	ENSG00000290385	lncRNA	lncRNA	chr1
STRG.58.9	ENSG00000290385.1	ENSG00000290385	lncRNA	lncRNA	chr1
STRG.58.10	ENSG00000290385.1	ENSG00000290385	lncRNA	lncRNA	chr1
STRG.60.1	ENSG00000278757.1	U6	snRNA	snRNA	chr1
STRG.65.1	ENSG00000225972.1	MTND1P23	unprocessed_pseudogene	unprocessed_pseudogene	chr1
STRG.66.1	ENSG00000225630.1	MTND2P28	unprocessed_pseudogene	unprocessed_pseudogene	chr1
STRG.67.1	ENSG00000237973.1	MTCO1P12	unprocessed_pseudogene	unprocessed_pseudogene	chr1
STRG.68.1	ENSG00000229344.1	MTCO2P12	unprocessed_pseudogene	unprocessed_pseudogene	chr1
STRG.70.1	ENSG00000240409.1	MTATP8P1	unprocessed_pseudogene	unprocessed_pseudogene	chr1
STRG.71.1	ENSG00000248527.1	MTATP6P1	unprocessed_pseudogene	unprocessed_pseudogene	chr1
STRG.72.1	ENSG00000198744.5	MTCO3P12	unprocessed_pseudogene	unprocessed_pseudogene	chr1
STRG.73.1	ENSG00000268663.1	WBP1LP6	processed_pseudogene	processed_pseudogene	chr1
STRG.74.1	ENSG00000284662.2	OR4F16	protein_coding	protein_coding	chr1
STRG.78.1	ENSG00000223181.1	RNU6-1199P	snRNA	snRNA	chr1
STRG.79.3	ENSG00000285268.1	ENSG00000285268	transcribed_processed_pseudogene	transcribed_processed_pseudogene	chr1
STRG.82.1	ENSG00000237491.10	LINC01409	lncRNA	lncRNA	chr1
STRG.83.1	ENSG00000230092.8	ENSG00000230092	transcribed_unprocessed_pseudogene	transcribed_unprocessed_pseudogene	chr1
STRG.83.7	ENSG00000225880.6	LINC00115	lncRNA	lncRNA	chr1
STRG.84.1	ENSG00000228794.12	LINC01128	lncRNA	lncRNA	chr1
STRG.84.2	ENSG00000228794.12	LINC01128	lncRNA	lncRNA	chr1
STRG.84.3	ENSG00000228794.12	LINC01128	lncRNA	lncRNA	chr1
STRG.84.4	ENSG00000228794.12	LINC01128	lncRNA	lncRNA	chr1
STRG.84.6	ENSG00000228794.12	LINC01128	lncRNA	lncRNA	chr1
STRG.91.1	ENSG00000187634.13	SAMD11	protein_coding	protein_coding	chr1
STRG.91.2	ENSG00000187634.13	SAMD11	protein_coding	protein_coding	chr1
STRG.91.4	ENSG00000187634.13	SAMD11	protein_coding	protein_coding	chr1
STRG.92.1	ENSG00000188976.11	NOC2L	protein_coding	protein_coding	chr1
STRG.93.1	ENSG00000187961.15	KLHL17	protein_coding	protein_coding	chr1
STRG.94.2	ENSG00000187583.11	PLEKHN1	protein_coding	protein_coding	chr1
STRG.100.1	ENSG00000272512.1	ENSG00000272512	lncRNA	lncRNA	chr1
STRG.101.2	ENSG00000188290.11	HES4	protein_coding	protein_coding	chr1
STRG.101.3	ENSG00000188290.11	HES4	protein_coding	protein_coding	chr1
STRG.101.4	ENSG00000188290.11	HES4	protein_coding	protein_coding	chr1
STRG.102.6	ENSG00000187608.10	ISG15	protein_coding	protein_coding	chr1
STRG.103.1	ENSG00000231702.2	ENSG00000231702	processed_pseudogene	processed_pseudogene	chr1
STRG.102.7	ENSG00000187608.10	ISG15	protein_coding	protein_coding	chr1
STRG.104.1	ENSG00000188157.15	AGRN	protein_coding	protein_coding	chr1
STRG.107.1	ENSG00000131591.18	C1orf159	protein_coding	protein_coding	chr1
STRG.107.4	ENSG00000131591.18	C1orf159	protein_coding	protein_coding	chr1
STRG.107.6	ENSG00000131591.18	C1orf159	protein_coding	protein_coding	chr1
STRG.108.1	ENSG00000285812.1	ENSG00000285812	lncRNA	lncRNA	chr1
STRG.113.1	ENSG00000078808.20	SDF4	protein_coding	protein_coding	chr1
STRG.113.2	ENSG00000078808.20	SDF4	protein_coding	protein_coding	chr1
STRG.114.1	ENSG00000176022.7	B3GALT6	protein_coding	protein_coding	chr1
STRG.117.1	ENSG00000260179.1	ENSG00000260179	lncRNA	lncRNA	chr1
STRG.119.1	ENSG00000160087.21	UBE2J2	protein_coding	protein_coding	chr1
STRG.119.2	ENSG00000160087.21	UBE2J2	protein_coding	protein_coding	chr1
STRG.119.3	ENSG00000160087.21	UBE2J2	protein_coding	protein_coding	chr1
STRG.119.4	ENSG00000160087.21	UBE2J2	protein_coding	protein_coding	chr1
STRG.119.5	ENSG00000160087.21	UBE2J2	protein_coding	protein_coding	chr1
STRG.120.3	ENSG00000230415.1	LINC01786	lncRNA	lncRNA	chr1
STRG.120.4	ENSG00000230415.1	LINC01786	lncRNA	lncRNA	chr1
STRG.122.3	ENSG00000162572.21	SCNN1D	protein_coding	protein_coding	chr1
STRG.122.5	ENSG00000162572.21	SCNN1D	protein_coding	protein_coding	chr1
STRG.123.1	ENSG00000131584.19	ACAP3	protein_coding	protein_coding	chr1
STRG.123.2	ENSG00000131584.19	ACAP3	protein_coding	protein_coding	chr1
STRG.124.1	ENSG00000169972.13	PUSL1	protein_coding	protein_coding	chr1
STRG.125.1	ENSG00000127054.22	INTS11	protein_coding	protein_coding	chr1
STRG.125.2	ENSG00000127054.22	INTS11	protein_coding	protein_coding	chr1
STRG.125.3	ENSG00000127054.22	INTS11	protein_coding	protein_coding	chr1
STRG.125.4	ENSG00000127054.22	INTS11	protein_coding	protein_coding	chr1
STRG.126.1	ENSG00000283712.1	MIR6727	miRNA	miRNA	chr1
STRG.125.5	ENSG00000127054.22	INTS11	protein_coding	protein_coding	chr1
STRG.127.1	ENSG00000224051.7	CPTP	protein_coding	protein_coding	chr1
STRG.130.1	ENSG00000107404.21	DVL1	protein_coding	protein_coding	chr1
STRG.130.2	ENSG00000107404.21	DVL1	protein_coding	protein_coding	chr1
STRG.131.1	ENSG00000284372.1	MIR6808	miRNA	miRNA	chr1
STRG.133.1	ENSG00000162576.17	MXRA8	protein_coding	protein_coding	chr1
STRG.133.2	ENSG00000162576.17	MXRA8	protein_coding	protein_coding	chr1
STRG.136.1	ENSG00000175756.14	AURKAIP1	protein_coding	protein_coding	chr1
STRG.136.2	ENSG00000175756.14	AURKAIP1	protein_coding	protein_coding	chr1
STRG.136.3	ENSG00000175756.14	AURKAIP1	protein_coding	protein_coding	chr1
STRG.136.4	ENSG00000175756.14	AURKAIP1	protein_coding	protein_coding	chr1
STRG.137.1	ENSG00000223663.2	NDUFB4P8	processed_pseudogene	processed_pseudogene	chr1
STRG.139.2	ENSG00000221978.13	CCNL2	protein_coding	protein_coding	chr1
STRG.140.3	ENSG00000224870.9	MRPL20-AS1	lncRNA	lncRNA	chr1
STRG.141.1	ENSG00000242485.6	MRPL20	protein_coding	protein_coding	chr1
STRG.141.2	ENSG00000242485.6	MRPL20	protein_coding	protein_coding	chr1
STRG.142.1	ENSG00000272455.1	MRPL20-DT	lncRNA	lncRNA	chr1
STRG.147.1	ENSG00000179403.12	VWA1	protein_coding	protein_coding	chr1
STRG.147.2	ENSG00000179403.12	VWA1	protein_coding	protein_coding	chr1
STRG.150.1	ENSG00000160072.20	ATAD3B	protein_coding	protein_coding	chr1
STRG.153.1	ENSG00000290916.1	ENSG00000290916	lncRNA	lncRNA	chr1
STRG.154.1	ENSG00000197785.14	ATAD3A	protein_coding	protein_coding	chr1
STRG.154.2	ENSG00000197785.14	ATAD3A	protein_coding	protein_coding	chr1
STRG.156.1	ENSG00000160075.12	SSU72	protein_coding	protein_coding	chr1
STRG.156.2	ENSG00000160075.12	SSU72	protein_coding	protein_coding	chr1
STRG.159.1	ENSG00000228594.4	FNDC10	protein_coding	protein_coding	chr1
STRG.162.1	ENSG00000272106.1	ENSG00000272106	lncRNA	lncRNA	chr1
STRG.163.1	ENSG00000197530.13	MIB2	protein_coding	protein_coding	chr1
STRG.163.2	ENSG00000197530.13	MIB2	protein_coding	protein_coding	chr1
STRG.163.3	ENSG00000197530.13	MIB2	protein_coding	protein_coding	chr1
STRG.163.4	ENSG00000197530.13	MIB2	protein_coding	protein_coding	chr1
STRG.163.8	ENSG00000197530.13	MIB2	protein_coding	protein_coding	chr1
STRG.163.9	ENSG00000197530.13	MIB2	protein_coding	protein_coding	chr1
STRG.163.10	ENSG00000197530.13	MIB2	protein_coding	protein_coding	chr1
STRG.165.1	ENSG00000248333.9	CDK11B	protein_coding	protein_coding	chr1
STRG.165.3	ENSG00000248333.9	CDK11B	protein_coding	protein_coding	chr1
STRG.165.5	ENSG00000248333.9	CDK11B	protein_coding	protein_coding	chr1
STRG.166.1	ENSG00000272004.1	ENSG00000272004	lncRNA	lncRNA	chr1
STRG.167.1	ENSG00000189339.12	SLC35E2B	protein_coding	protein_coding	chr1
STRG.167.2	ENSG00000189339.12	SLC35E2B	protein_coding	protein_coding	chr1
STRG.167.3	ENSG00000189339.12	SLC35E2B	protein_coding	protein_coding	chr1
STRG.168.1	ENSG00000269737.2	ENSG00000269737	transcribed_processed_pseudogene	processed_transcript	chr1
STRG.170.2	ENSG00000215914.4	MMP23A	unprocessed_pseudogene	unprocessed_pseudogene	chr1
STRG.165.7	ENSG00000008128.23	CDK11A	protein_coding	protein_coding	chr1
STRG.165.8	ENSG00000008128.23	CDK11A	protein_coding	protein_coding	chr1
STRG.165.9	ENSG00000008128.23	CDK11A	protein_coding	protein_coding	chr1
STRG.165.10	ENSG00000008128.23	CDK11A	protein_coding	protein_coding	chr1
STRG.165.11	ENSG00000008128.23	CDK11A	protein_coding	protein_coding	chr1
STRG.171.1	ENSG00000227775.3	ENSG00000227775	transcribed_processed_pseudogene	processed_transcript	chr1
STRG.172.1	ENSG00000290854.1	ENSG00000290854	lncRNA	lncRNA	chr1
STRG.172.6	ENSG00000215790.9	SLC35E2A	transcribed_unprocessed_pseudogene	transcribed_unprocessed_pseudogene	chr1
STRG.174.1	ENSG00000008130.15	NADK	protein_coding	protein_coding	chr1
STRG.174.2	ENSG00000008130.15	NADK	protein_coding	protein_coding	chr1
STRG.176.1	ENSG00000078369.19	GNB1	protein_coding	protein_coding	chr1
STRG.176.2	ENSG00000078369.19	GNB1	protein_coding	protein_coding	chr1
STRG.176.3	ENSG00000078369.19	GNB1	protein_coding	protein_coding	chr1
STRG.176.4	ENSG00000078369.19	GNB1	protein_coding	protein_coding	chr1
STRG.176.5	ENSG00000078369.19	GNB1	protein_coding	protein_coding	chr1
STRG.176.6	ENSG00000078369.19	GNB1	protein_coding	protein_coding	chr1
STRG.176.7	ENSG00000078369.19	GNB1	protein_coding	protein_coding	chr1
STRG.176.8	ENSG00000078369.19	GNB1	protein_coding	protein_coding	chr1
STRG.176.9	ENSG00000078369.19	GNB1	protein_coding	protein_coding	chr1
STRG.176.10	ENSG00000078369.19	GNB1	protein_coding	protein_coding	chr1
STRG.176.11	ENSG00000078369.19	GNB1	protein_coding	protein_coding	chr1
STRG.181.4	ENSG00000178821.13	TMEM52	protein_coding	protein_coding	chr1
STRG.181.5	ENSG00000178821.13	TMEM52	protein_coding	protein_coding	chr1
STRG.188.1	ENSG00000187730.9	GABRD	protein_coding	protein_coding	chr1
STRG.188.2	ENSG00000187730.9	GABRD	protein_coding	protein_coding	chr1
STRG.191.1	ENSG00000067606.17	PRKCZ	protein_coding	protein_coding	chr1
STRG.192.1	ENSG00000271806.1	ENSG00000271806	lncRNA	lncRNA	chr1
STRG.193.1	ENSG00000182873.5	PRKCZ-AS1	lncRNA	lncRNA	chr1
STRG.194.1	ENSG00000162585.17	FAAP20	protein_coding	protein_coding	chr1
STRG.194.4	ENSG00000162585.17	FAAP20	protein_coding	protein_coding	chr1
STRG.204.1	ENSG00000157933.11	SKI	protein_coding	protein_coding	chr1
STRG.205.1	ENSG00000287356.1	ENSG00000287356	lncRNA	lncRNA	chr1
STRG.205.2	ENSG00000287356.1	ENSG00000287356	lncRNA	lncRNA	chr1
STRG.206.1	ENSG00000116151.14	MORN1	protein_coding	protein_coding	chr1
STRG.207.1	ENSG00000272161.1	ENSG00000272161	lncRNA	lncRNA	chr1
STRG.208.1	ENSG00000269896.2	ENSG00000269896	transcribed_processed_pseudogene	processed_transcript	chr1
STRG.206.5	ENSG00000116151.14	MORN1	protein_coding	protein_coding	chr1
STRG.209.1	ENSG00000272420.1	ENSG00000272420	lncRNA	lncRNA	chr1
STRG.210.2	ENSG00000157916.20	RER1	protein_coding	protein_coding	chr1
STRG.210.3	ENSG00000157916.20	RER1	protein_coding	protein_coding	chr1
STRG.210.4	ENSG00000157916.20	RER1	protein_coding	protein_coding	chr1
STRG.211.1	ENSG00000157911.11	PEX10	protein_coding	protein_coding	chr1
STRG.211.2	ENSG00000157911.11	PEX10	protein_coding	protein_coding	chr1
STRG.211.3	ENSG00000157911.11	PEX10	protein_coding	protein_coding	chr1
STRG.217.1	ENSG00000157881.16	PANK4	protein_coding	protein_coding	chr1
STRG.217.3	ENSG00000157881.16	PANK4	protein_coding	protein_coding	chr1
STRG.218.1	ENSG00000197921.6	HES5	protein_coding	protein_coding	chr1
STRG.223.1	ENSG00000157870.17	PRXL2B	protein_coding	protein_coding	chr1
STRG.223.2	ENSG00000157870.17	PRXL2B	protein_coding	protein_coding	chr1
STRG.223.3	ENSG00000157870.17	PRXL2B	protein_coding	protein_coding	chr1
STRG.223.4	ENSG00000157870.17	PRXL2B	protein_coding	protein_coding	chr1
STRG.223.5	ENSG00000157870.17	PRXL2B	protein_coding	protein_coding	chr1
STRG.228.1	ENSG00000264101.1	MIR4689	miRNA	miRNA	chr1
STRG.229.1	ENSG00000131697.18	NPHP4	protein_coding	protein_coding	chr1
STRG.230.1	ENSG00000069424.16	KCNAB2	protein_coding	protein_coding	chr1
STRG.230.2	ENSG00000069424.16	KCNAB2	protein_coding	protein_coding	chr1
STRG.230.4	ENSG00000069424.16	KCNAB2	protein_coding	protein_coding	chr1
STRG.235.1	ENSG00000116251.11	RPL22	protein_coding	protein_coding	chr1
STRG.235.2	ENSG00000116251.11	RPL22	protein_coding	protein_coding	chr1
STRG.236.1	ENSG00000226944.1	RNF207-AS1	lncRNA	lncRNA	chr1
STRG.237.2	ENSG00000158286.13	RNF207	protein_coding	protein_coding	chr1
STRG.238.1	ENSG00000116237.16	ICMT	protein_coding	protein_coding	chr1
STRG.239.5	ENSG00000225077.3	ICMT-DT	lncRNA	lncRNA	chr1
STRG.241.1	ENSG00000158292.7	GPR153	protein_coding	protein_coding	chr1
STRG.242.1	ENSG00000097021.21	ACOT7	protein_coding	protein_coding	chr1
STRG.242.2	ENSG00000097021.21	ACOT7	protein_coding	protein_coding	chr1
STRG.242.3	ENSG00000097021.21	ACOT7	protein_coding	protein_coding	chr1
STRG.243.1	ENSG00000271746.1	ENSG00000271746	lncRNA	lncRNA	chr1
STRG.244.1	ENSG00000069812.11	HES2	protein_coding	protein_coding	chr1
STRG.244.2	ENSG00000069812.11	HES2	protein_coding	protein_coding	chr1
STRG.244.3	ENSG00000069812.11	HES2	protein_coding	protein_coding	chr1
STRG.249.1	ENSG00000215788.11	TNFRSF25	protein_coding	protein_coding	chr1
STRG.250.1	ENSG00000171680.23	PLEKHG5	protein_coding	protein_coding	chr1
STRG.250.2	ENSG00000171680.23	PLEKHG5	protein_coding	protein_coding	chr1
STRG.250.5	ENSG00000171680.23	PLEKHG5	protein_coding	protein_coding	chr1
STRG.250.6	ENSG00000171680.23	PLEKHG5	protein_coding	protein_coding	chr1
STRG.253.1	ENSG00000162408.11	NOL9	protein_coding	protein_coding	chr1
STRG.259.1	ENSG00000204859.13	ZBTB48	protein_coding	protein_coding	chr1
STRG.260.1	ENSG00000162413.17	KLHL21	protein_coding	protein_coding	chr1
STRG.260.2	ENSG00000162413.17	KLHL21	protein_coding	protein_coding	chr1
STRG.261.1	ENSG00000116273.6	PHF13	protein_coding	protein_coding	chr1
STRG.262.1	ENSG00000041988.16	THAP3	protein_coding	protein_coding	chr1
STRG.262.3	ENSG00000041988.16	THAP3	protein_coding	protein_coding	chr1
STRG.262.4	ENSG00000041988.16	THAP3	protein_coding	protein_coding	chr1
STRG.263.1	ENSG00000007923.17	DNAJC11	protein_coding	protein_coding	chr1
STRG.263.2	ENSG00000007923.17	DNAJC11	protein_coding	protein_coding	chr1
STRG.266.1	ENSG00000171735.20	CAMTA1	protein_coding	protein_coding	chr1
STRG.266.2	ENSG00000171735.20	CAMTA1	protein_coding	protein_coding	chr1
STRG.266.4	ENSG00000171735.20	CAMTA1	protein_coding	protein_coding	chr1
STRG.266.6	ENSG00000171735.20	CAMTA1	protein_coding	protein_coding	chr1
STRG.266.8	ENSG00000171735.20	CAMTA1	protein_coding	protein_coding	chr1
STRG.266.9	ENSG00000171735.20	CAMTA1	protein_coding	protein_coding	chr1
STRG.272.1	ENSG00000207056.1	RNU1-8P	snRNA	snRNA	chr1
STRG.285.1	ENSG00000270171.1	ENSG00000270171	lncRNA	lncRNA	chr1
STRG.266.13	ENSG00000171735.20	CAMTA1	protein_coding	protein_coding	chr1
STRG.288.1	ENSG00000049245.13	VAMP3	protein_coding	protein_coding	chr1
STRG.288.2	ENSG00000049245.13	VAMP3	protein_coding	protein_coding	chr1
STRG.289.1	ENSG00000269925.1	ENSG00000269925	lncRNA	lncRNA	chr1
STRG.295.1	ENSG00000162496.9	DHRS3	protein_coding	protein_coding	chr1
STRG.296.1	ENSG00000221340.1	RNU6ATAC18P	snRNA	snRNA	chr1
STRG.297.1	ENSG00000276830.1	MIR6730	miRNA	miRNA	chr1
STRG.298.1	ENSG00000288927.2	ENSG00000288927	lncRNA	lncRNA	chr1
STRG.298.2	ENSG00000288927.2	ENSG00000288927	lncRNA	lncRNA	chr1
STRG.299.1	ENSG00000272482.2	ENSG00000272482	lncRNA	lncRNA	chr1
STRG.301.3	ENSG00000049246.15	PER3	protein_coding	protein_coding	chr1
STRG.303.1	ENSG00000049249.10	TNFRSF9	protein_coding	protein_coding	chr1
STRG.307.1	ENSG00000116288.13	PARK7	protein_coding	protein_coding	chr1
STRG.307.2	ENSG00000116288.13	PARK7	protein_coding	protein_coding	chr1
STRG.307.3	ENSG00000116288.13	PARK7	protein_coding	protein_coding	chr1
STRG.307.4	ENSG00000116288.13	PARK7	protein_coding	protein_coding	chr1
STRG.308.1	ENSG00000200344.1	Y_RNA	misc_RNA	misc_RNA	chr1
STRG.311.1	ENSG00000116285.13	ERRFI1	protein_coding	protein_coding	chr1
STRG.311.2	ENSG00000116285.13	ERRFI1	protein_coding	protein_coding	chr1
STRG.319.1	ENSG00000251977.1	RNU6-991P	snRNA	snRNA	chr1
STRG.322.3	ENSG00000142599.20	RERE	protein_coding	protein_coding	chr1
STRG.322.4	ENSG00000142599.20	RERE	protein_coding	protein_coding	chr1
STRG.322.5	ENSG00000142599.20	RERE	protein_coding	protein_coding	chr1
STRG.322.6	ENSG00000142599.20	RERE	protein_coding	protein_coding	chr1
STRG.322.7	ENSG00000142599.20	RERE	protein_coding	protein_coding	chr1
STRG.322.8	ENSG00000142599.20	RERE	protein_coding	protein_coding	chr1
STRG.323.1	ENSG00000221083.1	ENSG00000221083	snoRNA	snoRNA	chr1
STRG.324.1	ENSG00000234619.1	RPL7P11	processed_pseudogene	processed_pseudogene	chr1
STRG.325.1	ENSG00000224315.2	RPL7P7	processed_pseudogene	processed_pseudogene	chr1
STRG.326.1	ENSG00000222511.2	Y_RNA	misc_RNA	misc_RNA	chr1
STRG.330.1	ENSG00000074800.16	ENO1	protein_coding	protein_coding	chr1
STRG.331.1	ENSG00000274258.1	MIR6728	miRNA	miRNA	chr1
STRG.332.1	ENSG00000230679.1	ENO1-AS1	lncRNA	lncRNA	chr1
STRG.334.1	ENSG00000238249.2	HMGN2P17	processed_pseudogene	processed_pseudogene	chr1
STRG.335.1	ENSG00000265141.2	RN7SL451P	misc_RNA	misc_RNA	chr1
STRG.341.1	ENSG00000180758.12	GPR157	protein_coding	protein_coding	chr1
STRG.342.1	ENSG00000228526.8	MIR34AHG	lncRNA	lncRNA	chr1
STRG.343.1	ENSG00000289914.1	ENSG00000289914	lncRNA	lncRNA	chr1
STRG.344.3	ENSG00000234546.5	LNCTAM34A	lncRNA	lncRNA	chr1
STRG.349.1	ENSG00000049239.13	H6PD	protein_coding	protein_coding	chr1
STRG.351.1	ENSG00000171621.14	SPSB1	protein_coding	protein_coding	chr1
STRG.355.1	ENSG00000284652.1	ENSG00000284652	lncRNA	lncRNA	chr1
STRG.356.2	ENSG00000284693.2	LINC02606	lncRNA	lncRNA	chr1
STRG.359.1	ENSG00000171612.7	SLC25A33	protein_coding	protein_coding	chr1
STRG.360.1	ENSG00000231181.1	ENSG00000231181	processed_pseudogene	processed_pseudogene	chr1
STRG.361.1	ENSG00000188807.13	TMEM201	protein_coding	protein_coding	chr1
STRG.361.2	ENSG00000188807.13	TMEM201	protein_coding	protein_coding	chr1
STRG.365.1	ENSG00000171608.18	PIK3CD	protein_coding	protein_coding	chr1
STRG.365.2	ENSG00000171608.18	PIK3CD	protein_coding	protein_coding	chr1
STRG.367.1	ENSG00000231789.4	PIK3CD-AS2	lncRNA	lncRNA	chr1
STRG.365.4	ENSG00000171608.18	PIK3CD	protein_coding	protein_coding	chr1
STRG.365.5	ENSG00000171608.18	PIK3CD	protein_coding	protein_coding	chr1
STRG.365.6	ENSG00000171608.18	PIK3CD	protein_coding	protein_coding	chr1
STRG.365.7	ENSG00000171608.18	PIK3CD	protein_coding	protein_coding	chr1
STRG.368.1	ENSG00000171603.18	CLSTN1	protein_coding	protein_coding	chr1
STRG.368.2	ENSG00000171603.18	CLSTN1	protein_coding	protein_coding	chr1
STRG.369.1	ENSG00000280113.2	ENSG00000280113	TEC	TEC	chr1
STRG.370.1	ENSG00000178585.15	CTNNBIP1	protein_coding	protein_coding	chr1
STRG.370.2	ENSG00000178585.15	CTNNBIP1	protein_coding	protein_coding	chr1
STRG.370.3	ENSG00000178585.15	CTNNBIP1	protein_coding	protein_coding	chr1
STRG.373.2	ENSG00000162441.12	LZIC	protein_coding	protein_coding	chr1
STRG.373.3	ENSG00000162441.12	LZIC	protein_coding	protein_coding	chr1
STRG.373.4	ENSG00000162441.12	LZIC	protein_coding	protein_coding	chr1
STRG.374.1	ENSG00000173614.14	NMNAT1	protein_coding	protein_coding	chr1
STRG.374.2	ENSG00000173614.14	NMNAT1	protein_coding	protein_coding	chr1
STRG.375.1	ENSG00000202415.1	RN7SKP269	misc_RNA	misc_RNA	chr1
STRG.381.1	ENSG00000130939.20	UBE4B	protein_coding	protein_coding	chr1
STRG.381.2	ENSG00000130939.20	UBE4B	protein_coding	protein_coding	chr1
STRG.381.3	ENSG00000130939.20	UBE4B	protein_coding	protein_coding	chr1
STRG.381.4	ENSG00000130939.20	UBE4B	protein_coding	protein_coding	chr1
STRG.382.1	ENSG00000201746.1	RNU6-828P	snRNA	snRNA	chr1
STRG.383.1	ENSG00000054523.20	KIF1B	protein_coding	protein_coding	chr1
STRG.383.2	ENSG00000054523.20	KIF1B	protein_coding	protein_coding	chr1
STRG.383.3	ENSG00000054523.20	KIF1B	protein_coding	protein_coding	chr1
STRG.383.4	ENSG00000054523.20	KIF1B	protein_coding	protein_coding	chr1
STRG.384.1	ENSG00000264881.1	ENSG00000264881	miRNA	miRNA	chr1
STRG.383.5	ENSG00000054523.20	KIF1B	protein_coding	protein_coding	chr1
STRG.385.1	ENSG00000199562.1	RNU6-37P	snRNA	snRNA	chr1
STRG.383.6	ENSG00000264501.2	RN7SL731P	misc_RNA	misc_RNA	chr1
STRG.387.1	ENSG00000142657.21	PGD	protein_coding	protein_coding	chr1
STRG.390.1	ENSG00000271989.1	ENSG00000271989	lncRNA	lncRNA	chr1
STRG.391.1	ENSG00000251503.8	CENPS-CORT	protein_coding	protein_coding	chr1
STRG.391.2	ENSG00000251503.8	CENPS-CORT	protein_coding	protein_coding	chr1
STRG.391.4	ENSG00000175279.22	CENPS	protein_coding	protein_coding	chr1
STRG.391.6	ENSG00000251503.8	CENPS-CORT	protein_coding	protein_coding	chr1
STRG.391.7	ENSG00000175279.22	CENPS	protein_coding	protein_coding	chr1
STRG.391.8	ENSG00000251503.8	CENPS-CORT	protein_coding	protein_coding	chr1
STRG.391.9	ENSG00000241563.4	CORT	protein_coding	protein_coding	chr1
STRG.392.1	ENSG00000160049.12	DFFA	protein_coding	protein_coding	chr1
STRG.392.2	ENSG00000160049.12	DFFA	protein_coding	protein_coding	chr1
STRG.393.1	ENSG00000142655.13	PEX14	protein_coding	protein_coding	chr1
STRG.394.1	ENSG00000243267.3	RN7SL614P	misc_RNA	misc_RNA	chr1
STRG.396.1	ENSG00000130940.15	CASZ1	protein_coding	protein_coding	chr1
STRG.396.5	ENSG00000130940.15	CASZ1	protein_coding	protein_coding	chr1
STRG.402.1	ENSG00000120948.19	TARDBP	protein_coding	protein_coding	chr1
STRG.402.2	ENSG00000120948.19	TARDBP	protein_coding	protein_coding	chr1
STRG.405.1	ENSG00000116649.10	SRM	protein_coding	protein_coding	chr1
STRG.407.1	ENSG00000171824.14	EXOSC10	protein_coding	protein_coding	chr1
STRG.407.2	ENSG00000171824.14	EXOSC10	protein_coding	protein_coding	chr1
STRG.408.1	ENSG00000226849.1	ENSG00000226849	lncRNA	lncRNA	chr1
STRG.409.1	ENSG00000230337.3	EXOSC10-AS1	lncRNA	lncRNA	chr1
STRG.410.1	ENSG00000198793.14	MTOR	protein_coding	protein_coding	chr1
STRG.412.3	ENSG00000120942.14	UBIAD1	protein_coding	protein_coding	chr1
STRG.412.5	ENSG00000120942.14	UBIAD1	protein_coding	protein_coding	chr1
STRG.420.1	ENSG00000116661.11	FBXO2	protein_coding	protein_coding	chr1
STRG.421.1	ENSG00000132879.14	FBXO44	protein_coding	protein_coding	chr1
STRG.421.2	ENSG00000132879.14	FBXO44	protein_coding	protein_coding	chr1
STRG.421.3	ENSG00000132879.14	FBXO44	protein_coding	protein_coding	chr1
STRG.421.7	ENSG00000132879.14	FBXO44	protein_coding	protein_coding	chr1
STRG.422.1	ENSG00000116663.11	FBXO6	protein_coding	protein_coding	chr1
STRG.423.1	ENSG00000116670.16	MAD2L2	protein_coding	protein_coding	chr1
STRG.423.2	ENSG00000116670.16	MAD2L2	protein_coding	protein_coding	chr1
STRG.423.3	ENSG00000116670.16	MAD2L2	protein_coding	protein_coding	chr1
STRG.423.4	ENSG00000116670.16	MAD2L2	protein_coding	protein_coding	chr1
STRG.423.5	ENSG00000116670.16	MAD2L2	protein_coding	protein_coding	chr1
STRG.424.1	ENSG00000162490.7	DRAXIN	protein_coding	protein_coding	chr1
STRG.426.1	ENSG00000177674.16	AGTRAP	protein_coding	protein_coding	chr1
STRG.426.2	ENSG00000177674.16	AGTRAP	protein_coding	protein_coding	chr1
STRG.426.3	ENSG00000177674.16	AGTRAP	protein_coding	protein_coding	chr1
STRG.426.4	ENSG00000177674.16	AGTRAP	protein_coding	protein_coding	chr1
STRG.430.1	ENSG00000177000.13	MTHFR	protein_coding	protein_coding	chr1
STRG.430.2	ENSG00000177000.13	MTHFR	protein_coding	protein_coding	chr1
STRG.430.5	ENSG00000177000.13	MTHFR	protein_coding	protein_coding	chr1
STRG.431.1	ENSG00000011021.23	CLCN6	protein_coding	protein_coding	chr1
STRG.431.2	ENSG00000011021.23	CLCN6	protein_coding	protein_coding	chr1
STRG.431.3	ENSG00000011021.23	CLCN6	protein_coding	protein_coding	chr1
STRG.432.1	ENSG00000276470.1	ENSG00000276470	misc_RNA	misc_RNA	chr1
STRG.433.1	ENSG00000278852.1	ENSG00000278852	misc_RNA	misc_RNA	chr1
STRG.434.1	ENSG00000275915.1	ENSG00000275915	misc_RNA	misc_RNA	chr1
STRG.437.1	ENSG00000199347.1	RNU5E-1	snRNA	snRNA	chr1
STRG.438.1	ENSG00000201801.1	RNU5E-4P	snRNA	snRNA	chr1
STRG.440.1	ENSG00000116685.16	KIAA2013	protein_coding	protein_coding	chr1
STRG.440.2	ENSG00000116685.16	KIAA2013	protein_coding	protein_coding	chr1
STRG.442.1	ENSG00000083444.17	PLOD1	protein_coding	protein_coding	chr1
STRG.444.1	ENSG00000287384.1	ENSG00000287384	lncRNA	lncRNA	chr1
STRG.445.1	ENSG00000116688.18	MFN2	protein_coding	protein_coding	chr1
STRG.445.2	ENSG00000116688.18	MFN2	protein_coding	protein_coding	chr1
STRG.445.3	ENSG00000116688.18	MFN2	protein_coding	protein_coding	chr1
STRG.445.4	ENSG00000116688.18	MFN2	protein_coding	protein_coding	chr1
STRG.445.6	ENSG00000116688.18	MFN2	protein_coding	protein_coding	chr1
STRG.445.7	ENSG00000116688.18	MFN2	protein_coding	protein_coding	chr1
STRG.447.1	ENSG00000270914.1	ENSG00000270914	processed_pseudogene	processed_pseudogene	chr1
STRG.449.1	ENSG00000116691.11	MIIP	protein_coding	protein_coding	chr1
STRG.450.1	ENSG00000276869.1	MIR6729	miRNA	miRNA	chr1
STRG.455.2	ENSG00000048707.15	VPS13D	protein_coding	protein_coding	chr1
STRG.455.5	ENSG00000048707.15	VPS13D	protein_coding	protein_coding	chr1
STRG.456.1	ENSG00000239149.1	SNORA59A	snoRNA	snoRNA	chr1
STRG.459.1	ENSG00000179023.9	KLHDC7A	protein_coding	protein_coding	chr1
STRG.460.1	ENSG00000117154.12	IGSF21	protein_coding	protein_coding	chr1
STRG.461.1	ENSG00000280222.1	ENSG00000280222	TEC	TEC	chr1
STRG.464.1	ENSG00000162493.17	PDPN	protein_coding	protein_coding	chr1
STRG.464.2	ENSG00000162493.17	PDPN	protein_coding	protein_coding	chr1
STRG.464.3	ENSG00000162493.17	PDPN	protein_coding	protein_coding	chr1
STRG.464.4	ENSG00000162493.17	PDPN	protein_coding	protein_coding	chr1
STRG.464.5	ENSG00000162493.17	PDPN	protein_coding	protein_coding	chr1
STRG.464.6	ENSG00000162493.17	PDPN	protein_coding	protein_coding	chr1
STRG.467.1	ENSG00000253085.1	ENSG00000253085	scaRNA	scaRNA	chr1
STRG.468.1	ENSG00000116731.23	PRDM2	protein_coding	protein_coding	chr1
STRG.468.3	ENSG00000116731.23	PRDM2	protein_coding	protein_coding	chr1
STRG.468.6	ENSG00000116731.23	PRDM2	protein_coding	protein_coding	chr1
STRG.468.8	ENSG00000116731.23	PRDM2	protein_coding	protein_coding	chr1
STRG.470.1	ENSG00000289380.1	ENSG00000289380	lncRNA	lncRNA	chr1
STRG.474.1	ENSG00000189337.17	KAZN	protein_coding	protein_coding	chr1
STRG.474.3	ENSG00000189337.17	KAZN	protein_coding	protein_coding	chr1
STRG.474.5	ENSG00000189337.17	KAZN	protein_coding	protein_coding	chr1
STRG.474.6	ENSG00000189337.17	KAZN	protein_coding	protein_coding	chr1
STRG.498.1	ENSG00000175147.13	TMEM51-AS1	lncRNA	lncRNA	chr1
STRG.499.1	ENSG00000171729.14	TMEM51	protein_coding	protein_coding	chr1
STRG.499.2	ENSG00000171729.14	TMEM51	protein_coding	protein_coding	chr1
STRG.499.4	ENSG00000171729.14	TMEM51	protein_coding	protein_coding	chr1
STRG.499.5	ENSG00000171729.14	TMEM51	protein_coding	protein_coding	chr1
STRG.499.6	ENSG00000171729.14	TMEM51	protein_coding	protein_coding	chr1
STRG.508.1	ENSG00000142634.13	EFHD2	protein_coding	protein_coding	chr1
STRG.515.1	ENSG00000132906.18	CASP9	protein_coding	protein_coding	chr1
STRG.515.2	ENSG00000132906.18	CASP9	protein_coding	protein_coding	chr1
STRG.515.3	ENSG00000132906.18	CASP9	protein_coding	protein_coding	chr1
STRG.516.1	ENSG00000116138.13	DNAJC16	protein_coding	protein_coding	chr1
STRG.516.2	ENSG00000116138.13	DNAJC16	protein_coding	protein_coding	chr1
STRG.516.3	ENSG00000116138.13	DNAJC16	protein_coding	protein_coding	chr1
STRG.517.1	ENSG00000251866.1	SCARNA21B	scaRNA	scaRNA	chr1
STRG.518.1	ENSG00000272510.1	ENSG00000272510	lncRNA	lncRNA	chr1
STRG.519.1	ENSG00000116771.6	AGMAT	protein_coding	protein_coding	chr1
STRG.521.1	ENSG00000235084.3	CHCHD2P6	processed_pseudogene	processed_pseudogene	chr1
STRG.524.1	ENSG00000197312.12	DDI2	protein_coding	protein_coding	chr1
STRG.524.2	ENSG00000215695.2	RSC1A1	protein_coding	protein_coding	chr1
STRG.528.1	ENSG00000271742.1	ENSG00000271742	lncRNA	lncRNA	chr1
STRG.529.1	ENSG00000116786.13	PLEKHM2	protein_coding	protein_coding	chr1
STRG.529.2	ENSG00000116786.13	PLEKHM2	protein_coding	protein_coding	chr1
STRG.529.3	ENSG00000116786.13	PLEKHM2	protein_coding	protein_coding	chr1
STRG.533.1	ENSG00000162458.13	FBLIM1	protein_coding	protein_coding	chr1
STRG.535.1	ENSG00000224321.1	RPL12P14	processed_pseudogene	processed_pseudogene	chr1
STRG.538.1	ENSG00000233954.7	UQCRHL	protein_coding	protein_coding	chr1
STRG.538.2	ENSG00000233954.7	UQCRHL	protein_coding	protein_coding	chr1
STRG.543.1	ENSG00000065526.13	SPEN	protein_coding	protein_coding	chr1
STRG.544.1	ENSG00000270620.1	ENSG00000270620	unprocessed_pseudogene	unprocessed_pseudogene	chr1
STRG.545.1	ENSG00000116809.12	ZBTB17	protein_coding	protein_coding	chr1
STRG.545.2	ENSG00000116809.12	ZBTB17	protein_coding	protein_coding	chr1
STRG.546.1	ENSG00000234607.2	ENSG00000234607	processed_pseudogene	processed_pseudogene	chr1
STRG.548.1	ENSG00000173641.18	HSPB7	protein_coding	protein_coding	chr1
STRG.552.1	ENSG00000232456.1	FAM131C2P	unprocessed_pseudogene	unprocessed_pseudogene	chr1
STRG.550.2	ENSG00000184908.20	CLCNKB	protein_coding	protein_coding	chr1
STRG.553.1	ENSG00000185519.9	FAM131C	protein_coding	protein_coding	chr1
STRG.554.1	ENSG00000142627.13	EPHA2	protein_coding	protein_coding	chr1
STRG.555.1	ENSG00000227959.2	EPHA2-AS1	lncRNA	lncRNA	chr1
STRG.556.1	ENSG00000224621.1	ENSG00000224621	lncRNA	lncRNA	chr1
STRG.562.3	ENSG00000291077.1	ENSG00000291077	lncRNA	lncRNA	chr1
STRG.563.1	ENSG00000288398.1	ENSG00000288398	lncRNA	lncRNA	chr1
STRG.563.2	ENSG00000132881.12	CPLANE2	protein_coding	protein_coding	chr1
STRG.563.3	ENSG00000132881.12	CPLANE2	protein_coding	protein_coding	chr1
STRG.567.1	ENSG00000233929.1	MT1XP1	processed_pseudogene	processed_pseudogene	chr1
STRG.568.1	ENSG00000037637.11	FBXO42	protein_coding	protein_coding	chr1
STRG.572.1	ENSG00000055070.17	SZRD1	protein_coding	protein_coding	chr1
STRG.572.2	ENSG00000055070.17	SZRD1	protein_coding	protein_coding	chr1
STRG.572.3	ENSG00000055070.17	SZRD1	protein_coding	protein_coding	chr1
STRG.572.4	ENSG00000055070.17	SZRD1	protein_coding	protein_coding	chr1
STRG.573.1	ENSG00000226457.1	RPL22P3	processed_pseudogene	processed_pseudogene	chr1
STRG.577.1	ENSG00000157191.20	NECAP2	protein_coding	protein_coding	chr1
STRG.577.2	ENSG00000157191.20	NECAP2	protein_coding	protein_coding	chr1
STRG.578.1	ENSG00000226029.1	LINC01772	lncRNA	lncRNA	chr1
STRG.586.1	ENSG00000206652.1	RNU1-1	snRNA	snRNA	chr1
STRG.587.1	ENSG00000261135.1	ENSG00000261135	lncRNA	lncRNA	chr1
STRG.588.1	ENSG00000277344.1	RNU1-6P	snRNA	snRNA	chr1
STRG.592.1	ENSG00000219481.11	NBPF1	protein_coding	protein_coding	chr1
STRG.592.9	ENSG00000291072.1	CROCCP2	lncRNA	lncRNA	chr1
STRG.592.10	ENSG00000291072.1	CROCCP2	lncRNA	lncRNA	chr1
STRG.592.11	ENSG00000291072.1	CROCCP2	lncRNA	lncRNA	chr1
STRG.592.14	ENSG00000291072.1	CROCCP2	lncRNA	lncRNA	chr1
STRG.592.15	ENSG00000283773.1	ENSG00000283773	transcribed_unprocessed_pseudogene	transcribed_unprocessed_pseudogene	chr1
STRG.595.1	ENSG00000207513.1	RNU1-3	snRNA	snRNA	chr1
STRG.599.1	ENSG00000236698.1	EIF1AXP1	processed_pseudogene	processed_pseudogene	chr1
STRG.605.1	ENSG00000290850.1	ENSG00000290850	lncRNA	lncRNA	chr1
STRG.606.1	ENSG00000207389.1	RNU1-4	snRNA	snRNA	chr1
STRG.611.1	ENSG00000277234.1	RNU1-5P	snRNA	snRNA	chr1
STRG.613.1	ENSG00000235241.1	ENSG00000235241	processed_pseudogene	processed_pseudogene	chr1
STRG.614.1	ENSG00000207005.1	RNU1-2	snRNA	snRNA	chr1
STRG.615.1	ENSG00000272426.1	ENSG00000272426	lncRNA	lncRNA	chr1
STRG.616.1	ENSG00000290122.1	ENSG00000290122	lncRNA	lncRNA	chr1
STRG.617.6	ENSG00000058453.17	CROCC	protein_coding	protein_coding	chr1
STRG.620.1	ENSG00000117122.14	MFAP2	protein_coding	protein_coding	chr1
STRG.620.2	ENSG00000117122.14	MFAP2	protein_coding	protein_coding	chr1
STRG.621.1	ENSG00000159363.19	ATP13A2	protein_coding	protein_coding	chr1
STRG.621.2	ENSG00000159363.19	ATP13A2	protein_coding	protein_coding	chr1
STRG.621.4	ENSG00000159363.19	ATP13A2	protein_coding	protein_coding	chr1
STRG.625.1	ENSG00000117118.10	SDHB	protein_coding	protein_coding	chr1
STRG.626.1	ENSG00000117115.13	PADI2	protein_coding	protein_coding	chr1
STRG.626.2	ENSG00000117115.13	PADI2	protein_coding	protein_coding	chr1
STRG.629.1	ENSG00000142619.4	PADI3	protein_coding	protein_coding	chr1
STRG.633.1	ENSG00000179051.14	RCC2	protein_coding	protein_coding	chr1
STRG.633.2	ENSG00000179051.14	RCC2	protein_coding	protein_coding	chr1
STRG.634.1	ENSG00000290096.1	ENSG00000290096	lncRNA	lncRNA	chr1
STRG.641.2	ENSG00000009709.12	PAX7	protein_coding	protein_coding	chr1
STRG.642.1	ENSG00000159423.17	ALDH4A1	protein_coding	protein_coding	chr1
STRG.642.2	ENSG00000159423.17	ALDH4A1	protein_coding	protein_coding	chr1
STRG.643.1	ENSG00000265606.1	MIR4695	miRNA	miRNA	chr1
STRG.645.1	ENSG00000169991.11	IFFO2	protein_coding	protein_coding	chr1
STRG.646.1	ENSG00000272084.1	ENSG00000272084	lncRNA	lncRNA	chr1
STRG.646.2	ENSG00000127481.15	UBR4	protein_coding	protein_coding	chr1
STRG.646.3	ENSG00000127481.15	UBR4	protein_coding	protein_coding	chr1
STRG.646.4	ENSG00000127481.15	UBR4	protein_coding	protein_coding	chr1
STRG.646.5	ENSG00000127481.15	UBR4	protein_coding	protein_coding	chr1
STRG.646.6	ENSG00000127481.15	UBR4	protein_coding	protein_coding	chr1
STRG.647.1	ENSG00000230424.3	EMC1-AS1	lncRNA	lncRNA	chr1
STRG.648.1	ENSG00000127463.16	EMC1	protein_coding	protein_coding	chr1
STRG.648.2	ENSG00000127463.16	EMC1	protein_coding	protein_coding	chr1
STRG.648.3	ENSG00000127463.16	EMC1	protein_coding	protein_coding	chr1
STRG.649.1	ENSG00000053372.5	MRTO4	protein_coding	protein_coding	chr1
STRG.652.5	ENSG00000211454.16	AKR7L	protein_coding	protein_coding_LoF	chr1
STRG.652.7	ENSG00000162482.5	AKR7A3	protein_coding	protein_coding	chr1
STRG.653.1	ENSG00000053371.13	AKR7A2	protein_coding	protein_coding	chr1
STRG.654.1	ENSG00000200403.1	RNU6-1099P	snRNA	snRNA	chr1
STRG.655.3	ENSG00000040487.13	SLC66A1	protein_coding	protein_coding	chr1
STRG.655.4	ENSG00000040487.13	SLC66A1	protein_coding	protein_coding	chr1
STRG.655.5	ENSG00000040487.13	SLC66A1	protein_coding	protein_coding	chr1
STRG.656.1	ENSG00000077549.19	CAPZB	protein_coding	protein_coding	chr1
STRG.656.2	ENSG00000077549.19	CAPZB	protein_coding	protein_coding	chr1
STRG.656.3	ENSG00000077549.19	CAPZB	protein_coding	protein_coding	chr1
STRG.657.1	ENSG00000240490.3	RN7SL277P	misc_RNA	misc_RNA	chr1
STRG.659.1	ENSG00000173436.15	MICOS10	protein_coding	protein_coding	chr1
STRG.659.2	ENSG00000173436.15	MICOS10	protein_coding	protein_coding	chr1
STRG.660.1	ENSG00000226396.1	ENSG00000226396	processed_pseudogene	processed_pseudogene	chr1
STRG.661.1	ENSG00000158747.15	NBL1	protein_coding	protein_coding	chr1
STRG.661.2	ENSG00000158747.15	NBL1	protein_coding	protein_coding	chr1
STRG.662.1	ENSG00000158748.4	HTR6	protein_coding	protein_coding	chr1
STRG.663.1	ENSG00000162542.14	TMCO4	protein_coding	protein_coding	chr1
STRG.664.1	ENSG00000169914.6	OTUD3	protein_coding	protein_coding	chr1
STRG.670.1	ENSG00000185436.12	IFNLR1	protein_coding	protein_coding	chr1
STRG.670.4	ENSG00000185436.12	IFNLR1	protein_coding	protein_coding	chr1
STRG.678.1	ENSG00000001460.18	STPG1	protein_coding	protein_coding	chr1
STRG.679.1	ENSG00000001461.17	NIPAL3	protein_coding	protein_coding	chr1
STRG.679.2	ENSG00000001461.17	NIPAL3	protein_coding	protein_coding	chr1
STRG.679.3	ENSG00000001461.17	NIPAL3	protein_coding	protein_coding	chr1
STRG.679.4	ENSG00000001461.17	NIPAL3	protein_coding	protein_coding	chr1
STRG.680.1	ENSG00000288982.1	ENSG00000288982	lncRNA	lncRNA	chr1
STRG.682.1	ENSG00000117602.13	RCAN3	protein_coding	protein_coding	chr1
STRG.682.2	ENSG00000117602.13	RCAN3	protein_coding	protein_coding	chr1
STRG.682.3	ENSG00000117602.13	RCAN3	protein_coding	protein_coding	chr1
STRG.682.4	ENSG00000117602.13	RCAN3	protein_coding	protein_coding	chr1
STRG.682.5	ENSG00000117602.13	RCAN3	protein_coding	protein_coding	chr1
STRG.684.1	ENSG00000133226.19	SRRM1	protein_coding	protein_coding	chr1
STRG.684.2	ENSG00000133226.19	SRRM1	protein_coding	protein_coding	chr1
STRG.684.3	ENSG00000133226.19	SRRM1	protein_coding	protein_coding	chr1
STRG.684.4	ENSG00000133226.19	SRRM1	protein_coding	protein_coding	chr1
STRG.684.7	ENSG00000133226.19	SRRM1	protein_coding	protein_coding	chr1
STRG.689.1	ENSG00000169504.15	CLIC4	protein_coding	protein_coding	chr1
STRG.692.1	ENSG00000020633.19	RUNX3	protein_coding	protein_coding	chr1
STRG.693.1	ENSG00000278034.1	MIR6731	miRNA	miRNA	chr1
STRG.699.1	ENSG00000162545.6	CAMK2N1	protein_coding	protein_coding	chr1
STRG.700.1	ENSG00000289402.2	ENSG00000289402	lncRNA	lncRNA	chr1
STRG.701.1	ENSG00000090432.7	MUL1	protein_coding	protein_coding	chr1
STRG.703.1	ENSG00000183114.8	FAM43B	protein_coding	protein_coding	chr1
STRG.705.1	ENSG00000158825.6	CDA	protein_coding	protein_coding	chr1
STRG.706.1	ENSG00000158828.8	PINK1	protein_coding	protein_coding	chr1
STRG.707.1	ENSG00000244038.11	DDOST	protein_coding	protein_coding	chr1
STRG.707.2	ENSG00000244038.11	DDOST	protein_coding	protein_coding	chr1
STRG.709.1	ENSG00000117245.13	KIF17	protein_coding	protein_coding	chr1
STRG.709.2	ENSG00000117245.13	KIF17	protein_coding	protein_coding	chr1
STRG.712.1	ENSG00000127483.19	HP1BP3	protein_coding	protein_coding	chr1
STRG.712.7	ENSG00000127483.19	HP1BP3	protein_coding	protein_coding	chr1
STRG.712.9	ENSG00000127483.19	HP1BP3	protein_coding	protein_coding	chr1
STRG.712.10	ENSG00000127483.19	HP1BP3	protein_coding	protein_coding	chr1
STRG.716.1	ENSG00000075151.24	EIF4G3	protein_coding	protein_coding	chr1
STRG.716.2	ENSG00000075151.24	EIF4G3	protein_coding	protein_coding	chr1
STRG.716.3	ENSG00000075151.24	EIF4G3	protein_coding	protein_coding	chr1
STRG.716.5	ENSG00000075151.24	EIF4G3	protein_coding	protein_coding	chr1
STRG.717.1	ENSG00000221808.1	MIR1256	miRNA	miRNA	chr1
STRG.718.1	ENSG00000233072.1	RPS15AP6	processed_pseudogene	processed_pseudogene	chr1
STRG.719.1	ENSG00000236073.2	ENSG00000236073	processed_pseudogene	processed_pseudogene	chr1
STRG.720.1	ENSG00000287192.1	ENSG00000287192	lncRNA	lncRNA	chr1
STRG.723.1	ENSG00000117298.16	ECE1	protein_coding	protein_coding	chr1
STRG.723.2	ENSG00000117298.16	ECE1	protein_coding	protein_coding	chr1
STRG.723.3	ENSG00000117298.16	ECE1	protein_coding	protein_coding	chr1
STRG.723.4	ENSG00000117298.16	ECE1	protein_coding	protein_coding	chr1
STRG.723.5	ENSG00000117298.16	ECE1	protein_coding	protein_coding	chr1
STRG.725.1	ENSG00000236216.5	PPP1R11P1	processed_pseudogene	processed_pseudogene	chr1
STRG.728.1	ENSG00000187952.9	HS6ST1P1	processed_pseudogene	processed_pseudogene	chr1
STRG.732.1	ENSG00000142794.19	NBPF3	protein_coding	protein_coding	chr1
STRG.732.7	ENSG00000142794.19	NBPF3	protein_coding	protein_coding	chr1
STRG.733.1	ENSG00000162551.14	ALPL	protein_coding	protein_coding	chr1
STRG.733.2	ENSG00000162551.14	ALPL	protein_coding	protein_coding	chr1
STRG.733.3	ENSG00000162551.14	ALPL	protein_coding	protein_coding	chr1
STRG.734.1	ENSG00000076864.21	RAP1GAP	protein_coding	protein_coding	chr1
STRG.734.2	ENSG00000076864.21	RAP1GAP	protein_coding	protein_coding	chr1
STRG.734.5	ENSG00000076864.21	RAP1GAP	protein_coding	protein_coding	chr1
STRG.738.1	ENSG00000090686.16	USP48	protein_coding	protein_coding	chr1
STRG.738.3	ENSG00000090686.16	USP48	protein_coding	protein_coding	chr1
STRG.738.4	ENSG00000090686.16	USP48	protein_coding	protein_coding	chr1
STRG.738.5	ENSG00000090686.16	USP48	protein_coding	protein_coding	chr1
STRG.741.1	ENSG00000142798.20	HSPG2	protein_coding	protein_coding	chr1
STRG.742.1	ENSG00000232037.3	ENSG00000232037	processed_pseudogene	processed_pseudogene	chr1
STRG.745.2	ENSG00000228397.3	LINC01635	lncRNA	lncRNA	chr1
STRG.745.3	ENSG00000228397.3	LINC01635	lncRNA	lncRNA	chr1
STRG.746.1	ENSG00000218510.9	LINC00339	lncRNA	lncRNA	chr1
STRG.746.4	ENSG00000285794.1	ENSG00000285794	transcribed_processed_pseudogene	transcribed_processed_pseudogene	chr1
STRG.748.1	ENSG00000070831.18	CDC42	protein_coding	protein_coding	chr1
STRG.748.2	ENSG00000070831.18	CDC42	protein_coding	protein_coding	chr1
STRG.748.3	ENSG00000070831.18	CDC42	protein_coding	protein_coding	chr1
STRG.748.4	ENSG00000070831.18	CDC42	protein_coding	protein_coding	chr1
STRG.748.5	ENSG00000070831.18	CDC42	protein_coding	protein_coding	chr1
STRG.748.6	ENSG00000070831.18	CDC42	protein_coding	protein_coding	chr1
STRG.749.1	ENSG00000230068.2	CDC42-IT1	lncRNA	lncRNA	chr1
STRG.748.7	ENSG00000070831.18	CDC42	protein_coding	protein_coding	chr1
STRG.748.8	ENSG00000070831.18	CDC42	protein_coding	protein_coding	chr1
STRG.748.9	ENSG00000070831.18	CDC42	protein_coding	protein_coding	chr1
STRG.751.1	ENSG00000162552.15	WNT4	protein_coding	protein_coding	chr1
STRG.759.1	ENSG00000234397.3	PPIAP34	processed_pseudogene	processed_pseudogene	chr1
STRG.760.1	ENSG00000279625.1	ENSG00000279625	TEC	TEC	chr1
STRG.762.1	ENSG00000184677.18	ZBTB40	protein_coding	protein_coding	chr1
STRG.762.2	ENSG00000184677.18	ZBTB40	protein_coding	protein_coding	chr1
STRG.762.3	ENSG00000184677.18	ZBTB40	protein_coding	protein_coding	chr1
STRG.763.3	ENSG00000070886.12	EPHA8	protein_coding	protein_coding	chr1
STRG.767.1	ENSG00000133216.17	EPHB2	protein_coding	protein_coding	chr1
STRG.767.2	ENSG00000133216.17	EPHB2	protein_coding	protein_coding	chr1
STRG.770.1	ENSG00000004487.18	KDM1A	protein_coding	protein_coding	chr1
STRG.770.2	ENSG00000004487.18	KDM1A	protein_coding	protein_coding	chr1
STRG.770.3	ENSG00000004487.18	KDM1A	protein_coding	protein_coding	chr1
STRG.770.4	ENSG00000004487.18	KDM1A	protein_coding	protein_coding	chr1
STRG.770.5	ENSG00000004487.18	KDM1A	protein_coding	protein_coding	chr1
STRG.770.6	ENSG00000004487.18	KDM1A	protein_coding	protein_coding	chr1
STRG.770.7	ENSG00000004487.18	KDM1A	protein_coding	protein_coding	chr1
STRG.770.8	ENSG00000004487.18	KDM1A	protein_coding	protein_coding	chr1
STRG.770.9	ENSG00000004487.18	KDM1A	protein_coding	protein_coding	chr1
STRG.770.10	ENSG00000004487.18	KDM1A	protein_coding	protein_coding	chr1
STRG.771.1	ENSG00000263793.1	MIR3115	miRNA	miRNA	chr1
STRG.772.1	ENSG00000169641.15	LUZP1	protein_coding	protein_coding	chr1
STRG.774.1	ENSG00000289014.1	ENSG00000289014	lncRNA	lncRNA	chr1
STRG.779.1	ENSG00000179546.5	HTR1D	protein_coding	protein_coding	chr1
STRG.780.1	ENSG00000215381.3	ENSG00000215381	processed_pseudogene	processed_pseudogene	chr1
STRG.782.3	ENSG00000125944.21	HNRNPR	protein_coding	protein_coding	chr1
STRG.782.4	ENSG00000125944.21	HNRNPR	protein_coding	protein_coding	chr1
STRG.782.5	ENSG00000125944.21	HNRNPR	protein_coding	protein_coding	chr1
STRG.782.6	ENSG00000125944.21	HNRNPR	protein_coding	protein_coding	chr1
STRG.782.7	ENSG00000125944.21	HNRNPR	protein_coding	protein_coding	chr1
STRG.784.2	ENSG00000125945.15	ZNF436	protein_coding	protein_coding	chr1
STRG.784.3	ENSG00000125945.15	ZNF436	protein_coding	protein_coding	chr1
STRG.785.1	ENSG00000249087.9	ZNF436-AS1	lncRNA	lncRNA	chr1
STRG.785.2	ENSG00000249087.9	ZNF436-AS1	lncRNA	lncRNA	chr1
STRG.785.3	ENSG00000249087.9	ZNF436-AS1	lncRNA	lncRNA	chr1
STRG.785.4	ENSG00000249087.9	ZNF436-AS1	lncRNA	lncRNA	chr1
STRG.785.5	ENSG00000201405.1	Y_RNA	misc_RNA	misc_RNA	chr1
STRG.788.1	ENSG00000271420.1	ENSG00000271420	lncRNA	lncRNA	chr1
STRG.792.1	ENSG00000088280.20	ASAP3	protein_coding	protein_coding	chr1
STRG.792.2	ENSG00000088280.20	ASAP3	protein_coding	protein_coding	chr1
STRG.793.1	ENSG00000007968.7	E2F2	protein_coding	protein_coding	chr1
STRG.796.1	ENSG00000117318.9	ID3	protein_coding	protein_coding	chr1
STRG.800.1	ENSG00000142676.14	RPL11	protein_coding	protein_coding	chr1
STRG.800.2	ENSG00000142676.14	RPL11	protein_coding	protein_coding	chr1
STRG.800.3	ENSG00000142676.14	RPL11	protein_coding	protein_coding	chr1
STRG.809.1	ENSG00000011007.13	ELOA	protein_coding	protein_coding	chr1
STRG.810.1	ENSG00000236810.8	ELOA-AS1	lncRNA	lncRNA	chr1
STRG.810.2	ENSG00000236810.8	ELOA-AS1	lncRNA	lncRNA	chr1
STRG.810.3	ENSG00000236810.8	ELOA-AS1	lncRNA	lncRNA	chr1
STRG.811.1	ENSG00000057757.10	PITHD1	protein_coding	protein_coding	chr1
STRG.813.1	ENSG00000011009.11	LYPLA2	protein_coding	protein_coding	chr1
STRG.813.3	ENSG00000011009.11	LYPLA2	protein_coding	protein_coding	chr1
STRG.813.4	ENSG00000011009.11	LYPLA2	protein_coding	protein_coding	chr1
STRG.814.1	ENSG00000117308.15	GALE	protein_coding	protein_coding	chr1
STRG.814.3	ENSG00000117308.15	GALE	protein_coding	protein_coding	chr1
STRG.815.1	ENSG00000117305.15	HMGCL	protein_coding	protein_coding	chr1
STRG.815.2	ENSG00000117305.15	HMGCL	protein_coding	protein_coding	chr1
STRG.818.1	ENSG00000179163.12	FUCA1	protein_coding	protein_coding	chr1
STRG.822.1	ENSG00000230228.2	H3P1	processed_pseudogene	processed_pseudogene	chr1
STRG.824.1	ENSG00000189266.13	PNRC2	protein_coding	protein_coding	chr1
STRG.824.2	ENSG00000189266.13	PNRC2	protein_coding	protein_coding	chr1
STRG.824.3	ENSG00000189266.13	PNRC2	protein_coding	protein_coding	chr1
STRG.825.1	ENSG00000188529.15	SRSF10	protein_coding	protein_coding	chr1
STRG.825.2	ENSG00000188529.15	SRSF10	protein_coding	protein_coding	chr1
STRG.825.5	ENSG00000188529.15	SRSF10	protein_coding	protein_coding	chr1
STRG.825.6	ENSG00000188529.15	SRSF10	protein_coding	protein_coding	chr1
STRG.825.7	ENSG00000188529.15	SRSF10	protein_coding	protein_coding	chr1
STRG.825.8	ENSG00000188529.15	SRSF10	protein_coding	protein_coding	chr1
STRG.843.1	ENSG00000222784.1	RN7SKP91	misc_RNA	misc_RNA	chr1
STRG.844.1	ENSG00000162512.16	SDC3	protein_coding	protein_coding	chr1
STRG.844.2	ENSG00000162512.16	SDC3	protein_coding	protein_coding	chr1
STRG.845.1	ENSG00000134644.16	PUM1	protein_coding	protein_coding	chr1
STRG.845.2	ENSG00000134644.16	PUM1	protein_coding	protein_coding	chr1
STRG.845.4	ENSG00000134644.16	PUM1	protein_coding	protein_coding	chr1
STRG.845.5	ENSG00000134644.16	PUM1	protein_coding	protein_coding	chr1
STRG.845.6	ENSG00000134644.16	PUM1	protein_coding	protein_coding	chr1
STRG.845.7	ENSG00000134644.16	PUM1	protein_coding	protein_coding	chr1
STRG.851.1	ENSG00000084628.10	NKAIN1	protein_coding	protein_coding	chr1
STRG.852.1	ENSG00000060688.13	SNRNP40	protein_coding	protein_coding	chr1
STRG.852.2	ENSG00000060688.13	SNRNP40	protein_coding	protein_coding	chr1
STRG.853.1	ENSG00000229447.2	ENSG00000229447	processed_pseudogene	processed_pseudogene	chr1
STRG.854.1	ENSG00000121766.16	ZCCHC17	protein_coding	protein_coding	chr1
STRG.854.2	ENSG00000121766.16	ZCCHC17	protein_coding	protein_coding	chr1
STRG.854.3	ENSG00000121766.16	ZCCHC17	protein_coding	protein_coding	chr1
STRG.854.4	ENSG00000121766.16	ZCCHC17	protein_coding	protein_coding	chr1
STRG.854.5	ENSG00000121766.16	ZCCHC17	protein_coding	protein_coding	chr1
STRG.854.6	ENSG00000121766.16	ZCCHC17	protein_coding	protein_coding	chr1
STRG.855.1	ENSG00000121769.8	FABP3	protein_coding	protein_coding	chr1
STRG.857.1	ENSG00000168528.12	SERINC2	protein_coding	protein_coding	chr1
STRG.857.2	ENSG00000168528.12	SERINC2	protein_coding	protein_coding	chr1
STRG.859.1	ENSG00000117614.10	SYF2	protein_coding	protein_coding	chr1
STRG.860.1	ENSG00000284602.1	ENSG00000284602	lncRNA	lncRNA	chr1
STRG.861.1	ENSG00000284657.1	ENSG00000284657	lncRNA	lncRNA	chr1
STRG.862.1	ENSG00000117616.18	RSRP1	protein_coding	protein_coding	chr1
STRG.863.1	ENSG00000272432.1	ENSG00000272432	lncRNA	lncRNA	chr1
STRG.867.1	ENSG00000224183.1	SDHDP6	processed_pseudogene	processed_pseudogene	chr1
STRG.868.1	ENSG00000183726.11	TMEM50A	protein_coding	protein_coding	chr1
STRG.870.1	ENSG00000238084.4	ENSG00000238084	processed_pseudogene	processed_pseudogene	chr1
STRG.872.1	ENSG00000204178.11	MACO1	protein_coding	protein_coding	chr1
STRG.878.1	ENSG00000157978.12	LDLRAP1	protein_coding	protein_coding	chr1
STRG.880.1	ENSG00000225643.1	ENSG00000225643	lncRNA	lncRNA	chr1
STRG.885.1	ENSG00000117643.15	MAN1C1	protein_coding	protein_coding	chr1
STRG.886.1	ENSG00000162430.18	SELENON	protein_coding	protein_coding	chr1
STRG.886.2	ENSG00000162430.18	SELENON	protein_coding	protein_coding	chr1
STRG.886.3	ENSG00000162430.18	SELENON	protein_coding	protein_coding	chr1
STRG.887.1	ENSG00000228172.5	ENSG00000228172	lncRNA	lncRNA	chr1
STRG.888.1	ENSG00000117640.18	MTFR1L	protein_coding	protein_coding	chr1
STRG.888.2	ENSG00000117640.18	MTFR1L	protein_coding	protein_coding	chr1
STRG.888.3	ENSG00000117640.18	MTFR1L	protein_coding	protein_coding	chr1
STRG.888.4	ENSG00000117640.18	MTFR1L	protein_coding	protein_coding	chr1
STRG.888.5	ENSG00000117640.18	MTFR1L	protein_coding	protein_coding	chr1
STRG.888.6	ENSG00000117640.18	MTFR1L	protein_coding	protein_coding	chr1
STRG.888.7	ENSG00000117640.18	MTFR1L	protein_coding	protein_coding	chr1
STRG.889.1	ENSG00000272478.1	ENSG00000272478	lncRNA	lncRNA	chr1
STRG.889.2	ENSG00000127423.11	AUNIP	protein_coding	protein_coding	chr1
STRG.889.3	ENSG00000127423.11	AUNIP	protein_coding	protein_coding	chr1
STRG.890.1	ENSG00000236528.3	ENSG00000236528	lncRNA	lncRNA	chr1
STRG.891.1	ENSG00000182749.6	PAQR7	protein_coding	protein_coding	chr1
STRG.891.2	ENSG00000182749.6	PAQR7	protein_coding	protein_coding	chr1
STRG.892.1	ENSG00000207302.1	Y_RNA	misc_RNA	misc_RNA	chr1
STRG.894.1	ENSG00000223624.1	ENSG00000223624	processed_pseudogene	processed_pseudogene	chr1
STRG.895.1	ENSG00000117632.23	STMN1	protein_coding	protein_coding	chr1
STRG.895.2	ENSG00000117632.23	STMN1	protein_coding	protein_coding	chr1
STRG.895.3	ENSG00000117632.23	STMN1	protein_coding	protein_coding	chr1
STRG.895.4	ENSG00000117632.23	STMN1	protein_coding	protein_coding	chr1
STRG.895.5	ENSG00000283938.1	MIR3917	miRNA	miRNA	chr1
STRG.896.1	ENSG00000158006.14	PAFAH2	protein_coding	protein_coding	chr1
STRG.896.2	ENSG00000158006.14	PAFAH2	protein_coding	protein_coding	chr1
STRG.899.1	ENSG00000158008.10	EXTL1	protein_coding	protein_coding	chr1
STRG.903.1	ENSG00000175087.10	PDIK1L	protein_coding	protein_coding	chr1
STRG.903.2	ENSG00000175087.10	PDIK1L	protein_coding	protein_coding	chr1
STRG.903.3	ENSG00000175087.10	PDIK1L	protein_coding	protein_coding	chr1
STRG.904.1	ENSG00000197245.6	FAM110D	protein_coding	protein_coding	chr1
STRG.905.1	ENSG00000142684.9	ZNF593	protein_coding	protein_coding	chr1
STRG.905.2	ENSG00000142684.9	ZNF593	protein_coding	protein_coding	chr1
STRG.914.1	ENSG00000130695.16	CEP85	protein_coding	protein_coding	chr1
STRG.914.2	ENSG00000130695.16	CEP85	protein_coding	protein_coding	chr1
STRG.915.1	ENSG00000142669.15	SH3BGRL3	protein_coding	protein_coding	chr1
STRG.915.2	ENSG00000142669.15	SH3BGRL3	protein_coding	protein_coding	chr1
STRG.916.1	ENSG00000158062.21	UBXN11	protein_coding	protein_coding	chr1
STRG.916.3	ENSG00000158062.21	UBXN11	protein_coding	protein_coding	chr1
STRG.916.4	ENSG00000158062.21	UBXN11	protein_coding	protein_coding	chr1
STRG.916.5	ENSG00000158062.21	UBXN11	protein_coding	protein_coding	chr1
STRG.917.1	ENSG00000169442.9	CD52	protein_coding	protein_coding	chr1
STRG.923.2	ENSG00000117682.18	DHDDS	protein_coding	protein_coding	chr1
STRG.923.3	ENSG00000117682.18	DHDDS	protein_coding	protein_coding	chr1
STRG.923.4	ENSG00000117682.18	DHDDS	protein_coding	protein_coding	chr1
STRG.923.5	ENSG00000117682.18	DHDDS	protein_coding	protein_coding	chr1
STRG.923.6	ENSG00000117682.18	DHDDS	protein_coding	protein_coding	chr1
STRG.923.7	ENSG00000117682.18	DHDDS	protein_coding	protein_coding	chr1
STRG.923.8	ENSG00000117682.18	DHDDS	protein_coding	protein_coding	chr1
STRG.924.1	ENSG00000223583.1	ENSG00000223583	processed_pseudogene	processed_pseudogene	chr1
STRG.925.1	ENSG00000198830.11	HMGN2	protein_coding	protein_coding	chr1
STRG.925.2	ENSG00000198830.11	HMGN2	protein_coding	protein_coding	chr1
STRG.934.1	ENSG00000117676.14	RPS6KA1	protein_coding	protein_coding	chr1
STRG.934.2	ENSG00000117676.14	RPS6KA1	protein_coding	protein_coding	chr1
STRG.935.1	ENSG00000238705.1	MIR1976	miRNA	miRNA	chr1
STRG.936.1	ENSG00000243905.3	RN7SL679P	misc_RNA	misc_RNA	chr1
STRG.937.1	ENSG00000252802.1	Y_RNA	misc_RNA	misc_RNA	chr1
STRG.938.1	ENSG00000289452.1	ENSG00000289452	lncRNA	lncRNA	chr1
STRG.941.1	ENSG00000260063.1	ENSG00000260063	lncRNA	lncRNA	chr1
STRG.942.1	ENSG00000290006.1	ENSG00000290006	lncRNA	lncRNA	chr1
STRG.943.1	ENSG00000117713.21	ARID1A	protein_coding	protein_coding	chr1
STRG.943.3	ENSG00000117713.21	ARID1A	protein_coding	protein_coding	chr1
STRG.944.1	ENSG00000060642.12	PIGV	protein_coding	protein_coding	chr1
STRG.944.2	ENSG00000060642.12	PIGV	protein_coding	protein_coding	chr1
STRG.944.3	ENSG00000060642.12	PIGV	protein_coding	protein_coding	chr1
STRG.944.4	ENSG00000060642.12	PIGV	protein_coding	protein_coding	chr1
STRG.944.5	ENSG00000060642.12	PIGV	protein_coding	protein_coding	chr1
STRG.944.6	ENSG00000060642.12	PIGV	protein_coding	protein_coding	chr1
STRG.944.10	ENSG00000060642.12	PIGV	protein_coding	protein_coding	chr1
STRG.944.11	ENSG00000060642.12	PIGV	protein_coding	protein_coding	chr1
STRG.944.12	ENSG00000060642.12	PIGV	protein_coding	protein_coding	chr1
STRG.944.13	ENSG00000060642.12	PIGV	protein_coding	protein_coding	chr1
STRG.949.1	ENSG00000241188.3	RN7SL165P	misc_RNA	misc_RNA	chr1
STRG.950.1	ENSG00000287810.1	ENSG00000287810	unprocessed_pseudogene	unprocessed_pseudogene	chr1
STRG.952.1	ENSG00000204160.12	ZDHHC18	protein_coding	protein_coding	chr1
STRG.953.1	ENSG00000175793.12	SFN	protein_coding	protein_coding	chr1
STRG.956.1	ENSG00000142751.15	GPN2	protein_coding	protein_coding	chr1
STRG.957.1	ENSG00000289554.1	ENSG00000289554	lncRNA	lncRNA	chr1
STRG.958.1	ENSG00000198746.13	GPATCH3	protein_coding	protein_coding	chr1
STRG.960.1	ENSG00000131910.5	NR0B2	protein_coding	protein_coding	chr1
STRG.961.1	ENSG00000090273.14	NUDC	protein_coding	protein_coding	chr1
STRG.963.1	ENSG00000224064.1	RPL32P6	processed_pseudogene	processed_pseudogene	chr1
STRG.964.1	ENSG00000253368.4	TRNP1	protein_coding	protein_coding	chr1
STRG.966.1	ENSG00000158246.8	TENT5B	protein_coding	protein_coding	chr1
STRG.971.1	ENSG00000090020.11	SLC9A1	protein_coding	protein_coding	chr1
STRG.971.2	ENSG00000090020.11	SLC9A1	protein_coding	protein_coding	chr1
STRG.973.1	ENSG00000214973.3	CHCHD3P3	processed_pseudogene	processed_pseudogene	chr1
STRG.974.1	ENSG00000225159.1	NPM1P39	processed_pseudogene	processed_pseudogene	chr1
STRG.976.1	ENSG00000142784.16	WDTC1	protein_coding	protein_coding	chr1
STRG.976.2	ENSG00000142784.16	WDTC1	protein_coding	protein_coding	chr1
STRG.979.1	ENSG00000186501.15	TMEM222	protein_coding	protein_coding	chr1
STRG.979.2	ENSG00000186501.15	TMEM222	protein_coding	protein_coding	chr1
STRG.979.5	ENSG00000186501.15	TMEM222	protein_coding	protein_coding	chr1
STRG.979.6	ENSG00000186501.15	TMEM222	protein_coding	protein_coding	chr1
STRG.981.3	ENSG00000142765.18	SYTL1	protein_coding	protein_coding	chr1
STRG.981.5	ENSG00000142765.18	SYTL1	protein_coding	protein_coding	chr1
STRG.982.3	ENSG00000142733.18	MAP3K6	protein_coding	protein_coding	chr1
STRG.982.4	ENSG00000142733.18	MAP3K6	protein_coding	protein_coding	chr1
STRG.984.1	ENSG00000181773.7	GPR3	protein_coding	protein_coding	chr1
STRG.985.1	ENSG00000158195.11	WASF2	protein_coding	protein_coding	chr1
STRG.989.1	ENSG00000126705.15	AHDC1	protein_coding	protein_coding	chr1
STRG.989.2	ENSG00000126705.15	AHDC1	protein_coding	protein_coding	chr1
STRG.989.3	ENSG00000126705.15	AHDC1	protein_coding	protein_coding	chr1
STRG.989.4	ENSG00000126705.15	AHDC1	protein_coding	protein_coding	chr1
STRG.989.5	ENSG00000126705.15	AHDC1	protein_coding	protein_coding	chr1
STRG.991.1	ENSG00000235912.1	ENSG00000235912	processed_pseudogene	processed_pseudogene	chr1
STRG.993.1	ENSG00000126709.16	IFI6	protein_coding	protein_coding	chr1
STRG.993.2	ENSG00000126709.16	IFI6	protein_coding	protein_coding	chr1
STRG.993.3	ENSG00000126709.16	IFI6	protein_coding	protein_coding	chr1
STRG.995.1	ENSG00000287244.1	ENSG00000287244	lncRNA	lncRNA	chr1
STRG.996.1	ENSG00000009780.16	FAM76A	protein_coding	protein_coding	chr1
STRG.996.2	ENSG00000009780.16	FAM76A	protein_coding	protein_coding	chr1
STRG.996.4	ENSG00000009780.16	FAM76A	protein_coding	protein_coding	chr1
STRG.997.1	ENSG00000231344.1	ENSG00000231344	processed_pseudogene	processed_pseudogene	chr1
STRG.998.1	ENSG00000230833.1	RPEP3	processed_pseudogene	processed_pseudogene	chr1
STRG.1000.1	ENSG00000117758.14	STX12	protein_coding	protein_coding	chr1
STRG.1001.1	ENSG00000269971.1	ENSG00000269971	lncRNA	lncRNA	chr1
STRG.1002.1	ENSG00000270031.1	ENSG00000270031	lncRNA	lncRNA	chr1
STRG.1003.1	ENSG00000223062.1	RNU6-1245P	snRNA	snRNA	chr1
STRG.1005.1	ENSG00000117751.18	PPP1R8	protein_coding	protein_coding	chr1
STRG.1005.2	ENSG00000117751.18	PPP1R8	protein_coding	protein_coding	chr1
STRG.1005.3	ENSG00000117751.18	PPP1R8	protein_coding	protein_coding	chr1
STRG.1006.1	ENSG00000252947.1	SCARNA1	scaRNA	scaRNA	chr1
STRG.1008.2	ENSG00000130775.16	THEMIS2	protein_coding	protein_coding	chr1
STRG.1008.3	ENSG00000130775.16	THEMIS2	protein_coding	protein_coding	chr1
STRG.1009.1	ENSG00000117748.10	RPA2	protein_coding	protein_coding	chr1
STRG.1009.2	ENSG00000117748.10	RPA2	protein_coding	protein_coding	chr1
STRG.1009.3	ENSG00000117748.10	RPA2	protein_coding	protein_coding	chr1
STRG.1010.1	ENSG00000130768.15	SMPDL3B	protein_coding	protein_coding	chr1
STRG.1010.3	ENSG00000130768.15	SMPDL3B	protein_coding	protein_coding	chr1
STRG.1010.4	ENSG00000158156.9	XKR8	protein_coding	protein_coding	chr1
STRG.1010.5	ENSG00000158156.9	XKR8	protein_coding	protein_coding	chr1
STRG.1011.1	ENSG00000158161.16	EYA3	protein_coding	protein_coding	chr1
STRG.1011.2	ENSG00000158161.16	EYA3	protein_coding	protein_coding	chr1
STRG.1011.3	ENSG00000158161.16	EYA3	protein_coding	protein_coding	chr1
STRG.1011.4	ENSG00000158161.16	EYA3	protein_coding	protein_coding	chr1
STRG.1012.1	ENSG00000238231.2	ENSG00000238231	processed_pseudogene	processed_pseudogene	chr1
STRG.1013.1	ENSG00000240750.3	RN7SL559P	misc_RNA	misc_RNA	chr1
STRG.1015.1	ENSG00000228589.3	SPCS2P4	processed_pseudogene	processed_pseudogene	chr1
STRG.1022.1	ENSG00000126698.11	DNAJC8	protein_coding	protein_coding	chr1
STRG.1024.1	ENSG00000290123.1	ENSG00000290123	lncRNA	lncRNA	chr1
STRG.1023.2	ENSG00000130770.18	ATP5IF1	protein_coding	protein_coding	chr1
STRG.1023.3	ENSG00000130770.18	ATP5IF1	protein_coding	protein_coding	chr1
STRG.1023.4	ENSG00000130770.18	ATP5IF1	protein_coding	protein_coding	chr1
STRG.1023.5	ENSG00000130770.18	ATP5IF1	protein_coding	protein_coding	chr1
STRG.1025.1	ENSG00000270605.1	ENSG00000270605	lncRNA	lncRNA	chr1
STRG.1026.1	ENSG00000271398.1	ENSG00000271398	lncRNA	lncRNA	chr1
STRG.1031.1	ENSG00000130766.5	SESN2	protein_coding	protein_coding	chr1
STRG.1034.1	ENSG00000130772.14	MED18	protein_coding	protein_coding	chr1
STRG.1039.3	ENSG00000204138.13	PHACTR4	protein_coding	protein_coding	chr1
STRG.1040.1	ENSG00000206779.1	Y_RNA	misc_RNA	misc_RNA	chr1
STRG.1039.5	ENSG00000204138.13	PHACTR4	protein_coding	protein_coding	chr1
STRG.1041.1	ENSG00000229820.2	ENSG00000229820	processed_pseudogene	processed_pseudogene	chr1
STRG.1042.1	ENSG00000221216.1	RNU6ATAC27P	snRNA	snRNA	chr1
STRG.1044.1	ENSG00000180198.17	RCC1	protein_coding	protein_coding	chr1
STRG.1044.2	ENSG00000242125.3	SNHG3	lncRNA	lncRNA	chr1
STRG.1044.3	ENSG00000180198.17	RCC1	protein_coding	protein_coding	chr1
STRG.1044.4	ENSG00000180198.17	RCC1	protein_coding	protein_coding	chr1
STRG.1044.5	ENSG00000180198.17	RCC1	protein_coding	protein_coding	chr1
STRG.1045.1	ENSG00000274266.1	SNORA73A	snoRNA	snoRNA	chr1
STRG.1046.1	ENSG00000200087.1	SNORA73B	snoRNA	snoRNA	chr1
STRG.1044.6	ENSG00000180198.17	RCC1	protein_coding	protein_coding	chr1
STRG.1044.7	ENSG00000180198.17	RCC1	protein_coding	protein_coding	chr1
STRG.1044.8	ENSG00000180198.17	RCC1	protein_coding	protein_coding	chr1
STRG.1047.1	ENSG00000279443.1	ENSG00000279443	TEC	TEC	chr1
STRG.1050.1	ENSG00000180098.9	TRNAU1AP	protein_coding	protein_coding	chr1
STRG.1051.1	ENSG00000197989.15	SNHG12	lncRNA	lncRNA	chr1
STRG.1051.2	ENSG00000197989.15	SNHG12	lncRNA	lncRNA	chr1
STRG.1051.3	ENSG00000197989.15	SNHG12	lncRNA	lncRNA	chr1
STRG.1051.4	ENSG00000197989.15	SNHG12	lncRNA	lncRNA	chr1
STRG.1052.1	ENSG00000221539.1	SNORD99	snoRNA	snoRNA	chr1
STRG.1051.6	ENSG00000197989.15	SNHG12	lncRNA	lncRNA	chr1
STRG.1053.1	ENSG00000278274.1	SNORA61	snoRNA	snoRNA	chr1
STRG.1051.7	ENSG00000273544.1	SNORA44	snoRNA	snoRNA	chr1
STRG.1051.8	ENSG00000274582.1	SNORA16A	snoRNA	snoRNA	chr1
STRG.1054.2	ENSG00000120656.14	TAF12	protein_coding	protein_coding	chr1
STRG.1054.3	ENSG00000120656.14	TAF12	protein_coding	protein_coding	chr1
STRG.1054.4	ENSG00000120656.14	TAF12	protein_coding	protein_coding	chr1
STRG.1054.5	ENSG00000120656.14	TAF12	protein_coding	protein_coding	chr1
STRG.1054.6	ENSG00000120656.14	TAF12	protein_coding	protein_coding	chr1
STRG.1054.7	ENSG00000120656.14	TAF12	protein_coding	protein_coding	chr1
STRG.1055.1	ENSG00000270103.3	ENSG00000270103	lncRNA	lncRNA	chr1
STRG.1055.2	ENSG00000274978.1	RNU11	snRNA	snRNA	chr1
STRG.1059.1	ENSG00000162419.13	GMEB1	protein_coding	protein_coding	chr1
STRG.1059.2	ENSG00000162419.13	GMEB1	protein_coding	protein_coding	chr1
STRG.1059.3	ENSG00000162419.13	GMEB1	protein_coding	protein_coding	chr1
STRG.1060.1	ENSG00000252777.1	ENSG00000252777	scaRNA	scaRNA	chr1
STRG.1063.1	ENSG00000289291.1	ENSG00000289291	lncRNA	lncRNA	chr1
STRG.1064.1	ENSG00000198492.16	YTHDF2	protein_coding	protein_coding	chr1
STRG.1064.2	ENSG00000198492.16	YTHDF2	protein_coding	protein_coding	chr1
STRG.1064.3	ENSG00000198492.16	YTHDF2	protein_coding	protein_coding	chr1
STRG.1067.1	ENSG00000116329.12	OPRD1	protein_coding	protein_coding	chr1
STRG.1069.1	ENSG00000199756.1	Y_RNA	misc_RNA	misc_RNA	chr1
STRG.1071.1	ENSG00000159023.23	EPB41	protein_coding	protein_coding	chr1
STRG.1071.2	ENSG00000159023.23	EPB41	protein_coding	protein_coding	chr1
STRG.1071.4	ENSG00000159023.23	EPB41	protein_coding	protein_coding	chr1
STRG.1071.5	ENSG00000159023.23	EPB41	protein_coding	protein_coding	chr1
STRG.1071.7	ENSG00000159023.23	EPB41	protein_coding	protein_coding	chr1
STRG.1072.1	ENSG00000225616.2	ENSG00000225616	processed_pseudogene	processed_pseudogene	chr1
STRG.1073.1	ENSG00000206704.1	Y_RNA	misc_RNA	misc_RNA	chr1
STRG.1074.1	ENSG00000277958.1	Metazoa_SRP	misc_RNA	misc_RNA	chr1
STRG.1075.1	ENSG00000253304.2	TMEM200B	protein_coding	protein_coding	chr1
STRG.1079.1	ENSG00000116350.18	SRSF4	protein_coding	protein_coding	chr1
STRG.1080.1	ENSG00000277916.1	ENSG00000277916	misc_RNA	misc_RNA	chr1
STRG.1082.1	ENSG00000116353.16	MECR	protein_coding	protein_coding	chr1
STRG.1082.2	ENSG00000116353.16	MECR	protein_coding	protein_coding	chr1
STRG.1083.1	ENSG00000060656.20	PTPRU	protein_coding	protein_coding	chr1
STRG.1083.2	ENSG00000060656.20	PTPRU	protein_coding	protein_coding	chr1
STRG.1083.3	ENSG00000060656.20	PTPRU	protein_coding	protein_coding	chr1
STRG.1086.1	ENSG00000121764.12	HCRTR1	protein_coding	protein_coding	chr1
STRG.1087.1	ENSG00000162517.13	PEF1	protein_coding	protein_coding	chr1
STRG.1093.2	ENSG00000121753.13	ADGRB2	protein_coding	protein_coding	chr1
STRG.1093.4	ENSG00000121753.13	ADGRB2	protein_coding	protein_coding	chr1
STRG.1093.5	ENSG00000121753.13	ADGRB2	protein_coding	protein_coding	chr1
STRG.1093.8	ENSG00000121753.13	ADGRB2	protein_coding	protein_coding	chr1
STRG.1094.1	ENSG00000266580.1	MIR4254	miRNA	miRNA	chr1
STRG.1101.1	ENSG00000184007.22	PTP4A2	protein_coding	protein_coding	chr1
STRG.1101.2	ENSG00000184007.22	PTP4A2	protein_coding	protein_coding	chr1
STRG.1101.3	ENSG00000184007.22	PTP4A2	protein_coding	protein_coding	chr1
STRG.1101.4	ENSG00000184007.22	PTP4A2	protein_coding	protein_coding	chr1
STRG.1101.5	ENSG00000288678.1	ENSG00000288678	protein_coding	protein_coding	chr1
STRG.1106.1	ENSG00000121774.18	KHDRBS1	protein_coding	protein_coding	chr1
STRG.1110.1	ENSG00000121775.18	TMEM39B	protein_coding	protein_coding	chr1
STRG.1111.1	ENSG00000266203.1	MIR5585	miRNA	miRNA	chr1
STRG.1112.1	ENSG00000025800.14	KPNA6	protein_coding	protein_coding	chr1
STRG.1113.1	ENSG00000084652.16	TXLNA	protein_coding	protein_coding	chr1
STRG.1113.2	ENSG00000084652.16	TXLNA	protein_coding	protein_coding	chr1
STRG.1114.1	ENSG00000160050.16	CCDC28B	protein_coding	protein_coding	chr1
STRG.1114.2	ENSG00000160050.16	CCDC28B	protein_coding	protein_coding	chr1
STRG.1114.3	ENSG00000160050.16	CCDC28B	protein_coding	protein_coding	chr1
STRG.1115.1	ENSG00000224066.1	ENSG00000224066	lncRNA	lncRNA	chr1
STRG.1115.2	ENSG00000224066.1	ENSG00000224066	lncRNA	lncRNA	chr1
STRG.1116.1	ENSG00000160051.12	IQCC	protein_coding	protein_coding	chr1
STRG.1117.8	ENSG00000160055.20	TMEM234	protein_coding	protein_coding	chr1
STRG.1117.9	ENSG00000160055.20	TMEM234	protein_coding	protein_coding	chr1
STRG.1117.10	ENSG00000160055.20	TMEM234	protein_coding	protein_coding	chr1
STRG.1118.1	ENSG00000084623.12	EIF3I	protein_coding	protein_coding	chr1
STRG.1118.2	ENSG00000084623.12	EIF3I	protein_coding	protein_coding	chr1
STRG.1118.3	ENSG00000084623.12	EIF3I	protein_coding	protein_coding	chr1
STRG.1118.4	ENSG00000084623.12	EIF3I	protein_coding	protein_coding	chr1
STRG.1118.5	ENSG00000084623.12	EIF3I	protein_coding	protein_coding	chr1
STRG.1118.6	ENSG00000084623.12	EIF3I	protein_coding	protein_coding	chr1
STRG.1118.7	ENSG00000084623.12	EIF3I	protein_coding	protein_coding	chr1
STRG.1118.8	ENSG00000084623.12	EIF3I	protein_coding	protein_coding	chr1
STRG.1118.9	ENSG00000084623.12	EIF3I	protein_coding	protein_coding	chr1
STRG.1118.10	ENSG00000084623.12	EIF3I	protein_coding	protein_coding	chr1
STRG.1118.11	ENSG00000084623.12	EIF3I	protein_coding	protein_coding	chr1
STRG.1120.1	ENSG00000290045.1	ENSG00000290045	lncRNA	lncRNA	chr1
STRG.1123.1	ENSG00000183615.6	FAM167B	protein_coding	protein_coding	chr1
STRG.1128.1	ENSG00000116478.12	HDAC1	protein_coding	protein_coding	chr1
STRG.1129.1	ENSG00000175130.7	MARCKSL1	protein_coding	protein_coding	chr1
STRG.1134.1	ENSG00000225828.2	FAM229A	protein_coding	protein_coding	chr1
STRG.1134.3	ENSG00000160058.19	BSDC1	protein_coding	protein_coding	chr1
STRG.1134.4	ENSG00000160058.19	BSDC1	protein_coding	protein_coding	chr1
STRG.1136.1	ENSG00000270850.1	ENSG00000270850	processed_pseudogene	processed_pseudogene	chr1
STRG.1137.2	ENSG00000273274.2	ZBTB8B	protein_coding	protein_coding	chr1
STRG.1149.1	ENSG00000160062.15	ZBTB8A	protein_coding	protein_coding	chr1
STRG.1149.2	ENSG00000160062.15	ZBTB8A	protein_coding	protein_coding	chr1
STRG.1152.1	ENSG00000176261.16	ZBTB8OS	protein_coding	protein_coding	chr1
STRG.1152.2	ENSG00000176261.16	ZBTB8OS	protein_coding	protein_coding	chr1
STRG.1152.3	ENSG00000176261.16	ZBTB8OS	protein_coding	protein_coding	chr1
STRG.1152.5	ENSG00000176261.16	ZBTB8OS	protein_coding	protein_coding	chr1
STRG.1152.6	ENSG00000176261.16	ZBTB8OS	protein_coding	protein_coding	chr1
STRG.1153.1	ENSG00000162521.19	RBBP4	protein_coding	protein_coding	chr1
STRG.1153.2	ENSG00000162521.19	RBBP4	protein_coding	protein_coding	chr1
STRG.1153.3	ENSG00000162521.19	RBBP4	protein_coding	protein_coding	chr1
STRG.1154.1	ENSG00000162520.15	SYNC	protein_coding	protein_coding	chr1
STRG.1154.2	ENSG00000162520.15	SYNC	protein_coding	protein_coding	chr1
STRG.1158.1	ENSG00000162522.11	KIAA1522	protein_coding	protein_coding	chr1
STRG.1158.2	ENSG00000162522.11	KIAA1522	protein_coding	protein_coding	chr1
STRG.1159.1	ENSG00000134684.13	YARS1	protein_coding	protein_coding	chr1
STRG.1159.2	ENSG00000134684.13	YARS1	protein_coding	protein_coding	chr1
STRG.1160.1	ENSG00000116497.18	S100PBP	protein_coding	protein_coding	chr1
STRG.1160.2	ENSG00000116497.18	S100PBP	protein_coding	protein_coding	chr1
STRG.1169.1	ENSG00000121900.19	TMEM54	protein_coding	protein_coding	chr1
STRG.1170.1	ENSG00000116514.17	RNF19B	protein_coding	protein_coding	chr1
STRG.1170.2	ENSG00000116514.17	RNF19B	protein_coding	protein_coding	chr1
STRG.1176.1	ENSG00000004455.18	AK2	protein_coding	protein_coding	chr1
STRG.1176.2	ENSG00000004455.18	AK2	protein_coding	protein_coding	chr1
STRG.1176.3	ENSG00000004455.18	AK2	protein_coding	protein_coding	chr1
STRG.1176.4	ENSG00000004455.18	AK2	protein_coding	protein_coding	chr1
STRG.1176.5	ENSG00000004455.18	AK2	protein_coding	protein_coding	chr1
STRG.1176.6	ENSG00000004455.18	AK2	protein_coding	protein_coding	chr1
STRG.1177.1	ENSG00000276645.1	Metazoa_SRP	misc_RNA	misc_RNA	chr1
STRG.1180.9	ENSG00000142920.17	AZIN2	protein_coding	protein_coding	chr1
STRG.1181.1	ENSG00000116525.14	TRIM62	protein_coding	protein_coding	chr1
STRG.1181.2	ENSG00000116525.14	TRIM62	protein_coding	protein_coding	chr1
STRG.1181.3	ENSG00000116525.14	TRIM62	protein_coding	protein_coding	chr1
STRG.1181.4	ENSG00000278997.1	ENSG00000278997	TEC	TEC	chr1
STRG.1181.5	ENSG00000116525.14	TRIM62	protein_coding	protein_coding	chr1
STRG.1183.1	ENSG00000279179.1	ENSG00000279179	TEC	TEC	chr1
STRG.1181.6	ENSG00000116525.14	TRIM62	protein_coding	protein_coding	chr1
STRG.1189.2	ENSG00000160094.15	ZNF362	protein_coding	protein_coding	chr1
STRG.1190.1	ENSG00000270115.1	ENSG00000270115	lncRNA	lncRNA	chr1
STRG.1189.3	ENSG00000160094.15	ZNF362	protein_coding	protein_coding	chr1
STRG.1193.1	ENSG00000134686.21	PHC2	protein_coding	protein_coding	chr1
STRG.1193.2	ENSG00000134686.21	PHC2	protein_coding	protein_coding	chr1
STRG.1193.3	ENSG00000134686.21	PHC2	protein_coding	protein_coding	chr1
STRG.1193.4	ENSG00000134686.21	PHC2	protein_coding	protein_coding	chr1
STRG.1193.5	ENSG00000134686.21	PHC2	protein_coding	protein_coding	chr1
STRG.1193.6	ENSG00000284154.1	MIR3605	miRNA	miRNA	chr1
STRG.1194.1	ENSG00000222112.1	RN7SKP16	misc_RNA	misc_RNA	chr1
STRG.1193.7	ENSG00000134686.21	PHC2	protein_coding	protein_coding	chr1
STRG.1198.4	ENSG00000121903.15	ZSCAN20	protein_coding	protein_coding	chr1
STRG.1198.5	ENSG00000121903.15	ZSCAN20	protein_coding	protein_coding	chr1
STRG.1198.6	ENSG00000121903.15	ZSCAN20	protein_coding	protein_coding	chr1
STRG.1212.1	ENSG00000163873.10	GRIK3	protein_coding	protein_coding	chr1
STRG.1212.2	ENSG00000163873.10	GRIK3	protein_coding	protein_coding	chr1
STRG.1213.1	ENSG00000215895.4	HSPA5P1	processed_pseudogene	processed_pseudogene	chr1
STRG.1215.1	ENSG00000233621.3	ZC3H12A-DT	lncRNA	lncRNA	chr1
STRG.1217.1	ENSG00000163874.11	ZC3H12A	protein_coding	protein_coding	chr1
STRG.1218.1	ENSG00000163875.16	MEAF6	protein_coding	protein_coding	chr1
STRG.1218.2	ENSG00000163875.16	MEAF6	protein_coding	protein_coding	chr1
STRG.1218.4	ENSG00000163875.16	MEAF6	protein_coding	protein_coding	chr1
STRG.1218.5	ENSG00000163875.16	MEAF6	protein_coding	protein_coding	chr1
STRG.1219.1	ENSG00000263675.1	MIR5581	miRNA	miRNA	chr1
STRG.1221.1	ENSG00000163877.11	SNIP1	protein_coding	protein_coding	chr1
STRG.1222.1	ENSG00000232273.1	FTH1P1	processed_pseudogene	processed_pseudogene	chr1
STRG.1224.1	ENSG00000237749.4	ENSG00000237749	processed_pseudogene	processed_pseudogene	chr1
STRG.1225.2	ENSG00000163879.11	DNALI1	protein_coding	protein_coding	chr1
STRG.1225.3	ENSG00000163879.11	DNALI1	protein_coding	protein_coding	chr1
STRG.1227.1	ENSG00000134697.13	GNL2	protein_coding	protein_coding	chr1
STRG.1230.1	ENSG00000116922.15	C1orf109	protein_coding	protein_coding	chr1
STRG.1230.6	ENSG00000116922.15	C1orf109	protein_coding	protein_coding	chr1
STRG.1230.7	ENSG00000116922.15	C1orf109	protein_coding	protein_coding	chr1
STRG.1231.1	ENSG00000134690.11	CDCA8	protein_coding	protein_coding	chr1
STRG.1231.2	ENSG00000134690.11	CDCA8	protein_coding	protein_coding	chr1
STRG.1233.1	ENSG00000227416.2	ENSG00000227416	processed_pseudogene	processed_pseudogene	chr1
STRG.1235.2	ENSG00000185090.15	MANEAL	protein_coding	protein_coding	chr1
STRG.1235.3	ENSG00000185090.15	MANEAL	protein_coding	protein_coding	chr1
STRG.1235.4	ENSG00000185090.15	MANEAL	protein_coding	protein_coding	chr1
STRG.1236.1	ENSG00000196449.4	YRDC	protein_coding	protein_coding	chr1
STRG.1235.5	ENSG00000197982.14	C1orf122	protein_coding	protein_coding	chr1
STRG.1235.6	ENSG00000197982.14	C1orf122	protein_coding	protein_coding	chr1
STRG.1235.7	ENSG00000197982.14	C1orf122	protein_coding	protein_coding	chr1
STRG.1237.1	ENSG00000188786.10	MTF1	protein_coding	protein_coding	chr1
STRG.1239.1	ENSG00000235673.1	ENSG00000235673	processed_pseudogene	processed_pseudogene	chr1
STRG.1240.1	ENSG00000204084.13	INPP5B	protein_coding	protein_coding	chr1
STRG.1240.2	ENSG00000204084.13	INPP5B	protein_coding	protein_coding	chr1
STRG.1241.1	ENSG00000252448.1	SNORA63	snoRNA	snoRNA	chr1
STRG.1240.3	ENSG00000204084.13	INPP5B	protein_coding	protein_coding	chr1
STRG.1243.1	ENSG00000183431.12	SF3A3	protein_coding	protein_coding	chr1
STRG.1244.1	ENSG00000212541.1	RNU6-510P	snRNA	snRNA	chr1
STRG.1245.1	ENSG00000183386.10	FHL3	protein_coding	protein_coding	chr1
STRG.1247.1	ENSG00000183520.12	UTP11	protein_coding	protein_coding	chr1
STRG.1250.1	ENSG00000185668.8	POU3F1	protein_coding	protein_coding	chr1
STRG.1251.2	ENSG00000224592.5	MIR3659HG	lncRNA	lncRNA	chr1
STRG.1252.1	ENSG00000265596.1	MIR3659	miRNA	miRNA	chr1
STRG.1259.1	ENSG00000163866.9	SMIM12	protein_coding	protein_coding	chr1
STRG.1259.2	ENSG00000163866.9	SMIM12	protein_coding	protein_coding	chr1
STRG.1260.1	ENSG00000116544.12	DLGAP3	protein_coding	protein_coding	chr1
STRG.1260.2	ENSG00000116544.12	DLGAP3	protein_coding	protein_coding	chr1
STRG.1262.1	ENSG00000241014.2	GPR199P	transcribed_unitary_pseudogene	transcribed_unitary_pseudogene	chr1
STRG.1263.1	ENSG00000243749.2	TMEM35B	protein_coding	protein_coding	chr1
STRG.1263.2	ENSG00000271741.1	ENSG00000271741	protein_coding	nonsense_mediated_decay	chr1
STRG.1263.4	ENSG00000163867.17	ZMYM6	protein_coding	protein_coding	chr1
STRG.1263.6	ENSG00000163867.17	ZMYM6	protein_coding	protein_coding	chr1
STRG.1263.7	ENSG00000163867.17	ZMYM6	protein_coding	protein_coding	chr1
STRG.1265.1	ENSG00000197056.11	ZMYM1	protein_coding	protein_coding	chr1
STRG.1266.1	ENSG00000228348.1	EFCAB14P1	processed_pseudogene	processed_pseudogene	chr1
STRG.1268.4	ENSG00000116560.12	SFPQ	protein_coding	protein_coding	chr1
STRG.1268.5	ENSG00000116560.12	SFPQ	protein_coding	protein_coding	chr1
STRG.1269.1	ENSG00000201868.1	Y_RNA	misc_RNA	misc_RNA	chr1
STRG.1272.1	ENSG00000146463.12	ZMYM4	protein_coding	protein_coding	chr1
STRG.1273.1	ENSG00000201542.1	SNORA62	snoRNA	snoRNA	chr1
STRG.1274.1	ENSG00000229994.1	RPL5P4	processed_pseudogene	processed_pseudogene	chr1
STRG.1277.1	ENSG00000142687.19	KIAA0319L	protein_coding	protein_coding	chr1
STRG.1277.3	ENSG00000142687.19	KIAA0319L	protein_coding	protein_coding	chr1
STRG.1277.4	ENSG00000142687.19	KIAA0319L	protein_coding	protein_coding	chr1
STRG.1278.1	ENSG00000020129.16	NCDN	protein_coding	protein_coding	chr1
STRG.1278.2	ENSG00000020129.16	NCDN	protein_coding	protein_coding	chr1
STRG.1278.3	ENSG00000020129.16	NCDN	protein_coding	protein_coding	chr1
STRG.1283.1	ENSG00000126067.12	PSMB2	protein_coding	protein_coding	chr1
STRG.1283.2	ENSG00000126067.12	PSMB2	protein_coding	protein_coding	chr1
STRG.1285.1	ENSG00000142686.8	C1orf216	protein_coding	protein_coding	chr1
STRG.1286.1	ENSG00000092853.14	CLSPN	protein_coding	protein_coding	chr1
STRG.1286.4	ENSG00000092853.14	CLSPN	protein_coding	protein_coding	chr1
STRG.1286.5	ENSG00000092853.14	CLSPN	protein_coding	protein_coding	chr1
STRG.1286.6	ENSG00000092853.14	CLSPN	protein_coding	protein_coding	chr1
STRG.1287.1	ENSG00000232335.1	ENSG00000232335	lncRNA	lncRNA	chr1
STRG.1294.2	ENSG00000134698.11	AGO4	protein_coding	protein_coding	chr1
STRG.1296.1	ENSG00000092847.14	AGO1	protein_coding	protein_coding	chr1
STRG.1296.2	ENSG00000092847.14	AGO1	protein_coding	protein_coding	chr1
STRG.1296.3	ENSG00000092847.14	AGO1	protein_coding	protein_coding	chr1
STRG.1297.3	ENSG00000126070.20	AGO3	protein_coding	protein_coding	chr1
STRG.1297.5	ENSG00000126070.20	AGO3	protein_coding	protein_coding	chr1
STRG.1300.1	ENSG00000092850.12	TEKT2	protein_coding	protein_coding	chr1
STRG.1301.1	ENSG00000116863.11	ADPRS	protein_coding	protein_coding	chr1
STRG.1303.1	ENSG00000054116.12	TRAPPC3	protein_coding	protein_coding	chr1
STRG.1303.2	ENSG00000054116.12	TRAPPC3	protein_coding	protein_coding	chr1
STRG.1303.3	ENSG00000054116.12	TRAPPC3	protein_coding	protein_coding	chr1
STRG.1303.4	ENSG00000054116.12	TRAPPC3	protein_coding	protein_coding	chr1
STRG.1303.5	ENSG00000054116.12	TRAPPC3	protein_coding	protein_coding	chr1
STRG.1303.6	ENSG00000054116.12	TRAPPC3	protein_coding	protein_coding	chr1
STRG.1304.1	ENSG00000116871.16	MAP7D1	protein_coding	protein_coding	chr1
STRG.1304.2	ENSG00000116871.16	MAP7D1	protein_coding	protein_coding	chr1
STRG.1304.3	ENSG00000116871.16	MAP7D1	protein_coding	protein_coding	chr1
STRG.1304.5	ENSG00000116871.16	MAP7D1	protein_coding	protein_coding	chr1
STRG.1310.2	ENSG00000054118.15	THRAP3	protein_coding	protein_coding	chr1
STRG.1310.3	ENSG00000054118.15	THRAP3	protein_coding	protein_coding	chr1
STRG.1311.2	ENSG00000214193.11	SH3D21	protein_coding	protein_coding	chr1
STRG.1313.1	ENSG00000142694.7	EVA1B	protein_coding	protein_coding	chr1
STRG.1314.1	ENSG00000196182.11	STK40	protein_coding	protein_coding	chr1
STRG.1314.2	ENSG00000196182.11	STK40	protein_coding	protein_coding	chr1
STRG.1314.3	ENSG00000196182.11	STK40	protein_coding	protein_coding	chr1
STRG.1314.4	ENSG00000196182.11	STK40	protein_coding	protein_coding	chr1
STRG.1317.1	ENSG00000181817.6	LSM10	protein_coding	protein_coding	chr1
STRG.1319.1	ENSG00000222821.1	RNU4-27P	snRNA	snRNA	chr1
STRG.1324.1	ENSG00000116885.18	OSCP1	protein_coding	protein_coding	chr1
STRG.1325.1	ENSG00000201448.1	SNORA63C	snoRNA	snoRNA	chr1
STRG.1324.2	ENSG00000116885.18	OSCP1	protein_coding	protein_coding	chr1
STRG.1328.1	ENSG00000116898.12	MRPS15	protein_coding	protein_coding	chr1
STRG.1331.1	ENSG00000179862.7	CITED4	protein_coding	protein_coding	chr1
STRG.1333.1	ENSG00000171793.17	CTPS1	protein_coding	protein_coding	chr1
STRG.1333.2	ENSG00000171793.17	CTPS1	protein_coding	protein_coding	chr1
STRG.1333.3	ENSG00000171793.17	CTPS1	protein_coding	protein_coding	chr1
STRG.1333.4	ENSG00000171793.17	CTPS1	protein_coding	protein_coding	chr1
STRG.1333.5	ENSG00000171793.17	CTPS1	protein_coding	protein_coding	chr1
STRG.1333.6	ENSG00000171793.17	CTPS1	protein_coding	protein_coding	chr1
STRG.1333.7	ENSG00000171793.17	CTPS1	protein_coding	protein_coding	chr1
STRG.1334.2	ENSG00000010803.17	SCMH1	protein_coding	protein_coding	chr1
STRG.1334.3	ENSG00000010803.17	SCMH1	protein_coding	protein_coding	chr1
STRG.1334.4	ENSG00000010803.17	SCMH1	protein_coding	protein_coding	chr1
STRG.1334.6	ENSG00000010803.17	SCMH1	protein_coding	protein_coding	chr1
STRG.1334.8	ENSG00000010803.17	SCMH1	protein_coding	protein_coding	chr1
STRG.1334.14	ENSG00000010803.17	SCMH1	protein_coding	protein_coding	chr1
STRG.1335.1	ENSG00000215893.3	RPL23AP17	processed_pseudogene	processed_pseudogene	chr1
STRG.1337.1	ENSG00000213987.4	RPL36AP9	processed_pseudogene	processed_pseudogene	chr1
STRG.1339.1	ENSG00000204060.8	FOXO6	protein_coding	protein_coding	chr1
STRG.1341.1	ENSG00000127124.16	HIVEP3	protein_coding	protein_coding	chr1
STRG.1341.2	ENSG00000127124.16	HIVEP3	protein_coding	protein_coding	chr1
STRG.1341.3	ENSG00000127124.16	HIVEP3	protein_coding	protein_coding	chr1
STRG.1342.1	ENSG00000230638.4	ENSG00000230638	processed_pseudogene	processed_pseudogene	chr1
STRG.1364.1	ENSG00000116954.8	RRAGC	protein_coding	protein_coding	chr1
STRG.1365.2	ENSG00000228436.4	RRAGC-DT	lncRNA	lncRNA	chr1
STRG.1365.4	ENSG00000228436.4	RRAGC-DT	lncRNA	lncRNA	chr1
STRG.1366.1	ENSG00000214114.9	MYCBP	protein_coding	protein_coding	chr1
STRG.1366.2	ENSG00000214114.9	MYCBP	protein_coding	protein_coding	chr1
STRG.1377.1	ENSG00000199963.1	RNU6-605P	snRNA	snRNA	chr1
STRG.1379.1	ENSG00000174574.16	AKIRIN1	protein_coding	protein_coding	chr1
STRG.1379.2	ENSG00000174574.16	AKIRIN1	protein_coding	protein_coding	chr1
STRG.1382.1	ENSG00000168653.11	NDUFS5	protein_coding	protein_coding	chr1
STRG.1382.2	ENSG00000168653.11	NDUFS5	protein_coding	protein_coding	chr1
STRG.1389.2	ENSG00000127603.32	MACF1	protein_coding	protein_coding	chr1
STRG.1389.3	ENSG00000127603.32	MACF1	protein_coding	protein_coding	chr1
STRG.1389.6	ENSG00000127603.32	MACF1	protein_coding	protein_coding	chr1
STRG.1389.7	ENSG00000127603.32	MACF1	protein_coding	protein_coding	chr1
STRG.1395.3	ENSG00000183682.8	BMP8A	protein_coding	protein_coding	chr1
STRG.1396.1	ENSG00000237624.1	OXCT2P1	unprocessed_pseudogene	unprocessed_pseudogene	chr1
STRG.1397.1	ENSG00000291129.1	PPIEL	lncRNA	lncRNA	chr1
STRG.1397.2	ENSG00000291129.1	PPIEL	lncRNA	lncRNA	chr1
STRG.1398.1	ENSG00000090621.15	PABPC4	protein_coding	protein_coding	chr1
STRG.1398.2	ENSG00000090621.15	PABPC4	protein_coding	protein_coding	chr1
STRG.1398.3	ENSG00000090621.15	PABPC4	protein_coding	protein_coding	chr1
STRG.1398.4	ENSG00000090621.15	PABPC4	protein_coding	protein_coding	chr1
STRG.1398.5	ENSG00000090621.15	PABPC4	protein_coding	protein_coding	chr1
STRG.1398.6	ENSG00000090621.15	PABPC4	protein_coding	protein_coding	chr1
STRG.1399.1	ENSG00000201457.1	SNORA55	snoRNA	snoRNA	chr1
STRG.1402.2	ENSG00000163909.8	HEYL	protein_coding	protein_coding	chr1
STRG.1403.1	ENSG00000225903.1	ENSG00000225903	lncRNA	lncRNA	chr1
STRG.1404.1	ENSG00000116981.4	NT5C1A	protein_coding	protein_coding	chr1
STRG.1405.1	ENSG00000116983.13	HPCAL4	protein_coding	protein_coding	chr1
STRG.1405.2	ENSG00000116983.13	HPCAL4	protein_coding	protein_coding	chr1
STRG.1405.3	ENSG00000116983.13	HPCAL4	protein_coding	protein_coding	chr1
STRG.1406.1	ENSG00000084072.17	PPIE	protein_coding	protein_coding	chr1
STRG.1406.3	ENSG00000084072.17	PPIE	protein_coding	protein_coding	chr1
STRG.1406.4	ENSG00000084072.17	PPIE	protein_coding	protein_coding	chr1
STRG.1406.5	ENSG00000084072.17	PPIE	protein_coding	protein_coding	chr1
STRG.1407.1	ENSG00000116985.12	BMP8B	protein_coding	protein_coding	chr1
STRG.1407.3	ENSG00000198754.5	OXCT2	protein_coding	protein_coding	chr1
STRG.1408.1	ENSG00000261798.1	ENSG00000261798	lncRNA	lncRNA	chr1
STRG.1410.2	ENSG00000284719.3	ENSG00000284719	lncRNA	lncRNA	chr1
STRG.1410.3	ENSG00000284719.3	ENSG00000284719	lncRNA	lncRNA	chr1
STRG.1410.4	ENSG00000284719.3	ENSG00000284719	lncRNA	lncRNA	chr1
STRG.1410.6	ENSG00000284719.3	ENSG00000284719	lncRNA	lncRNA	chr1
STRG.1412.1	ENSG00000043514.17	TRIT1	protein_coding	protein_coding	chr1
STRG.1412.4	ENSG00000043514.17	TRIT1	protein_coding	protein_coding	chr1
STRG.1413.1	ENSG00000202222.1	Y_RNA	misc_RNA	misc_RNA	chr1
STRG.1415.1	ENSG00000116990.11	MYCL	protein_coding	protein_coding	chr1
STRG.1415.2	ENSG00000116990.11	MYCL	protein_coding	protein_coding	chr1
STRG.1415.3	ENSG00000116990.11	MYCL	protein_coding	protein_coding	chr1
STRG.1416.1	ENSG00000168389.18	MFSD2A	protein_coding	protein_coding	chr1
STRG.1417.1	ENSG00000228477.1	ENSG00000228477	processed_pseudogene	processed_pseudogene	chr1
STRG.1420.1	ENSG00000131236.18	CAP1	protein_coding	protein_coding	chr1
STRG.1420.2	ENSG00000131236.18	CAP1	protein_coding	protein_coding	chr1
STRG.1420.3	ENSG00000131236.18	CAP1	protein_coding	protein_coding	chr1
STRG.1420.4	ENSG00000131236.18	CAP1	protein_coding	protein_coding	chr1
STRG.1420.5	ENSG00000131236.18	CAP1	protein_coding	protein_coding	chr1
STRG.1420.6	ENSG00000131236.18	CAP1	protein_coding	protein_coding	chr1
STRG.1421.1	ENSG00000131238.18	PPT1	protein_coding	protein_coding	chr1
STRG.1421.2	ENSG00000131238.18	PPT1	protein_coding	protein_coding	chr1
STRG.1421.3	ENSG00000131238.18	PPT1	protein_coding	protein_coding	chr1
STRG.1422.1	ENSG00000117000.9	RLF	protein_coding	protein_coding	chr1
STRG.1423.1	ENSG00000207508.1	RNU6-1237P	snRNA	snRNA	chr1
STRG.1426.1	ENSG00000259943.2	ZMPSTE24-DT	lncRNA	lncRNA	chr1
STRG.1427.1	ENSG00000084073.10	ZMPSTE24	protein_coding	protein_coding	chr1
STRG.1429.1	ENSG00000227311.3	ENSG00000227311	processed_pseudogene	processed_pseudogene	chr1
STRG.1430.1	ENSG00000213172.3	ENSG00000213172	processed_pseudogene	processed_pseudogene	chr1
STRG.1432.1	ENSG00000084070.12	SMAP2	protein_coding	protein_coding	chr1
STRG.1435.1	ENSG00000187801.15	ZFP69B	protein_coding	protein_coding	chr1
STRG.1435.2	ENSG00000187801.15	ZFP69B	protein_coding	protein_coding	chr1
STRG.1435.3	ENSG00000187801.15	ZFP69B	protein_coding	protein_coding	chr1
STRG.1435.4	ENSG00000260920.2	ENSG00000260920	lncRNA	lncRNA	chr1
STRG.1436.4	ENSG00000187815.10	ZFP69	protein_coding	protein_coding	chr1
STRG.1436.5	ENSG00000187815.10	ZFP69	protein_coding	protein_coding	chr1
STRG.1437.2	ENSG00000238287.1	EXO5-DT	lncRNA	lncRNA	chr1
STRG.1438.1	ENSG00000164002.12	EXO5	protein_coding	protein_coding	chr1
STRG.1438.2	ENSG00000164002.12	EXO5	protein_coding	protein_coding	chr1
STRG.1438.5	ENSG00000164002.12	EXO5	protein_coding	protein_coding	chr1
STRG.1438.6	ENSG00000164002.12	EXO5	protein_coding	protein_coding	chr1
STRG.1439.1	ENSG00000227278.1	ENSG00000227278	lncRNA	lncRNA	chr1
STRG.1441.1	ENSG00000117010.17	ZNF684	protein_coding	protein_coding	chr1
STRG.1441.2	ENSG00000117010.17	ZNF684	protein_coding	protein_coding	chr1
STRG.1441.3	ENSG00000117010.17	ZNF684	protein_coding	protein_coding	chr1
STRG.1442.1	ENSG00000236505.1	ENSG00000236505	unprocessed_pseudogene	unprocessed_pseudogene	chr1
STRG.1445.1	ENSG00000117016.10	RIMS3	protein_coding	protein_coding	chr1
STRG.1445.2	ENSG00000117016.10	RIMS3	protein_coding	protein_coding	chr1
STRG.1447.1	ENSG00000272145.2	NFYC-AS1	lncRNA	lncRNA	chr1
STRG.1448.1	ENSG00000066136.21	NFYC	protein_coding	protein_coding	chr1
STRG.1448.2	ENSG00000066136.21	NFYC	protein_coding	protein_coding	chr1
STRG.1448.3	ENSG00000066136.21	NFYC	protein_coding	protein_coding	chr1
STRG.1448.4	ENSG00000066136.21	NFYC	protein_coding	protein_coding	chr1
STRG.1448.5	ENSG00000066136.21	NFYC	protein_coding	protein_coding	chr1
STRG.1448.6	ENSG00000066136.21	NFYC	protein_coding	protein_coding	chr1
STRG.1448.7	ENSG00000066136.21	NFYC	protein_coding	protein_coding	chr1
STRG.1449.1	ENSG00000198974.3	MIR30E	miRNA	miRNA	chr1
STRG.1450.1	ENSG00000207962.1	MIR30C1	miRNA	miRNA	chr1
STRG.1453.1	ENSG00000117013.17	KCNQ4	protein_coding	protein_coding	chr1
STRG.1454.1	ENSG00000264582.2	RN7SL326P	misc_RNA	misc_RNA	chr1
STRG.1457.1	ENSG00000198815.9	FOXJ3	protein_coding	protein_coding	chr1
STRG.1457.2	ENSG00000198815.9	FOXJ3	protein_coding	protein_coding	chr1
STRG.1457.3	ENSG00000198815.9	FOXJ3	protein_coding	protein_coding	chr1
STRG.1457.4	ENSG00000198815.9	FOXJ3	protein_coding	protein_coding	chr1
STRG.1460.2	ENSG00000177181.15	RIMKLA	protein_coding	protein_coding	chr1
STRG.1461.1	ENSG00000066185.13	ZMYND12	protein_coding	protein_coding	chr1
STRG.1462.1	ENSG00000127125.9	PPCS	protein_coding	protein_coding	chr1
STRG.1462.2	ENSG00000127125.9	PPCS	protein_coding	protein_coding	chr1
STRG.1462.3	ENSG00000127125.9	PPCS	protein_coding	protein_coding	chr1
STRG.1462.4	ENSG00000127125.9	PPCS	protein_coding	protein_coding	chr1
STRG.1464.1	ENSG00000186409.19	CCDC30	protein_coding	protein_coding	chr1
STRG.1464.2	ENSG00000186409.19	CCDC30	protein_coding	protein_coding	chr1
STRG.1464.3	ENSG00000186409.19	CCDC30	protein_coding	protein_coding	chr1
STRG.1464.4	ENSG00000186409.19	CCDC30	protein_coding	protein_coding	chr1
STRG.1464.5	ENSG00000186409.19	CCDC30	protein_coding	protein_coding	chr1
STRG.1464.6	ENSG00000186409.19	CCDC30	protein_coding	protein_coding	chr1
STRG.1464.7	ENSG00000186409.19	CCDC30	protein_coding	protein_coding	chr1
STRG.1464.8	ENSG00000186409.19	CCDC30	protein_coding	protein_coding	chr1
STRG.1467.1	ENSG00000230116.1	RPS3AP11	processed_pseudogene	processed_pseudogene	chr1
STRG.1469.1	ENSG00000236876.3	TMSB4XP1	processed_pseudogene	processed_pseudogene	chr1
STRG.1474.1	ENSG00000200254.1	RNU6-536P	snRNA	snRNA	chr1
STRG.1475.1	ENSG00000236180.2	ENSG00000236180	processed_pseudogene	processed_pseudogene	chr1
STRG.1479.1	ENSG00000171960.12	PPIH	protein_coding	protein_coding	chr1
STRG.1479.2	ENSG00000171960.12	PPIH	protein_coding	protein_coding	chr1
STRG.1479.3	ENSG00000171960.12	PPIH	protein_coding	protein_coding	chr1
STRG.1479.4	ENSG00000171960.12	PPIH	protein_coding	protein_coding	chr1
STRG.1479.5	ENSG00000171960.12	PPIH	protein_coding	protein_coding	chr1
STRG.1479.6	ENSG00000171960.12	PPIH	protein_coding	protein_coding	chr1
STRG.1479.7	ENSG00000171960.12	PPIH	protein_coding	protein_coding	chr1
STRG.1479.8	ENSG00000171960.12	PPIH	protein_coding	protein_coding	chr1
STRG.1479.9	ENSG00000171960.12	PPIH	protein_coding	protein_coding	chr1
STRG.1480.1	ENSG00000234917.2	ENSG00000234917	lncRNA	lncRNA	chr1
STRG.1481.1	ENSG00000065978.19	YBX1	protein_coding	protein_coding	chr1
STRG.1485.1	ENSG00000117385.16	P3H1	protein_coding	protein_coding	chr1
STRG.1485.2	ENSG00000117385.16	P3H1	protein_coding	protein_coding	chr1
STRG.1485.3	ENSG00000117385.16	P3H1	protein_coding	protein_coding	chr1
STRG.1486.2	ENSG00000164008.17	C1orf50	protein_coding	protein_coding	chr1
STRG.1486.6	ENSG00000283580.4	ENSG00000283580	protein_coding	nonsense_mediated_decay	chr1
STRG.1489.1	ENSG00000177868.12	SVBP	protein_coding	protein_coding	chr1
STRG.1489.2	ENSG00000177868.12	SVBP	protein_coding	protein_coding	chr1
STRG.1490.1	ENSG00000164010.15	ERMAP	protein_coding	protein_coding	chr1
STRG.1490.2	ENSG00000164010.15	ERMAP	protein_coding	protein_coding	chr1
STRG.1492.1	ENSG00000228192.10	ZNF691-DT	lncRNA	lncRNA	chr1
STRG.1493.2	ENSG00000164011.18	ZNF691	protein_coding	protein_coding	chr1
STRG.1493.3	ENSG00000164011.18	ZNF691	protein_coding	protein_coding	chr1
STRG.1493.4	ENSG00000164011.18	ZNF691	protein_coding	protein_coding	chr1
STRG.1497.1	ENSG00000288955.1	ENSG00000288955	lncRNA	lncRNA	chr1
STRG.1498.1	ENSG00000117394.24	SLC2A1	protein_coding	protein_coding	chr1
STRG.1499.1	ENSG00000284138.1	ATP6V0CP4	processed_pseudogene	processed_pseudogene	chr1
STRG.1500.1	ENSG00000227533.7	SLC2A1-DT	lncRNA	lncRNA	chr1
STRG.1501.1	ENSG00000207256.1	RNU6-880P	snRNA	snRNA	chr1
STRG.1507.3	ENSG00000269113.4	TRABD2B	protein_coding	protein_coding	chr1
STRG.1517.1	ENSG00000272491.1	ENSG00000272491	lncRNA	lncRNA	chr1
STRG.1523.2	ENSG00000132122.12	SPATA6	protein_coding	protein_coding	chr1
STRG.1523.3	ENSG00000132122.12	SPATA6	protein_coding	protein_coding	chr1
STRG.1523.4	ENSG00000132122.12	SPATA6	protein_coding	protein_coding	chr1
STRG.1524.1	ENSG00000224986.2	PPP1R8P1	processed_pseudogene	processed_pseudogene	chr1
STRG.1525.1	ENSG00000235105.1	ENSG00000235105	processed_pseudogene	processed_pseudogene	chr1
STRG.1526.2	ENSG00000162373.13	BEND5	protein_coding	protein_coding	chr1
STRG.1529.1	ENSG00000237478.2	ENSG00000237478	processed_pseudogene	processed_pseudogene	chr1
STRG.1534.1	ENSG00000117395.13	EBNA1BP2	protein_coding	protein_coding	chr1
STRG.1534.2	ENSG00000117395.13	EBNA1BP2	protein_coding	protein_coding	chr1
STRG.1535.1	ENSG00000284410.1	MIR6733	miRNA	miRNA	chr1
STRG.1542.1	ENSG00000287113.1	ENSG00000287113	lncRNA	lncRNA	chr1
STRG.1546.2	ENSG00000234694.2	CDC20-DT	lncRNA	lncRNA	chr1
STRG.1547.1	ENSG00000117399.14	CDC20	protein_coding	protein_coding	chr1
STRG.1547.2	ENSG00000117399.14	CDC20	protein_coding	protein_coding	chr1
STRG.1548.1	ENSG00000066322.15	ELOVL1	protein_coding	protein_coding	chr1
STRG.1548.2	ENSG00000066322.15	ELOVL1	protein_coding	protein_coding	chr1
STRG.1548.3	ENSG00000066322.15	ELOVL1	protein_coding	protein_coding	chr1
STRG.1549.1	ENSG00000283836.1	MIR6734	miRNA	miRNA	chr1
STRG.1550.1	ENSG00000288772.2	ENSG00000288772	lncRNA	lncRNA	chr1
STRG.1553.1	ENSG00000159479.17	MED8	protein_coding	protein_coding	chr1
STRG.1553.2	ENSG00000159479.17	MED8	protein_coding	protein_coding	chr1
STRG.1553.3	ENSG00000159479.17	MED8	protein_coding	protein_coding	chr1
STRG.1554.1	ENSG00000198198.17	SZT2	protein_coding	protein_coding	chr1
STRG.1554.4	ENSG00000198198.17	SZT2	protein_coding	protein_coding	chr1
STRG.1555.1	ENSG00000229372.1	SZT2-AS1	lncRNA	lncRNA	chr1
STRG.1556.1	ENSG00000178922.18	HYI	protein_coding	protein_coding	chr1
STRG.1556.2	ENSG00000178922.18	HYI	protein_coding	protein_coding	chr1
STRG.1556.3	ENSG00000178922.18	HYI	protein_coding	protein_coding	chr1
STRG.1556.4	ENSG00000178922.18	HYI	protein_coding	protein_coding	chr1
STRG.1558.1	ENSG00000142949.17	PTPRF	protein_coding	protein_coding	chr1
STRG.1558.2	ENSG00000142949.17	PTPRF	protein_coding	protein_coding	chr1
STRG.1558.3	ENSG00000142949.17	PTPRF	protein_coding	protein_coding	chr1
STRG.1562.1	ENSG00000066135.13	KDM4A	protein_coding	protein_coding	chr1
STRG.1563.1	ENSG00000236200.7	KDM4A-AS1	lncRNA	lncRNA	chr1
STRG.1563.2	ENSG00000236200.7	KDM4A-AS1	lncRNA	lncRNA	chr1
STRG.1563.3	ENSG00000236200.7	KDM4A-AS1	lncRNA	lncRNA	chr1
STRG.1563.4	ENSG00000236200.7	KDM4A-AS1	lncRNA	lncRNA	chr1
STRG.1564.1	ENSG00000126091.21	ST3GAL3	protein_coding	protein_coding	chr1
STRG.1564.2	ENSG00000126091.21	ST3GAL3	protein_coding	protein_coding	chr1
STRG.1564.3	ENSG00000126091.21	ST3GAL3	protein_coding	protein_coding	chr1
STRG.1564.4	ENSG00000126091.21	ST3GAL3	protein_coding	protein_coding	chr1
STRG.1564.5	ENSG00000126091.21	ST3GAL3	protein_coding	protein_coding	chr1
STRG.1564.6	ENSG00000126091.21	ST3GAL3	protein_coding	protein_coding	chr1
STRG.1564.7	ENSG00000126091.21	ST3GAL3	protein_coding	protein_coding	chr1
STRG.1564.8	ENSG00000126091.21	ST3GAL3	protein_coding	protein_coding	chr1
STRG.1564.9	ENSG00000126091.21	ST3GAL3	protein_coding	protein_coding	chr1
STRG.1565.1	ENSG00000283414.1	U6	snRNA	snRNA	chr1
STRG.1566.1	ENSG00000233674.2	ENSG00000233674	processed_pseudogene	processed_pseudogene	chr1
STRG.1567.1	ENSG00000283477.1	MIR6079	miRNA	miRNA	chr1
STRG.1568.1	ENSG00000224751.2	SHMT1P1	processed_pseudogene	processed_pseudogene	chr1
STRG.1570.1	ENSG00000117407.17	ARTN	protein_coding	protein_coding	chr1
STRG.1572.2	ENSG00000237950.3	LINC02918	lncRNA	lncRNA	chr1
STRG.1573.2	ENSG00000288573.3	ENSG00000288573	lncRNA	lncRNA	chr1
STRG.1574.1	ENSG00000117408.11	IPO13	protein_coding	protein_coding	chr1
STRG.1574.2	ENSG00000117408.11	IPO13	protein_coding	protein_coding	chr1
STRG.1575.1	ENSG00000285649.1	ENSG00000285649	lncRNA	lncRNA	chr1
STRG.1576.1	ENSG00000132768.14	DPH2	protein_coding	protein_coding	chr1
STRG.1577.1	ENSG00000117410.14	ATP6V0B	protein_coding	protein_coding	chr1
STRG.1577.2	ENSG00000117410.14	ATP6V0B	protein_coding	protein_coding	chr1
STRG.1577.3	ENSG00000117410.14	ATP6V0B	protein_coding	protein_coding	chr1
STRG.1577.4	ENSG00000117410.14	ATP6V0B	protein_coding	protein_coding	chr1
STRG.1577.5	ENSG00000117410.14	ATP6V0B	protein_coding	protein_coding	chr1
STRG.1578.1	ENSG00000117411.18	B4GALT2	protein_coding	protein_coding	chr1
STRG.1578.2	ENSG00000117411.18	B4GALT2	protein_coding	protein_coding	chr1
STRG.1578.3	ENSG00000117411.18	B4GALT2	protein_coding	protein_coding	chr1
STRG.1578.4	ENSG00000117411.18	B4GALT2	protein_coding	protein_coding	chr1
STRG.1579.3	ENSG00000159214.13	CCDC24	protein_coding	protein_coding	chr1
STRG.1580.1	ENSG00000196517.13	SLC6A9	protein_coding	protein_coding	chr1
STRG.1580.2	ENSG00000196517.13	SLC6A9	protein_coding	protein_coding	chr1
STRG.1580.3	ENSG00000196517.13	SLC6A9	protein_coding	protein_coding	chr1
STRG.1581.1	ENSG00000230615.8	ENSG00000230615	lncRNA	lncRNA	chr1
STRG.1584.1	ENSG00000233514.1	ENSG00000233514	processed_pseudogene	processed_pseudogene	chr1
STRG.1585.1	ENSG00000227994.1	ENSG00000227994	processed_pseudogene	processed_pseudogene	chr1
STRG.1587.1	ENSG00000178028.14	DMAP1	protein_coding	protein_coding	chr1
STRG.1587.2	ENSG00000178028.14	DMAP1	protein_coding	protein_coding	chr1
STRG.1587.3	ENSG00000178028.14	DMAP1	protein_coding	protein_coding	chr1
STRG.1588.1	ENSG00000117419.16	ERI3	protein_coding	protein_coding	chr1
STRG.1592.1	ENSG00000187147.18	RNF220	protein_coding	protein_coding	chr1
STRG.1592.3	ENSG00000187147.18	RNF220	protein_coding	protein_coding	chr1
STRG.1593.1	ENSG00000263381.1	MIR5584	miRNA	miRNA	chr1
STRG.1595.1	ENSG00000126106.14	TMEM53	protein_coding	protein_coding	chr1
STRG.1595.2	ENSG00000126106.14	TMEM53	protein_coding	protein_coding	chr1
STRG.1595.3	ENSG00000126106.14	TMEM53	protein_coding	protein_coding	chr1
STRG.1595.4	ENSG00000126106.14	TMEM53	protein_coding	protein_coding	chr1
STRG.1606.1	ENSG00000199377.1	RNU5F-1	snRNA	snRNA	chr1
STRG.1608.1	ENSG00000200169.1	RNU5D-1	snRNA	snRNA	chr1
STRG.1610.1	ENSG00000142945.13	KIF2C	protein_coding	protein_coding	chr1
STRG.1610.2	ENSG00000142945.13	KIF2C	protein_coding	protein_coding	chr1
STRG.1611.1	ENSG00000142937.12	RPS8	protein_coding	protein_coding	chr1
STRG.1611.2	ENSG00000142937.12	RPS8	protein_coding	protein_coding	chr1
STRG.1612.1	ENSG00000264294.1	SNORD55	snoRNA	snoRNA	chr1
STRG.1613.1	ENSG00000200913.1	SNORD46	snoRNA	snoRNA	chr1
STRG.1614.1	ENSG00000202031.1	SNORD38A	snoRNA	snoRNA	chr1
STRG.1615.1	ENSG00000207421.1	SNORD38B	snoRNA	snoRNA	chr1
STRG.1615.2	ENSG00000281859.1	SNORD38B	snoRNA	snoRNA	chr1
STRG.1616.1	ENSG00000234093.3	RPS15AP11	processed_pseudogene	processed_pseudogene	chr1
STRG.1619.1	ENSG00000173846.13	PLK3	protein_coding	protein_coding	chr1
STRG.1620.1	ENSG00000188396.4	DYNLT4	protein_coding	protein_coding	chr1
STRG.1621.1	ENSG00000290041.1	ENSG00000290041	lncRNA	lncRNA	chr1
STRG.1622.1	ENSG00000222009.9	BTBD19	protein_coding	protein_coding	chr1
STRG.1624.1	ENSG00000202444.1	RNU5E-6P	snRNA	snRNA	chr1
STRG.1630.1	ENSG00000226499.1	ENSG00000226499	processed_pseudogene	processed_pseudogene	chr1
STRG.1631.1	ENSG00000070785.17	EIF2B3	protein_coding	protein_coding	chr1
STRG.1631.2	ENSG00000070785.17	EIF2B3	protein_coding	protein_coding	chr1
STRG.1631.3	ENSG00000070785.17	EIF2B3	protein_coding	protein_coding	chr1
STRG.1634.1	ENSG00000268949.1	MRPS17P1	processed_pseudogene	processed_pseudogene	chr1
STRG.1636.1	ENSG00000126107.15	HECTD3	protein_coding	protein_coding	chr1
STRG.1637.1	ENSG00000126088.14	UROD	protein_coding	protein_coding	chr1
STRG.1637.2	ENSG00000126088.14	UROD	protein_coding	protein_coding	chr1
STRG.1637.3	ENSG00000126088.14	UROD	protein_coding	protein_coding	chr1
STRG.1637.4	ENSG00000126088.14	UROD	protein_coding	protein_coding	chr1
STRG.1637.5	ENSG00000126088.14	UROD	protein_coding	protein_coding	chr1
STRG.1637.6	ENSG00000126088.14	UROD	protein_coding	protein_coding	chr1
STRG.1638.1	ENSG00000162415.7	ZSWIM5	protein_coding	protein_coding	chr1
STRG.1639.1	ENSG00000234315.1	OSTCP5	processed_pseudogene	processed_pseudogene	chr1
STRG.1647.1	ENSG00000281912.1	LINC01144	lncRNA	lncRNA	chr1
STRG.1648.1	ENSG00000132781.20	MUTYH	protein_coding	protein_coding	chr1
STRG.1648.2	ENSG00000132781.20	MUTYH	protein_coding	protein_coding	chr1
STRG.1648.3	ENSG00000132781.20	MUTYH	protein_coding	protein_coding	chr1
STRG.1648.4	ENSG00000132781.20	MUTYH	protein_coding	protein_coding	chr1
STRG.1648.5	ENSG00000132781.20	MUTYH	protein_coding	protein_coding	chr1
STRG.1648.6	ENSG00000132781.20	MUTYH	protein_coding	protein_coding	chr1
STRG.1648.7	ENSG00000132781.20	MUTYH	protein_coding	protein_coding	chr1
STRG.1648.8	ENSG00000132781.20	MUTYH	protein_coding	protein_coding	chr1
STRG.1648.9	ENSG00000132781.20	MUTYH	protein_coding	protein_coding	chr1
STRG.1648.10	ENSG00000132781.20	MUTYH	protein_coding	protein_coding	chr1
STRG.1648.11	ENSG00000132781.20	MUTYH	protein_coding	protein_coding	chr1
STRG.1649.1	ENSG00000132773.12	TOE1	protein_coding	protein_coding	chr1
STRG.1650.1	ENSG00000070759.17	TESK2	protein_coding	protein_coding	chr1
STRG.1651.1	ENSG00000236872.1	PPIAP36	processed_pseudogene	processed_pseudogene	chr1
STRG.1653.1	ENSG00000280670.3	CCDC163	protein_coding	protein_coding	chr1
STRG.1654.1	ENSG00000132763.15	MMACHC	protein_coding	protein_coding	chr1
STRG.1655.1	ENSG00000117450.15	PRDX1	protein_coding	protein_coding	chr1
STRG.1655.2	ENSG00000117450.15	PRDX1	protein_coding	protein_coding	chr1
STRG.1655.3	ENSG00000117450.15	PRDX1	protein_coding	protein_coding	chr1
STRG.1655.4	ENSG00000117450.15	PRDX1	protein_coding	protein_coding	chr1
STRG.1657.1	ENSG00000117448.14	AKR1A1	protein_coding	protein_coding	chr1
STRG.1657.2	ENSG00000117448.14	AKR1A1	protein_coding	protein_coding	chr1
STRG.1657.3	ENSG00000117448.14	AKR1A1	protein_coding	protein_coding	chr1
STRG.1657.4	ENSG00000117448.14	AKR1A1	protein_coding	protein_coding	chr1
STRG.1658.1	ENSG00000280836.1	ENSG00000280836	pseudogene	pseudogene	chr1
STRG.1659.1	ENSG00000289407.1	ENSG00000289407	lncRNA	lncRNA	chr1
STRG.1660.1	ENSG00000132780.17	NASP	protein_coding	protein_coding	chr1
STRG.1660.2	ENSG00000132780.17	NASP	protein_coding	protein_coding	chr1
STRG.1660.3	ENSG00000132780.17	NASP	protein_coding	protein_coding	chr1
STRG.1660.4	ENSG00000132780.17	NASP	protein_coding	protein_coding	chr1
STRG.1660.5	ENSG00000132780.17	NASP	protein_coding	protein_coding	chr1
STRG.1663.1	ENSG00000159592.11	GPBP1L1	protein_coding	protein_coding	chr1
STRG.1663.2	ENSG00000159592.11	GPBP1L1	protein_coding	protein_coding	chr1
STRG.1664.1	ENSG00000225447.1	RPS15AP10	processed_pseudogene	processed_pseudogene	chr1
STRG.1665.1	ENSG00000234329.1	RPL7AP16	processed_pseudogene	processed_pseudogene	chr1
STRG.1666.1	ENSG00000159596.7	TMEM69	protein_coding	protein_coding	chr1
STRG.1667.1	ENSG00000197429.11	IPP	protein_coding	protein_coding	chr1
STRG.1670.1	ENSG00000236111.5	RPL6P1	processed_pseudogene	processed_pseudogene	chr1
STRG.1671.1	ENSG00000086015.23	MAST2	protein_coding	protein_coding	chr1
STRG.1672.1	ENSG00000232467.2	TMA16P2	processed_pseudogene	processed_pseudogene	chr1
STRG.1673.1	ENSG00000117461.15	PIK3R3	protein_coding	protein_coding	chr1
STRG.1673.2	ENSG00000117461.15	PIK3R3	protein_coding	protein_coding	chr1
STRG.1673.3	ENSG00000117461.15	PIK3R3	protein_coding	protein_coding	chr1
STRG.1675.1	ENSG00000233114.2	ENSG00000233114	processed_pseudogene	processed_pseudogene	chr1
STRG.1676.1	ENSG00000227857.2	ENSG00000227857	lncRNA	lncRNA	chr1
STRG.1679.1	ENSG00000085998.15	POMGNT1	protein_coding	protein_coding	chr1
STRG.1679.2	ENSG00000085998.15	POMGNT1	protein_coding	protein_coding	chr1
STRG.1679.3	ENSG00000085998.15	POMGNT1	protein_coding	protein_coding	chr1
STRG.1679.4	ENSG00000085998.15	POMGNT1	protein_coding	protein_coding	chr1
STRG.1681.1	ENSG00000171357.6	LURAP1	protein_coding	protein_coding	chr1
STRG.1686.1	ENSG00000085999.13	RAD54L	protein_coding	protein_coding	chr1
STRG.1687.1	ENSG00000132128.18	LRRC41	protein_coding	protein_coding	chr1
STRG.1687.2	ENSG00000132128.18	LRRC41	protein_coding	protein_coding	chr1
STRG.1687.3	ENSG00000132128.18	LRRC41	protein_coding	protein_coding	chr1
STRG.1688.1	ENSG00000173660.12	UQCRH	protein_coding	protein_coding	chr1
STRG.1690.1	ENSG00000117481.11	NSUN4	protein_coding	protein_coding	chr1
STRG.1690.2	ENSG00000117481.11	NSUN4	protein_coding	protein_coding	chr1
STRG.1690.3	ENSG00000117481.11	NSUN4	protein_coding	protein_coding	chr1
STRG.1691.1	ENSG00000225779.1	ENSG00000225779	processed_pseudogene	processed_pseudogene	chr1
STRG.1692.1	ENSG00000117480.16	FAAH	protein_coding	protein_coding	chr1
STRG.1694.1	ENSG00000291138.1	ENSG00000291138	lncRNA	lncRNA	chr1
STRG.1697.3	ENSG00000197587.11	DMBX1	protein_coding	protein_coding	chr1
STRG.1697.6	ENSG00000197587.11	DMBX1	protein_coding	protein_coding	chr1
STRG.1698.4	ENSG00000079277.22	MKNK1	protein_coding	protein_coding	chr1
STRG.1698.5	ENSG00000079277.22	MKNK1	protein_coding	protein_coding	chr1
STRG.1698.6	ENSG00000079277.22	MKNK1	protein_coding	protein_coding	chr1
STRG.1698.7	ENSG00000079277.22	MKNK1	protein_coding	protein_coding	chr1
STRG.1700.1	ENSG00000142961.16	MOB3C	protein_coding	protein_coding	chr1
STRG.1700.2	ENSG00000142961.16	MOB3C	protein_coding	protein_coding	chr1
STRG.1702.1	ENSG00000123472.13	ATPAF1	protein_coding	protein_coding	chr1
STRG.1702.2	ENSG00000123472.13	ATPAF1	protein_coding	protein_coding	chr1
STRG.1702.3	ENSG00000123472.13	ATPAF1	protein_coding	protein_coding	chr1
STRG.1703.1	ENSG00000233647.2	NENFP1	processed_pseudogene	processed_pseudogene	chr1
STRG.1704.1	ENSG00000159658.15	EFCAB14	protein_coding	protein_coding	chr1
STRG.1704.2	ENSG00000159658.15	EFCAB14	protein_coding	protein_coding	chr1
STRG.1704.3	ENSG00000159658.15	EFCAB14	protein_coding	protein_coding	chr1
STRG.1704.6	ENSG00000159658.15	EFCAB14	protein_coding	protein_coding	chr1
STRG.1704.7	ENSG00000159658.15	EFCAB14	protein_coding	protein_coding	chr1
STRG.1707.1	ENSG00000238145.2	TUBAP8	processed_pseudogene	processed_pseudogene	chr1
STRG.1708.1	ENSG00000261290.1	CYP4A44P	unprocessed_pseudogene	unprocessed_pseudogene	chr1
STRG.1709.1	ENSG00000186377.8	CYP4X1	protein_coding	protein_coding	chr1
STRG.1711.1	ENSG00000225154.2	TUBAP9	processed_pseudogene	processed_pseudogene	chr1
STRG.1715.1	ENSG00000224805.2	LINC00853	lncRNA	lncRNA	chr1
STRG.1716.1	ENSG00000290081.1	ENSG00000290081	lncRNA	lncRNA	chr1
STRG.1718.2	ENSG00000123473.17	STIL	protein_coding	protein_coding	chr1
STRG.1718.4	ENSG00000123473.17	STIL	protein_coding	protein_coding	chr1
STRG.1718.8	ENSG00000123473.17	STIL	protein_coding	protein_coding	chr1
STRG.1718.9	ENSG00000123473.17	STIL	protein_coding	protein_coding	chr1
STRG.1718.10	ENSG00000123473.17	STIL	protein_coding	protein_coding	chr1
STRG.1722.1	ENSG00000162368.15	CMPK1	protein_coding	protein_coding	chr1
STRG.1722.2	ENSG00000162368.15	CMPK1	protein_coding	protein_coding	chr1
STRG.1722.3	ENSG00000162368.15	CMPK1	protein_coding	protein_coding	chr1
STRG.1722.4	ENSG00000162368.15	CMPK1	protein_coding	protein_coding	chr1
STRG.1729.1	ENSG00000186790.6	FOXE3	protein_coding	protein_coding	chr1
STRG.1732.1	ENSG00000237424.1	FOXD2-AS1	lncRNA	lncRNA	chr1
STRG.1733.1	ENSG00000186564.6	FOXD2	protein_coding	protein_coding	chr1
STRG.1738.1	ENSG00000162396.6	PARS2	protein_coding	protein_coding	chr1
STRG.1746.1	ENSG00000243725.7	TTC4	protein_coding	protein_coding	chr1
STRG.1750.1	ENSG00000116133.13	DHCR24	protein_coding	protein_coding	chr1
STRG.1750.2	ENSG00000116133.13	DHCR24	protein_coding	protein_coding	chr1
STRG.1751.1	ENSG00000233203.6	DHCR24-DT	lncRNA	lncRNA	chr1
STRG.1755.1	ENSG00000199831.1	RN7SKP291	misc_RNA	misc_RNA	chr1
STRG.1762.1	ENSG00000162402.15	USP24	protein_coding	protein_coding	chr1
STRG.1762.3	ENSG00000162402.15	USP24	protein_coding	protein_coding	chr1
STRG.1763.2	ENSG00000284686.1	ENSG00000284686	protein_coding	nonsense_mediated_decay	chr1
STRG.1769.1	ENSG00000223956.5	LINC01767	lncRNA	lncRNA	chr1
STRG.1763.3	ENSG00000162407.9	PLPP3	protein_coding	protein_coding	chr1
STRG.1774.1	ENSG00000225475.1	ENSG00000225475	processed_pseudogene	processed_pseudogene	chr1
STRG.1775.1	ENSG00000162409.12	PRKAA2	protein_coding	protein_coding	chr1
STRG.1776.1	ENSG00000134716.11	CYP2J2	protein_coding	protein_coding	chr1
STRG.1777.1	ENSG00000134709.13	HOOK1	protein_coding	protein_coding	chr1
STRG.1780.1	ENSG00000173406.16	DAB1	protein_coding	protein_coding	chr1
STRG.1780.2	ENSG00000173406.16	DAB1	protein_coding	protein_coding	chr1
STRG.1794.1	ENSG00000236888.1	RPS20P5	processed_pseudogene	processed_pseudogene	chr1
STRG.1803.1	ENSG00000290536.1	ENSG00000290536	lncRNA	lncRNA	chr1
STRG.1804.1	ENSG00000223416.3	RPS26P15	processed_pseudogene	processed_pseudogene	chr1
STRG.1811.1	ENSG00000233216.1	ENSG00000233216	processed_pseudogene	processed_pseudogene	chr1
STRG.1827.1	ENSG00000185839.3	ENSG00000185839	processed_pseudogene	processed_pseudogene	chr1
STRG.1828.2	ENSG00000162601.12	MYSM1	protein_coding	protein_coding	chr1
STRG.1828.4	ENSG00000162601.12	MYSM1	protein_coding	protein_coding	chr1
STRG.1829.1	ENSG00000177606.8	JUN	protein_coding	protein_coding	chr1
STRG.1830.1	ENSG00000290013.1	ENSG00000290013	lncRNA	lncRNA	chr1
STRG.1831.1	ENSG00000272226.1	ENSG00000272226	lncRNA	lncRNA	chr1
STRG.1834.1	ENSG00000228121.1	PHB1P3	processed_pseudogene	processed_pseudogene	chr1
STRG.1837.1	ENSG00000270457.1	ENSG00000270457	lncRNA	lncRNA	chr1
STRG.1838.1	ENSG00000224609.8	FGGY-DT	lncRNA	lncRNA	chr1
STRG.1839.7	ENSG00000172456.18	FGGY	protein_coding	protein_coding	chr1
STRG.1839.8	ENSG00000172456.18	FGGY	protein_coding	protein_coding	chr1
STRG.1843.1	ENSG00000225671.2	FCF1P6	processed_pseudogene	processed_pseudogene	chr1
STRG.1844.1	ENSG00000142700.12	DMRTA2	protein_coding	protein_coding	chr1
STRG.1844.2	ENSG00000142700.12	DMRTA2	protein_coding	protein_coding	chr1
STRG.1845.1	ENSG00000284700.2	ENSG00000284700	lncRNA	lncRNA	chr1
STRG.1846.1	ENSG00000185104.21	FAF1	protein_coding	protein_coding	chr1
STRG.1847.1	ENSG00000123080.12	CDKN2C	protein_coding	protein_coding	chr1
STRG.1848.1	ENSG00000290102.1	ENSG00000290102	lncRNA	lncRNA	chr1
STRG.1847.2	ENSG00000123080.12	CDKN2C	protein_coding	protein_coding	chr1
STRG.1847.3	ENSG00000123080.12	CDKN2C	protein_coding	protein_coding	chr1
STRG.1852.1	ENSG00000200262.1	Y_RNA	misc_RNA	misc_RNA	chr1
STRG.1854.1	ENSG00000213478.2	CFL1P2	processed_pseudogene	processed_pseudogene	chr1
STRG.1858.1	ENSG00000123091.5	RNF11	protein_coding	protein_coding	chr1
STRG.1859.1	ENSG00000233406.5	ENSG00000233406	processed_pseudogene	processed_pseudogene	chr1
STRG.1862.1	ENSG00000085831.16	TTC39A	protein_coding	protein_coding	chr1
STRG.1862.2	ENSG00000085831.16	TTC39A	protein_coding	protein_coding	chr1
STRG.1862.3	ENSG00000085831.16	TTC39A	protein_coding	protein_coding	chr1
STRG.1862.4	ENSG00000085831.16	TTC39A	protein_coding	protein_coding	chr1
STRG.1862.5	ENSG00000085831.16	TTC39A	protein_coding	protein_coding	chr1
STRG.1862.6	ENSG00000085831.16	TTC39A	protein_coding	protein_coding	chr1
STRG.1866.1	ENSG00000085832.18	EPS15	protein_coding	protein_coding	chr1
STRG.1866.2	ENSG00000085832.18	EPS15	protein_coding	protein_coding	chr1
STRG.1866.3	ENSG00000085832.18	EPS15	protein_coding	protein_coding	chr1
STRG.1866.4	ENSG00000085832.18	EPS15	protein_coding	protein_coding	chr1
STRG.1872.1	ENSG00000117859.19	OSBPL9	protein_coding	protein_coding	chr1
STRG.1872.4	ENSG00000117859.19	OSBPL9	protein_coding	protein_coding	chr1
STRG.1873.1	ENSG00000232846.1	SLC25A6P3	processed_pseudogene	processed_pseudogene	chr1
STRG.1872.5	ENSG00000117859.19	OSBPL9	protein_coding	protein_coding	chr1
STRG.1872.6	ENSG00000117859.19	OSBPL9	protein_coding	protein_coding	chr1
STRG.1874.1	ENSG00000078618.23	NRDC	protein_coding	protein_coding	chr1
STRG.1874.2	ENSG00000078618.23	NRDC	protein_coding	protein_coding	chr1
STRG.1874.3	ENSG00000078618.23	NRDC	protein_coding	protein_coding	chr1
STRG.1875.1	ENSG00000272175.1	ENSG00000272175	lncRNA	lncRNA	chr1
STRG.1877.1	ENSG00000169213.7	RAB3B	protein_coding	protein_coding	chr1
STRG.1878.1	ENSG00000117862.13	TXNDC12	protein_coding	protein_coding	chr1
STRG.1878.2	ENSG00000198841.4	KTI12	protein_coding	protein_coding	chr1
STRG.1878.3	ENSG00000117862.13	TXNDC12	protein_coding	protein_coding	chr1
STRG.1879.1	ENSG00000134717.18	BTF3L4	protein_coding	protein_coding	chr1
STRG.1879.2	ENSG00000134717.18	BTF3L4	protein_coding	protein_coding	chr1
STRG.1879.3	ENSG00000134717.18	BTF3L4	protein_coding	protein_coding	chr1
STRG.1879.4	ENSG00000134717.18	BTF3L4	protein_coding	protein_coding	chr1
STRG.1882.1	ENSG00000157077.16	ZFYVE9	protein_coding	protein_coding	chr1
STRG.1882.2	ENSG00000157077.16	ZFYVE9	protein_coding	protein_coding	chr1
STRG.1882.3	ENSG00000157077.16	ZFYVE9	protein_coding	protein_coding	chr1
STRG.1883.1	ENSG00000241745.3	RN7SL788P	misc_RNA	misc_RNA	chr1
STRG.1884.1	ENSG00000228407.2	ENSG00000228407	processed_pseudogene	processed_pseudogene	chr1
STRG.1885.1	ENSG00000224255.2	PDCL3P6	processed_pseudogene	processed_pseudogene	chr1
STRG.1886.1	ENSG00000213735.2	ANAPC10P1	processed_pseudogene	processed_pseudogene	chr1
STRG.1887.1	ENSG00000154222.15	CC2D1B	protein_coding	protein_coding	chr1
STRG.1887.2	ENSG00000154222.15	CC2D1B	protein_coding	protein_coding	chr1
STRG.1888.1	ENSG00000272100.1	ENSG00000272100	lncRNA	lncRNA	chr1
STRG.1889.1	ENSG00000287078.1	ENSG00000287078	lncRNA	lncRNA	chr1
STRG.1890.1	ENSG00000224680.4	PLA2G12AP1	processed_pseudogene	processed_pseudogene	chr1
STRG.1891.1	ENSG00000085840.13	ORC1	protein_coding	protein_coding	chr1
STRG.1891.2	ENSG00000085840.13	ORC1	protein_coding	protein_coding	chr1
STRG.1892.1	ENSG00000134748.13	PRPF38A	protein_coding	protein_coding	chr1
STRG.1893.1	ENSG00000134744.14	TUT4	protein_coding	protein_coding	chr1
STRG.1893.4	ENSG00000134744.14	TUT4	protein_coding	protein_coding	chr1
STRG.1894.1	ENSG00000272371.1	ENSG00000272371	lncRNA	lncRNA	chr1
STRG.1897.1	ENSG00000236290.1	EEF1GP7	processed_pseudogene	processed_pseudogene	chr1
STRG.1900.1	ENSG00000162377.6	COA7	protein_coding	protein_coding	chr1
STRG.1903.1	ENSG00000233664.1	NDUFS5P3	processed_pseudogene	processed_pseudogene	chr1
STRG.1904.1	ENSG00000239640.3	RN7SL62P	misc_RNA	misc_RNA	chr1
STRG.1905.1	ENSG00000162378.13	ZYG11B	protein_coding	protein_coding	chr1
STRG.1906.1	ENSG00000252018.1	RNU2-30P	snRNA	snRNA	chr1
STRG.1908.1	ENSG00000228929.1	RPS13P2	processed_pseudogene	processed_pseudogene	chr1
STRG.1909.1	ENSG00000203995.10	ZYG11A	protein_coding	protein_coding	chr1
STRG.1909.2	ENSG00000203995.10	ZYG11A	protein_coding	protein_coding	chr1
STRG.1910.3	ENSG00000121310.17	ECHDC2	protein_coding	protein_coding	chr1
STRG.1910.4	ENSG00000121310.17	ECHDC2	protein_coding	protein_coding	chr1
STRG.1911.1	ENSG00000230953.2	ENSG00000230953	processed_pseudogene	processed_pseudogene	chr1
STRG.1913.1	ENSG00000231866.2	ENSG00000231866	processed_pseudogene	processed_pseudogene	chr1
STRG.1914.1	ENSG00000116171.19	SCP2	protein_coding	protein_coding	chr1
STRG.1914.2	ENSG00000116171.19	SCP2	protein_coding	protein_coding	chr1
STRG.1914.3	ENSG00000116171.19	SCP2	protein_coding	protein_coding	chr1
STRG.1914.4	ENSG00000116171.19	SCP2	protein_coding	protein_coding	chr1
STRG.1915.1	ENSG00000264834.1	ENSG00000264834	miRNA	miRNA	chr1
STRG.1916.1	ENSG00000265815.1	ENSG00000265815	miRNA	miRNA	chr1
STRG.1917.1	ENSG00000236360.2	RRAS2P1	processed_pseudogene	processed_pseudogene	chr1
STRG.1918.1	ENSG00000226147.1	TUBBP10	processed_pseudogene	processed_pseudogene	chr1
STRG.1914.5	ENSG00000116171.19	SCP2	protein_coding	protein_coding	chr1
STRG.1914.6	ENSG00000116171.19	SCP2	protein_coding	protein_coding	chr1
STRG.1914.7	ENSG00000116171.19	SCP2	protein_coding	protein_coding	chr1
STRG.1919.1	ENSG00000157184.7	CPT2	protein_coding	protein_coding	chr1
STRG.1919.2	ENSG00000157184.7	CPT2	protein_coding	protein_coding	chr1
STRG.1919.3	ENSG00000157184.7	CPT2	protein_coding	protein_coding	chr1
STRG.1920.1	ENSG00000162384.14	CZIB	protein_coding	protein_coding	chr1
STRG.1921.1	ENSG00000259818.1	CZIB-DT	lncRNA	lncRNA	chr1
STRG.1922.1	ENSG00000162385.11	MAGOH	protein_coding	protein_coding	chr1
STRG.1922.2	ENSG00000162385.11	MAGOH	protein_coding	protein_coding	chr1
STRG.1924.1	ENSG00000157193.18	LRP8	protein_coding	protein_coding	chr1
STRG.1924.2	ENSG00000157193.18	LRP8	protein_coding	protein_coding	chr1
STRG.1924.3	ENSG00000157193.18	LRP8	protein_coding	protein_coding	chr1
STRG.1924.7	ENSG00000157193.18	LRP8	protein_coding	protein_coding	chr1
STRG.1924.8	ENSG00000157193.18	LRP8	protein_coding	protein_coding	chr1
STRG.1925.1	ENSG00000225675.2	LRP8-DT	lncRNA	lncRNA	chr1
STRG.1928.1	ENSG00000174332.6	GLIS1	protein_coding	protein_coding	chr1
STRG.1930.1	ENSG00000239007.1	RNU7-95P	snRNA	snRNA	chr1
STRG.1934.1	ENSG00000058804.12	NDC1	protein_coding	protein_coding	chr1
STRG.1935.1	ENSG00000201003.1	ENSG00000201003	snoRNA	snoRNA	chr1
STRG.1936.3	ENSG00000058799.15	YIPF1	protein_coding	protein_coding	chr1
STRG.1937.1	ENSG00000081870.12	HSPB11	protein_coding	protein_coding	chr1
STRG.1937.2	ENSG00000081870.12	HSPB11	protein_coding	protein_coding	chr1
STRG.1937.3	ENSG00000081870.12	HSPB11	protein_coding	protein_coding	chr1
STRG.1937.4	ENSG00000081870.12	HSPB11	protein_coding	protein_coding	chr1
STRG.1938.1	ENSG00000116212.15	LRRC42	protein_coding	protein_coding	chr1
STRG.1938.2	ENSG00000116212.15	LRRC42	protein_coding	protein_coding	chr1
STRG.1940.1	ENSG00000219102.3	HNRNPA3P12	processed_pseudogene	processed_pseudogene	chr1
STRG.1941.1	ENSG00000116209.12	TMEM59	protein_coding	protein_coding	chr1
STRG.1941.3	ENSG00000116209.12	TMEM59	protein_coding	protein_coding	chr1
STRG.1941.4	ENSG00000116209.12	TMEM59	protein_coding	protein_coding	chr1
STRG.1942.1	ENSG00000280378.1	ENSG00000280378	TEC	TEC	chr1
STRG.1941.5	ENSG00000116209.12	TMEM59	protein_coding	protein_coding	chr1
STRG.1943.1	ENSG00000116205.14	TCEANC2	protein_coding	protein_coding	chr1
STRG.1943.2	ENSG00000116205.14	TCEANC2	protein_coding	protein_coding	chr1
STRG.1944.1	ENSG00000225183.1	ENSG00000225183	processed_pseudogene	processed_pseudogene	chr1
STRG.1950.4	ENSG00000215883.11	CYB5RL	protein_coding	protein_coding	chr1
STRG.1950.5	ENSG00000215883.11	CYB5RL	protein_coding	protein_coding	chr1
STRG.1950.7	ENSG00000215883.11	CYB5RL	protein_coding	protein_coding	chr1
STRG.1951.1	ENSG00000116221.15	MRPL37	protein_coding	protein_coding	chr1
STRG.1951.2	ENSG00000116221.15	MRPL37	protein_coding	protein_coding	chr1
STRG.1952.1	ENSG00000157216.17	SSBP3	protein_coding	protein_coding	chr1
STRG.1952.2	ENSG00000157216.17	SSBP3	protein_coding	protein_coding	chr1
STRG.1953.1	ENSG00000198711.5	SSBP3-AS1	lncRNA	lncRNA	chr1
STRG.1964.1	ENSG00000162599.18	NFIA	protein_coding	protein_coding	chr1
STRG.1964.2	ENSG00000162599.18	NFIA	protein_coding	protein_coding	chr1
STRG.1964.3	ENSG00000162599.18	NFIA	protein_coding	protein_coding	chr1
STRG.1964.4	ENSG00000162599.18	NFIA	protein_coding	protein_coding	chr1
STRG.1964.5	ENSG00000162599.18	NFIA	protein_coding	protein_coding	chr1
STRG.1964.6	ENSG00000162599.18	NFIA	protein_coding	protein_coding	chr1
STRG.1964.7	ENSG00000162599.18	NFIA	protein_coding	protein_coding	chr1
STRG.1964.8	ENSG00000162599.18	NFIA	protein_coding	protein_coding	chr1
STRG.1969.2	ENSG00000162604.12	TM2D1	protein_coding	protein_coding	chr1
STRG.1969.3	ENSG00000162604.12	TM2D1	protein_coding	protein_coding	chr1
STRG.1970.1	ENSG00000271200.1	PATJ-DT	lncRNA	lncRNA	chr1
STRG.1971.2	ENSG00000132849.22	PATJ	protein_coding	protein_coding	chr1
STRG.1971.3	ENSG00000132849.22	PATJ	protein_coding	protein_coding	chr1
STRG.1972.1	ENSG00000200575.1	RNU6-414P	snRNA	snRNA	chr1
STRG.1973.1	ENSG00000212360.1	RNU6-1177P	snRNA	snRNA	chr1
STRG.1975.1	ENSG00000236646.1	LAMTOR5P1	processed_pseudogene	processed_pseudogene	chr1
STRG.1976.1	ENSG00000242860.3	RN7SL180P	misc_RNA	misc_RNA	chr1
STRG.1979.1	ENSG00000132854.19	KANK4	protein_coding	protein_coding	chr1
STRG.1979.2	ENSG00000132854.19	KANK4	protein_coding	protein_coding	chr1
STRG.1982.1	ENSG00000162607.13	USP1	protein_coding	protein_coding	chr1
STRG.1982.2	ENSG00000162607.13	USP1	protein_coding	protein_coding	chr1
STRG.1983.1	ENSG00000116641.18	DOCK7	protein_coding	protein_coding	chr1
STRG.1983.2	ENSG00000116641.18	DOCK7	protein_coding	protein_coding	chr1
STRG.1983.3	ENSG00000116641.18	DOCK7	protein_coding	protein_coding	chr1
STRG.1983.4	ENSG00000116641.18	DOCK7	protein_coding	protein_coding	chr1
STRG.1983.5	ENSG00000116641.18	DOCK7	protein_coding	protein_coding	chr1
STRG.1983.6	ENSG00000116641.18	DOCK7	protein_coding	protein_coding	chr1
STRG.1983.7	ENSG00000116641.18	DOCK7	protein_coding	protein_coding	chr1
STRG.1984.1	ENSG00000278967.1	ENSG00000278967	TEC	TEC	chr1
STRG.1985.1	ENSG00000213703.2	ENSG00000213703	processed_pseudogene	processed_pseudogene	chr1
STRG.1986.1	ENSG00000235545.1	DOCK7-DT	lncRNA	lncRNA	chr1
STRG.1989.1	ENSG00000125703.15	ATG4C	protein_coding	protein_coding	chr1
STRG.1989.3	ENSG00000125703.15	ATG4C	protein_coding	protein_coding	chr1
STRG.1990.1	ENSG00000234318.1	ENSG00000234318	lncRNA	lncRNA	chr1
STRG.1997.2	ENSG00000230798.7	FOXD3-AS1	lncRNA	lncRNA	chr1
STRG.1997.3	ENSG00000230798.7	FOXD3-AS1	lncRNA	lncRNA	chr1
STRG.1998.1	ENSG00000187140.6	FOXD3	protein_coding	protein_coding	chr1
STRG.2000.1	ENSG00000236674.1	ENSG00000236674	processed_pseudogene	processed_pseudogene	chr1
STRG.2001.1	ENSG00000088035.18	ALG6	protein_coding	protein_coding	chr1
STRG.2002.1	ENSG00000142856.17	ITGB3BP	protein_coding	protein_coding	chr1
STRG.2002.3	ENSG00000142856.17	ITGB3BP	protein_coding	protein_coding	chr1
STRG.2003.1	ENSG00000203965.13	EFCAB7	protein_coding	protein_coding	chr1
STRG.2004.1	ENSG00000116652.6	DLEU2L	lncRNA	lncRNA	chr1
STRG.2005.1	ENSG00000277689.1	ENSG00000277689	misc_RNA	misc_RNA	chr1
STRG.2011.1	ENSG00000079739.17	PGM1	protein_coding	protein_coding	chr1
STRG.2011.2	ENSG00000079739.17	PGM1	protein_coding	protein_coding	chr1
STRG.2011.3	ENSG00000079739.17	PGM1	protein_coding	protein_coding	chr1
STRG.2012.1	ENSG00000244256.3	RN7SL130P	misc_RNA	misc_RNA	chr1
STRG.2016.1	ENSG00000185483.13	ROR1	protein_coding	protein_coding	chr1
STRG.2016.2	ENSG00000185483.13	ROR1	protein_coding	protein_coding	chr1
STRG.2017.1	ENSG00000228056.3	CFL1P3	processed_pseudogene	processed_pseudogene	chr1
STRG.2020.1	ENSG00000158966.16	CACHD1	protein_coding	protein_coding	chr1
STRG.2020.2	ENSG00000158966.16	CACHD1	protein_coding	protein_coding	chr1
STRG.2023.1	ENSG00000162437.15	RAVER2	protein_coding	protein_coding	chr1
STRG.2023.2	ENSG00000162437.15	RAVER2	protein_coding	protein_coding	chr1
STRG.2024.1	ENSG00000162434.14	JAK1	protein_coding	protein_coding	chr1
STRG.2024.2	ENSG00000162434.14	JAK1	protein_coding	protein_coding	chr1
STRG.2024.3	ENSG00000162434.14	JAK1	protein_coding	protein_coding	chr1
STRG.2024.4	ENSG00000162434.14	JAK1	protein_coding	protein_coding	chr1
STRG.2024.5	ENSG00000162434.14	JAK1	protein_coding	protein_coding	chr1
STRG.2025.1	ENSG00000226891.9	LINC01359	lncRNA	lncRNA	chr1
STRG.2026.1	ENSG00000185031.6	SLC2A3P2	processed_pseudogene	processed_pseudogene	chr1
STRG.2027.1	ENSG00000272506.1	ENSG00000272506	lncRNA	lncRNA	chr1
STRG.2028.1	ENSG00000212257.1	RNU6-1176P	snRNA	snRNA	chr1
STRG.2030.1	ENSG00000265996.1	MIR3671	miRNA	miRNA	chr1
STRG.2031.1	ENSG00000199135.1	MIR101-1	miRNA	miRNA	chr1
STRG.2032.1	ENSG00000288804.1	ENSG00000288804	lncRNA	lncRNA	chr1
STRG.2033.1	ENSG00000234496.2	MRPS21P1	processed_pseudogene	processed_pseudogene	chr1
STRG.2036.1	ENSG00000162433.15	AK4	protein_coding	protein_coding	chr1
STRG.2036.3	ENSG00000162433.15	AK4	protein_coding	protein_coding	chr1
STRG.2036.4	ENSG00000162433.15	AK4	protein_coding	protein_coding	chr1
STRG.2036.5	ENSG00000162433.15	AK4	protein_coding	protein_coding	chr1
STRG.2037.1	ENSG00000231622.1	RPS29P7	processed_pseudogene	processed_pseudogene	chr1
STRG.2039.4	ENSG00000116675.16	DNAJC6	protein_coding	protein_coding	chr1
STRG.2039.5	ENSG00000116675.16	DNAJC6	protein_coding	protein_coding	chr1
STRG.2041.1	ENSG00000213625.9	LEPROT	protein_coding	protein_coding	chr1
STRG.2041.2	ENSG00000116678.20	LEPR	protein_coding	protein_coding	chr1
STRG.2041.3	ENSG00000116678.20	LEPR	protein_coding	protein_coding	chr1
STRG.2041.4	ENSG00000213625.9	LEPROT	protein_coding	protein_coding	chr1
STRG.2041.5	ENSG00000213625.9	LEPROT	protein_coding	protein_coding	chr1
STRG.2043.1	ENSG00000237852.1	ENSG00000237852	lncRNA	lncRNA	chr1
STRG.2041.6	ENSG00000116678.20	LEPR	protein_coding	protein_coding	chr1
STRG.2045.1	ENSG00000184588.18	PDE4B	protein_coding	protein_coding	chr1
STRG.2045.2	ENSG00000184588.18	PDE4B	protein_coding	protein_coding	chr1
STRG.2045.6	ENSG00000184588.18	PDE4B	protein_coding	protein_coding	chr1
STRG.2045.7	ENSG00000184588.18	PDE4B	protein_coding	protein_coding	chr1
STRG.2050.1	ENSG00000229133.1	RPS7P4	processed_pseudogene	processed_pseudogene	chr1
STRG.2052.1	ENSG00000024526.17	DEPDC1	protein_coding	protein_coding	chr1
STRG.2052.2	ENSG00000024526.17	DEPDC1	protein_coding	protein_coding	chr1
STRG.2053.1	ENSG00000234264.1	DEPDC1-AS1	lncRNA	lncRNA	chr1
STRG.2056.2	ENSG00000285407.1	ENSG00000285407	lncRNA	lncRNA	chr1
STRG.2064.5	ENSG00000152763.17	DNAI4	protein_coding	protein_coding	chr1
STRG.2064.6	ENSG00000152763.17	DNAI4	protein_coding	protein_coding	chr1
STRG.2065.1	ENSG00000198160.15	MIER1	protein_coding	protein_coding	chr1
STRG.2065.2	ENSG00000198160.15	MIER1	protein_coding	protein_coding	chr1
STRG.2065.3	ENSG00000198160.15	MIER1	protein_coding	protein_coding	chr1
STRG.2065.4	ENSG00000198160.15	MIER1	protein_coding	protein_coding	chr1
STRG.2065.5	ENSG00000289394.1	ENSG00000289394	lncRNA	lncRNA	chr1
STRG.2065.6	ENSG00000198160.15	MIER1	protein_coding	protein_coding	chr1
STRG.2066.1	ENSG00000116704.8	SLC35D1	protein_coding	protein_coding	chr1
STRG.2079.1	ENSG00000142864.15	SERBP1	protein_coding	protein_coding	chr1
STRG.2079.2	ENSG00000142864.15	SERBP1	protein_coding	protein_coding	chr1
STRG.2079.3	ENSG00000142864.15	SERBP1	protein_coding	protein_coding	chr1
STRG.2079.4	ENSG00000142864.15	SERBP1	protein_coding	protein_coding	chr1
STRG.2085.1	ENSG00000116717.13	GADD45A	protein_coding	protein_coding	chr1
STRG.2085.2	ENSG00000116717.13	GADD45A	protein_coding	protein_coding	chr1
STRG.2085.3	ENSG00000116717.13	GADD45A	protein_coding	protein_coding	chr1
STRG.2085.4	ENSG00000116717.13	GADD45A	protein_coding	protein_coding	chr1
STRG.2086.1	ENSG00000172380.6	GNG12	protein_coding	protein_coding	chr1
STRG.2087.1	ENSG00000238778.1	RNU7-80P	snRNA	snRNA	chr1
STRG.2094.1	ENSG00000235055.3	ENSG00000235055	processed_pseudogene	processed_pseudogene	chr1
STRG.2095.1	ENSG00000162595.8	DIRAS3	protein_coding	protein_coding	chr1
STRG.2095.2	ENSG00000162595.8	DIRAS3	protein_coding	protein_coding	chr1
STRG.2096.1	ENSG00000228431.1	ARL5AP3	processed_pseudogene	processed_pseudogene	chr1
STRG.2099.1	ENSG00000116729.14	WLS	protein_coding	protein_coding	chr1
STRG.2099.2	ENSG00000116729.14	WLS	protein_coding	protein_coding	chr1
STRG.2099.3	ENSG00000116729.14	WLS	protein_coding	protein_coding	chr1
STRG.2102.1	ENSG00000234383.1	CTBP2P8	processed_pseudogene	processed_pseudogene	chr1
STRG.2103.1	ENSG00000221203.1	MIR1262	miRNA	miRNA	chr1
STRG.2099.4	ENSG00000116729.14	WLS	protein_coding	protein_coding	chr1
STRG.2113.1	ENSG00000254685.8	FPGT	protein_coding	protein_coding	chr1
STRG.2113.3	ENSG00000254685.8	FPGT	protein_coding	protein_coding	chr1
STRG.2113.4	ENSG00000259030.8	FPGT-TNNI3K	protein_coding	protein_coding	chr1
STRG.2119.1	ENSG00000240692.3	RN7SL538P	misc_RNA	misc_RNA	chr1
STRG.2121.1	ENSG00000229359.2	PIN1P1	transcribed_processed_pseudogene	transcribed_processed_pseudogene	chr1
STRG.2123.1	ENSG00000066557.6	LRRC40	protein_coding	protein_coding	chr1
STRG.2124.1	ENSG00000244389.3	RN7SL242P	misc_RNA	misc_RNA	chr1
STRG.2125.1	ENSG00000116754.14	SRSF11	protein_coding	protein_coding	chr1
STRG.2125.2	ENSG00000116754.14	SRSF11	protein_coding	protein_coding	chr1
STRG.2125.3	ENSG00000116754.14	SRSF11	protein_coding	protein_coding	chr1
STRG.2125.4	ENSG00000116754.14	SRSF11	protein_coding	protein_coding	chr1
STRG.2126.1	ENSG00000118454.13	ANKRD13C	protein_coding	protein_coding	chr1
STRG.2126.2	ENSG00000118454.13	ANKRD13C	protein_coding	protein_coding	chr1
STRG.2127.2	ENSG00000197568.15	HHLA3	lncRNA	lncRNA	chr1
STRG.2128.1	ENSG00000226088.1	HHLA3-AS1	lncRNA	lncRNA	chr1
STRG.2130.1	ENSG00000116761.12	CTH	protein_coding	protein_coding	chr1
STRG.2130.2	ENSG00000116761.12	CTH	protein_coding	protein_coding	chr1
STRG.2130.3	ENSG00000116761.12	CTH	protein_coding	protein_coding	chr1
STRG.2131.1	ENSG00000278636.1	Metazoa_SRP	misc_RNA	misc_RNA	chr1
STRG.2132.1	ENSG00000271992.1	ENSG00000271992	lncRNA	lncRNA	chr1
STRG.2135.1	ENSG00000050628.21	PTGER3	protein_coding	protein_coding	chr1
STRG.2136.1	ENSG00000132485.14	ZRANB2	protein_coding	protein_coding	chr1
STRG.2136.2	ENSG00000132485.14	ZRANB2	protein_coding	protein_coding	chr1
STRG.2136.3	ENSG00000132485.14	ZRANB2	protein_coding	protein_coding	chr1
STRG.2137.1	ENSG00000207721.1	MIR186	miRNA	miRNA	chr1
STRG.2138.1	ENSG00000229956.11	ZRANB2-DT	lncRNA	lncRNA	chr1
STRG.2154.1	ENSG00000233994.2	GDI2P2	processed_pseudogene	processed_pseudogene	chr1
STRG.2157.1	ENSG00000227207.2	RPL31P12	processed_pseudogene	processed_pseudogene	chr1
STRG.2162.1	ENSG00000272864.1	ENSG00000272864	lncRNA	lncRNA	chr1
STRG.2163.3	ENSG00000116791.14	CRYZ	protein_coding	protein_coding	chr1
STRG.2163.4	ENSG00000116791.14	CRYZ	protein_coding	protein_coding	chr1
STRG.2163.5	ENSG00000116791.14	CRYZ	protein_coding	protein_coding	chr1
STRG.2163.6	ENSG00000116791.14	CRYZ	protein_coding	protein_coding	chr1
STRG.2164.1	ENSG00000162623.16	TYW3	protein_coding	protein_coding	chr1
STRG.2164.2	ENSG00000162623.16	TYW3	protein_coding	protein_coding	chr1
STRG.2164.3	ENSG00000162623.16	TYW3	protein_coding	protein_coding	chr1
STRG.2165.1	ENSG00000224149.1	ENSG00000224149	lncRNA	lncRNA	chr1
STRG.2166.1	ENSG00000162624.16	LHX8	protein_coding	protein_coding	chr1
STRG.2166.2	ENSG00000162624.16	LHX8	protein_coding	protein_coding	chr1
STRG.2168.1	ENSG00000272855.1	ENSG00000272855	lncRNA	lncRNA	chr1
STRG.2170.1	ENSG00000226415.1	TPI1P1	processed_pseudogene	processed_pseudogene	chr1
STRG.2172.1	ENSG00000252338.1	RNU6-503P	snRNA	snRNA	chr1
STRG.2173.1	ENSG00000213579.3	ENSG00000213579	processed_pseudogene	processed_pseudogene	chr1
STRG.2175.1	ENSG00000230863.3	ENSG00000230863	transcribed_processed_pseudogene	transcribed_processed_pseudogene	chr1
STRG.2184.1	ENSG00000117054.15	ACADM	protein_coding	protein_coding	chr1
STRG.2184.2	ENSG00000117054.15	ACADM	protein_coding	protein_coding	chr1
STRG.2184.3	ENSG00000117054.15	ACADM	protein_coding	protein_coding	chr1
STRG.2185.1	ENSG00000181227.3	DLSTP1	processed_pseudogene	processed_pseudogene	chr1
STRG.2190.1	ENSG00000137955.16	RABGGTB	protein_coding	protein_coding	chr1
STRG.2190.3	ENSG00000137955.16	RABGGTB	protein_coding	protein_coding	chr1
STRG.2191.1	ENSG00000207241.1	SNORD45A	snoRNA	snoRNA	chr1
STRG.2192.1	ENSG00000201487.1	SNORD45B	snoRNA	snoRNA	chr1
STRG.2203.1	ENSG00000184005.11	ST6GALNAC3	protein_coding	protein_coding	chr1
STRG.2206.1	ENSG00000122420.10	PTGFR	protein_coding	protein_coding	chr1
STRG.2208.1	ENSG00000137959.17	IFI44L	protein_coding	protein_coding	chr1
STRG.2208.3	ENSG00000137959.17	IFI44L	protein_coding	protein_coding	chr1
STRG.2212.1	ENSG00000230787.1	PSAT1P3	processed_pseudogene	processed_pseudogene	chr1
STRG.2214.1	ENSG00000213559.4	HNRNPA1P64	processed_pseudogene	processed_pseudogene	chr1
STRG.2218.1	ENSG00000227288.3	ARID3BP1	processed_pseudogene	processed_pseudogene	chr1
STRG.2221.1	ENSG00000117114.21	ADGRL2	protein_coding	protein_coding	chr1
STRG.2221.2	ENSG00000117114.21	ADGRL2	protein_coding	protein_coding	chr1
STRG.2221.3	ENSG00000117114.21	ADGRL2	protein_coding	protein_coding	chr1
STRG.2221.4	ENSG00000117114.21	ADGRL2	protein_coding	protein_coding	chr1
STRG.2221.5	ENSG00000117114.21	ADGRL2	protein_coding	protein_coding	chr1
STRG.2221.6	ENSG00000117114.21	ADGRL2	protein_coding	protein_coding	chr1
STRG.2226.4	ENSG00000117069.15	ST6GALNAC5	protein_coding	protein_coding	chr1
STRG.2237.1	ENSG00000276081.1	MIR7156	miRNA	miRNA	chr1
STRG.2239.1	ENSG00000142892.15	PIGK	protein_coding	protein_coding	chr1
STRG.2239.2	ENSG00000142892.15	PIGK	protein_coding	protein_coding	chr1
STRG.2240.1	ENSG00000226084.5	ENSG00000226084	processed_pseudogene	processed_pseudogene	chr1
STRG.2239.3	ENSG00000142892.15	PIGK	protein_coding	protein_coding	chr1
STRG.2241.1	ENSG00000228187.1	ENSG00000228187	processed_pseudogene	processed_pseudogene	chr1
STRG.2242.1	ENSG00000289212.1	ENSG00000289212	lncRNA	lncRNA	chr1
STRG.2243.2	ENSG00000154027.19	AK5	protein_coding	protein_coding	chr1
STRG.2244.1	ENSG00000251767.1	RNU7-8P	snRNA	snRNA	chr1
STRG.2245.1	ENSG00000036549.13	ZZZ3	protein_coding	protein_coding	chr1
STRG.2245.2	ENSG00000036549.13	ZZZ3	protein_coding	protein_coding	chr1
STRG.2248.2	ENSG00000077254.14	USP33	protein_coding	protein_coding	chr1
STRG.2248.3	ENSG00000077254.14	USP33	protein_coding	protein_coding	chr1
STRG.2248.4	ENSG00000077254.14	USP33	protein_coding	protein_coding	chr1
STRG.2249.1	ENSG00000180488.16	MIGA1	protein_coding	protein_coding	chr1
STRG.2249.2	ENSG00000180488.16	MIGA1	protein_coding	protein_coding	chr1
STRG.2249.3	ENSG00000180488.16	MIGA1	protein_coding	protein_coding	chr1
STRG.2249.4	ENSG00000180488.16	MIGA1	protein_coding	protein_coding	chr1
STRG.2251.1	ENSG00000219201.4	ENSG00000219201	processed_pseudogene	processed_pseudogene	chr1
STRG.2252.1	ENSG00000235613.2	NSRP1P1	processed_pseudogene	processed_pseudogene	chr1
STRG.2253.1	ENSG00000232015.2	HSPE1P25	processed_pseudogene	processed_pseudogene	chr1
STRG.2256.1	ENSG00000162614.19	NEXN	protein_coding	protein_coding	chr1
STRG.2257.2	ENSG00000162613.18	FUBP1	protein_coding	protein_coding	chr1
STRG.2257.4	ENSG00000162613.18	FUBP1	protein_coding	protein_coding	chr1
STRG.2257.5	ENSG00000162613.18	FUBP1	protein_coding	protein_coding	chr1
STRG.2259.1	ENSG00000273338.1	ENSG00000273338	lncRNA	lncRNA	chr1
STRG.2260.1	ENSG00000162616.9	DNAJB4	protein_coding	protein_coding	chr1
STRG.2263.1	ENSG00000213560.4	ENSG00000213560	processed_pseudogene	processed_pseudogene	chr1
STRG.2278.1	ENSG00000226970.2	NEDD8P1	processed_pseudogene	processed_pseudogene	chr1
STRG.2281.1	ENSG00000137941.17	TTLL7	protein_coding	protein_coding	chr1
STRG.2282.1	ENSG00000271576.2	PRKACB-DT	lncRNA	lncRNA	chr1
STRG.2283.1	ENSG00000142875.20	PRKACB	protein_coding	protein_coding	chr1
STRG.2283.2	ENSG00000142875.20	PRKACB	protein_coding	protein_coding	chr1
STRG.2284.1	ENSG00000213540.3	TXN2P1	processed_pseudogene	processed_pseudogene	chr1
STRG.2283.3	ENSG00000142875.20	PRKACB	protein_coding	protein_coding	chr1
STRG.2286.1	ENSG00000203943.9	SAMD13	protein_coding	protein_coding	chr1
STRG.2286.3	ENSG00000203943.9	SAMD13	protein_coding	protein_coding	chr1
STRG.2286.4	ENSG00000203943.9	SAMD13	protein_coding	protein_coding	chr1
STRG.2291.1	ENSG00000117133.11	RPF1	protein_coding	protein_coding	chr1
STRG.2291.2	ENSG00000117133.11	RPF1	protein_coding	protein_coding	chr1
STRG.2292.1	ENSG00000174021.12	GNG5	protein_coding	protein_coding	chr1
STRG.2292.2	ENSG00000174021.12	GNG5	protein_coding	protein_coding	chr1
STRG.2292.3	ENSG00000285851.1	ENSG00000285851	lncRNA	lncRNA	chr1
STRG.2292.4	ENSG00000174021.12	GNG5	protein_coding	protein_coding	chr1
STRG.2292.5	ENSG00000117151.13	CTBS	protein_coding	protein_coding	chr1
STRG.2299.3	ENSG00000289881.1	ENSG00000289881	lncRNA	lncRNA	chr1
STRG.2301.6	ENSG00000117155.17	SSX2IP	protein_coding	protein_coding	chr1
STRG.2301.7	ENSG00000117155.17	SSX2IP	protein_coding	protein_coding	chr1
STRG.2301.8	ENSG00000117155.17	SSX2IP	protein_coding	protein_coding	chr1
STRG.2301.9	ENSG00000117155.17	SSX2IP	protein_coding	protein_coding	chr1
STRG.2307.1	ENSG00000171517.6	LPAR3	protein_coding	protein_coding	chr1
STRG.2307.2	ENSG00000171517.6	LPAR3	protein_coding	protein_coding	chr1
STRG.2310.1	ENSG00000143013.13	LMO4	protein_coding	protein_coding	chr1
STRG.2310.2	ENSG00000143013.13	LMO4	protein_coding	protein_coding	chr1
STRG.2316.1	ENSG00000289582.1	ENSG00000289582	lncRNA	lncRNA	chr1
STRG.2319.1	ENSG00000235308.1	ENSG00000235308	processed_pseudogene	processed_pseudogene	chr1
STRG.2320.1	ENSG00000137944.18	KYAT3	protein_coding	protein_coding	chr1
STRG.2320.2	ENSG00000137944.18	KYAT3	protein_coding	protein_coding	chr1
STRG.2320.3	ENSG00000213516.10	RBMXL1	protein_coding	protein_coding	chr1
STRG.2320.4	ENSG00000213516.10	RBMXL1	protein_coding	protein_coding	chr1
STRG.2320.5	ENSG00000213516.10	RBMXL1	protein_coding	protein_coding	chr1
STRG.2330.1	ENSG00000234518.2	PTGES3P1	processed_pseudogene	processed_pseudogene	chr1
STRG.2339.1	ENSG00000239504.3	RN7SL583P	misc_RNA	misc_RNA	chr1
STRG.2347.1	ENSG00000065243.20	PKN2	protein_coding	protein_coding	chr1
STRG.2347.2	ENSG00000065243.20	PKN2	protein_coding	protein_coding	chr1
STRG.2347.3	ENSG00000065243.20	PKN2	protein_coding	protein_coding	chr1
STRG.2348.1	ENSG00000207234.1	RNU6-125P	snRNA	snRNA	chr1
STRG.2349.1	ENSG00000241975.1	ELOCP19	processed_pseudogene	processed_pseudogene	chr1
STRG.2353.1	ENSG00000137947.12	GTF2B	protein_coding	protein_coding	chr1
STRG.2355.2	ENSG00000153898.13	MCOLN2	protein_coding	protein_coding	chr1
STRG.2357.2	ENSG00000055732.13	MCOLN3	protein_coding	protein_coding	chr1
STRG.2357.4	ENSG00000055732.13	MCOLN3	protein_coding	protein_coding	chr1
STRG.2357.5	ENSG00000055732.13	MCOLN3	protein_coding	protein_coding	chr1
STRG.2359.1	ENSG00000162643.13	DNAI3	protein_coding	protein_coding	chr1
STRG.2359.3	ENSG00000162643.13	DNAI3	protein_coding	protein_coding	chr1
STRG.2364.1	ENSG00000280099.1	ENSG00000280099	TEC	TEC	chr1
STRG.2365.1	ENSG00000097096.10	SYDE2	protein_coding	protein_coding	chr1
STRG.2365.2	ENSG00000097096.10	SYDE2	protein_coding	protein_coding	chr1
STRG.2367.2	ENSG00000162642.14	C1orf52	protein_coding	protein_coding	chr1
STRG.2369.1	ENSG00000142867.14	BCL10	protein_coding	protein_coding	chr1
STRG.2369.2	ENSG00000142867.14	BCL10	protein_coding	protein_coding	chr1
STRG.2371.1	ENSG00000153904.21	DDAH1	protein_coding	protein_coding	chr1
STRG.2371.2	ENSG00000153904.21	DDAH1	protein_coding	protein_coding	chr1
STRG.2372.1	ENSG00000199459.1	Y_RNA	misc_RNA	misc_RNA	chr1
STRG.2373.1	ENSG00000273264.1	ENSG00000273264	lncRNA	lncRNA	chr1
STRG.2374.1	ENSG00000282057.1	ENSG00000282057	lncRNA	lncRNA	chr1
STRG.2379.1	ENSG00000272691.1	ENSG00000272691	lncRNA	lncRNA	chr1
STRG.2380.1	ENSG00000142871.18	CCN1	protein_coding	protein_coding	chr1
STRG.2388.1	ENSG00000117174.11	ZNHIT6	protein_coding	protein_coding	chr1
STRG.2388.2	ENSG00000117174.11	ZNHIT6	protein_coding	protein_coding	chr1
STRG.2389.1	ENSG00000171502.15	COL24A1	protein_coding	protein_coding	chr1
STRG.2401.6	ENSG00000122417.16	ODF2L	protein_coding	protein_coding	chr1
STRG.2401.7	ENSG00000122417.16	ODF2L	protein_coding	protein_coding	chr1
STRG.2401.9	ENSG00000122417.16	ODF2L	protein_coding	protein_coding	chr1
STRG.2401.10	ENSG00000122417.16	ODF2L	protein_coding	protein_coding	chr1
STRG.2401.11	ENSG00000122417.16	ODF2L	protein_coding	protein_coding	chr1
STRG.2401.12	ENSG00000122417.16	ODF2L	protein_coding	protein_coding	chr1
STRG.2407.1	ENSG00000097033.15	SH3GLB1	protein_coding	protein_coding	chr1
STRG.2407.2	ENSG00000097033.15	SH3GLB1	protein_coding	protein_coding	chr1
STRG.2407.3	ENSG00000097033.15	SH3GLB1	protein_coding	protein_coding	chr1
STRG.2407.4	ENSG00000097033.15	SH3GLB1	protein_coding	protein_coding	chr1
STRG.2407.5	ENSG00000097033.15	SH3GLB1	protein_coding	protein_coding	chr1
STRG.2408.1	ENSG00000230721.1	ENSG00000230721	processed_pseudogene	processed_pseudogene	chr1
STRG.2412.1	ENSG00000183291.18	SELENOF	protein_coding	protein_coding	chr1
STRG.2412.2	ENSG00000183291.18	SELENOF	protein_coding	protein_coding	chr1
STRG.2412.3	ENSG00000183291.18	SELENOF	protein_coding	protein_coding	chr1
STRG.2413.1	ENSG00000153936.18	HS2ST1	protein_coding	protein_coding	chr1
STRG.2413.2	ENSG00000153936.18	HS2ST1	protein_coding	protein_coding	chr1
STRG.2413.3	ENSG00000153936.18	HS2ST1	protein_coding	protein_coding	chr1
STRG.2413.4	ENSG00000267561.2	ENSG00000267561	protein_coding	protein_coding	chr1
STRG.2414.1	ENSG00000235251.2	ENSG00000235251	processed_pseudogene	processed_pseudogene	chr1
STRG.2415.1	ENSG00000225568.1	ENSG00000225568	processed_pseudogene	processed_pseudogene	chr1
STRG.2413.7	ENSG00000267272.5	LINC01140	lncRNA	lncRNA	chr1
STRG.2427.1	ENSG00000197147.15	LRRC8B	protein_coding	protein_coding	chr1
STRG.2430.3	ENSG00000231999.8	LRRC8C-DT	lncRNA	lncRNA	chr1
STRG.2431.1	ENSG00000171488.15	LRRC8C	protein_coding	protein_coding	chr1
STRG.2434.2	ENSG00000231613.1	ENSG00000231613	lncRNA	lncRNA	chr1
STRG.2435.1	ENSG00000272931.1	LRRC8D-DT	lncRNA	lncRNA	chr1
STRG.2436.1	ENSG00000171492.14	LRRC8D	protein_coding	protein_coding	chr1
STRG.2436.2	ENSG00000171492.14	LRRC8D	protein_coding	protein_coding	chr1
STRG.2437.1	ENSG00000272672.1	ENSG00000272672	lncRNA	lncRNA	chr1
STRG.2441.2	ENSG00000228175.3	GEMIN8P4	processed_pseudogene	processed_pseudogene	chr1
STRG.2442.1	ENSG00000162664.17	ZNF326	protein_coding	protein_coding	chr1
STRG.2442.3	ENSG00000162664.17	ZNF326	protein_coding	protein_coding	chr1
STRG.2442.5	ENSG00000162664.17	ZNF326	protein_coding	protein_coding	chr1
STRG.2445.1	ENSG00000143032.8	BARHL2	protein_coding	protein_coding	chr1
STRG.2447.1	ENSG00000233593.12	LINC02609	lncRNA	lncRNA	chr1
STRG.2447.2	ENSG00000233593.12	LINC02609	lncRNA	lncRNA	chr1
STRG.2447.3	ENSG00000233593.12	LINC02609	lncRNA	lncRNA	chr1
STRG.2452.1	ENSG00000232882.1	PHKA1P1	processed_pseudogene	processed_pseudogene	chr1
STRG.2454.1	ENSG00000122482.22	ZNF644	protein_coding	protein_coding	chr1
STRG.2454.2	ENSG00000122482.22	ZNF644	protein_coding	protein_coding	chr1
STRG.2454.3	ENSG00000122482.22	ZNF644	protein_coding	protein_coding	chr1
STRG.2455.1	ENSG00000232393.1	RPL5P6	processed_pseudogene	processed_pseudogene	chr1
STRG.2458.1	ENSG00000230667.7	SETSIP	protein_coding	protein_coding	chr1
STRG.2461.2	ENSG00000289483.1	ENSG00000289483	lncRNA	lncRNA	chr1
STRG.2462.1	ENSG00000172031.7	EPHX4	protein_coding	protein_coding	chr1
STRG.2463.2	ENSG00000162669.16	HFM1	protein_coding	protein_coding	chr1
STRG.2464.1	ENSG00000206817.1	Y_RNA	misc_RNA	misc_RNA	chr1
STRG.2466.1	ENSG00000215873.2	FEN1P1	processed_pseudogene	processed_pseudogene	chr1
STRG.2469.1	ENSG00000097046.13	CDC7	protein_coding	protein_coding	chr1
STRG.2469.2	ENSG00000097046.13	CDC7	protein_coding	protein_coding	chr1
[truncated: 45,307 more rows]

## Sheet: coaggregated  targets
>STRG.194.4
ACTTCCGCCCGGCGCGGGCTTGGATGGAGGCGGCGCGGAGGCCGCGGCTGGGGTTGAGCCGCCGGAGGCCGCGCCCGGCGGGCGGGCCTTCTGGCGGCCGCCCCTGGTTTCTCCTGGGGGGTGATGAGCGGGAGCGGCTCTGGGCCGAGCTACTGCGCACGGTGAGCCCGGAGCTGATCCTGGATCACGAGGTGCCTTCACTGCCCGCCTTCCCAGGACAGGAGCCCAGGTGCGGCCCGGAGCCCACTGAAGTCTTCACTGTCGGACCCAAGACCTTTTCCTGGACACCCTTTCCGCCGGACCTGTGGGGCCCGGGCCGTTCCTACCGGCTGCTTCACGGGGCAGGAGGGCACCTGGAATCCCCCGCCAGGTCCCTGCCCCAGCGCCCGGCACCTGATC…
>STRG.211.2
CTCGCCCGTCTGGGCGTGGGCGTGGCCGGCGTGGCTGCTCGGGACCACCCGAACCCGCGGCCATGGCCCCGGCCGCCGCCAGCCCCCCGGAGGTGATCCGCGCGGCGCAGAAGGACGAGTACTACCGCGGTGGGCTGCGGAGCGCGGCGGGCGGCGCCCTGCACAGCCTGGCGGGTGCGAGGAAGTGGCTGGAGTGGAGGAAGGAGGTTGAGCTGCTCTCAGATGTGGCCTACTTTGGCCTCACCACACTTGCAGGCTACCAGACCCTGGGGGAGGAGTACGTCAGCATCATCCAGGTGGACCCATCGCGGATACATGTGCCCTCCTCGCTGCGCCGTGGCGTGCTGGTGACACTGCATGCCGTCCTGCCCTACCTGCTGGACAAGGCCCTGCTCCCCC…
>STRG.242.1
GCCAGACACCTGCGCCCTTCTGCAGCCGCCCGCCGCATCCGCCGCCGCAGCCCCCAGCATGTCGGGCCCAGACGTCGAGACGCCGTCCGCCATCCAGATCTGCCGGATCATGCGGCCAGATGATGCCAACGTGGCCGGCAATGTCCACGGGGGGACCATCCTGAAGATGATCGAGGAGGCAGGCGCCATCATCAGCACCCGGCATTGCAACAGCCAGAACGGGGAGCGCTGTGTGGCCGCCCTGGCTCGTGTCGAGCGCACCGACTTCCTGTCTCCCATGTGCATCGGTGAGGTGGCGCATGTCAGCGCGGAGATCACCTACACCTCCAAGCACTCTGTGGAGGTGCAGGTCAACGTGATGTCCGAAAACATCCTCACAGGTGCCAAAAAGCTGACCAA…
>STRG.330.1
AGTATCTGTGGGTACCCGGAGCACGGAGATCTCGCCGGCTTTACGTTCACCTCGGTGTCTGCAGCACCCTCCGCTTCCTCTCCTAGGCGACGAGACCCAGTGGCTAGAAGTTCACCATGTCTATTCTCAAGATCCATGCCAGGGAGATCTTTGACTCTCGCGGGAATCCCACTGTTGAGGTTGATCTCTTCACCTCAAAAGGTCTCTTCAGAGCTGCTGTGCCCAGTGGTGCTTCAACTGGTATCTATGAGGCCCTAGAGCTCCGGGACAATGATAAGACTCGCTATATGGGGAAGGGTGTCTCAAAGGCTGTTGAGCACATCAATAAAACTATTGCGCCTGCCCTGGTTAGCAAGAAACTGAACGTCACAGAACAAGAGAAGATTGACAAACTGATGA…
>STRG.356.2
GGGCGGGGCTGGCGCACCGTCTCTACAGCAACGCCTTAGCCAGAGGGTGCTCAGGTTTTCGGGACCGCGCGTGGCGCTCTCAGATGACGTCACACACCCGCGGCGCTTGCGTGACGTAAGCCCTGCTCAGTAAGAAGGCTCCGCAGGTCGGCAGAGAACACCACCACTAATGGGAAGACTGCCCCCTGACCGGCACATGGCCTCAGCATTCATCCACAGATGCTCCTCAAATTGTTTTAAAAACAGCTTTTTTTAAAAGCTGTTTGTCTATGAAGATTAAATGAGTTAATAATATAAGCAAAGCACTTTGCATGGCTACTGGGCACGGTGGTTCATGCCTGTAATTCCAGCACTTTGGGAGGCCGAAGCAGGTGGATCACCTGAGGTCAGGAGTTCAAG…
>STRG.373.2
GGAAGTGCTCCCCCGGCGCGGTCCGCCAGGCCAGTGCCCTCAGGTAGGCGGGGCCCCTGGCCCTAAACTCTGGGACTGGCGGGCGGTCAGGCGGCACAGGGGGAATCCCGGGGGCCTAAGGAGGTTGTCCCAGTTTTTGTCAGCATCTCCACCCCGAGGTGGTTTGAACTTTGAGCCTTTTGTAGTCCTGATGAATAATTTCATTTTCCTCAAGTTTATGACACTCGGAACGTCAAGAACTGGAGGTTTGTGCAATTTGAGACCGGTCGGCACTGTGCAGAGATCAGAGTACTAAGAGACAGAGATTAAAATGGCTTCCAGAGGAAAGACAGAGACAAGCAAATTAAAGCAGAATTTAGAAGAACAGTTGGATAGACTCATGCAACAATTACAAGATCT…
>STRG.449.1
AACGGCTCAGGCGGCTGCGGCTGCTACGGCGGCGCATGCTAGGGGATTCTGCCGGGTAGAAGAGCTGGGCCTGGAACCCAGCCCTGAGGACATCCTGCGGCCCAGGGGCAAGTGACACCTGCTGAGAGAGGCCCAGGATGGTGGAGGCTGAGGAACTGGCACAGCTGCGGCTGCTCAATCTGGAGCTCCTGAGGCAGCTGTGGGTGGGGCAGGATGCTGTGCGGCGGTCAGTGGCCAGGGCAGCCTCGGAGTCAAGCCTGGAATCCAGCAGCAGCTACAACTCAGAGACTCCATCGACCCCAGAGACGTCCTCAACTTCCTTGAGCACCTCCTGCCCACGGGGCCGGTCCTCCGTGTGGGGCCCACCAGATGCCTGTCGAGGGGACCTCCGTGATGTGG…
>STRG.464.1
ACTTCTCACTTCTGCCCATAACAAGAAAAACATAGACTTGTGCCTTACTCTTAAAAAAATAATAATAATAAATATAGGTTTTTTAAAATTTATATATAATTTTTAAAACCCCGTTTGTTGCATGTGGTCCCTTTCCCTCCTGTTGTTGAGCAGAATAAAAGCCCATTTTGCCAGGGCCCGCAGTCCTGGCGGCCCCCGCAGCTGCGGCCCTGTAACTTTAAACCTGGCCTGAGATCATCGTTTTGGCGCCGGCCAAACAGAGCCCGAGGGCGGGCCTAGCGCGCCCGGACGGAGACCACCTTGCGGCCGACCCCGCTCCCCCGCCTCCTCGGGAGAGATAAATGCTGACTCCGCTCGGAAAGTTCTCAACTGCAAAGTTTGCTGTCCGGCTGCCTAGGG…
>STRG.653.1
AACGCGCAGGCGCCGCTGCTATGCTGAGTGCCGCGTCTCGCGTAGTCTCCCGCGCCGCCGTCCACTGCGCGCTTCGCTCTCCGCCGCCCGAGGCCCGCGCGCTCGCCATGTCCCGGCCACCGCCACCGCGGGTCGCCTCGGTGCTGGGCACCATGGAGATGGGGCGCCGCATGGACGCGCCCGCCAGCGCCGCGGCCGTGCGCGCCTTTCTGGAGCGCGGCCACACCGAACTGGACACGGCCTTCATGTACAGCGACGGCCAGTCCGAGACCATCCTGGGCGGCCTGGGGCTCGGGCTGGGCGGTGGCGACTGCAGAGTGAAAATTGCCACCAAGGCCAACCCTTGGGATGGAAAATCACTAAAGCCTGACAGTGTCCGGTCCCAGCTGGAGACGTCAT…
>STRG.701.1
GACTGATTTCGAGTTTCCGGTCAGGTTAGGCCGGGGGGGTGCGGTCCTGGTCGGAAGGAGGTGGAGAGTCGGGGGTCACCAGGCCTATCCTTGGCGCCACAGTCGGCCACCGGGGCTCGCCGCCGTCATGGAGAGCGGAGGGCGGCCCTCGCTGTGCCAGTTCATCCTCCTGGGCACCACCTCTGTGGTCACCGCCGCCCTGTACTCCGTGTACCGGCAGAAGGCCCGGGTCTCCCAAGAGCTCAAGGGAGCTAAAAAAGTTCATTTGGGTGAAGATTTAAAGAGTATTCTTTCAGAAGCTCCAGGAAAATGCGTGCCTTATGCTGTTATAGAAGGAGCTGTGCGGTCTGTTAAAGAAACGCTTAACAGCCAGTTTGTGGAAAACTGCAAGGGGGTAAT…
>STRG.689.1
AGTCCAGCGAGCAGCACGGCGGGAACCGGCAGCCGGAGCAGTCCCGGAGCAGAAGCAGCAGCAGCAGCAGCAGCCCTCGCCGTTCGCGGAGCGCAGCCGAGCCGGCCATGGCGTTGTCGATGCCGCTGAATGGGCTGAAGGAGGAGGACAAAGAGCCCCTCATCGAGCTCTTCGTCAAGGCTGGCAGTGATGGTGAAAGCATAGGAAACTGCCCCTTTTCCCAGAGGCTCTTCATGATTCTTTGGCTCAAAGGAGTTGTATTTAGTGTGACGACTGTTGACCTGAAAAGGAAGCCAGCAGACCTGCAGAACTTGGCTCCCGGGACCCACCCACCATTTATAACTTTCAACAGTGAAGTCAAAACGGATGTAAATAAGATTGAGGAATTTCTTGAAGAAG…
>STRG.888.2
AGGGCGGTTGAGGCTGGGCGGCCCAAGGTGGAAGGAGGGGCCGTGAGGTGAGAGAGTCCGGGAGCCCGAGCTTGAGATGGCCTGATATGAAGGAGTCACGCCTCCCGCCTCCCGGAGCTGCCCAGTGGCTGCCTTGTCCTTCAAGTGCAGGAGCTGGTTCAAATGTCAGGAATGGAAGCCACTGTGACCATCCCAATCTGGCAAAACAAGCCACATGGGGCTGCTCGAAGTGTAGTAAGAAGAATTGGGACCAACCTACCCTTGAAGCCGTGTGCCCGGGCGTCCTTTGAGACCCTGCCCAACATCTCTGACCTGTGTTTGAGAGATGTGCCCCCAGTCCCTACCCTGGCTGACATCGCCTGGATTGCTGCGGATGAAGAGGAGACATATGCCCGGGTC…
>STRG.925.1
GAAATCCGGTTCTAACCGGTCCGGGGCTCCCAGCGCTATAAAAACTTTATAAACCCCCCGGAGCCCGAGCAGTGTGAAGAAGAGGCGAGAACGACCCCCGGACCGACCAAAGCCCGCGCGCCGCTGCATCCCGCGTCCAGCACCTACGTCCCGCTGCCGTCGCCGCCGCCACCATGCCCAAGAGAAAGGCTGAAGGGGATGCTAAGGGAGATAAAGCAAAGGTGAAGGACGAACCACAGAGAAGATCCGCGAGGTTGTCTGCTAAACCTGCTCCTCCAAAGCCAGAGCCCAAGCCTAAAAAGGCCCCTGCAAAGAAGGGAGAGAAGGTACCCAAAGGGAAAAAGGGAAAAGCTGATGCTGGCAAGGAGGGGAATAACCCTGCAGAAAATGGAGATGCCA…
>STRG.979.1
ATGGGGACGAGCGGCACCAGAGCCGGGGCCAGTCGGAGCGGGGCGCGCGCCGCATGGCGGAAGCGGAAGGGAGTTCTCTGCTCTTGTTGCCGCCGCCGCCACCCCCGCCCAGGATGGCGGAAGTGGAGGCGCCGACGGCGGCCGAGACGGACATGAAGCAATATCAAGGCTCCGGCGGCGTCGCCATGGATGTGGAACGGAGTCGCTTCCCCTACTGCGTGGTGTGGACGCCCATCCCGGTGCTCACGTGGTTTTTCCCCATCATCGGCCACATGGGCATCTGCACATCCACAGGAGTCATTCGGGACTTCGCGGGCCCCTACTTTGTCTCAGAGGACAACATGGCCTTTGGAAAGCCTGCCAAGTACTGGAAGTTGGACCCTGCTCAGGTCTATGCTA…
>STRG.993.1
GTTTACTCGCTGCTGTGCCCATCTATCAGCAGGCTCCGGGCTGAAGATTGCTTCTCTTCTCTCCTCCAAGGTCTAGTGACGGAGCCCGCGCGCGGCGCCACCATGCGGCAGAAGGCGGTATCGCTTTTCTTGTGCTACCTGCTGCTCTTCACTTGCAGTGGGGTGGAGGCAGGTAAGAAAAAGTGCTCGGAGAGCTCGGACAGCGGCTCCGGGTTCTGGAAGGCCCTGACCTTCATGGCCGTCGGAGGAGGACTCGCAGTCGCCGGGCTGCCCGCGCTGGGCTTCACCGGCGCCGGCATCGCGGCCAACTCGGTGGCTGCCTCGCTGATGAGCTGGTCTGCGATCCTGAATGGGGGCGGCGTGCCCGCCGGGGGGCTAGTGGCCACGCTGCAGAGCCTC…
>STRG.1046.1
CCAACGTGGATACCCTGGGAGGTCACTCTCCCCAGGCTCTGTCCAAGTGGCATAGGGGAGCTTAGGGCTCTGCCCCATGATGTACAGTCCCTTTCCACAACGTTGAAGATGAAGCTGGGCCTCGTGTCTGCGCCTGCATATTCCTACAGCTTCCCAGAGTCCTGTGGACAATGACTGGGGAGACAAACCATGCAGGAAACATAT
>STRG.1044.7
CCAGCCCGGGAGCGCGCCACATGCAGATCCTGGGATGGCCGCCAGGGGCCGCCGGGCTCTTTGTTTTCCTTTCTCACCCGGGTCGGGGCCAGAGGCCTGCAGAGCGCATGCTCTGGGGCAGTTCGCGGCCCGGCGGGGAGCGCCGGAGTTCCTTGTGGCCGACGTGCACCAAGGACAGGAAGATGTCACCCAAGCGCATAGCTAAAAGAAGGTCCCCCCCAGCAGATGCCATCCCCAAAAGCAAGAAGGTGAAGGTCTCACACAGGTCCCACAGCACAGAACCCGGCTTGGTGCTGACACTAGGCCAGGGCGACGTGGGCCAGCTGGGGCTGGGTGAGAATGTGATGGAGAGGAAGAAGCCGGCCCTGGTATCCATTCCGGAGGATGTTGTGCAGGCTG…
>STRG.1082.1
GTCAGGCTCTGTGTTGGTTGGAGCGAGCATGTGGGTCTGCAGTACCCTGTGGCGGGTGCGAACCCCCGCCCGGCAGTGGCGGGGGCTGCTCCCAGCTTCTGGCTGTCACGGACCTGCCGCCTCCTCCTACTCCGCATCCGCCGAGCCTGCCCGGGTCCGGGCGCTTGTCTATGGGCACCACGGGGATCCAGCCAAGGTCGTCGAACTCAAGAACCTGGAGCTAGCTGCTGTGAGAGGATCAGATGTCCGTGTGAAGATGCTGGCGGCCCCTATCAATCCATCTGACATAAATATGATCCAAGGAAACTACGGATTCCTTCCTGAACTGCCTGCTGTTGGAGGGAACGAAGGTGTTGCACAGGTGGTAGCGGTGGGCAGCAATGTGACCGGGCTGAAGCC…
>STRG.852.1
GCGGTCAGTGGCGGCGCTGAAGAGACCGGTTGCCGCCATGATAGAACAGCAGAAGCGTAAGGGCCCAGAGTTGCCGCTGGTTCCAGTCAAGCGGCAGCGGCATGAGTTGCTGTTGGGAGCGGGGTCTGGCCCAGGAGCCGGGCAGCAGCAGGCGACGCCGGGAGCCTTGCTGCAAGCGGGACCTCCAAGATGTTCCTCCCTTCAAGCCCCAATCATGCTGCTCTCTGGACATGAAGGGGAAGTCTACTGCTGCAAGTTCCACCCCAACGGATCCACCTTAGCATCTGCAGGATTTGACCGACTGATATTACTGTGGAATGTCTATGGTGACTGTGATAACTATGCCACACTGAAGGGACACAGTGGAGCAGTGATGGAATTGCATTACAACACAGATGG…
>STRG.1087.1
GTCAGAATCACCATGGCCAGCTATCCTTACCGGCAGGGCTGCCCAGGAGCTGCAGGACAAGCACCAGGAGCCCCTCCGGGTAGCTACTACCCTGGACCCCCCAATAGTGGAGGGCAGTATGGTAGTGGGCTACCCCCTGGTGGTGGTTATGGGGGTCCTGCCCCTGGAGGGCCTTATGGACCACCAGCTGGTGGAGGGCCCTATGGACACCCCAATCCTGGGATGTTCCCCTCTGGAACTCCAGGAGGACCATATGGCGGTGCAGCTCCCGGGGGCCCCTATGGTCAGCCACCTCCAAGTTCCTACGGTGCCCAGCAGCCTGGGCTTTATGGACAGGGTGGCGCCCCTCCCAATGTGGATCCTGAGGCCTACTCCTGGTTCCAGTCGGTGGACTCAGAT…
>STRG.1149.1
AGCAAATACCTTTTGTTTCTCTCACGTTGGGGCTACTTGTTTTAGGGCGCAAAGGAACGGCCTCGAAAGGGGGTCCTTCCCCAGCCGAGAACCAGGAATCTTCCCTCGGCCCGCGCGCGCGACCGGCCGGTGCGCCGCGGCCCGCGGACAATCCTCCAAACACAGACTGTTTGACTTAGAATCTTCCCTTTTTTACTCCATTCAAGAGCAGCATTCATAAATTTCCAGAATGGAGATCTCCTCTCATCAGTCTCACCTCCTGCAGCAACTGAACGAGCAGCGCAGGCAAGATGTATTTTGTGACTGCAGTATTCTAGTTGAAGGGAAGGTCTTCAAAGCACATCGAAATGTATTATTCGCTAGTAGCGGCTACTTTAAAATGCTTCTTTCTCAGAATTC…
>STRG.1421.2
GTGACACAGCGAAGATGGCGTCGCCCGGCTGCCTGTGGCTCTTGGCTGTGGCTCTCCTGCCATGGACCTGCGCTTCTCGGGCGCTGCAGCATCTGGACCCGCCGGCGCCGCTGCCGTTGGTGATCTGGCATGGGATGGGAGACAGCTGTTGCAATCCCTTAAGCATGGGTGCTATTAAAAAAATGGTGGAGAAGAAAATACCTGGAATTTACGTCTTATCTTTAGAGATTGGGAAGACCCTGATGGAGGACGTGGAGAACAGCTTCTTCTTGAATGTCAATTCCCAAGTAACAACAGTGTGTCAGGCACTTGCTAAGGATCCTAAATTGCAGCAAGGCTACAATGCTATGGGATTCTCCCAGGGAGGCCAATTTCTGAGGGCAGTGGCTCAGAGATGCC…
>STRG.1427.1
GGTGCACGCTGAAGGAGCCGGCGGAACCGGGTGGCCATGGGGATGTGGGCATCGCTGGACGCTTTGTGGGAGATGCCGGCCGAGAAGCGTATCTTCGGGGCCGTGCTGCTCTTTTCCTGGACAGTGTATCTTTGGGAGACCTTCCTAGCACAGCGGCAGAGAAGGATATATAAAACAACAACTCATGTACCACCGGAGTTAGGACAGATCATGGATTCTGAAACATTTGAGAAATCTCGACTCTATCAACTGGATAAAAGCACTTTCAGCTTCTGGTCAGGACTCTATTCAGAGACTGAAGGCACTCTTATTCTTCTCTTTGGAGGAATACCTTATCTCTGGAGACTTTCTGGACGGTTCTGTGGTTATGCTGGCTTTGGACCAGAATATGAGATCACT…
>STRG.1547.1
CGGTCGGAACTGCTCCGGAGGGCACGGGCTCCGTAGGCACCAACTGCAAGGACCCCTCCCCCTGCGGGCGCTCCCATGGCACAGTTCGCGTTCGAGAGTGACCTGCACTCGCTGCTTCAGCTGGATGCACCCATCCCCAATGCACCCCCTGCGCGCTGGCAGCGCAAAGCCAAGGAAGCCGCAGGCCCGGCCCCCTCACCCATGCGGGCCGCCAACCGATCCCACAGCGCCGGCAGGACTCCGGGCCGAACTCCTGGCAAATCCAGTTCCAAGGTTCAGACCACTCCTAGCAAACCTGGCGGTGACCGCTATATCCCCCATCGCAGTGCTGCCCAGATGGAGGTGGCCAGCTTCCTCCTGAGCAAGGAGAACCAGCCTGAAAACAGCCAGACGCCCACC…
>STRG.1548.3
AGATGAGGAAGTGGCAGGCAGGCAGGCTGGCCCCGGGGACTTCTCTCTGGCCCTGCTCCCTCCGAGCGCTCCGCCGTTGCCCGCCTGGCCCCTACGGAGTCCTTAGCCAGGATGGAGGCTGTTGTGAACTTGTACCAAGAGGTGATGAAGCACGCAGATCCCCGGATCCAGGGCTACCCTCTGATGGGGTCCCCCTTGCTAATGACCTCCATTCTCCTGACCTACGTGTACTTCGTTCTCTCACTTGGGCCTCGCATCATGGCTAATCGGAAGCCCTTCCAGCTCCGTGGCTTCATGATTGTCTACAACTTCTCACTGGTGGCACTCTCCCTCTACATTGTCTATGAGTTCCTGATGTCGGGCTGGCTGAGCACCTATACCTGGCGCTGTGACCCTGTG…
>STRG.1576.1
AGTAGTTAGGATGGCTGAAGGGGATACTCACCGGCTGAAGGCCGACTGTGATTCCCCCTACCCCCACAAGGCGATTTTGACCCCCTGAGGGCTGCTCTAGAGGACTCAGGCCCCGAAGCTGTCCCAGGGAGGTCCCCGCTGCATCCCACCACCCAAGCTGTGCCTCATGGAGTCGATGTTTAGCAGCCCTGCCGAGGCGGCGCTGCAGCGAGAGACCGGGGTGCCAGGACTGCTTACTCCTCTTCCGGACCTGGACGGAGTGTACGAGCTGGAGCGAGTCGCTGGATTTGTCCGCGACCTGGGGTGTGAACGAGTTGCCTTGCAGTTCCCTGACCAGCTATTGGGAGATGCTGTGGCTGTGGCTGCACGACTGGAGGAGACGACAGGGTCAAAGATGTT…
>STRG.1588.1
GAGTCGGTGTGTTGTGGACTCGTGGTGCTGGCTGCCGCTGTTCAGGCGGCCGGGAACGGGCGGTGGGGAGCGGGCGGAGCTGGCCCTGCCTCTGCCTGGCCGGCGCCGCAGTCGGCGCGGGCCGCGCCCGCCGCCGCCAACTGCCCTGAGCGCTTGCTGAGGCCGAGGGAGACGTCGGGGCCTGCACCTGGAGGGAGCCTGCCGCGCTGGCCCCGAGGAGGGGGCGTTGCCATGGCGACAGCCTCTCCCGCTGCTGACGGGGGGCGGGGGCGGCCCTGGGAAGGAGGGCTGGTCTCCTGGCCCCCCGCCCCTCCCCTTACTCTCCCCTGGACTTGGATGGGCCCGAGTTGGGGGCAACACCCCGGGCATTGGGGCTTTCCAGCTCTCACAGAACCTTCA…
>STRG.1631.1
AGAGGCGGCGTGGAGATCGCTGGGAGCGGTTGCGGCGTGCCGGGAGCTGAGTTATAGCTGTGACTTCTGCCCTGCCAGGCCGCACACAAGCTGGCTGACCCGGTTTGTAAAAATGGAATTTCAAGCAGTAGTGATGGCAGTAGGTGGAGGATCTCGGATGACAGACCTAACTTCCAGCATTCCCAAACCTCTGCTTCCAGTTGGGAACAAACCTTTAATTTGGTACCCATTGAACCTGCTTGAGCGTGTTGGATTTGAAGAAGTCATTGTGGTTACAACCAGGGATGTTCAAAAGGCTCTATGTGCAGAATTCAAGATGAAAATGAAGCCAGATATTGTGTGTATTCCTGATGACGCTGACATGGGAACTGCAGATTCTTTGCGCTACATATATCCAAA…
>STRG.1650.1
CTTTCGCGGCCCGGGAGCTCAGCAGAGCTACCAGCTGCCCTGTTGGCTTCGCTGGTCGGATCGTCCTCCTGGCCCCGCCAAACAGGCGGGGGGAGCGGCCCCGACTGTGGGGCCATGGCAGTAGTCTCCTCGTTCGCCGCCGCCGCTAGCCTAGCTGAGTCGCCGGCTTCTGCGCTAGGGGCTCCCACCGCCTCCGCAGGCTAAGGAGCCGCTGCCACCAACGAGCTGTGAGGGTTACTATGCTCCCTCTTTGCCGCCGTCTCCTCCTCTTGCCCGCGCAGGCACCCCTCTGGCTGCTCAGTCCTGCCTCAGTGTCAAACCAGAAGAGAAGTAAAATTCAACAAAAATTTATGTGTGGAGTTCCTTCTTAAAAGAAGAAAAAAGTGATTATTTAGACTA…
>STRG.1666.1
ACTTGCCGGAAGTGCCTTTCCAGTGGACCTGGGCTGTTGTTGCGGTTGTTTTCCTTCTCTCCGTGCAACGCTGGCAAGTCTCAAAGTCGCCACAGAAACATGCCCCTGATTCAGTGCCTCTGCTTAGCTGTAACATGTTAATCAGAACTACCTGGCATCTTCCTGAACAAGACTTTCAATAGGGGCCAGTATGCTTCGCTTCATCCAGAAGTTTTCTCAAGCATCTTCAAAGATACTGAAGTACTCTTTCCCAGTGGGACTAAGAACCAGCAGAACAGATATACTTTCTCTCAAGATGTCTCTCCAGCAAAACTTTTCCCCATGTCCAAGGCCTTGGCTTTCCTCATCATTTCCAGCGTATATGAGCAAGACACAGTGCTATCATACATCCCCCTGCAG…
>STRG.1679.1
GGGGCCGCAAGCGGCATGGAGGAGGCGGAGGCCGCGGCGAGCCGGGCCGAGCAGTGAGGGCCCTAGCGGGGCCCGAGCGGGGCCCGGGGCCCCTAAGCCATTCCTGAAGTCATGGGCTGGCCAGGACATTGGTGACCCGCCAATCCGGTATGGACGACTGGAAGCCCAGCCCCCTCATCAAGCCCTTTGGGGCTCGGAAGAAGCGGAGCTGGTACCTTACCTGGAAGTATAAACTGACAAACCAGCGGGCCCTGCGGAGATTCTGTCAGACAGGGGCCGTGCTTTTCCTGCTGGTGACTGTCATTGTCAATATCAAGTTGATCCTGGACACTCGGCGAGCCATCAGTGAAGCCAATGAAGACCCAGAGCCAGAGCAAGACTATGATGAGGCCCTAGGCC…
>STRG.1858.1
AGTGCCCGAGCCGGCCTCGTTCTGGCTGCCGCCGTCTCGCTGAGGCGGAGTAGGATGAGGCCCGCGGCCGTGGCTCCGGCGTCGGCGGGGGCAGCAGCAGCTGAGGCAGCAGCTGAGGCAGCCGCGACGGCCGCGCCCCCCCCCGCTGACCTGGATTAGGCCCAGCAGCTCCGTGGCCGCCGCCGCCCCGCGGGGGGGCGGGGTGGGGAAGTGCTTCGTCTCCCCGCCCCCCCCCCCCCATCGCTGCCTCGCAGGAGGCGAACGCCGCGACCCCAGCGGAGCCCGCGGCCCAGCCTTGATCCCCCAACCCCGGGGGCTGGCATGAGCGGCCCCTCGGCGGCACCGTGGGGCGGTGGAGTCGCCTCCGCCTGATCCCCGGCCTGTCGCCCGACCCCACCT…
>STRG.1934.1
CTCCTGTACGCCCTAGACTAGGGGCCGCCATCTCCATGGCCACGGCCGTGAGCCGGCCCTGCGCCGGCAGGTCGCGGGACATACTGTGGCGCGTTTTGGGCTGGAGGATAGTTGCAAGTATTGTTTGGTCAGTGCTATTTCTACCCATCTGCACCACAGTATTTATAATTTTCAGCAGGATTGATTTGTTTCATCCTATACAGTGGCTGTCTGATTCTTTCAGTGACCTGTATAGTTCCTATGTAATCTTTTACTTCCTGCTGCTGTCAGTGGTAATAATAATAATAAGTATTTTCAATGTGGAGTTCTATGCAGTTGTGCCTTCTATTCCTTGCTCCAGACTAGCTCTGATAGGGAAGATCATTCATCCTCAGCAACTCATGCACTCATTTATTCATG…
>STRG.1936.3
CCGGCAACTGGGCTGGACCGAAACCGGCGCGGAGCAACTGAGGCCCGAGCCTTCTCGGGACCCGGGGGACGCCTAACCCCGCGAGATGAGGAAACTGAGGCCGCGAGGAGCGCGCATACAGCAGAGAAGCAGCAGAATCGGGAATCAAACCCAGCTCTGTCTGACCCCAGAGCCTGTGCCTTTAACCACTGGCTAGGCTGAACTGCCTTTGTTCTTCACTGTCCCCATCACCTCTTTCAAACCTCAGCCTCTCCTTCCTCATCGTTACATCTCTAGGCTGCACCTGCTCTCTAAACATTCACACAAACCCTGCAAATTTTCTTCCTCATAATTGGGAGAAGACTCACTGGCCGAATGGCAGCAGTAGATGACTTGCAATTTGAAGAATTTGGCAATGCA…
>STRG.1938.2
CTTGCTCCCGCCCCCGCCGGTCCCGCGGTCCCACGGCGCCTGGTTGCCCCCAGCCCCCTCCCTCCTCCCACCTTCACTGTGTCCCACCCTTCCTAGCTTTGTGCCCGGGGTGCTGAGCCCTTCCCCGTCAGCCGGGCCGCGGGAGGAGGGAGCCGTCACCGAGGAGCTGCCGCTCGCTGCCCCGGGCAGGGGCACAGTTGCAACCAAGGCAATGTCTTACTACCTCAGCTCAGAAAACCACCTGGACCCAGGGCCCATCTACATGCGAGAAAATGGGCAGCTGCACATGGTCAATCTGGCTCTGGATGGTGTCAGGAGTAGCCTGCAGAAGCCAAGGCCTTTCAGACTGTTCCCCAAAGGCTTTTCTGTGGAGCTTTGCATGAACAGGGAAGACGACAC…
>STRG.1941.1
GACAGAGGGGAACAAGATGGCGGCGCCGAAGGGGAGCCTCTGGGTGAGGACCCAACTGGGGCTCCCGCCGCTGCTGCTGCTGACCATGGCCTTGGCCGGAGGTTCGGGGACCGCTTCGGCTGAAGCATTTGACTCGGTCTTGGGTGATACGGCGTCTTGCCACCGGGCCTGTCAGTTGACCTACCCCTTGCACACCTACCCTAAGGAAGAGGAGTTGTACGCATGTCAGAGAGGTTGCAGGCTGTTTTCAATTTGTCAGTTTGTGGATGATGGAATTGACTTAAATCGAACTAAATTGGAATGTGAATCTGCATGTACAGAAGCATATTCCCAATCTGATGAGCAATATGCTTGCCATCTTGGTTGCCAGAATCAGCTGCCATTCGCTGAACTGAGACA…
>STRG.1839.8
ACACCCGCCGGGCCGTTGTTCCCGAGACGTTGTTGAGTCCCCTGTGTCCTCTTCTGGGTGGAGGAACTGCAATGTCTGGTGGAGAACAGAAACCAGAGAGGTACTATGTGGGTGTGGACGTTGGAACAGGCAGTGTCCGTGCAGCTCTGGTGGACCAGAGTGGGGTCCTGTTGGCTTTTGCAGACCAGCCAATTAAGAATTGGGAGCCCCAGTTCAACCACCATGAGCAGTCCTCCGAGGACATCTGGGCTGCGTGCTGTGTTGTCACAAAGAAAGTTGTACAAGGGATTGATTTAAACCAAATTCGAGGACTTGGGTTTGATGCCACGTGTTCTCTGGTTGTTTTGGATAAGCAGTTTCACCCATTACCAGTCAACCAGGAAGGGGATTCCCATCGAA…
>STRG.2011.1
AGAGCAGCTGCAGCCTCAGCCGGCCGCCCCTCCGCCAGCCAAGTCCGCCGCTCTGACCCCCGGCAGCAAGTCGCCACCATGGTGAAGATCGTGACAGTTAAGACCCAGGCGTACCAGGACCAGAAGCCGGGCACGAGCGGGCTGCGGAAGCGGGTGAAGGTGTTCCAGAGCAGCGCCAACTACGCGGAGAACTTCATCCAGAGTATCATCTCCACCGTGGAGCCGGCGCAGCGGCAGGAGGCCACGCTGGTGGTGGGCGGGGACGGCCGGTTCTACATGAAGGAGGCCATCCAGCTCATCGCTCGCATCGCTGCCGCCAACGGGATCGGTCGCTTGGTTATCGGACAGAATGGAATCCTCTCCACCCCTGCTGTATCCTGCATCATTAGAAAAATCAAA…
>STRG.2041.4
AGGCTGCCCGGGCCGTGGCAGGAAGCCGGAAGCAGCCGCGGCCCCAGTTCGGGAGACATGGCGGGCGTTAAAGCTCTCGTGGCATTATCCTTCAGTGGGGCTATTGGACTGACTTTTCTTATGCTGGGATGTGCCTTAGAGGATTATGGCGTTTACTGGCCCTTATTCGTCCTGATTTTCCACGCCATCTCCCCCATCCCCCATTTCATTGCCAAAAGAGTCACCTATGACTCAGATGCAACCAGTAGTGCCTGTCGGGAACTGGCATATTTCTTCACTACTGGAATTGTTGTTTCTGCCTTTGGATTTCCTGTTATTCTTGCTCGTGTGGCTGTGATCAAATGGGGAGCCTGCGGCCTTGTGTTGGCAGGCAATGCAGTCATTTTCCTTACAATTCAA…
>STRG.2065.6
GCGGCTCCTGCGCGTTCCCGCCGAGGCAGTGGCGGCGGGAGCGGCAGAGACGGCAGCGGCCGGAGTCCCGTTGCTGAGTCTCACATCCGGGTTCTGGCCGTGACCCAGCTGCGGCCGCCGCGGAGATGTGACCCGGCAGTACGGCAAATATGGCGGAGCCATCTGTTGAATCTTCAAGTCCAGGAGGTTCAGCAACATCAGATGACCATGAATTTGATCCATCAGCTGACATGCTGGTTCATGATTTTGATGATGAACGAACATTAGAAGAGGAAGAAATGATGGAAGGAGAAACAAACTTCAGCTCTGAAATAGAAGATCTTGCAAGGGAAGGCGACATGCCAATTCATGAACTTCTCAGCCTTTATGGTTATGGTAGTACTGTTCGACTACCTGAAG…
>STRG.2086.1
AGCGAGGCGGAGCCGGCGCCCGGAGGAGCAAGAGGAGGAGGAGGAGGAGAGGTCGGAGCCGTCTCCAGGAGCCCTTAGAGACCGAGTCCCGGCGGCGACGGCGGGGCAGCGCACCGGCAGGCGGATTCATTCCACTTAAAACCTGAAAACATTGGACCACACAAAGTCTTACTGATTTCAGGTAAAAACAATAATTGAAGATGTCCAGCAAAACAGCAAGCACCAACAATATAGCCCAGGCAAGGAGAACTGTGCAGCAGTTAAGATTAGAAGCCTCCATTGAAAGAATAAAGGTTTCGAAGGCATCAGCGGACCTCATGTCCTACTGTGAGGAACATGCCAGGAGTGACCCTTTGCTGATAGGAATACCAACTTCAGAAAACCCTTTCAAGGATAAAA…
>STRG.2113.3
GCGTGCTGTGCGGCGCGGTCTCAGGGAAGGTGGGGCTATGGCAGCTGCTAGGGACCCTCCGGAAGTATCGCTGCGAGAAGCCACCCAGCGAAAATTGCGGAGGTTTTCCGAGCTAAGAGGCAAACTTGTAGCACGTGGAGAATTCTGGGACATAGTTGCAATAACAGCGGCTGATGAAAAACAGGAACTTGCTTACAACCAACAGCTGTCAGAAAAGCTGAAAAGAAAGGAGTTACCCCTTGGAGTTCAATATCACGTTTTTGTGGATCCTGCTGGAGCCAAAATTGGAAATGGAGGATCAACACTTTGTGCCCTTCAATGTTTGGAAAAGCTATATGGAGATAAATGGAATTCTTTTACCATCTTATTAATTCACTCTGGTGGCTACAGTCAACGACT…
>STRG.2203.1
GGATCTGCGGGAATGTGGGCTGGAGAGGTCCTGCCGTGGTACCAGCCTCCAGCCTGCCCCCAGGACTGCCCCTGACCCAGGCGCGCCCGCTGCTCGGTGGCAGGAGGGCCGGCGGAGCGCCATGGCCTGCATCCTGAAGAGAAAGTCTGTGATTGCTGTGAGCTTCATAGCAGCGTTCCTTTTCCTGCTGGTTGTGCGTCTTGTAAATGAAGTGAATTTCCCATTGCTACTAAACTGCTTTGGACAACCTGGTACAAAGTGGATACCATTCTCCTACACATACAGGCGGCCCCTTCGAACTCACTATGGATACATAAATGTGAAGACACAAGAGCCTTTGCAACTGGACTGTGACCTTTGTGCCATAGTGTCAAACTCAGGTCAGATGGTTGGCCAGAA…
>STRG.2283.1
GTCTGCCCGCCGCCGCCACTGCTGCTGCCACCGCCGTCGCCGCCGCCGCCGCCGCCGCCGCTGCTGCTGCCGGTGCTAAGGAGTTCGCTGGAGCCCTTTCCTCAGACCCGGCCCGGTCTTCGCGCCCGGACTCCTGGCGCCAGCGCTAGGCGCACTCACCGCTCTGACGGGTGCAGACGCGGGAGTTGTCCCAGACTGTGGAGTGGCGGGCACGGCCCCAGCCCCCCTTCCCTTCCCTGACCCCTTCTTGCCATCGCCCCAGACATGGGGAACGCGGCGACCGCCAAGAAAGGCAGCGAGGTGGAGAGCGTGAAAGAGTTTCTAGCCAAAGCCAAAGAAGACTTTTTGAAAAAATGGGAGAATCCAACTCAGAATAATGCCGGACTTGAAGATTTTGAA…
>STRG.2292.1
CTCACTTCCCTCAACCCTTCCCACAAACTGGGAGGAAAACTGAGACCTCCTGGTCACCCGCCGCCGGGCCTTTTAGAAACTCCCACAAGCTCTGCCTTCCCTCCCTGGTCCTCTTCAGACCCCCTCTTAGTTCTTCGCGGCTAACGGCTCGCGCTCGGGGCCGGGTGTGGAGCTGGAACAGAGGGCTGGCAAGGCGCGCATGCGCACCGAGGGTGGAGCCGCTGAGCACAGAACCGGAAACTTAGAGACAAAGTTCGGAGCCCCGCCCCCGCCGCGCGCCGCTGAGTTGTCTGGCCCCGCCGACCCACGGCCCACGACCCACCGACCCACGAATCGGCCCGGCCGTCGCGTGCACCATGTCTGGCTCCTCCAGCGTCGCCGCTATGAAGAAAGTGGTTC…
>STRG.2310.1
GCAGCAGCGATTGCAGCAGTTGCTGCCGCTGCGCCGCGCCTGAAGCCGCGCCGCGCGGGCCGAGGGCTCCTGCAGCTGCTCGCGCGCAGTCGGAGGCGGAGAAGGACGAAGACTGAGACTGACACTTCTGCTCCCGGCCGCCCGGCACTTACGCGGGGGCCCCCCAACCCGCCCCAGAGCAACGCGATTTAAAAAAAAAAAAAAAGCCGCCCTTAGCCCCCTCCTCCCCTTTCCTGCTTCTGCGAGAACTCCCTCCCTCCCTCCAGCTCCGCCAGCCCAGGCGCCCCTTCCCTGGAAGCCGAGCGGCTTCGCTCGCATTTCACCGCCGCCGCCTCTCGCAATATTGCAATATAGGGGAAAAGCAGACCATGGTGAATCCGGGCAGCAGCTCGCAGCCGC…
>STRG.2505.3
GACTGCAGCGCGGCGGGGCGATGTGTGATTACCATGGCGAGGAGTCTCTGTCCGGGGGCCTGGCTAAGGAAACCCTATTACCTCCAGGCTCGCTTCTCATATGTGCGGATGAAATATCTTTTCTTTTCCTGGTTAGTGGTTTTTGTTGGAAGCTGGATTATATATGTGCAGTATTCTACCTATACAGAATTATGCAGAGGAAAGGACTGTAAGAAAATAATATGTGACAAGTACAAGACTGGAGTTATTGATGGGCCTGCATGTAACAGCCTTTGTGTTACAGAAACTCTTTACTTTGGAAAATGTTTATCCACCAAGCCCAACAATCAGATGTATTTAGGGATTTGGGATAATCTACCAGGTGTTGTGAAATGTCAAATGGAACAAGCGCTTCATCTT…
>STRG.2555.4
GCCGCTGACCCGCCGCCTCCGTCTGCCTCCTCCCGGGCTCTGGGCCCAGCGCGCCCAGATGCCGGGCAGGACCCCTCCGCCCGCTGCTGGAACACCAATAGCAGCGTTGGAGCCTCTGGGCCGGAGGAACTGGGGCCTCCACCGACACCTGCTTCTTCCCTCACCTCGCAGCCTTCCACACCTGTTGATCTGACCTCTGCCCCGCTGCCGCCCAGGAGTAACCTAAGGCTTTTGGCCTGATTCGAGCTCACTCCGTCTAAACCTCTAAATGCGGTGCGAAAAAATCCTGGGGAATGTGCCATGCAAAGCCTGGGCATTTCAAGTGCTTTTCTGGATTCGCATCAACTCCTCTTTACAGGCATCTTTATCCGGAATTCAGCTCGTCCCAAACCCCACGTG…
>STRG.2604.9
GGAGGCAGGCCGGGCCCTCAAGATGGCGGCGGGCGCCCAGAGCGGCTCGGCCCGGCAGTAGTGGTGGGACGGCACTAGCTGCTGGGGCCTGCCGCCCCGGGAGTGGCTGCAGCAGCGCCAGGAATCGAGGATGGTAAAATGACCCAGGGGAAGAAGAAGAAACGGGCCGCGAACCGCAGTATCATGCTGGCCAAGAAGATCATCATTAAGGACGGAGGCACGCCTCAAGGAATAGGTTCTCCTAGTGTCTATCATGCAGTTATCGTCATCTTTTTGGAGTTTTTTGCTTGGGGACTATTGACAGCACCCACCTTGGTGGTATTACATGAAACCTTTCCTAAACATACATTTCTGATGAACGGCTTAATTCAAGGAGTAAAGGGTTTGTTGTCATTCCTT…
>STRG.2577.4
ACTCGGGGACTGTCCCTTGCTCCAGGCGCTCACTTTGCGGGCGGCACTTTTTCCAGGTTGTTAATCCAGCTAATGGAGAAGGATAGATGCACGCTACTTGGTTTAGAAAAAAAAACAAAAATGAGCAAACGAGACGCCCCTTCCGTTTTATGATAACTAAGCTGCAGGGAAATAAATCGGCTGGCCCTACTGCAATCTACTGCACTCGAGTGACAAGTGAGCCTGCTTCTGTCAATTACTGAAGCTATAAGGAGATTTTTTAAAAATTAAACTTCAACACAATGAGGTGTTGCCACATCTGCAAACTTCCTGGGAGAGTAATGGGGATTCGAGTGCTTCGATTATCTTTGGTGGTCATCCTCGTATTATTACTGGTAGCTGGTGCTTTGACTGCCTTAC…
>STRG.2663.1
ACACCCTGCGCTCCGCGCGGGCTCGGGTGGGGTCTCCGCTCCTGCGCCCTGCGCCCTGCGCGCCGCAGCCGCAACCCCGACGGCGCCCCAAACGCTGTTGCGCCGCGCGCCCCGCCCAGCCCGGCCTCGCGCTGGTCCCGGTCTCGCCCCGCAGCCCTCGATCTCCCGTGACTTCCTCGGCCAGGCCGCCTGCGCCTCTGGGACCATGTTGCGCTGGCTGCGGGACTTCGTGCTGCCCACCGCGGCCTGCCAGGACGCGGAGCAGCCGACGCGCTACGAGACCCTCTTCCAGGCACTGGACCGCAATGGGGACGGAGTGGTGGACATCGGCGAGCTGCAGGAGGGGCTCAGGAACCTGGGCATCCCTCTGGGCCAGGACGCCGAGGAGAAAATTTTTAC…
>STRG.2664.1
CGCTCAGGCGGCGCCCCGGCGGCGACCCACCTCCTCGGCGTCCTGGCCCAGAGGGATGCCCAGGTTCCTGAGCCCCTCCTGCAGCTCGCCGATGTCCACCACTCCGTCCCCATTGCGGTCCAGTGCCTGGAAGAGGGTCTCGTAGCGCGTCGGCTGCTCCGCGTCCTGGCAGGCCGCGGTGGGCAGCACGAAGTCCCGCAGCCAGCGCAACATGGTCCCAGAGGCGCAGGCGGCCTGGCCGAGGAAGTCACGGGAGATCGAGGGCTGCGGGGCGAGACCGGGACCAGCGCGAGGCCGGGCTGGGCGGGGCGCGCGGCGCAACAGCGTTTGGGGCGCCGTCGGGGTTGCGGCTGCGGCGCGCAGGGCGCAGGGCGCAGGAGCGGAGACCCCACCCGAGCC…
>STRG.2736.1
GATTCCCGGGACTAGGTTGCGGGAGAAAGCCTGTTGCGTGGAAGATAAGGCGGCGCGGGAAGTGGACACAGGGTGGGCTGGAGCTCAGATCTAACTGGACTCTCGCTCCTGCTGGCTGGACATGGAGGATTTGGAGGAAGATGTAAGGTTTATTGTGGATGAGACCTTGGACTTTGGGGGGCTGTCACCATCTGACAGCCGTGAGGAGGAAGACATAACAGTGTTGGTGACTCCAGAGAAACCACTTCGACGGGGCCTCTCCCACCGAAGTGACCCAAATGCAGTGGCACCTGCCCCCCAGGGTGTGAGGCTCAGCCTAGGCCCCCTCAGTCCAGAGAAGCTGGAGGAGATCCTCGATGAGGCCAACCGGCTGGCCGCTCAGCTGGAGCAGTGTGCCCT…
>STRG.2750.1
GGCGGATCTGCAGAGTTTCGAGGTTCTGTCAAGTTCGCTGCCCGCCGCCCAACTTGAAGCCTCATTTACCTTTCGGCTACCTGATTTGGATAAATGGAGAAAAACCGGGGCCTCTAACTCATAATGCCCTCCCGCGTTCAAGATGCCAGTTTTGGGGCGGAGATTTCTAAATTAAAGCCTACATCCCGCGCGGGAATATCTGCTGGTAATTTCTCGCCTGCCAGAAAACTCCTTTGATCTCTGGCTGTGGAGACTCGGGACCCCTACCCAAGTATGGGACACTGCCTCCGTTGGGGTTATCTCAGATCAATGGAATGGGAACAAGCTATCCGGCCTGGGCGCCGTTCACGTCTCACATCTGAGATCGTAACACCGACTGTGCTTAGGACCTCAGCAATA…
>STRG.2685.5
AGAGGTGCACCACGTGGGGTTTGCTGCCGGAGCGGAGTCTCCGGCCGGCGTCCAGTTTGAGTCTAGGTTGGAGTTGGAACCGTGGAGATGCGGAAGGAAACCCCACCCCCCCTAGTGCCCCCGGCGGCCCGGGAGTGGAATCTTCCCCCAAATGCGCCCGCCTGCATGGAACGGCAGTTGGAGGCTGCGCGGTACCGGTCCGATGGGGCGCTTCTCCTCGGGGCCTCCAGCCTGAGTGGGCGCTGCTGGGCCGGCTCCCTCTGGCTTTTTAAGGACCCCTGTGCCGCCCCCAACGAAGGCTTCTGCTCCGCCGGAGTCCAAACGGAGGCTGGAGTGGCTGACCTCACTTGGGTTGGGGAGAGAGGTATTCTAGTGGCCTCCGATTCAGGTGCTGTTGAA…
>STRG.2863.1
GCTTTACAATAGAAGCTCGGTTGGAGAGGCCTGCGGAGAAAAGCTGGGAACGGCCGCTTCCGGCATGTTCATCTCTGGACGAAGAACGGCCGACAAGTGGAGGGCGGAGGAGAGACTCCAATGCCCAGCGGGCAGTGCGCGGGCGGCGCTTGCGCGATGCGCGGACGGGGGGGCGGTCGGGCCATTTAAATGTGTGTTTGTGGGTGAAATGGCTGCGCAGGTCGGAGCGGTGCGCGTAGTACGGGCGGTGGCGGCGCAGGAGGAGCCGGACAAAGAGGGGAAGGAGAAACCTCATGCTGGGGTCTCCCCGCGGGGAGTTAAACGGCAGCGCCGATCTAGCAGTGGGGGGTCTCAGGAGAAGCGGGGGCGGCCGAGCCAGGAGCCCCCTCTCGCTCCCCC…
>STRG.2801.1
GACTGTACGTTCCTTCTACTCTGGCACCACTCTCCAGGCTGCCATGGGGCCCAGCACCCCTCTCCTCATCTTGTTCCTTTTGTCATGGTCGGGACCCCTCCAAGGACAGCAGCACCACCTTGTGGAGTACATGGAACGCCGACTAGCTGCTTTAGAGGAACGGCTGGCCCAGTGCCAGGACCAGAGTAGTCGGCATGCTGCTGAGCTGCGGGACTTCAAGAACAAGATGCTGCCACTGCTGGAGGTGGCAGAGAAGGAGCGGGAGGCACTCAGAACTGAGGCCGACACCATCTCCGGGAGAGTGGATCGTCTGGAGCGGGAGGTAGACTATCTGGAGACCCAGAACCCAGCTCTGCCCTGTGTAGAGTTTGATGAGAAGGTGACTGGAGGCCCTGGGAC…
>STRG.2896.1
GGGGCCGGAAGTGCCGCTCCTTGGTGGGGGCTGTTCATGGCGGTTCCGGGGTCTCCAACATTTTTCCCGGCTGTGGTCCTAAATCTGTCCAAAGCAGAGGCAGTGGAGCTTGAGGTTCTTGCTGGTGTGAAATGACTGAGTACAAACTGGTGGTGGTTGGAGCAGGTGGTGTTGGGAAAAGCGCACTGACAATCCAGCTAATCCAGAACCACTTTGTAGATGAATATGATCCCACCATAGAGGATTCTTACAGAAAACAAGTGGTTATAGATGGTGAAACCTGTTTGTTGGACATACTGGATACAGCTGGACAAGAAGAGTACAGTGCCATGAGAGACCAATACATGAGGACAGGCGAAGGCTTCCTCTGTGTATTTGCCATCAATAATAGCAAGTCAT…
>STRG.2927.1
CTTCTCAAGATGGCGCTGCACTCAATGCGGAAAGCGCGTGAGCGCTGGAGCTTCATCCGGGCACTTCATAAGGGATCCGCAGCTGCTCCCGCTCTCCAGAAAGACAGCAAGAAGCGAGTATTTTCCGGCATTCAACCTACAGGAATCCTCCACCTGGGCAATTACCTGGGAGCCATTGAGAGCTGGGTGAGGTTACAGGATGAATATGACTCTGTATTATACAGCATTGTTGACCTCCACTCCATTACTGTCCCCCAAGACCCAGCTGTCCTTCGGCAGAGCATCCTGGACATGACTGCTGTTCTTCTTGCCTGTGGCATAAACCCGGAAAAAAGCATCCTTTTCCAACAATCTCAGGTGTCTGAACACACACAATTAAGTTGGATCCTTTCCTGCATG…
>STRG.3017.3
CCAGTTACTCTAGCGCGCCAGGCCGAACCGCAGCTTCTTGGCTTAGGTACTTCTACTCACAGCGGCCGATTCCGAGGCCAACTCCAGCAATGGCTTTTGCAAATCTGCGGAAAGTGCTCATCAGTGACAGCCTGGACCCTTGCTGCCGGAAGATCTTGCAAGATGGAGGGCTGCAGGTGGTGGAAAAGCAGAACCTTAGCAAAGAGGAGCTGATAGCGGAGCTGCAGGACTGTGAAGGCCTTATTGTTCGCTCTGCCACCAAGGTGACCGCTGATGTCATCAACGCAGCTGAGAAACTCCAGGTGGTGGGCAGGGCTGGCACAGGTGTGGACAATGTGGATCTGGAGGCCGCAACAAGGAAGGGCATCTTGGTTATGAACACCCCCAATGGGAACAGCC…
>STRG.3095.1
ATGGCCCGTACTAAGCAGACTGCCCGCAAGTCGACCGGCGGCAAGGCCCCGAGGAAGCAGCTGGCTACCAAAGCGGCCCGCAAGAGCGCGCCGGCCACGGGCGGGGTGAAGAAGCCGCACCGCTACCGGCCGGCACCGTGGCTCTGCGGGAGATCTGGCGCTACCAGAAGTCTACGGAGCTGCTGATCCGCAAGCTGCCCTTCCAGCGGCTGGTACGCGAGATCGCGCAGGACTTTAAGACGGACCTGCGCTTCCAGAGCTCGGCCGTGACGGCGCTGGCGCTGCAGGAGGCCAGCGAGGCCTACCTGGTGGGGCTGTTCGAAGACACGAACCTGTGCGCCATCCATGCCAAGCGCGTGACCATCATGCCCAAGGACATCCAGTTGGTCAGCCGCATCC…
>STRG.3398.1
ATACTTACCTGGCAGGAGAGATACCCTGGTCACGAAGGTGGTTTTTCCAGAGCGAGTCTTATCCATTGCACTCCGGATCTGCTGACCCCTGCAGTTTCCCCAAATGTGGGAAACTTGACTGTATAATTTGTGGCAGTGGTAGACTGCATTCGCGCTTTCCCCTGTATTTTTGTCGTTTTAAAAATAGGTTTTGTTTGCTGCAGAAACGCATACTGGGCGTCAGCGTAAGCTGAGAATCAGGTCTTTGTTCCCATCTGTAACTTCACTGAAACTAAAAATTTGGGACATCGTGGTTCTCACGTTTGTAATCCCAGCAATCTATGAGGTACGTCGATAGGTTATGTTTATGTTAATATCGCTCGACCTCAGGCGTGTGTGGGCAAATATAGTGAACCCGTC…
>STRG.3477.1
ATACTTACCTGGCAGGGGAGATACCATGATCACGAAGGTGGTTTTCCCAGGGCGAGGCTTATCCATTGCACTCCGGATGTGCTGACCCCTGCGATTTCCCCAAATGTGGGAAACTCGACTGCATAATTTGTGGTAGTGGGGGACTGCGTCCGCGCTTTCCCCTG
>STRG.3602.2
AGTTCGGATTACTTCTTTAAGTCTCTTTTCTCTTTTTTCGCGCAAAAATGCCGGATCCAGCGAAATCCGCTCCTGCTCCCAAGAAGGGCTCCAAAAAGGCTGTTACGAAAGTGCAGAAGAAGGACGGCAAGAAGCGCAAGCGCAGCCGCAAGGAGAGCTACTCCGTTTACGTGTACAAGGTGCTGAAGCAGGTCCACCCCGACACCGGCATCTCGTCCAAGGCCATGGGCATCATGAACTCCTTCGTCAACGACATCTTCGAGCGCATCGCGGGAGAGGCGTCCCGCCTGGCGCACTACAACAAGCGCTCCACCATCACATCCCGCGAGATCCAGACGGCCGTGCGCCTGCTGCTGCCCGGCGAGCTGGCCAAGCACGCCGTGTCCGAGGGCACCAAGG…
>STRG.3605.1
CAATGAGACAGCATGGCCCGTACTAAGCAGACTGCCCGCAAGTCGACCGGCGGCAAGGCCCCGAGGAAGCAGCTGGCTACCAAAGCGGCCCGCAAGAGCGCGCCGGCCACGGGCGGGGTGAAGAAGCCGCACCGCTACCGGCCCGGCACCGTGGCTCTGCGGGAGATCCGGCGCTACCAGAAGTCTACGGAGCTGCTGATCCGCAAGCTGCCCTTCCAGCGGCTGGTACGCGAGATCGCGCAGGACTTTAAGACGGACCTGCGCTTCCAGAGCTCGGCCGTGATGGCGCTGCAGGAGGCCAGCGAGGCCTACCTGGTGGGGCTGTTCGAAGACACGAACCTGTGCGCCATCCATGCCAAGCGCGTGACCATCATGCCCAAGGACATCCAGTTGGCCCGC…
>STRG.3607.1
AGAAGCTGTCTATCGGGCTCCAGCGGTCATGTCCGGCAGAGGAAAGGGCGGAAAAGGCTTAGGCAAAGGGGGCGCTAAGCGCCACCGCAAGGTCTTGAGAGACAACATTCAGGGCATCACCAAGCCTGCCATTCGGCGTCTAGCTCGGCGTGGCGGCGTTAAGCGGATCTCTGGCCTCATTTACGAGGAGACCCGCGGTGTGCTGAAGGTGTTCCTGGAGAATGTGATTCGGGACGCAGTCACCTACACCGAGCACGCCAAGCGCAAGACCGTCACAGCCATGGATGTGGTGTACGCGCTCAAGCGCCAGGGGCGCACCCTGTACGGCTTCGGAGGCTAGGCCGCCGCTCCAGCTTTGCACGTTTCGATCCCAAAGGCCCTTTTTAGGGCCGACCA
>STRG.3609.1
GACTTTCCCGATCGCCAGGCAGGAGTTTCTCTCGGTGACTACTATCGCTGTCATGTCTGGTCGTGGCAAGCAAGGAGGCAAGGCCCGCGCCAAGGCCAAGTCGCGCTCGTCCCGCGCTGGCCTTCAGTTCCCGGTAGGGCGAGTGCATCGCTTGCTGCGCAAAGGCAACTACGCGGAGCGAGTGGGGGCCGGCGCGCCCGTCTACATGGCTGCGGTCCTCGAGTATCTGACCGCCGAGATCCTGGAGCTGGCGGGCAACGCGGCTCGGGACAACAAGAAGACGCGCATCATCCCTCGTCACCTCCAGCTGGCCATCCGCAACGACGAGGAACTGAACAAGCTGCTGGGCAAAGTCACCATCGCCCAGGGCGGCGTCTTGCCTAACATCCAGGCCGTACT…
>STRG.3613.1
GTTTTTCTCCCCGCCGCTGCGCTGGTAAGCCTGTGTTTTGGTTCGCTATGGCCCGTACTAAGCAGACTGCTCGCAAGTCGACCGGCGGCAAGGCCCCGAGGAAGCAGCTGGCCACCAAGGCGGCCCGCAAGAGCGCGCCGGCCACGGGCGGGGTGAAGAAGCCGCACCGCTACCGGCCCGGCACCGTAGCCCTGCGGGAGATCCGGCGCTACCAGAAGTCCACGGAGCTGCTGATCCGCAAGCTGCCCTTCCAGCGGCTGGTACGCGAGATCGCGCAGGACTTTAAGACGGACCTGCGCTTCCAGAGCTCGGCCGTGATGGCGCTGCAGGAGGCCAGCGAGGCCTACCTGGTGGGGCTGTTCGAAGACACGAACCTGTGCGCCATCCACGCCAAGCGCG…
>STRG.3618.1
AATCTTATTTTGTTGCGAGGTTCTGAGCGTTGTCTGTGTTTAACCTTGATTTCAGTCATGTCTGGTCGTGGCAAACAAGGAGGCAAGGCCCGCGCCAAGGCCAAGTCGCGCTCGTCCCGCGCTGGCCTCCAGTTCCCGGTAGGGCGAGTGCACCGCTTGCTGCGCAAAGGCAACTACGCGGAGCGGGTGGGGGCCGGCGCGCCCGTCTACATGGCGGCGGTCCTCGAGTACCTGACCGCCGAGATCCTGGAGCTGGCGGGCAACGCGGCTCGGGACAACAAGAAGACGCGCATCATCCCTCGTCACCTCCAGCTGGCCATCCGCAACGACGAGGAACTGAACAAGCTGCTGGGCAAAGTCACCATCGCCCAGGGCGGCGTTTTGCCTAACATCCAGGCC…
>STRG.3619.1
CCACATTCTTCTCCTTGTAAAAGAAGCTGTAACTGCAATTTTAGCCGTAATGTCAGGACGCGGAAAGCAGGGAGGCAAGGCCCGCGCTAAGGCCAAGTCGCGCTCGTCCCGCGCTGGTCTCCAGTTCCCGGTGGGGCGAGTGCACCGCTTGCTGCGCAAAGGCAACTACGCGGAGCGGGTCGGGGCAGGCGCCCCGGTGTACCTGGCGGCGGTCCTCGAGTACCTGACCGCGGAAATTCTGGAGCTGGCGGGCAACGCGGCTCGGGACAACAAGAAGACGCGCATCATCCCTCGCCATCTGCAACTAGCCGTGAGGAATGACGAAGAGCTCAACAAGTTACTCGGGGGTGTCACCATTGCCCAGGGCGGCGTCTTGCCCAATATCCAGGCTGTCCTGTT…
>STRG.3645.2
AGCCCTTCAAGAAGAGGTATGATTGCTACCACTTTTCCCCACAAAGTGACGAAAGGAAACAGCGACGGAAGCGCAACCGAACCCTGGAATTGGTGTCTCGACTGGTCCATTCCCGGCCCACCCCCATTAACCGGCTCGAGCCACTCCCAGGACGAAGTCAAGGCCTCGGAAGGCGACTACAACTCCCAGCAGGTCGAGCAGCTCCGCCCGCGCTGATTCTCCATTGGCCTTCCGGGGGTGGGGATTAGATGGGAGGTGGCCGTGGGGCTGCGGCCGGGATTTGTCCCCTCTTCGGCTTCCGTAGAGGAAGTGGCGCGGACCTTCATTTGGGGTTTCGGTTCCCCCCCTTCCCCTTCCCCGGGGTCTGGGGGTGACATTGCACCGCGCCCCTCGTGGGGT…
>STRG.3681.1
GTGTTATTCCTTCTCTGCATCGAAGGATCAGGAAGTTTGTGCTCTCTGCGTGGCTAAGTTTTTCACCTACTAGGACGGGGGTGGGGTGGGGAGAACAGGTGTCCTTCTAAAATACAGCACAAGCTACAGCCTGCGTCCAGCCATAACCCAGGAGTAACATCAGAAACAGGTGAGAATGACCACTTTAACTCACCGGGCCCGTCGCACTGAAATAAGCAAGAACTCTGAAAAGAAGATGGAAAGTGAGGAAGACAGTAATTGGGAGAAAAGTCCAGACAATGAAGATTCTGGAGACTCTAAGGATATCCGCCTTACTCTTATGGAAGAAGTATTGCTTCTGGGACTAAAAGATAAAGAGGGGTACACATCTTTCTGGAATGACTGCATATCATCAGGCCT…
>STRG.4055.4
GAACAAGGGAAAGAGCCGGTGAAGGGGCAGAACAGGCAGGTTCCCTCGACCCAGGACCCCCTGTTCCCAGGCTATGGCCCCCAGTGCCCTGTAGACCTGGCAGGCCCCCCGTGCTTGCGACCCCTATTTGGGGGTCTGGGTGGCTACTGGAGGGCCTTGCAGAGGGGCAGAGAAGGCAGGACCATGACATCTAGGGCCTCTGAACTTTCTCCGGGGCGCAGCGTGACGGCTGGCATCATCATTGTTGGAGATGAGATCCTTAAGGGACACACTCAGGACACCAACACCTTCTTTCTGTGCCGGACACTGCGCTCCCTAGGGGTCCAGGTTTGCCGAGTCTCAGTTGTACCTGATGAGGTAGCCACCATTGCAGCTGAGGTCACTTCTTTCTCCAACCGC…
>STRG.4078.1
ACCCAAGCCCCAGCCCGGCCTCCGCTCCGGCCGCCGCCACCGCCCCTGTTTTGTTTCCATGGCGACAGGCGGCGCAGGGCCCGCTCCAAACATAACGCGCTGTGGAAAACATGCTGCTCGGGGGACCCCCCCGCAGTCCCCGCTCGGGGACGAGCCCCAAGGGGCCCTGGAGCAGTACAGGCCACGTGCAGTTTGGCAAGAGCCCCCAGACCTGGCCCAGGCGCACAAGACCCCGCTCTCCAGAGCCTGCCGCGCCTTCAGGGGTTCGGGGCTCCACTTGGACGAGGCGCCGTGACTCTCCGAGGCGCGCCGGGCCGACAGCGCTGTCCCGCTACGTGGGCCACCTCTGGATGGGCCGGCGGCCGCCCTCCCCCGAGGCCCGCGGCCCAGTCCCCCGCA…
>STRG.4084.3
GGAAGGAAGTCACATGGAAGAGGGGCGGTAGTTGGTTGTGGGCACTGGGTTAGAGGTATCACGTGGGGGCACTTTCGTCTTAGCTTTTGGACAAGACGCAGGCGCAACCCACGGCTGCTGCGGGGATCCTTGTGGCCCTTCCGGTCGGTGGAACCAATCCGTGCACAGAGAAGCGGGGCGAACTGAGGCGAGTGAAGTGGACTCTGAGGGCTACCGCTACCGCCACTGCTGCGGCAGGGGCGTGGAGGGCAGAGGGCCGCGGAGGCCGCAGTTGCAAACATGGCTCAGAGCAGAGACGGCGGAAACCCGTTCGCCGAGCCCAGCGAGCTTGACAACCCCTTTCAGCCACCACCAGCCTATGAGCCTCCAGCCCCTGCCCCATTGCCTCCACCCTCAGCT…
>STRG.4171.5
GGGCCGGGGGCGCGCGCTCTGCGAGCTGGATGTCCAGGCTGCGGGCGCTGCTGGGCCTCGGGCTGCTGGTTGCGGGCTCGCGCGTGCCGCGGATCAAAAGCCAGACCATCGCCTGTCGCTCGGGACCCACCTGGTGGGGACCGCAGCGGCTGAACTCGGGTGGCCGCTGGGACTCAGAGGTCATGGCGAGCACGGTGGTGAAGTACCTGAGCCAGGAGGAGGCCCAGGCCGTGGACCAGGAGCTATTTAACGAATACCAGTTCAGCGTGGACCAACTTATGGAACTGGCCGGGCTGAGCTGTGCTACAGCCATCGCCAAGGCATATCCCCCCACGTCCATGTCCAGGAGCCCCCCTACTGTCCTGGTCATCTGTGGCCCGGGGAATAATGGAGGAGATG…
>STRG.4189.2
GGTGCGCGCCGACGAAGCCCGGGAAGGCAGGCGCGCGGGTTAGAACGCGCCAGAGGTCGGCGCGCGCACACCCGCACCGCCCCGACCCCAGGTAGTGAGGCCAGTGATTCCGAGTGTGTGAGGAGCGGCAGTGGCGGCGGAGGAGGGGGCGGCGTGGGTGGGGGCGGGGGCGGGATGCGCTCCCCGGCCCCTCTAGCCCCGTGGTGGTACAACGCGAAGGTGTGGGAAGGCCGCGATAAACCGGAACTGCAGCCCGCCGGACACCTCCGGCTTCACTTCCGTAAGAGGAGAGGAGTGTACGGCAAGGGGCGGGAACTGGAACTTGGCCCGCCTCGTTGTGAGCTGAGCTCAGCGGCACGCTTTTGTGGCGTCACTGCACTGTTACCCCGCCCTACGTGT…
>STRG.3842.1
GGTAGCAAGATGGCCGCCGCTGAGGAAGGCTGTAGTGTCGGGGCCGAAGCGGACAGGGAATTGGAGGAGCTTCTGGAAAGTGCTCTTGATGATTTCGATAAAGCCAAACCCTCCCCAGCACCCCCTTCTACCACCACGGCCCCTGATGCTTCGGGGCCCCAGAAGAGATCGCCAGGAGACACTGCCAAAGATGCCCTCTTCGCTTCCCAAGAGAAGTTTTTCCAGGAACTATTCGACAGTGAACTGGCTTCCCAAGCCACTGCGGAGTTCGAGAAGGCAATGAAGGAGTTGGCTGAGGAAGAACCCCACCTGGTGGAGCAGTTCCAAAAGCTCTCAGAGGCTGCAGGGAGAGTGGGCAGTGATATGACCTCCCAACAAGAATTCACTTCTTGCCTAAAG…
>STRG.3872.2
GGACGGAGCGTAGGAGAGACCGAAAAGGCTGGGGGTGGGAGTAGCGGATTTGAAGCACTTGTTGGCCTACAGAGGTGTGGCAAGCAGAGCACCTCAGAACTCAGGCGTACTGCCCGCCGCCCGAGCCCTGCGAGGGCCGATAGCGAGGGTGTGGCCCTTATCTGCACCCAGCAGAGCGCCGGCGGGGTACGGTCTTAGGACCTCGATCTCCTTCTCCCTCATTTTCTCTCATCCCTACCTATTGTGGGTTTCCGCATGGGCCGGACCGTGGTCGTGCTGGGCGGAGGCATCAGCGGCTTGGCCGCCAGTTACCACCTGAGCCGGGCCCCCTGCCCCCCTAAGGTGGTCCTAGTGGAGAGCAGTGAGCGTCTGGGAGGCTGGATTCGCTCCGTTCGAGGC…
>STRG.3882.1
ACTTCCGTCCAGACCGGAACCCAAGATGGCTGCGCTGTTGCTGAGACACGTTGGTCGTCATTGCCTCCGAGCCCACTTTAGCCCTCAGCTCTGTATCAGAAATGCTGTTCCTTTGGGAACCACGGCCAAAGAAGAGATGGAGCGGTTCTGGAATAAGAATATAGGTTCAAACCGTCCTCTGTCTCCCCACATTACTATCTACAGTTGGTCTCTTCCCATGGCGATGTCCATCTGCCACCGTGGCACTGGTATTGCTTTGAGTGCAGGGGTCTCTCTTTTTGGCATGTCGGCCCTGTTACTCCCTGGGAACTTTGAGTCTTATTTGGAACTTGTGAAGTCCCTGTGTCTGGGGCCAGCACTGATCCACACAGCTAAGTTTGCACTTGTCTTCCCTCTCAT…
>STRG.4243.1
GGTCTGCGGTCGGGCTGAGACACGCGGAGCAATGGCGACCTTTGTGAGCGAGCTGGAGGCGGCCAAGAAGAACTTAAGCGAGGCCCTGGGGGACAACGTGAAACAATACTGGGCTAACCTAAAGCTGTGGTTCAAGCAGAAGATCAGCAAAGAGGAGTTTGACCTTGAAGCTCATAGACTTCTCACACAGGATAATGTCCATTCTCACAATGATTTCCTCCTGGCCATTCTCACGCGTTGTCAGATTTTGGTTTCTACACCAGATGGTGCTGGATCTTTGCCTTGGCCAGGGGGTTCCGCAGCAAAACCTGGAAAACCCAAGGGAAAGAAAAAGCTTTCTTCTGTTCGTCAGAAATTTGATCATAGATTCCAGCCTCAAAATCCTCTCTCAGGAGCCCA…
>STRG.4312.2
AGAGGCGTCTGTAGGGTAAAGCTGGGGGTTCTGTAGCCGGAGGCGGCGGCGAGTCCAGAACGTCCTGGCCTTACAGGGAGAAGGCGTCACTCGCGGTTACAAGTGCCTGACCCTCACTCCAGTTGGCGGAGGAGGAGAAGGAAGGGGCCGGGCCGGGTCCCCTCCCCTCGCGCCCCGGATGGATGTGCCCGGCCCGGTGTCTCGGCGGGCGGCGGCGGCGGCGGCCACTGTGCTCCTGCGGACCGCTCGGGTCCGTCGCGAATGCTGGTTCTTGCCGACCGCGCTGCTCTGCGCCTACGGCTTCTTCGCCAGCCTCAGGCCGTCCGAGCCCTTCCTGACCCCGTACCTGCTGGGGCCGGACAAGAACCTGACCGAGAGGGAGGTCTTCAATGAAATTTA…
>STRG.4433.1
GCTTCTTCGCCAGAACCAACCGGTTGCTTGCTGTCCCAGCGGCGCCCCCTCATCACCGTCGCCATGCCCGGAGGTCTGCTTCTCGGGGACGTGGCTCCCAACTTTGAGGCCAATACCACCGTCGGCCGCATCCGTTTCCACGACTTTCTGGGAGACTCATGGGGCATTCTCTTCTCCCACCCTCGGGACTTTACCCCAGTGTGCACCACAGAGCTTGGCAGAGCTGCAAAGCTGGCACCAGAATTTGCCAAGAGGAATGTTAAGTTGATTGCCCTTTCAATAGACAGTGTTGAGGACCATCTTGCCTGGAGCAAGGATATCAATGCTTACAATTGTGAAGAGCCCACAGAAAAGTTACCTTTTCCCATCATCGATGATAGGAATCGGGAGCTTGCCATC…
>STRG.4443.3
GAAGGGCGCTTGGACCCCAGCGGCGATCTGTGTTTGGGTTCGCGCTCTGGGAGAATTTTGGCTTTGCTCGCCTTCCTCTTTCAGAAGACTCGAAATCGGCCAGCAGGTCTGCGAGATTTGAAACGCGACTGTTACTCCTTGTTTTCCGGTTCTGGCCGCGGGAGCCTCTCGAGAAGCGTGGAAAGAGGAGAAGGGCGTATACCTTGTGACCGCCTCTGGTTGTCTTGGGCTCGCGCCTGGCGCCGCTACGTGGAGTCGCTCTCTCGTCGTCACTTTTGGCTGCCGACTTGTTGAGTAGAAGTGCAGACTGATGCTTTAAGACTCAGGGAGAGGTCTTTCCCTTATCTCCACCCCAGCAAGCACCCCAGAGACCTTGGAGATTTGTCTTGTTTCTAGACA…
>STRG.4528.2
ACTGCCTCTCTCACAGCCCTCAAGACACACCATGGGCCCAGAGGCAGGTTTGCTACACAGCAGCGACGACGCAGGCGGCGGCCCCAGCGACTCGCAACTGCCTCCCTGACCACAGCGGCCACCGCCCAACACCCCCGAGAAGCCATCGCCACCACCGGCAGGAGAACCTAGGGTCCATAAAGCCATCTTCGCGATCGACTAAAGCTACGTCAACAACTATGGCGGGCGACGGGCGGCGGGCAGAGGCGGTGCGGGAAGGATGGGGTGTGTACGTCACCCCCAGGGCCCCCATCCGAGAGGGAAGGGGCCGGCTCGCCCCTCAAAATGGCGGCAGCAGCGATGCGCCTGCGTACAGAACTCCTCCGTCGCGCCAGGGCCGGCGGGAAGTGAGGTTCTCGG…
>STRG.4565.1
AGAGTCGAGAGTGGGAGAAGAGCGGAGCGTGTGAGCAGTACTGCGGCCTCCTCTCCTCTCCTAACCTCGCTCTCGCGGCCTAGCTTTACCCGCCCGCCTGCTCGGCGACCAGAACACCTTCCACCATGACCACCTCAGCAAGTTCCCACTTAAATAAAGGCATCAAGCAGGTGTACATGTCCCTGCCTCAGGGTGAGAAAGTCCAGGCCATGTATATCTGGATCGATGGTACTGGAGAAGGACTGCGCTGCAAGACCCGGACCCTGGACAGTGAGCCCAAGTGTGTGGAAGAGTTGCCTGAGTGGAATTTCGATGGCTCTAGTACTTTACAGTCTGAGGGTTCCAACAGTGACATGTATCTCGTGCCTGCTGCCATGTTTCGGGACCCCTTCCGTAAGG…
>STRG.4556.1
AGTCGGCGACGCCTCAGAGCGGAAGAGGGAAGTGAATCAGGCGCCGGGTAGTGGGTTGCTGGGCTGGGCTTGCTGAGGTAGAGGCAGCGCCAAGAAGAGGCCTTTGCCGCTGGTCGGGATTGGGATGTCGAAGAACACAGTGTCGTCGGCCCGCTTCCGGAAGGTGGACGTGGATGAATATGACGAGAACAAGTTCGTGGACGAAGAAGATGGGGGCGACGGCCAGGCCGGGCCCGACGAGGGCGAGGTGGACTCCTGCCTGCGGCAAGGAAACATGACAGCTGCCCTACAGGCAGCTCTGAAGAACCCCCCTATCAACACCAAGAGTCAGGCAGTGAAGGACCGGGCAGGCAGCATTGTCTTGAAGGTGCTCATCTCTTTTAAAGCTAATGATATAGA…
>STRG.4604.2
ATATTGTGCGGCGGCGCCGGCGTCCGCGGCAGCTGATACCAGAGTCTTGCTCCGGCCGCGGCCAGCGGAGCCCTGGGCTGGGGCAGGAGCCGCAATGTCTCAGGCTGTGCAGACAAACGGAACTCAACCATTAAGCAAAACATGGGAACTCAGTTTATATGAGTTACAACGAACACCTCAGGAGGCAATAACAGATGGCTTAGAAATTGTGGTTTCACCTCGAAGTCTACACAGTGAATTAATGTGCCCAATTTGTTTGGATATGTTGAAGAACACCATGACTACAAAGGAGTGTTTACATCGTTTTTGTGCAGACTGCATCATCACAGCCCTTAGAAGTGGCAACAAAGAATGTCCTACCTGTCGGAAAAAACTAGTTTCCAAAAGATCACTAAGGCC…
>STRG.4688.1
ACACTCCTGACAGCGGCGGCAGCAGGAGGAGGATCGGGAGTCGCGGGAGGATGGGCCGCCGCTAGGCTCGCACTCCGGACGCGCCTCGCAGTGCGCAGGGTGGGTGCCCCGCGCCTGCAGCGTCCGCCGGGGCGGCGCGGCGGGAGGTGGCCGACAGGCTCCGGGCCTCGCAGCCTCAGCCCCCGGCCCAGCGCGCTTTCCGACGGCGGCGCCGCGCCGAGCCACCCGCCCGCCCAAGGTCTCTCGCGGGCGGGAGAACGGAAAACTCCCAACTTCCTGAGTTCTAAAGTTCCTGTTGCTTCAGACAATGGATGAGCAATCACAAGGAATGCAAGGGCCACCTGTTCCTCAGTTCCAACCACAGAAGGCCTTACGACCGGATATGGGCTATAATACATT…
>STRG.4828.1
CTCGCGAGAGTTAGCGGCCTCCGGTGTGGGATGGCCGCGGAGCCGGGCGGAGCTGGCTTGCGGCTCCCGGGGCCGGCTCTCCGGCCGGAGACATGGCCCGGGGGCCCGGCCCGCTAGGCAGGCCTCGCCCCGATACGGTCGCCATGCCCAAGAGAGGAAAGCGACTCAAGTTCCGGGCCCACGACGCCTGCTCCGGCCGAGTGACCGTGGCGGATTACGCCAACTCGGATCCGGCGGTCGTGAGGTCTGGACGAGTCAAGAAAGCCGTAGCCAACGCTGTTCAGCAGGAAGTAAAATCTCTTTGTGGCTTGGAAGCCTCTCAGGTTCCTGCAGAGGAAGCTCTTTCTGGGGCTGGTGAGCCCTGTGACATCATCGACAGCAGTGATGAGATGGATGCCC…
>STRG.4864.1
AGGTTGGGAGAGCGGCGGAGAAGCGAGTGAGGAGGGCGAGCGCGAAGCCGGGAAGAGGGGCGCGCGTGGAGGGGGTGCCGGGCGCCGCGAGGGCCTGCTCCGGGCACCTGCGAACGCGCGGCGCTCTCAAGGAGCGCCTGGCTCTCGCCCGCCAGCCTCCGGCCGCGACGCGCCCAGGGCGCGGAGAGGGGGTGGGGACGGATTGGGATTCTGCCATCGCCCTCACCGGCTGGGCCCTGGAGCCGCTCCCAGGATAACTCCACGTTGGGGAGGGCGCCCGCCGAGCCTCCCCGGCCTGTGCAGACGGCGCGCGCGGCGGGAGGGCGCGGACCAGCGTCCCCAGCCCGGCCCCGGGCGGAAGGCGAGCGGAGCGCGGCCGCGCGGGCAGCAGACGGCAGA…
>STRG.4878.7
CTGCTTACTGCAACTCGCTCCGGCCGCTGGGCGTAGCTGCGACTCGGCGGAGTCCCGGCGGCGCGTCCTTGTTCTAACCCGGCGCGCCATGACCGTCGCGCGGCCGAGCGTGCCCGCGGCGCTGCCCCTCCTCGGGGAGCTGCCCCGGCTGCTGCTGCTGGTGCTGTTGTGCCTGCCGGCCGTGTGGGGTGACTGTGGCCTTCCCCCAGATGTACCTAATGCCCAGCCAGCTTTGGAAGGCCGTACAAGTTTTCCCGAGGATACTGTAATAACGTACAAATGTGAAGAAAGCTTTGTGAAAATTCCTGGCGAGAAGGACTCAGTGATCTGCCTTAAGGGCAGTCAATGGTCAGATATTGAAGAGTTCTGCAATCGTAGCTGCGAGGTGCCAACAAGGCT…
>STRG.5055.1
GTAACAGGGCTTGACAGCGCGCGGAAGAAAAACCAGCAAGAAGGCGGCGGGGGAAGATGGCGGTCCTGGGGTAGAGTTTGCAAGCTTTCTGACTAGGCTAGTCGAGTAACTATTCGGGTCATGGCGTCAAACTCAACTAAGTCTTTCCTGGCAGATGCCGGCTATGGCGAACAGGAACTGGATGCCAACTCTGCCCTTATGGAATTGGACAAAGGCCTAAGATCTGGCAAACTTGGTGAACAGTGTGAAGCAGTTGTTCGCTTTCCCAGACTTTTTCAGAAGTATCCATTCCCTATTCTTATCAATTCTGCATTCCTAAAGTTAGCTGATGTTTTCAGAGTTGGAAATAATTTCCTGAGGCTATGTGTTCTTAAAGTTACCCAACAAAGTGAGAAACAT…
>STRG.5074.1
AGTCGCCTGTACCAACCACCTTCTCAAGTTGTAGCGGTCGCTCGCCTGGGGTTCTCCGTGGGCGGCCGACGGGCGCGTGGGGGAGGGGGTTCGGGCCGCCCAGCGCGGCAAGGAGCGAGTGTGTGCACGCAGAGGGCCGGGGCTACGGGGCAGCGCCCCGGGCGATGAGGGGCCGGCGTTGACCGGGAAGAGCGGGCACCGCGGCAGTGGCTCCGAGGGGACCCGCGATGGCAGCGCCCTGAGAGGAGGCTCCAGGCAGGGCGGGCTGCGCTGGCAGCGGCCGCTGAGGTGCTGGCCGGCCGGCTGGCTGGCGACGGGGGCAGAAGCGACGAGAGGCGCGCTCGGCACCCGCACCCCCGTGCCCCCGCCTCAGTTGTCTAAACTTCGGGCTCTCTTCCA…
>STRG.5118.9
AGTGGCATCAGCGATGGCGGCTGCGTCGGGGTCGGTTCTGCAGCGCTGTATCGTGTCGCCGGCAGGGAGGCATAGCGCCTCTCTGATCTTCCTGCATGGCTCAGGTGATTCTGGACAAGGATTAAGAATGTGGATCAAGCAGGTTTTAAATCAAGATTTAACATTCCAACACATAAAAATTATTTATCCAACAGCTCCTCCCAGATCATATACTCCTATGAAAGGAGGAATCTCCAATGTATGGTTTGACAGATTTAAAATAACCAATGACTGCCCAGAACACCTTGAATCAATTGATGTCATGTGTCAAGTGCTTACTGATTTGATTGATGAAGAAGTAAAAAGTGGCATCAAGAAGAACAGGATATTAATAGGAGGATTCTCTATGGGAGGATGCAT…
>STRG.5145.1
ATTGACAGTGCCAAAGCTCGGTACTGGACACAACGAGGGACCTGGGTCTACGATAACGCGCTTTTGCTCCTCCTGAAGTGTCTTTGGTCCAACGTTGTTCCAGAGTGTACCATGGCTTCCAGTAACACTGTGTTGATGCGGTTGGTAGCCTCCGCATATTCTATTGCTCAAAAGGCAGGAATGATAGTCAGACGTGTTATTGCTGAAGGAGACCTGGGTATTGTGGAGAAGACCTGTGCAACAGACCTGCAGACCAAAGCTGACCGATTGGCACAGATGAGCATATGTTCTTCATTGGCCCGGAAATTCCCCAAACTCACAATTATAGGGGAAGAGGATCTGCCTTCTGAGGAAGTGGATCAAGAGCTGATTGAAGACAGTCAGTGGGAAGAAATACTG…
>STRG.5376.1
AGCGTCGCGCGCGTGGATCTGCCGCCGGGTTGCTGTGCGACTATTCTCCGGGAGCCGTCCGTGTCACCGCCGGAACCTGGCGCAGGTTAATTATAGAAAATGCCAAGTAGGAAATTTGCCGATGGTGAAGTGGTAAGAGGTCGATGGCCTGGGAGTTCACTTTATTATGAAGTAGAAATTCTGAGCCACGACAGCACCTCCCAGCTTTACACTGTGAAGTATAAAGATGGAACAGAGCTTGAATTGAAAGAGAATGATATTAAGCCTTTAACTTCCTTTAGGCAAAGGAAAGGTGGCTCAACTTCCAGTTCCCCTTCCAGACGCCGAGGGAGTCGATCAAGGTCACGCTCCCGATCCCCTGGTCGACCACCTAAAAGTGCCCGCCGATCTGCTTCTGCT…
>STRG.5453.1
AGAGCCGCCATCTTGTGGGAGCAAAACCAACGCCTGGCTCGGAGCAGCAGCCTCTGAGGTGTCCCTGGCCAGTGTCCTTCCACCTGTCCACAAGCATGGGGAACATCTTCGCCAACCTCTTCAAGGGCCTTTTTGGCAAAAAAGAAATGCGCATCCTCATGGTGGGCCTGGATGCTGCAGGGAAGACCACGATCCTCTACAAGCTTAAGCTGGGTGAGATCGTGACCACCATTCCCACCATAGGCTTCAACGTGGAAACCGTGGAGTACAAGAACATCAGCTTCACTGTGTGGGACGTGGGTGGCCAGGACAAGATCCGGCCCCTGTGGCGCCACTACTTCCAGAACACACAAGGCCTGATCTTCGTGGTGGACAGCAATGACAGAGAGCGTGTGAACG…
>STRG.5488.2
CTCTTGTTTTTAGTCTCGCTTTTCGGTTGCCGTTGTCTTTTTTCCTTGACTCGGAAATGTCCGGTCGTGGTAAGCAGGGTGGCAAGGCGCGCGCCAAGGCTAAGTCGCGCTCGTCGCGCGCGGGGCTGCAGTTCCCCGTGGGCCGCGTGCACCGGTTGCTCCGCAAGGGCAACTATTCGGAGCGCGTGGGCGCCGGCGCCCCGGTCTATCTGGCCGCGGTGCTCGAGTACTTGACTGCCGAGATCCTGGAGCTTGCCGGCAACGCGGCGCGCGACAACAAGAAGACGCGCATCATCCCGCGCCACCTGCAGCTGGCCATCCGCAACGACGAGGAGCTCAACAAGCTGCTGGGCCGCGTGACCATCGCGCAGGGTGGCGTCCTGCCCAACATCCAGGCCG…
>STRG.5489.1
GTTTCTGTTTGGAGAGACTCAGCCATCATGCCAGACCCGTCCAAATCGGCTCCTGCGCCCAAGAAGGGTTCTAAAAAGGCTGTCACCAAGGCACAGAAGAAGGACGGCAAGAAGCGCAAGCGCGGCCGCAAGGAGAGCTATTCTATCTACGTGTACAAGGTGCTGAAGCAGGTGCACCCCGACACCGGCATCTCGTCCAAGGCCATGGGCATCATGAACTCCTTCGTCAATGACATCTTCGAGCGCATCGCCAGCGAGGCCTCCCGCCTGGCACACTACAACAAGCGCTCCACCATCACGTCCCGCGAAGTGCAGACGGCCGTTCGCCTGCTGCTGCCCGGCGAGCTGGCCAAGCACGCCGTGTCCGAGGGCACCAAGGCTGTCACCAAGTACACCAGC…
>STRG.5222.1
AGAGCGCTTGGGATCCACGGCGCTCGGACCGCTGTCCTCCAACAGCGCAGGGCAGAGCGGCTGGCGCCGCCGGAGCGCGGAGCCACGACCCTCCCTGGCCGCCTTTGTCTACTGGCCGTGCGGCCCGGAACCGCCACTCTCCAGGGCCGGGGACGCGCCCGCAGCTGTCGGTGACAGCTCCTCCCTACCGCAACCCTCCGGGGCGGAGGGGCGGTCGGGCCGGGCCCTGCTAGCCCGCGACCGCAAGCCCGCGCTCGCGGATCGATGCCCCCGCAGCAGGGGGACCCCGCGTTCCCCGACCGCTGCGAGGCGCCTCCGGTGCCGCCGCGTCGGGAGCGCGGTGGACGCGGGGGACGCGGGCCTGGGGAGCCGGGGGGCCGGGGGCGTGCGGGGGGTGCC…
>STRG.5243.1
GGGCTTTGCGCGCGCCTGGCCGGCGGGCTGAGGCGTACGGGTCGCACGCAGCGCCATGCGAGGCCCCCCTGCCTGGCCGCTGCGGCTGCTCGAGCCACCGAGCCCTGCCGAGCCAGGTCGGCTCCTGCCGGTAGCCTGCGTGTGGGCCGCGGCCAGCCGCGTTCCCGGGTCCCTATCGCCGTTCACTGGCCTGAGGCCGGCGCGGCTATGGGGCGCGGGGCCCGCGCTGCTCTGGGGCGTTGGAGCCGCGCGCCGCTGGAGGAGCGGCTGCCGGGGCGGGGGTCCGGGCGCCTCGCGGGGCGTCCTGGGCCTCGCGCGGCTCCTGGGGCTGTGGGCTCGCGGCCCCGGCAGCTGCAGGTGCGGGGCTTTTGCCGGGCCAGGCGCTCCTCGGCTCCCGCG…
>STRG.5249.1
ATTGGCGGAGACGGTTGCGCGTTGGAGGCCCGAGCGGCCCAGCCCGCGGCCCGCTCCGTGTCAGTCAGTCATGGAGCGGCCGCCCAGAGCGGCGGCGGGGGCGGCGGGGCGCGGGGCGCGGGGGCCCAGCTGAGCCGGCCGTCGGAGTGAGACCCTGCGGCAGAGACGACGGAGGCGGAAGCAACCCGATCCCGGAGGCGGCGGCGGCGGGGGGAGCCGGAGCCGCCTGGGATGTTCAGTCATGAAACGAGTGCGTACCGAGCAGATTCAGATGGCAGTGTCCTGCTACCTCAAACGCCGGCAGTACGTGGACTCAGATGGTCCCCTGAAGCAAGGACTGCGGCTGTCACAGACTGCTGAAGAGATGGCGGCCAATCTAACAGTGCAATCAGAATCTGG…
>STRG.5259.1
ATGTTGGCGGAAGCGGACCCCCCTGTGCCGTGGAAACTGGCGGTGGCCGCGGCCGCCGAGTCGGTCTGCGCAGCCTCCTGCGTTTTCTCGCTTGGATCTTGGCACTGAGAGGCGGTGGCCGGCGGGATGGAGAAAAGTAGGATGAACCTGCCCAAGGGGCCGGACACGCTCTGCTTCGACAAGGACGAGTTCATGAAGGAAGATTTCGATGTCGATCATTTTGTGTCTGACTGTAGGAAGCGGGTCCAGCTGGAAGAACTGAGAGATGACCTGGAGCTCTACTATAAACTTCTTAAAACAGCCATGGTCGAACTCATCAACAAGGATTATGCAGATTTTGTCAATCTTTCAACAAACTTGGTTGGCATGGACAAAGCCCTCAACCAGCTTTCTGTGCCT…
>STRG.5821.2
AGACGCTCCTGTCGGCGGCGCCCGGGAGCGGCTCGGCTGCCCGATGCTTCCGCCCCGGCTGCCGCGGGCCGGGCTGTACGCTTAGTGCCCGGCTCAGGCCCCCTGAAGCGCCCGCGGGGGTGAGAGCGGCCTCCGGCCCCGCGGAGACGGAGCGGCTTGAGGACGAGGCGGCGGCCGCGGGGAGGAGGATGGGGGCTAACCAGTTAGTGGTGCTCAACGTGTACGACATGTATTGGATGAACGAATATACCTCATCCATTGGAATTGGAGTTTTTCATTCAGGAATTGAAGTCTATGGCAGAGAATTTGCTTATGGTGGCCATCCTTACCCCTTTTCTGGAATATTTGAAATTTCCCCAGGAAATGCTTCTGAACTAGGAGAAACATTTAAATTTAAAG…
>STRG.5865.1
GCGGTCGCGGGCCGCCAGCCTCCAGCCGGCCAGCCGCGAGGGGTGCGCAGAGGGAGGCGGGGCGGAAAGGCGAGAGGTGTCTCCTCCACCGGAGCCAGGGGAGACCCGAGCAAGCTCCGTGACAGCACGTCGGCCGCCATGTCGCCGAGTGGGGCTGGAAACAGACCCGGCGCCCAGCGGTAGCCCTCCTTGCGCCTCCGATTCCCAGACATGGAAGGTCTTTAATGTAACTTTAAATGGTTCACCAAAGGATGCTCTAATGGATGACAGCGATACTCCTACATATTATCTGCAAATAGAACCACAAGATGGATGTCATCCTGGTGACAGCGTGGAAAGGAGTGTGACCTGTCTGCCTTCTGCATCAGATGAAAATGAAAATCAGCTTGACGGGGACGG…
>STRG.5884.2
CTCGTGCCCGCACGTGCGTGTCTCGGTCAGTAGCCCTGCGCTTCTCCTTCACTCTCGGCGGTTCAGGAGGCTCTGCCGCAGCCGGGGCCCTCCTGTGACCTGCATGTACTGGGGGATTCGCAGGGAGGATGTCGGGACACCCCGGAAGCTGGGAAATGAACTCGGTTGCCTTTGAGGATGTGGCTGTGAACTTCACCCAGGAGGAGTGGGCTTTGTTGGATCCTTCCCAGAAGAATCTCTATAGAGACGTGATGCAGGAAACCTTCAGGAATCTGGCTTCCATAGGAAACAAAGGGGAAGACCAGAGCATTGAAGATCAGTACAAAAATTCTTCAAGAAATCTAAGATGAGGTTTATATAACTTTCCAAGACAAGGAAGTTGTGCAAAGCCTCACAGCT…
>STRG.5884.4
GCCCGGCCTTTGTCTCTCGTGCCCGCACGTGCGTGTCTCGGTCAGTAGCCCTGCGCTTCTCCTTCACTCTCGGCGGTTCAGGAGGCTCTGCCGCAGCCGGGGCCCTCCTGTGACCTGCATGTACTGGGGGATTCGCAGGGAGGATGTCGGGACACCCCGGAAGCTGGGAAATGAACTCGGTTGCCTTTGAGGATGTGGCTGTGAACTTCACCCAGGAGGAGTGGGCTTTGTTGGATCCTTCCCAGAAGAATCTCTATAGAGACGTGATGCAGGAAACCTTCAGGAATCTGGCTTCCATAGGAAACAAAGGGGAAGACCAGAGCATTGAAGATCAGTACAAAAATTCTTCAAGAAATCTAAGGCACATCATATCTCATTCTGGAAACAACCCATATGGGT…
>STRG.32024.1
AGTTCTTCTCTTCCCGTCTGAGGTGGCGGTCGGTCTCGCCTTGTCGCCAGCTCCATTTTCCTCTCTTTCTCTTCCCCTTTCCTTCGCGCCCAAGAGCGCCTCCCAGCCTCGTAGGGTGGTCACGGAGCCCCTGCGCCTTTTCCTTGCTCGGGTCCTGCGTCCGCGCCTGCCCCGCCATGAATGAGGAGTACGACGTGATCGTGCTGGGCACCGGCCTGACGGAATGTATCCTGTCAGGTATAATGTCAGTGAATGGCAAGAAAGTTCTTCATATGGATCGAAACCCTTACTACGGAGGAGAGAGTGCATCTATAACACCATTGGAAGATTTATACAAAAGATTTAAAATACCAGGATCACCACCCGAGTCAATGGGGAGAGGAAGAGACTGGAATGTTG…
>STRG.32073.1
CTGACCGACCTTCAGCAGGGCTGTGGCTACCATGTTCTCTCGCGCGGGTGTCGCTGGGCTGTCGGCCTGGACCTTGCAGCCGCAATGGATTCAAGTTCGAAATATGGCAACTTTGAAAGATATCACCAGGAGACTAAAGTCCATCAAAAACATCCAGAAAATTACCAAGTCTATGAAAATGGTAGCGGCAGCAAAATATGCCCGAGCTGAGAGAGAGCTGAAACCAGCTCGAATATATGGATTGGGATCTTTAGCTCTGTATGAAAAAGCTGATATCAAGGGGCCTGAAGACAAGAAGAAACACCTCCTTATTGGTGTGTCCTCAGATCGAGGACTGTGTGGTGCTATTCATTCCTCCATTGCTAAACAGATGAAAAGCGAGGTTGCTACACTAACAGC…
>STRG.32148.3
GCGGGGCCGCGGGGAGCGAGAGCCGCCCTGCGCCGGACTGGCTTGCGGGCCGGGCCGCCGCCCCCGGAGCCGCCCTCGCGCCGCCTCGGGCCGCCGCCGAGCAGTCGGGCCGCTGGGCGCCGCCGCGGGCGCCGGGAGCGAGCTGGGAGGGAGCCGCGCGCCTTTGTGCGCGCGCCGAGGAGAATGCAGTTGAAACTAATTTTGTGGATAGAGAAACTGTTGGAACTGCTTTACAAAGTATTTTAACAGCCCACCTGAGGATATTGACCATAAGGACTCATATCTCATTACAAGAAGCATCATGGCCGAGCCAGACTACATAGAAGATGACAATCCTGAACTCATTAGGCCTCAGAAACTGATCAATCCTGTAAAAACCTCCCGGAACCATCAAGATCT…
>STRG.32159.1
AGAGCACCGGACGACAACAGCAGCAGCAACAACGCGGCAGCCGCCACCATGGCCCTGCAGGCTGATTTTGACAGGGCTGCAGAAGATGTGAGGAAGCTGAAAGCAAGACCAGATGATGGAGAACTGAAAGAACTCTATGGGCTTTACAAACAAGCAATAGTTGGAGACATTAATATTGCGTGTCCAGGAATGCTAGATTTAAAAGGCAAAGCCAAATGGGAAGCATGGAACCTCAAAAAAGGGTTGTCGACGGAAGATGCGACGAGTGCCTATATTTCTAAAGCAAAGGAGCTGATAGAAAAATACGGAATTTAGAATACAGCATATGAGGAATTTTTCCTTTTGAAGACTTCCAAATGCTATCATGACCTAACATTTAGAGGGAGAGGCATACTGTTA…
>STRG.32276.1
GTGCGTGTCGAAGGTCACGGCGCGCTCACAATGGAGCTCTCGGAGTCTGTGCAGAAAGGCTTCCAGATGCTGGCGGATCCCCGCTCCTTCGACTCCAACGCCTTCACGCTTCTCCTCCGGGCGGCATTCCAGAGTCTGCTGGACGCCCAGGCGGACGAGGCCGTGTTAGATCATCCAGACTTGAAACATATCGACCCAGTGGTTTTAAAACATTGTCATGCAGCAGCTGCAACTTACATACTAGAGGCAGGAAAGCACCGAGCTGACAAGTCAACTCTAAGCACTTATCTAGAAGACTGTAAATTTGACAGAGAGCGAATAGAACTGTTTTGCACGGAATATCAGAATAATAAGAATTCCCTAGAAATCCTACTGGGAAGTATAGGCAGATCTCTCCCT…
>STRG.32276.3
AGTTTCCACTCTGCCTTCAGCGGTGCATTTTTTTCCACCCTCCCCTCCCCCTCCTCCCCTCCCCCCGCTCGCACGCACACACACGGCGCCCCCCGCCCGCCCGCCTCCCCCACAGCAACTATGAAATAATCGTAGTATGAGAGGCAGAGATCGGGGCGAGACAATGGGGATGTGGGCGCGGGAGCCCCGTTCCGGCTTAGCAGCACCTCCCAGCCCCGCAGAATAAAACCGATCGCGCCCCCTCCGCGCGCGCCCTCCCCCGAGTGCGGAGCGGGAGGAGGCGGCGGCGGCCGAGGAGGAGGAGGAGGAGGCCCCGGAGGAGGAGGCGTTGGAGGTCGAGGCGGAGGCGGAGGAGGAGGAGGCCGAGGCGCCGGAGGAGGCCGAGGCGCCGGAGCAGGA…
>STRG.32391.2
GGTGAGCGCGCTGGAGCCCGCGTGGAGAACATGCGGCGGGGATGGGAGTGCGCCTAGTCTCGAGGCGGGAGAGCCAGCCGCCCTGCAGCCGGCCGTCGGCCCCGCAGCCACAGAAGCCGAGCCCCGCTGCGGAGCTCCCGGCGGCCCAGCCCCGAGGCTCTGCGGCCGCGCCGCGCGTCCCTACCAACCGACACCATGAACACCATCGTCTTCAACAAGCTCAGCGGTGCGGTGCTGTTTGAGGACGGAGGCGCCTCGGAGCGGGAGCGGGGTGGCCGGCCCTACAGCGGTGTCCTGGACAGTCCTCACGCCCGCCCCGAGGTGGGCATTCCCGACGGCCCGCCCCTCAAGGACAACCTCGGCCTGAGACACCGGAGGACCGGCGCCCGGCAGAATGGC…
>STRG.32406.1
GGGCTGGCGCGGGCGGGAGCTGCGGCGGATACCCTTGCGTGCTGTGGAGACCCTACTCTCTTCGCTGAGAACGGCCGCTAGCGGGGACTGAAGGCCGGGAGCCCACTCCCGACCCGGGGCTAGCGTGCGTCCCTAGAGTCGAGCGGGGCAAGGGAGCCAGTGGCCGCCGACGGGGGACCGGGAAACTTTTCTGGGCTCCTGGGCGCGCCCTGTAGCCGCGCTCCATGCTCCGGCAGCGGCCCGAAACCCAGCCCCGCCGCTGACGGCGCCCGCCGCTCCGGGCAGGGCCCATGCCCTGCGCGCTCCGGGGGTCGTAGGCTGCCGCCGAGCCGGGGCTCCGGAAGCCGGCGGGGGCGCCGCGGCCGTGCGGGGCGTCAATGGATCGCCACTCCAGCTACA…
>STRG.32510.6
GGCGGCCGGCCGGGGAGGCGGCCTCGGCGCACAGTAATGGCAGCGCTGTGAGCAGGGGAACGCGAGCTGACAGCCGCCGCCGCCGCCGCCTCCGCCCACCTTCCTCGCCGGGGCTTCGTCTTTCACTCCTTCGGGCTGCCTCCCCCTCCCCTTGTCCCCTGCCCCTTGCCCTGCTTCTGCAGAAGGTAACCCCGCTGAGGGTCGGGGAGCCGGGCTGCAGGCGCCGGGAAACTTCCCTTCCCGGTTAATGGGTGGCGGGGCTGGGGCGGAGGAGAGGAGTTGGGGGCGACGAGGTGTGGGGAGAGGGATGAAAGGGGGAGGCCCGGGAAGATGGTATCCTGTAAGTGACCTCGGCTCCCCAGAGCGCTGACCCGTAAGCCCTGCCACCCCCTGGACTGG…
>STRG.32666.2
GCAGCTCCGGTGCAAGCGAGGACACGACACATGCAGTGGCTTCTGGACTGCGCGATGACTGGACGCAAGTAACTTCTAGGTCTGCAGACAAGAGGAAGAGAAGATGAAGGAAGACTGTCTGCCGAGTTCTCACGTGCCCATCAGTGACAGCAAGTCCATTCAGAAGTCGGAGCTCTTAGGCCTGCTGAAAACCTACAACTGCTACCATGAGGGCAAGAGCTTCCAGCTGAGACACCGTGAGGAAGAAGGGACTCTGATCATCGAGGGGCTCCTCAACATTGCCTGGGGGCTGAGGCGGCCCATCCGGCTGCAGATGCAGGATGACCGGGAGCAGGTGCACCTCCCCTCCACCTCATGGATGCCCAGACGGCCTAGCTGCCCTCTAAAGGAGCCATCGCC…
>STRG.32699.1
GTCGCGAGAACTCTGCCTTTGGGCCGTAGGTTAGTGTGGGGCCGTGTCTCAGTCCACCCAAGGTCTCCTCGGATCGCCTGGAGAGGCACTCGGACCTGGAGCAGTGAGGAGAATGAATACCTTCCAAGACCAGAGTGGCAGCTCCAGTAATAGAGAACCCCTTTTGAGGTGTAGTGATGCACGGAGGGACTTGGAGCTTGCTATTGGTGGAGTTCTCCGGGCTGAACAGCAAATTAAAGATAACTTGCGAGAGGTCAAAGCTCAGATTCACAGTTGCATAAGCCGTCACCTGGAATGTCTTAGAAGCCGTGAGGTATGGCTGTATGAACAGGTGGACCTTATTTATCAGCTTAAAGAGGAGACACTTCAACAGCAGGCTCAGCAGCTCTACTCGTTATT…
>STRG.32782.6
GCAATCAAAATGGGACTTCCTTGAGGGCAGGCCTGTCTTGCATCTGTTTCTCCACCACCTAGCCTGGAATATACTTCTTGGTGAATTTTTGGATGAAGCCATTAAATTAATTGCTTGCCATCATGAGCAGAAGCAAGCGTGACAACAATTTTTATAGTGTAGAGATTGGAGATTCTACATTCACAGTCCTGAAACGATATCAGAATTTAAAACCTATAGGCTCAGGAGCTCAAGGAATAGTATGCGCAGCTTATGATGCCATTCTTGAAAGAAATGTTGCAATCAAGAAGCTAAGCCGACCATTTCAGAATCAGACTCATGCCAAGCGGGCCTACAGAGAGCTAGTTCTTATGAAATGTGTTAATCACAAAAATATAATTGGCCTTTTGAATGTTTTCA…
>STRG.32911.2
GCACACTCGCGCACACTCGCGCTCGGGCGCACACGGAGCAGGGACCGGCGCCCGGAGCGAGCCAGGGAGCGGCTAACCGGGGACCCACCGCGCGGAGCCAGCCTAGCTGCCAGCGAGCCCAACCCGCGACGACCCACGCCCCTGAGCCCCGCAGCCGACCCCTGCCGGCCGGTGTCCCCACCGCCATCCCTGACCCATGGCGCTGAAGAGGATTCAGAAAGAATTGAGTGATCTACAGCGCGATCCACCTGCTCACTGTTCAGCTGGACCTGTGGGAGATGACTTGTTCCACTGGCAAGCCACTATTATGGGGCCTCCTGATAGCGCATATCAAGGTGGAGTCTTCTTTCTCACTGTACATTTTCCGACAGATTATCCTTTTAAACCACCAAAGATTGC…
>STRG.32963.1
GGGCGCCCGGCCACCGTCGTAGGTGCGGGCCGCATGAATGGAGCGCCGGGCGTAAGGCAAAGCCTGGCACCGTCTGCGCGGCCGCTATCTGCTCCCGGAGCGTGAGTGCGGGGTGTGGGGCGTGCGCGTGCGCGCTCAGAGGGGGCTCAAGGCGAGCGCGCCGGGCAGTTGCGGGCGCGTGGCTGCTGAGGTTGGCGGCGGTGCCGCGCGCCCGACGGGCCGGTGGTTGCGGGGCCTCCCGCCTCGACCCGGGCTGGGGGCAGCCGTGGCGGCCGCCGGGGACCGCAAGGGGCGGAGGAAAGGAGGGGGCCGGTCCCGGCACGCAGAGGAGCAGCCGACCATGCCCCGAGACAACATGGCCTCCTTGATCCAACGGATCGCCCGCCAGGCTTGCCTCAC…
>STRG.33251.1
AGTTGAGAGATGGCGGCCGCCGCAGGTAGATCGCTCCTGCTGCTCCTCTCCTCTCGGGGCGGCGGCGGCGGGGGCGCCGGCGGCTGCGGGGCGCTGACTGCCGGCTGCTTCCCTGGGCTGGGCGTCAGCCGCCACCGGCAGCAGCAGCACCACCGGACGGTACACCAGAGGATCGCTTCCTGGCAGAATTTGGGAGCTGTTTATTGCAGCACTGTTGTGCCCTCTGATGATGTTACAGTGGTTTATCAAAATGGGTTACCTGTGATATCTGTGAGGCTACCATCCCGGCGTGAACGCTGTCAGTTCACACTCAAGCCTATCTCTGACTCTGTTGGTGTATTTTTACGACAACTGCAAGAAGAGGATCGGGGAATTGACAGAGTTGCTATCTATTCACCA…
>STRG.33277.1
ATCCGCTTCCGGAGTCGAGGTTTTCGGGCTTGTACCGCTTGGCGGTGCGGCCTGGTGTCGGCTTGCAGGTTCTTTCTGTGTTTGTTCTCTGCCCTGCCAAGGCCGTAGAGCTGGTGCGTGCGGGTAGCGGGGCTCTCCGAGGAGCCGCACGCCGGCGGCACCATGGTCCACCTCACTACTCTCCTCTGCAAGGCCTACCGTGGGGGCCACTTAACCATCCGCCTTGCCCTGGGTGGCTGCACCAATCGGCCGTTCTACCGCATTGTGGCTGCTCACAACAAGTGTCCCAGGGATGGCCGTTTCGTAGAGCAGCTGGGCTCCTATGATCCATTGCCCAACAGTCATGGAGAAAAACTCGTTGCCCTCAACCTAGACAGGATCCGTCATTGGATTGGCTGC…
>STRG.33141.1
AGAGGACAGGGTTGCGGCGGGCGGAACGGTGTCTCCTTCACTTCGCCCTCCAGCTGCTGGAGCTGCAGCCCGACCGCGAGCGTGCCAAGCGGCTTCAGCAGCTAGCGGAGCGGTGGCGGCGGCCCCCCTCAGGACACCACCAGATTCCCCTCTTCCCGCGGCCTCGCCATGGCGACCCACGGACAGACTTGCGCGCGTCCAATGTGTATTCCTCCATCATATGCTGACCTTGGCAAAGCTGCCAGAGATATTTTCAACAAAGGATTTGGTTTTGGGTTGGTGAAACTGGATGTGAAAACAAAGTCTTGCAGTGGCGTGGAATTTTCAACGTCCGGTTCATCTAATACAGACACTGGTAAAGTTACTGGGACCTTGGAGACCAAATACAAGTGGTGTGAG…
>STRG.33384.2
GTCCTGAAGCGCGCTCCCGGGGAGGTGTTGCAGCCATGGCTACGGCAGCCGGCGCGACCTACTTTCAGCGAGGCAGTCTGTTCTGGTTCACAGTCATCACCCTCAGCTTTGGCTACTACACATGGGTTGTCTTCTGGCCTCAGAGTATCCCTTATCAGAACCTTGGGCCCCTGGGCCCCTTCACTCAGTACTTGGTGGACCACCATCACACCCTCCTGTGCAATGGGTATTGGCTTGCCTGGCTGATTCATGTGGGAGAGTCCTTGTATGCCATAGTATTGTGCAAGCATAAAGGCATCACAAGTGGTCGGGCTCAGCTACTCTGGTTCCTACAGACTTTCTTCTTTGGGATAGCGTCTCTCACCATCTTGATTGCTTACAAACGGAAGCGCCAAAAAC…
>STRG.33487.1
CTCCCTAGTCGCGGGGAGTCTGAGAAAGCGCGCCTGTTTCGCGACCATCACGCACCTCCCCTCCGCTTGTGGCCATGTACCGCTACCTGGGCGAAGCGCTGTTGCTGTCCCGGGCCGGGCCCGCTGCCCTGGGCTCGGCGTCCGCCGACTCGGCCGCGTTGCTGGGCTGGGCCCGGGGACAGCCCGCCGCCGCCCCGCAGCCGGGGCTGGCATTGGCCGCCCGGCGCCACTACAGCGAGGCGGTGGCCGACCGCGAGGACGACCCCAACTTCTTCAAGATGGTGGAGGGCTTCTTCGATCGCGGCGCCAGCATCGTGGAGGACAAGCTGGTGGAGGACCTGAGGACCCGGGAGAGCGAGGAGCAGAAGCGGAACCGGGTGCGCGGCATCCTGCGGATCA…
>STRG.33491.14
CTTCCTCCATTATCTCACTGCCTCCGGTGGCTGCTGGGATACCGGAGGACTCGGGTCCCGGCTCGACTCAGTCCTCCAGCCGCCCGGGGAATACCTCTAGTTCTTCCCGGCCGCCGCCGCCTCCGCCCCGCCGCTTCCTCCTCCGCCTGCCGGCCTCCTTCGCCCCGCCCCGTCCGCGCAGCTCGTCCGGCCCGCCCGCAGGCCAGCTTCTCTCGGGAGCCTCCACCCAGGCGCATGGCTCCATGAAGCAAGAGGAGGAGGCAGAGCGCGAGAGATCCCGTCCGCCCCAGCCGCGTCTGGGCCAGGAGAAAAGCAAAACCATATTCCTGCTGCTGTCAGTTTTGATGCACTGAGAAAACTTCAGAGACCTAAGCTTTTTCCAGAGAAGAGAAGCTTTAC…
>STRG.33509.2
GCACTCCACTGACCGTCCCGACGATGCTACGCGCGCCCGGCTGCCTCCTCCGGACCTCCGTAGCGCCTGCCGCGGCCCTGGCTGCGGCGCTGCTCTCGTCGCTTGCGCGCTGCTCTCTTCTAGAGCCGAGGGACCCGGTGGCCTCGTCGCTCAGCCCCTATTTCGGCACCAAGACTCGCTACGAGGATGTCAACCCCGTGCTATTGTCGGGCCCCGAGGCTCCGTGGCGGGACCCTGAGCTGCTGGAGGGGACCTGCACCCCGGTGCAGCTGGTCGCCCTCATTCGCCACGGCACCCGCTACCCCACGGTCAAACAGATCCGCAAGCTGAGGCAGCTGCACGGGTTGCTGCAGGCCCGCGGGTCCAGGGATGGCGGGGCTAGTAGTACCGGCAGCCGCG…
>STRG.33526.2
ACTGCGACTCGAGACAGCGGCCCGGCAGGACAGCTCCAGAATGAAAATGCGGTTCTTGGGGTTGGTGGTCTGTTTGGTTCTCTGGACCCTGCATTCTGAGGGGTCTGGAGGGAAACTGACAGCTGTGGATCCTGAAACAAACATGAATGTGAGTGAAATTATCTCTTACTGGGGATTCCCTAGTGAGGAATACCTAGTTGAGACAGAAGATGGATATATTCTGTGCCTTAACCGAATTCCTCATGGGAGGAAGAACCATTCTGACAAAGGTCCCAAACCAGTTGTCTTCCTGCAACATGGCTTGCTGGCAGATTCTAGTAACTGGGTCACAAACCTTGCCAACAGCAGCCTGGGCTTCATTCTTGCTGATGCTGGTTTTGACGTGTGGATGGGCAACAG…
>STRG.33664.1
ATCGTGCGGGACGTGGACGGAAGAAAAAAGAGAGTGAGCGAGCGCCGGAATCAGCCCGGCGTGGAGTGCGGACCCGCGGTAGTGCCAGGGGGCGAAGGCGGCGGTGGTGAGGAAGATACTTTGGTTAGTGACCACATCGCAGCATGTTGAGTCAAGTTTACCGCTGTGGGTTCCAGCCCTTCAACCAACATCTTCTGCCCTGGGTCAAGTGTACAACCGTCTTCAGATCTCATTGTATCCAGCCTTCAGTCATCAGACATGTTCGTTCTTGGAGCAACATCCCGTTTATCACTGTACCCCTCAGTCGTACACATGGCAAGTCCTTCGCCCACCGCAGTGAGCTGAAGCATGCCAAGAGAATCGTGGTGAAGCTCGGCAGTGCCGTGGTGACCCGAGGGG…
>STRG.33666.2
CGTCGGACCCGGAGGCCCTGAATGCCCCATGCGCACCCCACAGCTCGCGCTCCTGCAAGTGTTCTTTCTGGTGTTCCCCGATGGCGTCCGGCCTCAGCCCTCTTCCTCCCCATCAGGGGCAGTGCCCACGTCTTTGGAGCTGCAGCGAGGGACGGATGGCGGAACCCTCCAGTCCCCTTCAGAGGCGACTGCAACTCGCCCGGCCGTGCCTGGACTCCCTACAGTGGTCCCTACTCTCGTGACTCCCTCGGCCCCTGGGAATAGGACTGTGGACCTCTTCCCAGTCTTACCGATCTGTGTCTGTGACTTGACTCCTGGAGCCTGCGATATAAATTGCTGCTGCGACAGGGACTGCTATCTTCTCCATCCGAGGACAGTTTTCTCCTTCTGCCTTCCAGG…
>STRG.33716.1
GAGAACTTGCGCGGGAGCCGGACTGAGCGGTGCGAGCGCGCAGGCGCGGCCGACGGGGCGGGCTGCTACTCCGGAATCTGCTAATCCCAGTCGGTGCCGCATCCCCAGCCCGCCGCCATGGCCGCCTACAAACTGGTGCTGATCCGGCACGGCGAGAGCGCATGGAACCTGGAGAACCGCTTCAGCGGCTGGTACGACGCCGACCTGAGCCCGGCGGGCCACGAGGAGGCGAAGCGCGGCGGGCAGGCGCTACGAGATGCTGGCTATGAGTTTGACATCTGCTTCACCTCAGTGCAGAAGAGAGCGATCCGGACCCTCTGGACAGTGCTAGATGCCATTGATCAGATGTGGCTGCCAGTGGTGAGGACTTGGCGCCTCAATGAGCGGCACTATGGGGGT…
>STRG.33729.1
ATACCTGGCTAGGGCCGAGGATTGGCTGTTCCGGGGCTAGGGAGCGCTTTCTCCCGGGAACCGCGGCTGTGACCCAAGTGGCCCGGACCAGTTTGGGGCTGCGTGCGGCCTGCCTCAAGCAACCAGGTACGTAGGTCGGCGGCCCAGCTCGGCGCTGCGGTGGGAGCCGGAGGGCGACAGTCAGAGCCGGGGTGCCAGCGGGACGCGACCGCCAGATCCACTTAGGACCCCGTCGTTCTGCGAAGCGGCCACGTCTGAGTCCCGGGGCCTCCTCGTGCTGCAGATGTCGCCTTAGGACCTCGGCCAGGATACCCTCTGCCATGCTCTTGTGCTGCCCGTGATCACCGACTGGCCCTTGTAAGCACCTTCGCAGAGCTGCGCCTGCCCTTTCTGAAGGCT…
>STRG.33769.1
AGACCTGACCTGCCAGCTCCGGGCGTGGGGTGAAATCTCTTGATTCCTAGTCTCTCGATATGGCACCTCCGTCAGTCTTTGCCGAGGTTCCGCAGGCCCAGCCTGTCCTGGTCTTCAAGCTCACTGCCGACTTCAGGGAGGATCCGGACCCCCGCAAGGTCAACCTGGGAGTGGGAGCATATCGCACGGATGACTGCCATCCCTGGGTTTTGCCAGTAGTGAAGAAAGTGGAGCAGAAGATTGCTAATGACAATAGCCTAAATCACGAGTATCTGCCAATCCTGGGCCTGGCTGAGTTCCGGAGCTGTGCTTCTCGTCTTGCCCTTGGGGATGACAGCCCAGCACTCAAGGAGAAGCGGGTAGGAGGTGTGCAATCTTTGGGGGGAACAGGTGCACTTC…
>STRG.33875.1
CTCTGCTCACCTCATCCACGGGAGACGGAAGTCTTGGCCCTGCTCCGCTCCCCCGAGAATCGGGCCTCGCCCTGCTGGGCGGCTGGACCTGGGCAAAGCCTGGGCGCGCTCCCGCGCAGCGGCGCCATGAAGCGCTCGGGGACTCTGCGGCTGCTCTCGGACCTGAGCGCCTTCGGCGGCGCGGCGCGGCTCCGGGAGCTGGTGGCCGGGGACTCAGCGGTCCGAGTCCGTGGCAGTCCGGACGGCCGCCACTTGCTGCTCCTGCGACCCCCTGGGGCGGTAGCCCCACAGCTGCTAGTCGCGTCGCGAGGGCCCGGCGCGGAGCTAGAGCGGGCCTGGCCGGCCGGCCAGCCCTCCCCGCTGGACGCCTTCTTCCTGCCGTGGCCAGCGCGGCCGGCG…
>STRG.33950.2
GGGCAGGGGGCGGGCTCAGGCCGGAACTCCAGAGACGACCTCAGCCAACTGCTCCTGCGCCGGGCGGGGTCGTCGCCGCCAGCGGCTCCGAGCGCCGGAAGGGCCAGGTCTCAGGGCTCCTGGAGCTGCAGGCGGCGGGAGGGGCTACAAATGCTTGACTCAGTGATGCAGAACCTTTCAGAGTTAGCTGGAAGCCACAGCCCTGCCTCTTGATGCAGCCTGGATCCAGCCGGTGTGAAGAGGAGACCCCTTCCCTCTTGTGGGGTTTGGATCCTGTGTTTCTAGCCTTTGCAAAACTCTACATCAGGGATATCCTGGACATGAAGGAGTCCCGCCAGGTGCCAGGTGTATTTTTGTACAATGGACATCCAATAAAACAGGTAGATGTCTTGGGAACTG…
>STRG.33962.3
GCAAACCCCAGAGGAGCTCGGCCTGCGCTGCGCCACGATGTCCGGGGAGTCAGCCAGGAGCTTGGGGAAGGGAAGCGCGCCCCCGGGGCCGGTCCCGGAGGGCTCGATCCGCATCTACAGCATGAGGTTCTGCCCGTTTGCTGAGAGGACGCGTCTAGTCCTGAAGGCCAAGGGAATCAGGCATGAAGTCATCAATATCAACCTGAAAAATAAGCCTGAGTGGTTCTTTAAGAAAAATCCCTTTGGTCTGGTGCCAGTTCTGGAAAACAGTCAGGGTCAGCTGATCTACGAGTCTGCCATCACCTGTGAGTACCTGGATGAAGCATACCCAGGGAAGAAGCTGTTGCCGGATGACCCCTATGAGAAAGCTTGCCAGAAGATGATCTTAGAGTTGTTTTC…
>STRG.34048.1
GGAGCTCGCTATGCTTAACCTGGAGATGATTAAGGCCCCGCTTCCTGGCCTCCCAGCCTCTAATGCCAAAAGATAAGGGAGAGGCTGGCGTGTGACCCCGTTTTGAGTCAGGTGGACAGAGGGCTGGCCACCTTCGGAACCATGGGTGCAATACGGAGTCAGACCTCAATACAAGCCCACTCTTTCACATATTTGAACTTTTTTCACATATCAACTTTTTTTGTTCACTGTGCAGGGATTGTTCATTGCTGCTGGAGGAAGATCATGGACTGTCGCGGGAAACTGAAGTGGTTGAGTATCCACTAGTCGTGGATGAGGGCAGTGACTTCGCAGTTTTTTGCGAATTACACATCTCTTTGATTATGTTGTGACTAGTTTTGTTAGATAGTCATTTAGTGT…
>STRG.34070.1
ACTCTTGTTGCATCATCAGCGTGCACCTCCACGATGAAACAGGTCTGGGCTACAAAAGTATGGCCGCTTCTGAGGCGGCGGTGGTGTCTTCGCCGTCTTTGAAAACAGACACATCCCCTGTCCTTGAAACTGCAGGAACGGTCGCAGCAATGGCTGCGACCCCGTCAGCAAGGGCTGCAGCCGCGGTGGTTGCGGCCGCGGCCAGGACCGGATCCGAAGCCAGGGTCTCCAAGGCCGCTTTGGCTACCAAGCTGCTGTCCTTGAGCGGCGTGTTCGCCGTGCACAAGCCCAAAGGGCCCACTTCAGCCGAGCTGCTGAATCGGTTGAAGGAGAAGCTGCTGGCAGAAGCTGGAATGCCTTCTCCAGAATGGACCAAGAGGAAAAAGCAGACTTTGAAAA…
>STRG.34127.1
GTGGCGCCCGAGTGCACTGAAGATGGCGGCTGCTGTAGGACGGTTGCTCCGAGCGTCGGTTGCCCGACATGTGAGTGCCATTCCTTGGGGCATTTCTGCCACTGCAGCCCTCAGGCCTGCTGCATGTGGAAGAACGAGCTTGACAAATTTATTGTGTTCTGGTTCCAGTCAAGCAAAATTATTCAGCACCAGTTCCTCATGCCATGCACCTGCTGTCACCCAGCATGCACCCTATTTTAAGGGTACAGCCGTTGTCAATGGAGAGTTCAAAGACCTAAGCCTTGATGACTTTAAGGGGAAATATTTGGTGCTTTTCTTCTATCCTTTGGATTTCACCTTTGTGTGTCCTACAGAAATTGTTGCTTTTAGTGACAAAGCTAACGAATTTCACGACGTGAA…
>STRG.34180.2
GGCGCGCTGCATTGTGGGGTGGCGGCGGCGGCCGCGCTAGCGACGCGGGGCCGGGCGGCTGAGCGTTCGCGGGGCCGAGGCCATGGCTTTCTGGGCGGGGGGTTCGCCCAGCGTCGTGGACTATTTCCCTAGCGAGGACTTCTACCGCTGCGGCTACTGCAAGAACGAGTCGGGCAGCCGCTCCAATGGCATGTGGGCACATTCCATGACAGTACAGGATTATCAGGATCTCATAGACCGAGGATGGCGAAGAAGTGGAAAATATGTGTACAAACCTGTCATGAATCAAACATGTTGTCCTCAGTACACAATAAGGTGCCGACCTTTACAATTTCAGCCTTCAAAATCTCACAAGAAGGTTTTGAAAAAAATGTTGAAATTTCTAGCTAAAGGGGAGGT…
>STRG.34197.1
ACTCGCACCCGCTGCCCCCGAGGCCCTCCTGCACTCTCCCCGGCGCCGCTCTCCGGCCCTCGCCCTGTCCGCCGCCACCGCCGCCGCCGCCAGAGTCGCCATGCAGATCCCGCGCGCCGCTCTTCTCCCGCTGCTGCTGCTGCTGCTGGCGGCGCCCGCCTCGGCGCAGCTGTCCCGGGCCGGCCGCTCGGCGCCTTTGGCCGCCGGGTGCCCAGACCGCTGCGAGCCGGCGCGCTGCCCGCCGCAGCCGGAGCACTGCGAGGGCGGCCGGGCCCGGGACGCGTGCGGCTGCTGCGAGGTGTGCGGCGCGCCCGAGGGCGCCGCGTGCGGCCTGCAGGAGGGCCCGTGCGGCGAGGGGCTGCAGTGCGTGGTGCCCTTCGGGGTGCCAGCCTCGGCCAC…
>STRG.34207.2
ACTGGAAGAGAGGTTCCGGGGCTGGGCTGGCCTGACTGAAGGCGGCGGAATGGAGACGCGGACCGAGGACGGGGGCCTCACCCGCCGCCCCACGCTGGCCTCTTCTTGGGATGTTGCAGGCGGGGCCCTGACCCACAGCCTCCTCCTCACCCGGGCCGGTCTCGGCCCCGGTGACTTCGACTGGGAGGAGCTGCTGGCACCGCCTGCTCCAGGTCAGGATCTGGTGATTTTGAAGAGAAACCACAACAACAAAGATGAAAACCCCTGCTTCCTTTACCTGAGGTGTGGCCCTGATGGAGGTGAAGAAATCGCTTCTATTGGCATTTTAAGTTCAGCAAGAAATATGGAAGTGTACTTAGGAGAGGAGTACTGTGGAACCAGTAGGGGCAAGAATGTTTG…
>STRG.34210.1
ACAACAAAGATGGCGGCGGCGACTGTGACGGTGACGAAGACGGCGGCGGCGGCGACGGCATTTAACAAGGCGGTGTGGTTTACTCCATGCAGTTGTCAGGAGACCTCTGTATGGCTTTTCAATTTTAGTTGAAATTCTCTCTCCATGGCCTTTTGGAGTCCCTTGCTGTATCTCCGAAGTAAATTTCAATTACTCTACATTTCATCAATGTTGGAGTGGCAAGAAAAAGGAGGAACAGATTTGGGGTGAAAAGTTTTGTTTTCTAGGTCTAACAAACTGTAAATGTTAAAAAAGCAAAGATGGGTGAAAAAAAACCAGAGCCTTTGGACTTCGTGAAAGATTTTCAGGAATACCTGACTCAGCAGACCCATCACGTGAACATGATTTCTGGATCAGTTA…
>STRG.34240.1
GTTGCGCTTCATAGACGCCGCGTGTACCCGGTTGTCCTCAGGCGCTGTCAGATCTGTGGTTTTTCTACTTGAAGGACACAATGTTTTCCAAACTAGCACATTTGCAGAGGTTTGCTGTACTTAGTCGCGGAGTTCATTCTTCAGTGGCTTCTGCTACATCTGTTGCAACTAAAAAAACAGTCCAAGGCCCTCCAACCTCTGATGACATTTTTGAAAGGGAATATAAGTATGGTGCACACAACTACCATCCTTTACCTGTAGCCCTGGAGAGAGGAAAAGGTATTTACTTATGGGATGTAGAAGGCAGAAAATATTTTGACTTCCTGAGTTCTTACAGTGCTGTCAACCAAGGGCATTGTCACCCCAAGATTGTGAATGCTCTGAAGAGTCAAGTGGACA…
>STRG.34241.1
GGAAAGCTACCGCCAAGCCACAGCCGAAGGCAAGCCCGAGCGGCGCCATCCCCAACCCCGCGCCGCCGACCGCCGGCCCGTGGGCGACGGGCATGCTGGCATGGCAGGACGGCGGGGCCAAGGCGGCTCCCTCCCACCACAAGATTTCTTTCTCTGTCCTGGACATCCTGGACCCACAGAAATTCACCCGCGCAGCGCTCCCTGCCGTGCGCCCGGCTCCCCGGGAAGCCAGGAAAAGTTTGGCGGAGGTCGAAGCGGGGAAAGATGCCAGCTCCAGGGACCCTGTCCGACAGCTGGAGACCCCTGATGCTGCGGGCCCAGGCGCCGGCCAGGCGTCCCCCCTGGAGGGTTCCGAGGCGGAAGAGGAGGAGGATGCGGAGGATCCGAGGAGGCCGCGGC…
>STRG.34277.1
GCAGAATCATTTTCTGAACCAGCCAGGAAATACCGGAACCCACCAAACTTTAAACACCAGCCTAAATTATTCCTGTTCTTTTAAGCAGGCAGCAGAAATGACAGAAACCCGTTAACAGAAAAAAAAAAAATAATGCTTTTCATTTGAACTCCTGTGCATTTTCTTTTTAACTTATATGTGTTCCTAATTTTCCTTACTCTTTTTGTTTGTTTGTTTCTTAGTGTGGTTTATTGACAATCATTTACAATGCCGAAGAGTGCTGTAGTGAGCCAGCACAGTGGGTAACACAGCAACGGAGAACAGATGCAGGTTTGAGGAATTTAACTTGCTAAAACCTTGAACTGAAGTCTTAGAGATTGGAACATACGGGTTTGTATAAATAGGCTTTTAAGCCCTGTT…
>STRG.34326.1
AGTCCGGGAGCGCAGCTGGGCCGCGGCGCTCCGACCTCCGCTTTCCCACCGCCCGCAGCTGAAGCACATCCCGCAGCCCGGCGCGGACTCCGATCGCCGCAGTTGCCCTCTGGCGCCATGTCGCAGAACGGAGCGCCCGGGATGCAGGAGGAGAGCCTGCAGGGCTCCTGGGTAGAACTGCACTTCAGCAATAATGGGAACGGGGGCAGCGTTCCAGCCTCGGTTTCTATTTATAATGGAGACATGGAAAAAATACTGCTGGACGCACAGCATGAGTCTGGACGGAGTAGCTCCAAGAGCTCTCACTGTGACAGCCCACCTCGCTCGCAGACACCACAAGATACCAACAGAGCTTCTGAAACAGATACCCATAGCATTGGAGAGAAAAACAGCTCACAG…
>STRG.34377.1
GACAGGCTGCGCCCGCCCGCGCCCGGGGTGATGCAGTTGCCCCCCGCGCTGTGCGCCCGCCTCGCTGCGGGGCCCGGGGCGGCGGAGCCGCTGCCTGTAGAGCGGGATCCCGCGGCTGGGGCCGCGCCCTTTCGCTTCGTTGCGCGCCCCGTGCGCTTCCCGCGGGAGCACCAGTTCTTCGAGGATGGGGACGTGCAGCGCCACCTCTACCTCCAGGACGTGATCATGCAGGTGGCCGACGTGCCTGAGAAGCCCAGGGTGCCCGCGTTTGCCTGCCAGGTGGCCGGCTGCTGCCAGGTGTTCGATGCCCTGGACGACTACGAGCACCACTACCACACGCTGCACGGAAATGTTTGCTCCTTTTGCAAGCGGGCCTTCCCTTCCGGACACCTGCTGGAC…
>STRG.34389.1
GGGCGAGGAGTCCAGAGAGCCATGGCCGCCCTGCGTGTCCTGCTGTCCTGCGTCCGCGGCCCGCTGAGGCCCCCGGTTCGCTGTCCCGCCTGGCGTCCCTTCGCCTCGGGTGCTAACTTTGAGTACATCATCGCAGAAAAAAGAGGGAAGAATAACACCGTGGGGTTGATCCAACTGAACCGCCCCAAGGCCCTCAATGCACTTTGCGATGGCCTGATTGACGAGCTCAACCAGGCCCTGAAGACCTTCGAGGAGGACCCGGCCGTGGGGGCCATTGTCCTCACCGGCGGGGATAAGGCCTTTGCAGCTGGAGCTGATATCAAGGAAATGCAGAACCTGAGTTTCCAGGACTGTTACTCCAGCAAGTTCTTGAAGCACTGGGACCACCTCACCCAGGTC…
>STRG.34452.1
ACAATGCACCGCACACCCTTTACTGGCCGGCCCCGCGCTGCTCTCCTAAGACCCCGCGGGCCAGCGCCGCGACCCCTTCCCAGCGCTCCTCGCGCTGTGTGCGGCGCGTCCTCTCGCCGGTGACCCGGTGTGCGTGGGGTCGAGGCGCCGGGCGGAGTGGCTCCGGGCCGAAACGCCATGCGGAGGGGCGAGCGCAGGGACGCCGGAGGTCCGCGGCCCGAGTCCCCGGTGCCCGCGGGCAGGGCCTCGCTGGAGGAGCCGCCTGACGGGCCGTCTGCCGGCCAAGCCACCGGGCCGGGCGAGGGCCGCCGCAGCACCGAGTCCGAGGTCTACGACGACGGCACCAACACCTTCTTCTGGCGAGCCCACACCTTAACCGTGCTCTTCATCCTCACCTGT…
>STRG.34453.9
GCCGAGCCCCGCCCAGTAGTCCCCGCCCACGCACCTGACCACGCCCACGAGCCGGCTCGAACACGCCCGCGCCGCTGACTGGCGGGTGGGGTTGTCGACACGTTCAACCCGTTCTGCTGGCTCGAGAACGAAGTAGGCCGTCTCGCTCTGGGTCTCCAGGCCCGCGACCGTCCGCCAGTCGTCCCGAGAATCTCCGGCCTGTGAAACTGTGAGGGGATTCGGCCAAGACGTCCTCTTCCCTCTGCCTCCCACCCAGGCCACTCTTCACCTCCACCATGAGCCTGGACATCCAGAGCCTGGACATCCAGTGTGAGGAGCTGAGCGACGCTAGATGGGCCGAGCTCCTCCCTCTGCTCCAGCAGTGCCAAGTGGTCAGGCTGGACGACTGTGGCCTCACGG…
>STRG.34496.5
GCGCTGGAGCGTTTTCCGGCCGTGCGTTTGTGGCCGTCCGGCCTCCCTGACATGCAGATTTCCACCCAGAAGACAGAGAAGGAGCCAGTGGTCATGGAATGGGCTGGGGTCAAAGACTGGGTGCCTGGGAGCTGAGGCAGCCACCGTTTCAGCCTGGCCAGCCCTCTGGACCCCGAGGTTGGACCCTACTGTGACACACCTACCATGCGGACACTCTTCAACCTCCTCTGGCTTGCCCTGGCCTGCAGCCCTGTTCACACTACCCTGTCAAAGTCAGATGCCAAAAAAGCCGCCTCAAAGACGCTGCTGGAGAAGAGTCAGTTTTCAGATAAGCCGGTGCAAGACCGGGGTTTGGTGGTGACGGACCTCAAAGCTGAGAGTGTGGTTCTTGAGCATCGC…
>STRG.34678.2
GCGGCGGGCTGCGGGCGCGGCCGGACGGGAGTTCCCCGGAGAAGGATCCTGCAGCCCGAGTCCCGTCCTCAGGCTTCCCCAATCCAGGGGACTCGGCGCCGGGACGCTGCTATGGACGACATTTTCACTCAGTGCCGGGAGGGCAACGCAGTCGCCGTTCGCCTGTGGCTGGACAACACGGAGAACGACCTCAACCAGGGGGACGATCATGGCTTCTCCCCCTTGCACTGGGCCTGCCGAGAGGGCCGCTCTGCTGTGGTTGAGATGTTGATCATGCGGGGGGCACGGATCAATGTAATGAACCGTGGGGATGACACCCCCCTGCATCTGGCAGCCAGTCATGGACACCGTGATATTGTACAGAAGCTATTGCAGTACAAGGCAGACATCAATGCAGTG…
>STRG.34756.2
GCTGGAGGAGCTCGAGGCTGAGGCTGCCGGGGGGCTGTGGGCTACCGGGCCGCCGGCGCCTCAGCGATGTTTTACTCAGGGCTCCTCACTGAGGGCGGCCGCAAGGAGACCGACATGCGGGAGGCGGCGTCACTGCGACAGCAGCGCCGGATGAAGCAGGCGGTGCAGTTCATCCACAAGGACTCCGCCGACCTGCTGCCCCTGGACGGCCTCAAGAAGCTGGGCTCGTCCAAGGACATGCAACCTCATAATATTCTGCAGAGGCGCCTCATGGAAACCAACCTGTCTAAGCTCCGAAGCGGTCCCCGTGTCCCTTGGGCCTCTAAGACGAACAAACTCAATCAGGCTAAGTCTGAGGGGCTAAAGAAGTCTGAGGAGGATGACATGATTTTGGTTTCT…
>STRG.34809.2
GCCAGCAGTGAGTCGGAGCTCTATGGAGGTGGCAGCGGGTACCGAGTGGCGGCTGCAGCAGCGACTCCTCTGAGCTGAGTTTGAGGCCGTCCCCGACTCCTTCCTCCCCCTTCCCTCCCCCTTTTTTTTGTTTTCCGTTCCCCTTTCCCCTCCCTTCCCTATCCCCGACGACCGGATCCTGAGGAGGCAGCTGCGGTGGCAGCTGCTGAGTTCTCGGTGAAGGTATTTCATTTCTCCTGTCCCCTCCCCTCCCCACCCCATCTATTAATATTATTCTTTTGAAGATTCTTCGTTGTCAAGCCGCCAAAGTGGAGAGTGCGATTGCAGAAGGGGGTGCTTCTCGTTTCAGTGCTTCTTCGGGCGGAGGAGGAAGTAGGGGTGCACCTCAGCACTATCCCA…
>STRG.34854.1
AGACGGCCATTTGTGGCGGCGCTGGAGGCTGCGTTCGGCAGGCGCTGCGGAGACGCGTAGAGGAGCGCGCCCCCCGGCCGCTGCCGCCCCTGGCCCGTGCCGTCACCCCGCTTCTCCGCGCCTCGGGCGGTACCCAGCCAGTCCCCAGCGCCGCGCTACCGCGCTGACCGGCCCTCCAGACGCCTCCCGGTACCCGGGACCCCAGCCCGGCCGCTCGCCCGCAGCCCGCCGGCCGCACACGTCCCCGGAGCCGGGCCTAGGGCGGGCGGCAGCGGCGGCTCGGCGCAGTCAGGCTGGGCTCTGTAGCGTCCCCATGGCCGCGGCCGGCTGGCGGGACGGCTCCGGCCAGGAGAAGTACCGGCTCGTGGTGGTCGGCGGGGGCGGCGTGGGCAAGTCGGC…
>STRG.34859.2
ATAGCCGGAGTAGACGGAGCCGCAGTAGACGGATCCGCGGCTGCACCAAACCACTGCCCCTCGGAGCCTGGTAGTGGGCCACAAGCCCCCAGTCCCAGAGGCGTGATTTTCTGGCATCCTTAAATCTTGTGTCAAGGATTGGTTATAATATAACCAGAAACCATGACGGCGGCTGAGAACGTATGCTACACGTTAATTAACGTGCCAATGGATTCAGAACCACCATCTGAAATTAGCTTAAAAAATGATCTAGAAAAAGGAGATGTAAAGTCAAAGACTGAAGCTTTGAAGAAAGTAATCATTATGATTCTGAATGGTGAAAAACTTCCTGGACTTCTGATGACCATCATTCGTTTTGTGCTACCTCTTCAGGATCACACTATCAAGAAATTACTTCTG…
>STRG.34938.4
TAAAAGCCGGGCGTTCGGAGGACCCAGCAATTAGTCTGATTTCCGCCCACCTTTCCGAGCGGGAAGGAGAGCCACAAAGCGCGCATGCGCGCGGATCACCGCAGGCTCCTGTGCCTTGGGCTTGAGCTTTGTGGCAGTTAATGGCTTTTCTGCACGTATCTCTGGTGTTTACTTGAGAAGCCTGGCTGTGTCCTTGCTGTAGGAGCCGGAGTAGCTCAGAGTGATCTTGTCTGAGGAAAGGCCAGCCCCACTTGGGGTTAATAAACCGCGATGGGTGAACCCTCAGGAGGCTATACTTACACCCAAACGTCGATATTCCTTTTCCACGCTAAGATTCCTTTTGGTTCCAAGTCCAATATGGCAACTCTAAAGGATCAGCTGATTTATAATCTTCTAAAG…
>STRG.34953.1
AGTTGGCTGTAGCTGGGCGCCTCGGTTAGGTGCGCTGTCAGTCCTTTCCGAGTGCCTGGCCCAGTCTCTCCCGCCTCGGCCCAACATGGACTTCAGAGAAATTCTCATGATAGCTTCCAAGGGACAAGGTGTCAACAATGTGCCGAAAAGGTATAGTTTGGCAGTGGGGCCTCCAAAAAAAGACCCAAAAGTTAAAGGTGTCCAATCAGCAGCTGTACAAGCTTTTCTTAAAAGGAAAGAAGAGGAGCTGAGACGAAAAGCCTTAGAGGAGAAAAGGAGAAAAGAGGAACTAGTGAAAAAGCGAATTGAGCTCAAACATGACAAGAAAGCAAGAGCTATGGCCAAGAGGACAAAGGATAATTTCCATGGTTACAATGGGATTCCTATTGAGGAAAAGTC…
>STRG.34965.2
AGAGGCGACCCAAGGCGGGCTGGCGGGCTGGCGGCAGTCGCTACTTGCCTAGTAGCCTCAGCCGCTGTGGGCTCCTGGGGAGATGGAGGGGCCGGGGCTGGGCTCGCAGTGCAGGAATCACAGCCATGGCCCCCACCCTCCAGGATTTGGTCGATATGGCATCTGTGCACATGAAAACAAAGAACTTGCCAATGCAAGAGAAGCTCTTCCTCTTATAGAGGACTCTAGTAACTGTGACATTGTCAAAGCTACTCAATACGGAATTTTTGAACGATGTAAAGAGTTGGTAGAAGCAGGATATGATGTCAGGCAACCAGATAAAGAAAATGTGTCGCTTCTTCATTGGGCTGCTATTAACAACAGACTGGATCTTGTAAAGTTTTATATTTCAAAAGGTGC…
>STRG.34976.1
AGACACGCCGGGCTCTCGGGGCACCACAGCCATGTGCTCGTTAGCGTCAGGCGCTACCGGCGGCCGGGGCGCTGTGGAGAATGAGGAGGACCTGCCAGAACTGTCGGACAGCGGGGACGAGGCCGCCTGGGAGGATGAGGACGATGCAGATCTCCCCCACGGCAAGCAGCAGACCCCCTGCCTGTTCTGTAACAGGTTATTCACATCTGCTGAAGAAACATTTTCACACTGTAAGTCTGAGCATCAGTTTAATATTGACAGCATGGTTCATAAACATGGACTTGAATTTTATGGATACATTAAGCTAATAAATTTTATTAGACTTAAGAATCCTACAGTTGAGTACATGAATTCCATATACAACCCAGTGCCTTGGGAGAAAGAAGAGTATTTGAAGCC…
>STRG.35105.4
AACACTGGAGGCTCTAAGATGGCGGCAGTGGCAACCTGCGGTAGTGTTGCCGCGAGTACTGGGTCTGCAGTGGCGACAGCCAGCAAGAGCAACGTCACCAGTTTCCAGAGGAGGGGTCCTAGAGCCAGCGTGACCAACGACAGCGGCCCTCGACTGGTGTCCATTGCGGGCACGCGACCGTCGGTGCGGAATGGACAGCTGCTGGTATCAACCGGGCTCCCAGCCCTAGACCAGCTCTTAGGTGGAGGTTTAGCCGTTGGAACAGTTCTTCTAATTGAGGAGGATAAATATAATATTTACTCACCTTTGCTCTTCAAGTATTTCCTGGCAGAAGGAATTGTCAATGGGCATACTTTGTTGGTTGCATCTGCTAAAGAGGATCCTGCCAACATTTTACAG…
>STRG.35127.1
CTCCGTCGGCCGCCTCCCCGGACCGAGGCAGGACCTCACCCCGCGCGTGTTCCCCGGGCGCCCCTCTGCGAACCCCAGGCCCTTCCCAGGTTTGCGCGCGGGGGCCATCCAGACCCTGCGGAGAGCGAGGCCCGGAGCGTCGCCGAGGTTTGAGGGCGCCGGAGACCGAGGGCCTGGCGGCCGAAGGAACCGCCCCAAGAAGAGCCTCTGGCCCGGGGGCTGCTGGAACATGTGCGGGGGGACACAGTTTGTTTGACAGTTGCCAGACTATGTTTACGCTTCTGGTTCTACTCAGCCAACTGCCCACAGTTACCCTGGGGTTTCCTCATTGCGCAAGAGGTCCAAAGGCTTCTAAGCATGCGGGAGAAGAAGTGTTTACATCAAAAGAAGAAGCAAACT…
>STRG.35142.2
GGTGGCAGCTGCCTCAGTGACGACTGCCGGCATCGCGGCGACCTGAGGAGATCAAGCCGCAGGCCCCGCCGTCGCCACCACTCCCGCCAGTCTTCCTTCTCCGCTCCCGGCCGGGGCGTCAGGAATGGGCCCCAATCGCCGTGGGCCCCGCACCCTGCGTCGCCCGTAGGCCCCAGTAGCCGGAGGCCGACCGGCCTCCCACTACCCCTCGCCCTAGCCAAGCCGTCCCCACCCCAAATCCCCGGGAAGGAAGATGAGGGAGACGGGCCCGGCGCTTAGCAGCCAGAGCAGCAGCAGCAGCAGCAGCGGTCGGGGGAGGGTGTTTCGCCGTTTCCTCTCAGCCGCCAGGACAAGATGGCAGCGGCCGCGGAGAGGGGCTGAGCCCGGGCTGGGTGGTGC…
>STRG.35147.3
AGAAGCGGCTCGAGGCTGGAAGAGGATCTTGGGCGCCGCCAGGTTCTGTGGACAATCACAATGGGAATCCAAGGAGGGTCTGTCCTGTTCGGGCTGCTGCTCGTCCTGGCTGTCTTCTGCCATTCAGGTCATAGCCTGCAGTGCTACAACTGTCCTAACCCAACTGCTGACTGCAAAACAGCCGTCAATTGTTCATCTGATTTTGATGCGTGTCTCATTACCAAAGCTGGGTTACAAGTGTATAACAAGTGTTGGAAGTTTGAGCATTGCAATTTCAACGACGTCACAACCCGCTTGAGGGAAAATGAGCTAACGTACTACTGCTGCAAGAAGGACCTGTGTAACTTTAACGAACAGCTTGAAAATGGTGGGACATCCTTATCAGAGAAAACAGTTCTT…
>STRG.35158.2
CACTAGGAGCGGCTCTCGGTGCAGCGGGACAGGGCGAAGCGGCCTGCGCCCACGGAGCGCGCGACACTGCCCGGAAGGGACCACCACCCTTGCCCCCTCAGCTGCCCACTCGTGATTTCCAGCGGCCTCCGCGCGCGCACGATGCCCTCGGCCACCAGCCACAGCGGGAGCGGCAGCAAGTCGTCCGGACCGCCACCGCCGTCGGGTTCCTCCGGGAGTGAGGCGGCCGCGGGAGCCGGGGCCGCCGCGCCGGCTTCTCAGCACCCCGCAACCGGCACCGGCGCTGTCCAGACCGAGGCCATGAAGCAGATTCTCGGGGTGATCGACAAGAAACTTCGGAACCTGGAGAAGAAAAAGGGTAAGCTTGATGATTACCAGGAACGAATGAACAAAGGGGAA…
>STRG.35162.1
AACAGGCAGATTTGCCTGCTGAGGGTGGAGACCCACGAGCCGAGGCCTCCTGCAGTGTTCTGCACAGCAAACCGCACGCTATGGCTGACAGCCGGGATCCCGCCAGCGACCAGATGCAGCACTGGAAGGAGCAGCGGGCCGCGCAGAAAGCTGATGTCCTGACCACTGGAGCTGGTAACCCAGTAGGAGACAAACTTAATGTTATTACAGTAGGGCCCCGTGGGCCCCTTCTTGTTCAGGATGTGGTTTTCACTGATGAAATGGCTCATTTTGACCGAGAGAGAATTCCTGAGAGAGTTGTGCATGCTAAAGGAGCAGGGGCCTTTGGCTACTTTGAGGTCACACATGACATTACCAAATACTCCAAGGCAAAGGTATTTGAGCATATTGGAAAGAAGA…
>STRG.35174.1
AGTTCCCAGCGCCGGGCGGAGCGCCGGACAGAGCCCCGCAGCGCCCCGCGGCCGCGATGGGGCCGAAGCGCCCGAAGCCCCGGAGCCCACAAACTGCCGGGCCCGCCTCGCCGCCGGGACCCGGGTGCCTGGGCTCGGCTTGAAGCGGCGGCGGCGCACCGGCACAGCCGCGGGAGCATGGGCAGGAGGATGCGGGGCGCCGCCGCCACCGCGGGGCTCTGGCTGCTGGCGCTGGGCTCGCTGCTGGCGCTGTGGGGAGGGCTCCTGCCGCCGCGGACCGAGCTGCCCGCCTCCCGGCCGCCCGAAGACCGACTCCCACGGCGCCCGGCCCGGAGCGGCGGCCCCGCGCCCGCGCCTCGCTTCCCTCTGCCCCCGCCCCTGGCGTGGGACGCCCGCGGC…
>STRG.35184.1
GACTTCGGCAAGATGGCTGCCCTGACAGCGGAGCATTTTGCAGCACTCCAGAGCCTGCTCAAGGCCTCCTCGAAAGATGTTGTCAGACAGCTGTGTCAAGAAAGCTTTTCCAGTTCAGCCCTTGGCTTGAAAAAACTCTTGGATGTTACATGTTCCAGCTTGTCTGTGACCCAGGAGGAGGCAGAGGAACTGCTCCAGGCTCTGCACCGCCTCACTAGGCTGGTGGCATTCCGTGACCTGTCCTCTGCCGAGGCAATTCTGGCTCTCTTTCCAGAAAATTTCCACCAAAACCTCAAAAACCTGCTGACAAAGATCATCCTAGAACATGTGTCTACTTGGAGAACCGAAGCCCAGGCAAATCAGATCTCTCTGCCACGCCTGGTCGATCTGGACTGGAGA…
>STRG.35228.1
GTCATCCTCACCGTCACGGCCGGCGCCTCCTCCTGGATTCATTCACTCGCTCTTTTCATTCACGAAGGTAGTGAGGCCTAGTGGAAAGCCATGGAGAGCGCTCTCCCCGCCGCCGGCTTCCTGTACTGGGTCGGCGCGGGCACCGTGGCCTACCTAGCCCTGCGTATTTCGTACTCGCTCTTCACGGCCCTCCGGGTCTGGGGAGTGGGGAATGAGGCGGGGGTCGGCCCGGGGCTCGGAGAATGGGCAGTTGTCACAGGTAGTACTGATGGAATTGGAAAATCATATGCAGAAGAGTTAGCAAAGCATGGAATGAAGGTTGTCCTTATCAGCAGATCAAAGGATAAACTTGACCAGGTTTCCAGTGAAATAAAAGAAAAATTCAAAGTGGAGACAAGA…
>STRG.35253.3
GATCTCCCGGTGCCACCCGTTCCAGGGAGGCTGCTTGGTTTGGGAAGATACTCCCCAGGGGTCTCCCCTTCCCTTGGGGGCGCAGCTGAGGACTGCGAGGTGCGTCCGAGGGCCAGAAAGCTGAGATCGATTCTGAGTTCAAGGATCAAGTCTGCCCTCAAACCATTTTACAGATCGGGAAATCCGAGACCCAGAGAAGGGATACTCCCGCCCAAGGGCCACCGAGCCGAGAGAAGCCCGGGCCAGGGCTTTCTTCGCGTATGTGGGAATGCAGGCGCGAGCCCTTTGGGGGGCACAGTCCATACGGGAGCTGAGGCCGAAGCCGGAGCACTAACTGTGCTGTCTAGGGGATCGAGACGGCACTAGAGGGCTGGACTCCTTACTGCCTCAGTTTCCCCA…
>STRG.35666.6
ATCGCTTCTCGGCCTTTTGGCTAAGATCAAGTGTAGTATCTGTTCTTATCAGTTTAATATCTGATACGTCCTCTATCCGAGGACAATATATTAAATGGATTTTTGGAAATAGGAGATGGAATAGGAGCTTGCTCCGTCCACTCCACGCATCGACCTGGTATTGCAGTACTTCCAGGAACGGTGCACTCTCC
>STRG.35697.2
AGTGCGGCGCTGTTTAAAGATGGCGGCGGAGGAACCTCAGCAGCAGAAGCAGGAGCCGCTGGGCAGCGACTCCGAAGGTGTTAACTGTCTGGCCTATGATGAAGCCATCATGGCTCAGCAGGACCGAATTCAGCAAGAGATTGCTGTGCAGAACCCTCTGGTGTCAGAGCGGCTGGAGCTCTCGGTCCTATACAAGGAGTATGCTGAAGATGACAACATCTATCAACAGAAGATCAAGGACCTCCACAAAAAGTACTCGTACATCCGCAAGACCAGGCCTGACGGCAACTGTTTCTATCGGGCTTTCGGATTCTCCCACTTGGAGGCACTGCTGGATGACAGCAAGGAGTTGCAGCGGTTCAAGGCTGTGTCTGCCAAGAGCAAGGAAGACCTGGTGTC…
>STRG.35715.1
AGGCCCGGGTCAGGGGCCTCGAGATCGGGCTTGGGCCCAGAGCATGTTCCAGATCCCAGAGTTTGAGCCGAGTGAGCAGGAAGACTCCAGCTCTGCAGAGAGGGGCCTGGGCCCCAGCCCCGCAGGGGACGGGCCCTCAGGCTCCGGCAAGCATCATCGCCAGGCCCCAGGCCTCCTGTGGGACGCCAGTCACCAGCAGGAGCAGCCAACCAGCAGCAGCCATCATGGAGGCGCTGGGGCTGTGGAGATCCGGAGTCGCCACAGCTCCTACCCCGCGGGGACGGAGGACGACGAAGGGATGGGGGAGGAGCCCAGCCCCTTTCGGGGCCGCTCGCGCTCGGCGCCCCCCAACCTCTGGGCAGCACAGCGCTATGGCCGCGAGCTCCGGAGGATGAGTGA…
>STRG.35763.1
ACCACAAAGCGGTTGGTTGCGGCAGGGACTACACCGGTGTATCATGGGAGCGGCCCGGGCTACACGTTAAAAACACTAAGGGGAGCGCGCGAAGCTGAACTTGGCGCTCGATGGGGGCCGTTAGCCGCCCTAGAGCGCGCGGAGCCGCAGAGGCGTAGCTGGACTACAACGCAGTGCATCTCGGGAGGCCAACTCGACTGGACTGGCCCCCTCATGCCCGGCTGCGAGCTGCCCGTGGGCACCTGCCCGGACATGTGCCCGGCCGCCGAGCGCGCCCAGCGCGAAAGGGAGCACCGCCTGCACCGCTTGGAGGTGGTGCCGGGTTGCCGCCAGGACCCGCCCCGCGCGGATCCGCAGCGCGCGGTGAAGGAGTACAGCCGACCCGCCGCCGGCAAGCCC…
>STRG.35773.5
GTCTGCGTTCCGTGTCCAGGCAGGTGCAGGCGCCGCGGGGCCGGATCCTCCGCGCGGCCGAGTCCATCTCCTGGGAAATGGGGCGGACAGTGTTTCCTTGACTGACTATTGTGAGCGCCCTCTCTCTCCGGCGGAGCGGAGACCATGGCCCCCACTCAGGGCCCCCGGGCCCCGCTGGAATTCGGAGGGCCCCTGGGCGCCGCGGCTCTGCTACTGCTGCTGCCCGCCACCATGTTCCACCTGCTCCTGGCGGCCCGTTCGGGCCCCGCGCGCCTGCTGGGTCCACCCGCGTCCCTGCCGGGGCTGGAGGTGCTGTGGAGCCCACGGGCGCTGCTGCTGTGGCTCGCCTGGCTCGGCCTGCAGGCGGCGCTCTACCTACTGCCGGCGCGCAAGGTGGCC…
>STRG.35850.1
GTTCAGTCGGGTCCCGGCAGCGGCTGCAGCGCTCTCGTCTTCTGCGGCTCTCGGTGCCCTCTCCTTTTCGTTTCCGGAAACATGGCCTCCGGTGTGGCTGTCTCTGATGGTGTCATCAAGGTGTTCAACGACATGAAGGTGCGTAAGTCTTCAACGCCAGAGGAGGTGAAGAAGCGCAAGAAGGCGGTGCTCTTCTGCCTGAGTGAGGACAAGAAGAACATCATCCTGGAGGAGGGCAAGGAGATCCTGGTGGGCGATGTGGGCCAGACTGTCGACGACCCCTACGCCACCTTTGTCAAGATGCTGCCAGATAAGGACTGCCGCTATGCCCTCTATGATGCAACCTATGAGACCAAGGAGAGCAAGAAGGAGGATCTGGTGTTTATCTTCTGGGCCCCC…
>STRG.35858.1
AAAGTTGTTGTTGAGGTGGCGCGGCGCTAAGATGGCGGCGGCGGCGGCGGCGGCCGTGGCGGGGGTGGGGCGCGGTGGCGGTGGCGCGGAGCCACGGCAGGAGCGGAGCCGGGCCCGGGGCTGGGCCGGCGTCGAACGCAGCGAAGGCCGGAGGATGGAACCAGGTGAGGAGCTGGAAGAGGAGGGCTCTCCAGGTGGCCGTGAGGATGGCTTCACCGCCGAGCACCTGGCTGCAGAGGCCATGGCAGCTGACATGGACCCCTGGCTAGTGTTTGATGCCCGCACAACGCCTGCCACTGAGCTGGATGCCTGGCTGGCCAAGTACCCACCATCCCAAGTTACCCGCTATGGGGACCCCGGTTCACCCAACTCAGAGCCTGTGGGCTGGATTGCAGTGTA…
>STRG.35894.1
AGGCTGCGGTAAATCCGGGCTTGCGGCCGCTGGCGTAGTCTGTGGCCGGGTGGTCGTTGCTGCGCGCCCCGAGCCCCGAGAGCCATGCAGATGTCCTACGCCATCCGGTGCGCCTTCTACCAGCTGCTGCTGGCCGCGCTCATGCTGGTGGCGATGCTGCAGCTGCTCTACCTGTCGCTGCTGTCCGGACTGCACGGGCAGGAGGAGCAAGACCAATATTTTGAGTTCTTTCCCCCGTCCCCACGGTCCGTGGACCAGGTCAAGGCGCAGCTCCGCACCGCGCTGGCCTCTGGAGGCGTCCTGGACGCTAGCGGCGATTACCGCGTCTACAGGGGCCTGCTGAAGACCACCATGGACCCCAACGATGTGATCCTGGCCACGCACGCCAGCGTGGACAAC…
>STRG.35921.7
ACTGCTGCGGCCGCCGCCATTTTAGCGTTTTGTCAGAAGCGTCCGCGCCGCGAGGAGGAGGCCCTGCTGGTTTCTGTGCGGGTGAGACTCCGAGCCTTTCCACTGCCTTTCTTGTACTGTGTTAAATCTTCTCTCACTCCCTTGGGCTTCGGGGGTGTCCTGGTAGGTCCGCAGTCTCCACACCCGTCACTGAGAGCCGACCTCGGTCCTCGGCATTGCGCGGCTCTTGTCAGGATGGTGAAGCTGTTCATCGGAAACCTGCCCCGGGAGGCTACAGAGCAGGAGATTCGCTCACTCTTCGAGCAGTATGGGAAGGTGCTGGAATGTGACATCATTAAGAATTACGGCTTTGTGCACATAGAAGACAAGACGGCAGCTGAGGATGCCATACGCAACCTG…
>STRG.35921.9
GTCAGAAGCGTCCGCGCCGCGAGGAGGAGGCCCTGCTGGTTTCTGTGCGGGCTCTTGTCAGGATGGTGAAGCTGTTCATCGGAAACCTGCCCCGGGAGGCTACAGAGCAGGAGATTCGCTCACTCTTCGAGCAGTATGGGAAGGTGCTGGAATGTGACATCATTAAGAATTACGGCTTTGTGCACATAGAAGACAAGACGGCAGCTGAGGATGCCATACGCAACCTGCACCATTACAAGCTTCATGGGGTGAACATCAACGTGGAAGCCAGCAAGAATAAGAGCAAAACCTCAACAAAGTTGCATGTGGGCAACATCAGTCCCACCTGCACCAATAAGGAGCTTCGAGCCAAGTTTGAGGAGTATGGTCCGGTCATCGAATGTGACATCGTGAAAGATT…
>STRG.35959.1
CTCTCTCGGTTTGTCTGGGTCATCTTGTCTGCCCGCCGCTGGCCTGGCCCCGTCTGTCTCTCTCAGCAGCTGTCTTTCTCGCGCCCACTGGCCGGTCTCTCCTCTTCCCCGCAGTTGCCTCCTTCTCTGCCTGCCTGGGTGGCCGCCATGGGCCGGAAGCGGCTCATCACTGATTCCTACCCGGTTGTGAAGAGGAGGGAGGGGCCCGCTGGGCACAGCAAGGGGGAGCTGGCACCCGAGCTAGGGGAGGAGCCCCAGCCCCGCGACGAGGAGGAAGCGGAGCTGGAGCTGCTGAGGCAGTTTGACCTGGCCTGGCAGTACGGGCCCTGCACCGGGATCACACGGCTGCAGCGCTGGTGTCGGGCCAAGCAGATGGGCTTGGAGCCTCCCCCAGAGGTG…
>STRG.35968.1
AGGCCGGAAGGAGGCTGCCGGAGGGCGGGAGGCAGGAGCGGGCCAGGAGCTGCTGGGCTGGAGCGGCGGCGCCGCCATGTCCGACAGCGAGAAGCTCAACCTGGACTCGATCATCGGGCGCCTGCTGGAAGTGCAGGGCTCGCGGCCTGGCAAGAATGTACAGCTGACAGAGAACGAGATCCGCGGTCTGTGCCTGAAATCCCGGGAGATTTTTCTGAGCCAGCCCATTCTTCTGGAGCTGGAGGCACCCCTCAAGATCTGCGGTGACATACACGGCCAGTACTACGACCTTCTGCGACTATTTGAGTATGGCGGTTTCCCTCCCGAGAGCAACTACCTCTTTCTGGGGGACTATGTGGACAGGGGCAAGCAGTCCTTGGAGACCATCTGCCTGCTGCT…
>STRG.35972.1
AGTCAGTGCGCGGCCAGGTACGGGCCGACGGGCCCGCGGGGCCGGCGCCGCCATGGCGGCCGTGTTTGATTTGGATTTGGAGACGGAGGAAGGCAGCGAGGGCGAGGGCGAGCCAGAGCTCAGCCCCGCGGACGCATGTCCCCTTGCCGAGTTGAGGGCAGCTGGCCTAGAGCCTGTGGGACACTATGAAGAGGTGGAGCTGACTGAGACCAGCGTGAACGTTGGCCCAGAGCGCATCGGGCCCCACTGCTTTGAGCTGCTGCGTGTGCTGGGCAAGGGGGGCTATGGCAAGGTGTTCCAGGTGCGAAAGGTGCAAGGCACCAACTTGGGCAAAATATATGCCATGAAAGTCCTAAGGAAGGCCAAAATTGTGCGCAATGCCAAGGACACAGCACACAC…
>STRG.35973.2
ACCCAATCCTGGAGACTCCTGCGGATGCCATTATGAGGAGCAAGAACGCGAAGGGGCCTCGGGTCCGCTAGGCCGGGATCCGGAGCCGCCCGAAGCCGGTGCCGCAGCCCCCTGCGCCCCCGGTGCCCCCGACATGTCCTTCCGCAAAGTGGTCCGGCAGAGCAAATTCCGGCATGTGTTCGGGCAGCCGGTCAAGAACGACCAGTGCTATGAGGACATTCGCGTGTCCCGTGTTACCTGGGACAGCACCTTCTGCGCCGTCAACCCCAAGTTCCTGGCGGTGATTGTGGAGGCCAGTGGAGGGGGTGCCTTTCTGGTGCTCCCCCTAAGCAAGACGGGCCGCATTGACAAGGCCTACCCGACGGTGTGTGGGCACACGGGACCTGTCCTGGACATCGA…
>STRG.35977.1
GACGCTGGGTGTGTGGGCGCAGATGGCGGCGGCGCACGGCGCCTGAGCGGGCCGGGGCCATGAGCGCCGCCCGGCCCCAGTTCAGCATTGATGATGCCTTCGAGCTGTCCCTGGAGGACGGGGGCCCTGGGCCCGAGTCCAGCGGGGTCGCGCGCTTTGGGCCGCTGCACTTCGAGCGTCGGGCCCGGTTCGAGGTGGCTGACGAGGACAAGCAGTCCCGGCTGCGCTACCAGAACCTGGAGAACGATGAGGATGGAGCCCAGGCCTCTCCGGAGCCGGATGGGGGAGTCGGCACCAGGGATTCCAGCCGAACTTCCATCCGCAGCTCCCAGTGGTCCTTCAGCACCATCAGCAGCAGCACCCAGCGCTCCTACAACACCTGCTGCAGCTGGACCCAAC…
>STRG.35978.1
CCCTTTTGGCTTCTGCCCTCAACCAAAATGGCGCTAGCTCGGAAGCTGCCGAGGTGCTAGGAGTTGCCGAAGCAAGTCCGGAAGCTACCGAGCGAGTCCGGAAGTTGCCGAAAGGGAGCAGCGGGGAAGGAGGATGGCGGATATCATCGCAAGACTCCGGGAGGACGGGATCCAAAAACGTGTGATACAGGAAGGCCGAGGAGAGCTCCCGGACTTTCAAGATGGGACCAAGGCCACGTTCCACTACCGGACGCTGCACAGTGACGACGAGGGCACCGTGCTGGACGACAGCCGGGCTCGTGGCAAGCCCATGGAGCTCATCATTGGCAAGAAGTTCAAGCTGCCTGTGTGGGAGACCATCGTGTGCACCATGCGAGAAGGGGAGATTGCCCAGTTCCT…
>STRG.36021.1
GCCTCCCGATTGACTGGCCTGCTTGGCAAGGCAAGTAGCGGCGGCGCTTCAAGATGCGCTGCCTGACCACGCCTATGCTGCTGCGGGCCCTGGCCCAGGCTGCACGTGCAGGACCTCCTGGTGGCCGGAGCCTCCACAGCAGTGCAGTGGCAGCCACCTACAAGTATGTGAACATGCAGGATCCCGAGATGGACATGAAGTCAGTGACTGACCGGGCAGCCCGCACCCTGCTGTGGACTGAGCTCTTCCGAGGCCTGGGCATGACCCTGAGCTACCTGTTCCGGGAACCGGCCACCATCAACTACCCGTTCGAGAAGGGCCCGCTGAGCCCTCGCTTCCGTGGGGAGCATGCGCTGCGCCGGTACCCATCCGGGGAGGAGCGTTGCATTGCCTGCAAGC…
>STRG.35538.1
AGGCCCCGCCCTGCCGCCCCACCGGCCCGCCCGGGCCCTAGTGGGTGGGCGCAGCCTCTGGCGCTTCTTCGGGATCCCAGCTGACCAGCTGGGGGTGGGGCGTGGCGGAGTGGCCACGTGGGCCGCGCGGAGAACGCGCCAGGCTCATCACCTGGATCATCGTGCCTCAGTTTCCCCCTCGGCAAATGGGGCTTCAGCGGCTCGCGACGCACATTGATGGAGCGTATGTCCAGGCGCCGGTGCACCGCAAGGAGCAAAACAGACACAGTTCTTGGTCCTAGGGCTCACGTCCCGGGGCGAAGAGGATCCTCCATAAACGATCAGCCATAGCAGCTGTGATTGGACAAGAGACTGATTTCAGTGACTTTCTCCTAATAAGAGACCACCGACCAGCTGACC…
>STRG.36091.1
AGCGGCCGGCGGGGCCGCAGGCTCGCGCCCGGGCTCGCCCCGCGCCGCTCCAGAGGCTCGCGCACTCAGCAGGTTGGGCTGCGGCGGCGGCGGCAGCTGTGGAAGCTCAGGCGCTGCGCGTGAGAGGTCCCAGATACGTCTGCGGTTCCGGCTCCGCCACCCTCAGCTTCTCTTCCCCAGGTCTGGGAGCCGAGTGCGGAAGGAGGGAACGGCCCTAGCTTTGGGAAGCCAGAGGACACCCCTGGCTCCTGCCGACACCGCCCTCCTTCCCTTCCCAGCCGCGGGCCTCGCTCGGTGCTAGGCTACTCTGCCGGGAGGCGGCGGCGGCTGCCAGTCTGTGGAGAGTCCTGCTGCCCTCCAGCCGGGCTCCTCCACCGGGCCTTGCAGGGGCCGAGAGAG…
>STRG.36368.1
GTCCCGCCCCCTTGAGCTGCGATACGCCGAGCGCTCAACATCCGAGGACTTTGGCCCAGAGTAACCCCGCTCTCGTGACCTTTCCCCTCCATTCCGCACCTCCGAGTGCTGGCCGGGCGAGAGGCTGGCGGCTGGGCTCTCGCGCCCCTCCCTGCAGGGCTCAGGCTCTCCCCCTCCTGTCTTCTCCGCGCTGTTCCTCGTCATGGCGGCCCTCAGCAAGTCCATCCCTCATAACTGCTATGAGATCGGCCACACTTGGCACCCTTCCTGCCGGGTCTCCTTCCTGCAGATCACCGGGGGCGCCCTGGAGGAGTCCCTGAAGATCTATGCTCCTCTGTACTTGATTGCAGCAATTCTCCGGAAACGGAAATTAGACTATTATTTACACAAACTACTCCC…
>STRG.36267.2
ACCGCTAGCCCGCAGCGCTCGGCTTCCTGGTAATTCTTCACCTCTTTTCTCAGCTCCCTGCAGCATGGGTGCTGGGCCCTCCTTGCTGCTCGCCGCCCTCCTGCTGCTTCTCTCCGGCGACGGCGCCGTGCGCTGCGACACACCTGCCAACTGCACCTATCTTGACCTGCTGGGCACCTGGGTCTTCCAGGTGGGCTCCAGCGGTTCCCAGCGCGATGTCAACTGCTCGGTTATGGGACCACAAGAAAAAAAAGTAGTGGTGTACCTTCAGAAGCTGGATACAGCATATGATGACCTTGGCAATTCTGGCCATTTCACCATCATTTACAACCAAGGCTTTGAGATTGTGTTGAATGACTACAAGTGGTTTGCCTTTTTTAAGTATAAAGAAGAGGGCAG…
>STRG.36424.1
GTACTTGGTTTCCCCGCATGGTTCCGGAAGAGCGCGGCGCAGCTGGCTGTGAGCGCAGGGCTATCCCGGCGGCCGCTTCGGCAGCCAGGGCGGCGCGGAGGGGCAGGGCCAGAGGGAAGCGCTTTGTTCCGCGCGTGGTTCCCGCGCCTGGGGGTGCGCGGGAGAGGCGCGAATCCGAGTGCCGCGCGCGGCCCGGGGACTTGCACGGGCGTGCGGGGTGGAACCGCAGGAAGCGGAGCTCTCGGGTTCCCGCCCCGCCCCGCCCCGCCGGCGGCGGAGGCAGCGAGCGCGAGAGCCCAGCGGAGTCGCTGGGAGCCTGAGGCACCGAGACACAAAGGCAGGCGGGATGCGGGAGCAGGCAAAGGGAAAGCGAAAGCCGCGCGCCCGGCCGGTGACTGG…
>STRG.36494.2
GCGGGCGTTTGAAATCAGTGCCTTAGAGTAGACCCTAAACCTCATTTTATACCTTCAAGAACCAATTACTTAATGTCTCTTCCGTCTTTTCCGTCCCCGACCCCCTCCCAGACTCCTTCATTCCGGTACTGCGTGGACGGAAAGCCCCGGGTAGCCGACACCACGTCCCCGGCTAGCGGGAGAGAGCGTGGAAAAGGATTACACCAAACTGTTTAAATCCAACGACTCCTGCTTCCATCCTTTCTCCTGAGCTAGAACCAACAAACCTAGAGAGTTGGGCTTCGGAAAAACTAGTGTTTTCATTTAATTGGATATGAAGAAAGAACAAATATGTACGGGGCAACCACGATCTTTACAAAGAACATAAGTTCCAGGAAAGCAGGAACCTTGTCTCTCTTG…
>STRG.36588.1
GCGTCCGCGCCATCAGGCCCGAGATAGCGGCGAGGTCCGCTTTCAGTGTATGGTTTTCCCTGCCAAACGGTTCTGCTTGGTGCCATCCATGGAGGGCGTGCGCTGGGCCTTTTCCTGCGGCACTTGGCTGCCGAGCCGAGCCGAATGGCTGCTGGCAGTGCGATCGATTCAGCCCGAGGAGAAGGAGCGCATTGGCCAGTTCGTCTTTGCCCGGGACGCTAAGGCAGCCATGGCTGGTCGTCTGATGATAAGGAAATTAGTTGCAGAGAAATTGAATATCCCTTGGAATCATATTCGTTTGCAAAGAACTGCAAAAGGAAAACCAGTTCTTGCAAAGGACTCATCGAATCCTTACCCGAATTTCAACTTTAACATCTCTCATCAAGGAGACTATGCAGT…
>STRG.36676.1
GGGTTGGTGGATGACCTTGAGCCCTCAGGAACGAGATGGCGGTTCTCTGGAGGCTGAGTGCCGTTTGCGGTGCCCTAGGAGGCCGAGCTCTGTTGCTTCGAACTCCAGTGGTCAGACCTGCTCATATCTCAGCATTTCTTCAGGACCGACCTATCCCAGAATGGTGTGGAGTGCAGCACATACACTTGTCACCGAGCCACCATTCTGGCTCCAAGGCTGCATCTCTCCACTGGACTAGCGAGAGGGTTGTCAGTGTTTTGCTCCTGGGTCTGCTTCCGGCTGCTTATTTGAATCCTTGCTCTGCGATGGACTATTCCCTGGCTGCAGCCCTCACTCTTCATGGTCACTGGGGCCTTGGACAAGTTGTTACTGACTATGTTCATGGGGATGCCTTGCAGA…
>STRG.36721.4
GTGCATTTCTAACCAGCTATCAGGAAGTTGCTGAATTTAAAATGTTGTCTCTGTGGAGCCAGAAGATAGGCTTTAGATAGTCATAGTGATGTCTTTTTTAAAAAGTCTCTCTCTTTGCCTAGGAAAACCCTTTTGTAACAATGAGACCTTCGGCCAGTATCCTCTTCAGGTAAACGGTTATCGCAACTTAGACGAGTGTTTGGAAGGGGCCATGGTGGAGGGTGATGTTGAGCTTCTTCCCTCCGATCACTCGGTGAAGTATGGACAAGAGCGTTGGTTTACAAAGCTACCTCCAGTGTTGACCTTTGAACTCTCAAGATTTGAGTTTAATCAGTCCCTTGGGCAGCCAGAGAAAATTCACAATAAGCTGGAATTTCCTCAGATTATTTATATGGACAG…
>STRG.36800.2
GTGACTCCTTGATCTTCTTCCTGCGTGGAGAGCCTTCGCGGGTGAGGCTTAACGCGCAGGAGGTCTCACGAGAGTGGAAGCAACTCTCGCGAATTTTAAAATTTATCTTTTTGCCTAGCGACTGACAACAGGCTGGTTGCTTGGCGTGGAATCCTAAAGTGGCCTGGCTTTGAGACTGGAGTGAGACCCCAGCCCTAGGCTGGGGTTCTTTCCATTATAGAGGAGACGGATTCAGAAGGGCTACAGACCAAGGTTGTTGAAAACCAGACATATGATGAGCGTCTAGAGATTAACGACTCCGAAGAGGTTGCAAGTATTTATACTCCAACCCCAAGACACCAAGGACTTCCTCGTTCTGCCCATCTTCCTAACAAGGCTATGGCTGATAACAGCAGTGAT…
>STRG.36833.1
AAGTGACGCGAGGCTCTGCGGAGACCAGGAGTCAGACTGTAGGACGACCTCGGGTCCCACGTGTCCCCGGTACTCGCCGGCCGGAGCCCCCGGCTTCCCGGGGCCGGGGGACCTTAGCGGCACCCACACACAGCCTACTTTCCAAGCGGAGCCATGTCTGGTAACGGCAATGCGGCTGCAACGGCGGAAGAAAACAGCCCAAAGATGAGAGTGATTCGCGTGGGTACCCGCAAGAGCCAGCTTGCTCGCATACAGACGGACAGTGTGGTGGCAACATTGAAAGCCTCGTACCCTGGCCTGCAGTTTGAAATCATTGCTATGTCCACCACAGGGGACAAGATTCTTGATACTGCACTCTCTAAGATTGGAGAGAAAAGCCTGTTTACCAAGGAGCTTGAA…
>STRG.36834.1
AGCAGTTACACTGCGGCGGGCGTCTGTTCTAGTGTTTGAGCCGTCGTGCTTCACCGGTCTACCTCGCTAGCATGTCGGGCCGCGGCAAGACTGGCGGCAAGGCCCGCGCCAAGGCCAAGTCGCGCTCGTCGCGCGCCGGCCTCCAGTTCCCAGTGGGCCGTGTACACCGGCTGCTGCGGAAGGGCCACTACGCCGAGCGCGTTGGCGCCGGCGCGCCAGTGTACCTGGCGGCAGTGCTGGAGTACCTCACCGCTGAGATCCTGGAGCTGGCGGGCAATGCGGCCCGCGACAACAAGAAGACGCGAATCATCCCCCGCCACCTGCAGCTGGCCATCCGCAACGACGAGGAGCTCAACAAGCTGCTGGGCGGCGTGACGATCGCCCAGGGAGGCGTCCTGC…
>STRG.36840.1
GCCTCTCCGGAGATGGTCTGAGGTGGGAGAAGAGCTGAAGAGACCTGGAGCCGACAGACGGGTGAAGGCCATGCCGCCTCCTGGGAAAGTTCCCCGAAAGGAGAATCTGTGGCTACAGTGTGAGTGGGGGTCCTGCTCCTTTGTGTGCTCAACCATGGAAAAGTTCTTTGAGCATGTCACTCAGCACCTGCAGCAGCACCTGCATGGCTCTGGGGAGGAGGAGGAAGAGGAAGAGGAGGATGACCCACTTGAGGAAGAATTCTCCTGCTTGTGGCAGGAATGTGGCTTTTGTTCTCTGGACAGTTCTGCTGACCTCATCCGCCATGTCTACTTCCACTGCTACCACACCAAGCTGAAACAGTGGGGGCTGCAGGCCTTGCAAAGCCAGGCTGACCTTGG…
>STRG.36878.1
GCTGGAGCCCGGGGCCGCGGAGCCGGGCCGGGGCAGCGCCGTCTCCGCCTCGGGGCCGCCGGGGGCGCCCTGCTGAGCGCTACCCACGTGCGTCCGCGCCACCTCGCGGGCGACCCCGCGGCCAAGGCCCCCGGCGGAGCGGCTCCCGGGCGCCCCGAACTAGCCCCCAACTTTGGGCGAAGTTTGCCTGCGCCTCTCCCCGCCCCCACGCGGCGCGCCGGGGCCGCGGACGGCAGCGGCCCCCGGGGATGCGCCTTCCCGGGGTACCCCTGGCGCGCCCTGCGCTGCTGCTGCTGCTGCCGCTGCTCGCGCCGCTGCTGGGAACGGGTGCGCCGGCCGAGCTGCGGGTCCGCGTGCGGCTGCCGGACGGCCAGGTGACCGAGGAGAGCCTGCAGGCGG…
>STRG.36922.1
CTCATTGAACTCGCCTGCAGCTCTTGGGTTTTTTGTGGCTTCCTTCGTTATTGGAGCCAGGCCTACACCCCAGCAACCATGTCCAAGGGACCTGCAGTTGGTATTGATCTTGGCACCACCTACTCTTGTGTGGGTGTTTTCCAGCACGGAAAAGTCGAGATAATTGCCAATGATCAGGGAAACCGAACCACTCCAAGCTATGTCGCCTTTACGGACACTGAACGGTTGATCGGTGATGCCGCAAAGAATCAAGTTGCAATGAACCCCACCAACACAGTTTTTGATGCCAAACGTCTGATTGGACGCAGATTTGATGATGCTGTTGTCCAGTCTGATATGAAACATTGGCCCTTTATGGTGGTGAATGATGCTGGCAGGCCCAAGGTCCAAGTAGAATAC…
>STRG.36993.1
CTTCCTTGTAAGATGGCGGCGCCCAGGTGGAGCGCGTCGGGCCCCTGGATCCGGGGAAACGGCCAAGGTTGCGGGAGTCTCTTCACTCTCGTCTCAAAGCCATTTTGTGCCGCTGCCGCTGCCTCTACGGCCATAAATGCCCAGAGATTAGCGGAGAAGCTCCGAGCCCAGAAACGGGAACAAGACACAAAGAAGGAGCCGGTGTCCACAAACGCTGTTCAGCGGAGAGTGCAAGAAATAGTGCGGTTCACACGGCAGCTGCAGCGAGTCCACCCCAACGTGCTTGCTAAGGCACTGACCCGAGGAATTCTCCACCAGGACAAGAACCTTGTGGTCATCAATAAGCCCTACGGTCTCCCTGTGCATGGTGGCCCTGGGGTCCAGCTCTGCATCACTGAT…
>STRG.36994.3
GCGCCGGCCGGTAGCTGCAGCTGGAGCAGTGGCGTTTGGAGGAGACTCGGATATACCTTCTCAGAAGCTGCACAGGAGGAAAGCAGTGACAAAGAAAGAAGTTGTCATTCTTTGCACGAAACTGGATGGCTTCTACAGGGAGCCAGGCCTCTGATATAGACGAGATTTTTGGATTCTTCAACGATGGCGAACCTCCCACCAAAAAGCCCAGGAAGCTGCTTCCAAGCTTAAAAACTAAGAAGCCTCGAGAACTTGTGCTAGTGATTGGAACAGGCATTAGTGCTGCAGTTGCGCCCCAAGTTCCAGCCCTCAAATCCTGGAAGGGGTTAATTCAGGCCTTACTGGATGCTGCCATTGATTTTGATCTTTTAGAAGATGAGGAGAGCAAAAAGTTTCAGA…
>STRG.37179.1
CCTACCCCAGCTCTCGCGCCGCGTGCAGAGGTGCTCAAGCCTCCTCGCGGTCCGCAGTCAGTGCCGCCGCGCCCGGCCTCCCGCACGCCCCGCAGGTAGCGCCCCCGCCCGCGGCCCAGAGTGCGCTCGCGCCGGCACCAGCTCCCGGATAAACGGCGCGCCGCGCGGAGATGACAGCCGAGGAGATGAAGGCGACCGAGAGCGGGGCGCAGTCGGCGCCGCTGCCCATGGAGGGAGTGGACATCAGCCCCAAACAGGACGAAGGCGTGCTGAAGGTCATCAAGAGAGAGGGCACAGGTACAGAGATGCCCATGATTGGGGACCGAGTCTTTGTCCACTACACTGGCTGGCTATTAGATGGCACAAAGTTTGACTCCAGTCTGGATCGCAAGGACAAAT…
>STRG.37180.2
AAGAGGCTCCCGCTGAACTCCAGCGCCACGCGCTGCACGTAGCTAACTGACCTCATGGCACCTCCAAGAGCAGAGGGAGCGGAGAGGCCCAGTAAATATTCCCTGAACCCCCGTCGCGACAGCCGCCAGAGCGGAAGGCCACCTAAGGCAGCAAGTTACGTCACTGCCTGAACCTCCAATCTCTGCCTCTTCCTCCTTTAACCTTACAGAGGAGGCGGGTCTTCCGGGCTTGGAGGCGGGCTTCCCAACTCTGATGATGCAGAGCTGGAAGAAACCTCAGGAATGCTTTCGATTTTGCAGATGAGGACAGAAGCCCAGGACTTGCCAAAGGAACCTCATGGGAGAGTCTGGATTAGTTCAGAGACCTCACCTTTCCATTTAACTTCTGAGTCTTGGTTT…
>STRG.37282.1
GCCACATGATGATATCAAGGCTGTTGTGATTCAGTTGGTTTGGCTAAGCCCAGGGACCTTTGGCCTGTTAAAGGTCTGTAATCTTGGTGGGCGATACAGAGTTATGTGTGTTCACTGTAAGGGCAGACCAACAAGAACTTTTTCCTACTTTTGAGCTACCTCTTTTTAATAGGGGTGATTCTTCCAGTTGCTGGAGAGAAATTGTGGTAACTGGAGTGAGAGAGTAGGAACAGGGCATGTTCAGGGTATCAGGGCCAAGGGTCCTAAAGGACTTAGCTTGTGTTATGGCCACTGAGAGATGAAACACAGATCTTTGGTAATCTGATGGCT
>STRG.37284.1
GCTCTCTGCTCCTCCTGTTCGACAGTCAGCCGCATCTTCTTTTGCGTCGCCAGCCGAGCCACATCGCTCAGACACCATGGGGAAGGTGAAGGTCGGAGTCAACGGATTTGGTCGTATTGGGCGCCTGGTCACCAGGGCTGCTTTTAACTCTGGTAAAGTGGATATTGTTGCCATCAATGACCCCTTCATTGACCTCAACTACATGGTTTACATGTTCCAATATGATTCCACCCATGGCAAATTCCATGGCACCGTCAAGGCTGAGAACGGGAAGCTTGTCATCAATGGAAATCCCATCACCATCTTCCAGGAGCGAGATCCCTCCAAAATCAAGTGGGGCGATGCTGGCGCTGAGTACGTCGTGGAGTCCACTGGCGTCTTCACCACCATGGAGAAGGC…
>STRG.37303.4
GAAAGGCTTGGAACAGCTGCCGGAGGTGACGGAGCGGCGGCCCCGCCCGGTGCGCTGGAGGTCGAAGCTTCCAGGTAGCGGCCCGCAGAGCCTGACCCAGGGTACGACGAAGCAGTCGGCGGGAGCCCACGGTCGCTGGGCGGTGTCTTTAAGGGAGGGGGCGGAGCCACGTCTCTGGACATCCTGAGCCCAAGTCCCCCACACTCAGTGCAGTGATGAGTGCGGAAGTGAAGGTGACAGGGCAGAACCAGGAGCAATTTCTGCTCCTAGCCAAGTCGGCCAAGGGGGCAGCGCTGGCCACACTCATCCATCAGGTGCTGGAGGCCCCTGGTGTCTACGTGTTTGGAGAACTGCTGGACATGCCCAATGTTAGAGAGCTGGCTGAGAGTGACTTTGCCT…
>STRG.37321.3
GAAACTGGTAACTTCGGGAGTTGAGCCACGAGCTGTTGTGCATCCAGAGGTGGAATTGGGGCCCGGCATTCCCTCCTCGTCCCGGGCTGGCCCTTGCCCCCACCCTGCAACTCCTGGTTGAGATGGGCTCAGCCAAGAGCGTCCCAGTCACACCAGCGCGGCCTCCGCCGCACAACAAGCATCTGGCTCGAGTGGCGGACCCCCGTTCACCTAGTGCTGGCATCCTGCGCACTCCCATCCAGGTGGAGAGCTCTCCACAGCCAGGCCTACCAGCAGGGGAGCAACTGGAGGGTCTTAAACATGCCCAGGACTCAGATCCCCGCTCTCCTACTCTTGGTATTGCACGGACACCTATGAAGACCAGCAGTGGAGACCCCCCAAGCCCACTGGTGAAACAGC…
>STRG.37475.17
CCCTCACATCACACAGCTGCAGAGATGAATAAACAAAGAGGAACCTTCTCAGAAGTGAGTCTGGCCCAGGACCCAAAGCGGCAGCAAAGGAAACCTAAAGGCAATAAAAGCTCCATTTCAGGAACCGAACAGGAAATATTCCAAGTAGAATTAAATCTTCAAAATCCTTCCCTGAATCATCAAGGGATTGATAAAATATATGACTGCCAAGGTTTACTGCCACCTCCAGAGAAGCTCACTGCCGAGGTCCTAGGAATCATTTGCATTGTCCTGATGGCCACTGTGTTAAAAACAATAGTTCTTATTCCTTTCCTGGAGCAGAACAATTTTTCCCCGAATACAAGAACGCAGAAAGCACGTCATTGTGGCCATTGTCCTGAGGAGTGGATTACATATTCC…
>STRG.37704.1
AGTGAGGGTGGCTGCGTGTTTCCGGAAGACGTGGCGGCTCTCGCCTGGGCTGTTTCCCGGCTTCATTTCTCCCGACTCAGCTTCCCACCCTGGGCTTTCCGAGGTGCTGTCGCCGCTGTCCCCACCACTGCAGCCATGATCTCCTTAACGGACACGCAGAAAATTGGAATGGGATTAACAGGATTTGGAGTGTTTTTCCTGTTCTTTGGAATGATTCTCTTTTTTGACAAAGCACTACTGGCTATTGGAAATGTTTTATTTGTAGCCGGCTTGGCTTTTGTAATTGGTTTAGAAAGAACATTCAGATTCTTCTTCCAAAAACATAAAATGAAAGCTACAGGTTTTTTTCTGGGTGGTGTATTTGTAGTCCTTATTGGTTGGCCTTTGATAGGCATGATC…
>STRG.37713.1
ATTATTTTAACTCTTCTCCTTAGGACACGCAGCCCCCAATTTGTCCCTCCGGCCTGGGCGGCCCCTGGTCCCGCGCGCCAGCATGGGAGAGCGAGGGACCTGCCCGCGGCCCGCCGGCGTGTGCAAGGAGGTCCAGCCGCCGCGCCCGCTACCCGGAGTCTGAGGACGGGTGTCCAGGGACGGAGAGGCAGGTGAGAGGGAGGTGGCTAAGCTGGCTATGGTGACAGGACGATGTTGGCCAGAAAGAGTATCATCCCGGAGGAGTATGTGCTGGCGCGCATCGCCGCAGAGAACCTGCGCAAGCCGCGCATCCGAGACCGCCTCCCCAAAGCCCGCTTCATCGCCAAGAGCGGGGCCTGCAACCTGGCGCATAAGAACATCCGTGAGCAAGGACGCTTT…
>STRG.37723.4
GCGGCCGCCCGCGGTCCAGCTCCGACAACAGGAATTTTCTCCGAGAGCGGGCCGGGCTCAGTTCAGCTGCTGTCCAGACCCGGATCGGCAACAGTGCCGCCTCCAGACGTTCTCCTGCCGCTCGCCCGCCCGTCCCAGCGCCCCCAGCCCTCCCGCGAGGGCGCCCCGGGACGGAAGGATCCACCAGTCTGTCGGCGCCCGCCGTTCTCGTGGTCGCCGTCGCCGTCGTCGTGGTGGTAGTCTCCGCCGTCGCCTGGGCCATGGCCAATTACATCCACGTCCCTCCCGGCTCCCCGGAGGTGCCCAAGCTGAACGTCACCGTTCAGGATCAGGAGGAGCATCGCTGCCGGGAGGGGGCCCTGAGCCTCCTGCAACACCTGCGGCCTCACTGGGACCCCC…
>STRG.37775.1
AGGTGCCGGAAGAGGAAACCTCTCGCTGGGGCTAGGAGTTCGGCGGGGCGCGCGCCGGCGGCTGCGGAGCTGGCAGGTGCGAAGCGTCTGCACCTGGCGGGCGATGGCGCCCGATGCGGGCGCCCCGGGATAGCGTGGGCGAGGCTGCGGGGCCCCGGCGCGCACGCCCGCACCTCTCCCCAGCCCTGGCGTGGGCCCAGCCCGGCCCAGGCAGCAATGGGGTTCCTGCAGCTGCTGGTCGTAGCGGTGCTGGCATCCGAACACCGGGTGGCTGGTGCAGCCGAGGTCTTCGGGAATTCCAGCGAGGGTCTTATTGAATTTTCTGTGGGGAAATTTAGATACTTCGAGCTCAATAGGCCCTTTCCAGAGGAAGCTATTTTGCATGATATTTCAAGCAAT…
>STRG.37865.2
AGAACTGCAGGAGACTATCTTTCTAGACAAGGCAGTTGAGGAGGAGGGAGCGCTTGAGGGGGACTGGCCTGGCGTGCACTCCGCACCTCGGGGACATTATTGCGCGTGGAACGGCTGCTTTTGGAAGACTATTGCCCAGAAGAAAAGATGTTTGGTTTTCACAAGCCAAAGATGTACCGAAGTATAGAGGGCTGCTGTATTTGCAGAGCTAAGTCCTCCAGTTCTCGATTCACTGACAGTAAACGCTATGAAAAGGACTTCCAGAGCTGTTTTGGATTGCATGAGACTCGTTCAGGAGACATCTGCAATGCCTGTGTCCTGCTTGTGAAAAGATGGAAGAAGTTGCCAGCAGGATCAAAAAAAAACTGGAATCATGTGGTAGATGCAAGGGCTGGACCC…
>STRG.37902.1
ATTCCCTTCGTGCCGCTACCAAGATGGCGGCGCCCATCTTGCGGTCCTTTTCCTGGGGCCGGTGGTCTGGTACCCTAAATCTCTCAGTATTGTTGCCCTTGGGGCTGCGTAAGGCCCACTCGGGCGCTCAGGGGTTACTGGCAGCGCAGAAGGCTCGAGGTCTGTTCAAGGACTTCTTCCCGGAGACGGGGACGAAAATAGAGCTCCCAGAGCTCTTCGACCGTGGCACGGCGAGTTTTCCCCAAACCATTTACTGTGGCTTCGACCCCACGGCAGACTCGCTTCATGTGGGTCATCTACTTGCGCTGCTGGGCCTGTTTCATTTGCAGCGAGCGGGCCACAACGTGATCGCGCTGGTGGGAGGCGCCACGGCGCGCCTGGGAGACCCGAGCGGCCGTA…
>STRG.37962.1
ATTATCCTCCTTATTGACAAACAGAGCGGTCGCGGCGGCGACTCTCGGCGTGCGGTGATAGCCAAGCCATGGGAGACAAGAAGAGCCCCACCAGGCCGAAGCGGCAGCCGAAGCCGTCCTCGGATGAGGGTTACTGGGACTGTAGCGTCTGCACCTTCCGGAACAGCGCCGAGGCCTTCAAGTGCATGATGTGCGATGTGCGGAAGGGCACCTCCACCCGGAAACCTCGACCTGTCTCCCAGTTGGTTGCACAGCAGGTTACTCAGCAGTTTGTGCCTCCTACACAGTCAAAGAAAGAGAAAAAAGATAAAGTAGAAAAAGAAAAAAGTGAAAAGGAAACAACTAGCAAAAAGAATAGCCATAAGAAAACCAGGCCAAGATTGAAAAATGTGGATCGGA…
>STRG.37992.3
CTTCGCGGCGCTTCCTAGTTCGGCTGGTTCTTCTGTCGCCGGCTTCAGCAGCCCGCGCCCGGGCAGGAATAGAAGATGAACAAACCCATAACACCATCAACATATGTGCGCTGCCTCAATGTTGGACTAATTAGGAAGCTGTCAGATTTTATTGATCCTCAAGAAGGATGGAAGAAGTTAGCTGTAGCTATTAAAAAACCATCTGGTGATGATAGATACAATCAGTTTCACATAAGGAGATTTGAAGCATTACTTCAAACTGGAAAAAGTCCCACTTCTGAATTACTGTTTGACTGGGGCACCACAAATTGCACAGTTGGTGATCTTGTGGATCTTTTGATCCAAAATGAATTTTTTGCTCCTGCGAGTCTTTTGCTCCCAGATGCTGTTCCCAAAACT…
>STRG.38158.1
CCTAAAGCGAGGAAACCAAGCCGGGCGCCTCTTGCAATGGAGACGGTCATTTCTTCAGATAGCTCCCCAGCTGTGGAAAATGAGCATCCTCAAGAGACCCCAGAATCCAACAATAGCGTGTATACTTCCTTCATGAAGTCTCATCGCTGCTATGACCTGATTCCCACAAGCTCCAAATTGGTTGTATTTGATACGTCCCTGCAGGTGAAGAAAGCTTTTTTTGCTTTGGTGACTAACGGTGTACGAGCTGCCCCTTTATGGGATAGTAAGAAGCAAAGTTTTGTGGGCATGCTGACCATCACTGATTTCATCAATATCCTGCACCGCTACTATAAATCAGCCTTGGTACAGATCTATGAGCTAGAAGAACACAAGATAGAAACTTGGAGAGAGGTGTAT…
>STRG.38177.2
GCAGGTTCTCTTACATCGACCGCCTAAGAGTCGCGCTGTAAGAAGCAACAACCTCTCCTCTTCGTCTCCGCCATCAGCTCGGCAGTCGCGAAGCAGCAACCATGCGTGAGTGCATCTCCATCCACGTTGGCCAGGCTGGTGTCCAGATTGGCAATGCCTGCTGGGAGCTCTACTGCCTGGAACACGGCATCCAGCCCGATGGCCAGATGCCAAGTGACAAGACCATTGGGGGAGGAGATGATTCCTTCAACACCTTCTTCAGTGAGACGGGGGCTGGCAAGCATGTGCCCCGGGCAGTGTTTGTAGACTTGGAACCCACAGTCATTGATGAAGTTCGCACTGGCACCTACCGCCAGCTCTTCCACCCTGAGCAACTTATCACAGGCAAAGAAGATGCTG…
>STRG.38213.1
AACCGGAAGTAGACGTACCTCACGGAAGCCGGCTTTGGCCCTGCGGCTGCTACCGTCGCCGCGGAGAAATTGTTGGATCTGGCAGTCTAGGAATGAATCTCCTCTCAGCCTTTAAGCTCACCTGGTCAGAATCCTTGGATGAGCCTGTGGGACCGTTCCTCCTAGCCCGGTGGTTTGGAACCAGTGGCTTTGGGACTGTAAGAGGATGGACAAAGATTCTCAGGGGCTGCTAGATTCATCCCTGATGGCATCAGGCACTGCCAGCCGCTCAGAGGATGAGGAGTCACTGGCAGGGCAGAAGCGAGCCTCCTCCCAGGCCTTGGGCACCATCCCTAAACGGAGAAGCTCCTCCAGGTTCATCAAGAGGAAGAAGTTCGATGATGAGCTGGTGGAGAGCAG…
>STRG.38228.1
AGAGCACATCCGGTGTTAGAAGCGCTGGTAGGCCTTGGAGAGGCGGGTTAGGAAGAGTGGAGACTGCTGCACGGACTCTGGAACCATGAACATATTTGATCGAAAGATCAACTTTGATGCGCTTTTAAAATTTTCTCATATAACCCCGTCAACGCAGCAGCACCTGAAGAAGGTCTATGCAAGTTTTGCCCTTTGTATGTTTGTGGCGGCTGCAGGGGCCTATGTCCATATGGTCACTCATTTCATTCAGGCTGGCCTGCTGTCTGCCTTGGGCTCCCTGATATTGATGATTTGGCTGATGGCAACACCTCATAGCCATGAAACTGAACAGAAAAGACTGGGACTTCTTGCTGGATTTGCATTCCTTACAGGAGTTGGCCTGGGCCCTGCCCTGGAGTT…
>STRG.38242.2
GTTTTCAAACCGGAGCTGTGGGCGCGGCGCTGCTCTGCCGTTGGGTGAGGCGCGGAGCGAAGTGAAGGGTGGCCCAGGTGGGGCCAGGCTGACTGAAAAAGATGGATACTATGATGCTGAATGTGCGGAATCTGTTTGAGCAGCTTGTGCGCCGGGTGGAGATTCTCAGTGAAGGAAATGAAGTCCAATTTATCCAGTTGGCGAAGGACTTTGAGGATTTCCGTAAAAAGTGGCAGAGGACTGACCATGAGCTGGGGAAATACAAGGATCTTTTGATGAAAGCAGAGACTGAGCGAAGTGCTCTGGATGTTAAGCTGAAGCATGCACGTAATCAGGTGGATGTAGAGATCAAACGGAGACAGAGAGCTGAGGCTGACTGCGAAAAGCTGGAACGACAGA…
>STRG.38272.2
ATCTGTTTTTTTCCCTTCTGAGCAATGGAGCTTACCATCTTTATCCTGAGACTGGCCATTTACATCCTGACATTTCCCTTGTACCTGCTGAACTTTCTGGGCTTGTGGAGCTGGATATGCAAAAAATGGTTCCCCTACTTCTTGGTGAGGTTCACTGTGATATACAACGAACAGATGGCAAGCAAGAAGCGGGAGCTCTTCAGTAACCTGCAGGAGTTTGCGGGCCCCTCCGGGAAACTCTCCCTGCTGGAAGTGGGCTGTGGCACGGGGGCCAACTTCAAGTTCTACCCACCTGGGTGCAGGGTGACCTGTATTGACCCCAACCCCAACTTTGAGAAGTTTTTGATCAAGAGCATTGCAGAGAACCGACACCTGCAGTTTGAGCGCTTTGTGGTAGCT…
>STRG.38318.2
ATTCCTGAGAGCTCTCCTCACCAAGAAGCAGCTTCTCCGCTCCTTCTAGGATCTCCGCCTGGTTCGGCCCGCCTGCCTCCACTCCTGCCTCTACCATGTCCATCAGGGTGACCCAGAAGTCCTACAAGGTGTCCACCTCTGGCCCCCGGGCCTTCAGCAGCCGCTCCTACACGAGTGGGCCCGGTTCCCGCATCAGCTCCTCGAGCTTCTCCCGAGTGGGCAGCAGCAACTTTCGCGGTGGCCTGGGCGGCGGCTATGGTGGGGCCAGCGGCATGGGAGGCATCACCGCAGTTACGGTCAACCAGAGCCTGCTGAGCCCCCTTGTCCTGGAGGTGGACCCCAACATCCAGGCCGTGCGCACCCAGGAGAAGGAGCAGATCAAGACCCTCAACAACAAGT…
>STRG.38340.2
ACTTCCGTTGAGTTCCGCCTCGCCGTTTGTCCCTTGCGGTACCCGTCCGCATACGAATCTAGCCCGGGAACCGAGTTGCGGGAGTGCGGTCTGTGCCGTTCCGGCCAGGAGTTTGCCGACTGCAGACGTCCTGCGAACCGGCAAGATGTGCTCTCTGGGGTTGTTCCCTCCTCCACCGCCTCGGGGTCAAGTCACCCTATATGAGCACAATAACGAGCTGGTGACGGGCAGTAGCTATGAGAGCCCGCCCCCCGACTTCCGGGGCCAGTGGATCAATCTTCCTGTCCTACAACTGACAAAGGATCCCCTAAAGACCCCTGGAAGGCTGGACCATGGCACAAGAACTGCCTTCATCCATCACCGGGAGCAAGTGTGGAAGAGATGCATCAACATTTGGCG…
>STRG.38354.1
AGCGTGCCCCGCGGCGGGCCCTACCGGCCGCGACTCCGGGCTTGGCCCCGGCCCTAGCTCGTCGGCTGTGTATTGGGGCGCGTGGAGGCTGCAGTCACGGTGGCGCCCGCGGGGACGGAGGAGGGAATGAGTGAAGAGGAGCAAGGCTCCGGCACTACCACGGGCTGCGGGCTGCCTAGTATAGAGCAAATGCTGGCCGCCAACCCAGGCAAGACCCCGATCAGCCTTCTGCAGGAGTATGGGACCAGAATAGGGAAGACGCCTGTGTACGACCTTCTCAAAGCCGAGGGCCAAGCCCACCAGCCTAATTTCACCTTCCGGGTCACCGTTGGCGACACCAGCTGCACTGGTCAGGGCCCCAGCAAGAAGGCAGCCAAGCACAAGGCAGCTGAGGTGGCC…
>STRG.38391.1
GTGGTCCCTCGTACCAATCGATCGAATTCTAGTCGCAATTCTCTGTCTGTCCCTCGGCTCTGGGGAGAAAGGGGGGGCTGTGGCGTGGGGGCTGAGGAGGGGCTAAGGCGGGAGGGGCGCCTCATCCCTTCACCCTCCCTTTTCGCCATGTGGGGGCCCTGAGCGCCGCCCCAGAAGAGGTCGAGGGAATGTTGTGGGCTGGGGCACACCAGCACGGCAGAAACTGGAGAAAGCGAGAGACGTCGCCAGGGACCCAGGGACCTCTCCCTCCAGTTCCCCGGGCCCGCCCGGCCCTGATGGCCACTCACGCTATAGCGCCCACTCTGTCCTGGGCCATCCCGCGCCAGCAGTGTAGCCCCCAGCCCGGGCGCCTGAATGCTCTCCCTCCGGATCGCTGCT…
>STRG.38408.1
GCGGCTCCACGTCGGCACCAGCTGCGGGGCAAGATGGAGGCGCTGATTTTGGAACCTTCCCTGTATACTGTCAAAGCCATCCTGATTCTGGACAATGATGGAGATCGACTTTTTGCCAAGTACTATGACGACACCTACCCCAGTGTCAAGGAGCAAAAGGCCTTTGAGAAGAACATTTTCAACAAGACCCATCGGACTGACAGTGAAATTGCCCTCTTGGAAGGCCTGACAGTGGTATACAAAAGCAGTATAGATCTCTATTTCTATGTGATTGGCAGCTCCTATGAAAATGAGCTGATGCTTATGGCTGTTCTGAACTGTCTCTTCGACTCATTGAGCCAGATGCTGAGGAAAAATGTAGAAAAGCGAGCACTGCTGGAGAACATGGAGGGGCTGTTC…
>STRG.38503.1
GTCTGAGGCGGCGACGAGTGGTAGGAGTCTTCTTTCCCCTCCTTCCCCTTTCCCTTCCCTTCCCGGGAGAGGCTGGGACCCGGCACCAGGGCAGTACTGTGGCCGCTGCGGCCTCAGCTCCGACTGGGTCAGGTTGCGGAGACTCCAGGCCGCTTCCAGGGCGAGTACTCCTGATTGTGACATCACATTCATCCCCTGGGCGATGGAGCTTGTCACTGGGAAGGAATACTCAGTCGGAGAATAGCCAACAAGATGGGTTACTGGGAGAATCTCTTCAGTGGCACTGAGTGGAGGCATCAGGGGGTTGGAGCCTTGTGAACAGGGAACCTGCCCCCCAACACTTGGAAGGACCTGGGTTTCAGTGATGAGACATGGGGTATGATGTAACCCGTTTCCAGG…
>STRG.38534.1
AGTCTCCACCCGGACTACGCCATGTTGGGGTTTGTGGGTCGGGTGGCCGCTGCTCCGGCCTCCGGGGCCTTGCGGAGACTCACCCCTTCAGCGTCGCTGCCCCCAGCTCAGCTCTTACTGCGGGCCGCTCCGACGGCGGTCCATCCTGTCAGGGACTATGCGGCGCAAACATCTCCTTCGCCAAAAGCAGGCGCCGCCACCGGGCGCATCGTGGCGGTCATTGGCGCAGTGGTGGACGTCCAGTTTGATGAGGGACTACCACCAATTCTAAATGCCCTGGAAGTGCAAGGCAGGGAGACCAGACTGGTTTTGGAGGTGGCCCAGCATTTGGGTGAGAGCACAGTAAGGACTATTGCTATGGATGGTACAGAAGGCTTGGTTAGAGGCCAGAAAGTACTG…
>STRG.38595.1
ATTGGGTTTGGCTGGCCTCGATTTAAAGAGACAGAAGCTGTCGGGGTCCTGGAAGACGGTCCCCAATACCCTCCCCCCAAGTCCTTGGGACCACTTGGGTCCCCAGAGCTGGGGAGATGGTTTGTGGCGGCTTTGCCTGCTCCAAGAATGCGCTTTGCGCTCTCAACGTGGTCTACATGCTGGTGAGCTTGTTGCTCATTGGAGTGGCTGCTTGGGGCAAGGGCCTGGGTCTGGTGTCCAGCATCCACATCATCGGCGGAGTCATTGCTGTGGGAGTCTTCCTTCTCCTTATTGCAGTGGCTGGACTGGTGGGTGCTGTCAACCACCACCAAGTCCTGCTGTTCTTTTACATGATCATCCTTGGTTTGGTCTTCATCTTCCAATTTGTAATCTCTTGCT…
>STRG.38685.1
ACCCTGGAGAGAAAATGGCGGCGGCAGCAGCTTCGGCGCCTCAGCAGCTCTCGGATGAGGAGCTTTTCTCTCAGCTCCGCCGTTACGGCCTGTCTCCCGGACCAGTGACGGAGAGCACCCGCCCGGTCTACCTCAAGAAGCTGAAGAAGCTTCGAGAGGAAGAGCAGCAACAGCACCGGTCAGGGGGCCGCGGCAACAAGACGCGGAACAGTAATAACAATAACACGGCAGCCGCCACGGTCGCAGCCGCGGGACCAGCGGCGGCGGCGGCCGCGGGGATGGGGGTCCGGCCGGTCTCGGGCGACCTCTCCTACTTACGGACTCCTGGGGGCCTGTGCCGAATCTCGGCCTCTGGCCCAGAGAGCCTCCTGGGAGGGCCCGGGGGCGCCTCCGCCGCCC…
>STRG.38818.1
ATGCCCACAGCGGGCGAGGCGCTAGAGGCGGGGGCGCCGGGAGGCGCGGGCTTTGCTCCTGGGGTCTCGGCCTTGGCCGGCTGGACCTGACCCTAGGGCGGCTTGCGCAGCTGTCGGGACGTGACTGCGTTCAGCCGCGTCGGGCGTGCTTCCCAGACTTGCCCAAGTTCGGGTGCCCTAGCTGCCCCTTTGCAGCCGCTGGCCTACCCGGCCCGCGGGTGAGAAGGTTGCGACGGGAGGTGGGTGGAACTCGCCAGCGCCGGGACCGCGGATTGGCTGCCTCGGCTTTCTCTTTTCCCCGTGGGCTCCGGCGTGAGGCGCTGAAGCGGCCGGCAGCCGGCGACCGGCCCTCACCGTCCGCCGGGTTGCGCTCTGCTTTTGCGGTGAGGCGTTGACCAC…
>STRG.38960.1
AGTCGCTCTCGGATACCTGCTCAGCTCCGCACCGCAACTGAAGATCTGCCGCCGCGGAACAGTTGCGTCTCCATCTGGCTACCAACCCACCCAAGCTTTCTTCTCCACCACCACCACCTTCCTTCCTTCCCCCTCCTCCCCCTCCTTTCCGTCTTCCCTCTCCACCCCCGCCCCCAATCTCCTCCTTTTTTTCTCACTACGAGCGGTTGCTGATGCTGAAGCCGAGCGTCACTTCGGCTCCCACGGCAGACATGGCGACATTGACAGTGGTCCAGCCGCTCACCCTGGACAGAGATGTTGCAAGAGCAATTGAATTACTGGAAAAACTACAGGAATCTGGAGAAGTACCAGTGCACAAGCTACAATCCCTCAAAAAAGTGCTTCAGAGTGAGTTTTGTA…
>STRG.38997.1
ATGTTTGCGCCACCTACAGCCTCGGAGGGTGAGCGTCATGGCGGCTTCTTGCCCTCTCCCGGTGACCCCGGACCTGCCCACGCTGCGTGCCAAGTTGCAGGGACTGCTGCAGTTCCTGAGGGATGCCCTGTCCATTTCCAATGCACATACCGTGGATTTCTACACAGAATCCGTGTGGGAGGAGCTGGTCGACTTGCCACCGGAGACAGTGCTGGCTGCGCTGAGGAAGTCAGCGTCGGAGACGGAGGCCCTGCCCTCAGAGACGCGCCCCCTAGTGGAAGCAGAGTGGGAAGCAGGTATGACTGATTTTCCCAAAATATTTTGTGAAACTTCTCAGAAGTTGGTGAGTGTGGAAGCCTTTGCTCTGGCTGCGAAATACTATTCTGTACAAAACTTGGG…
>STRG.39032.1
GCGGAGTGTGCGTGGCCTGAGCCGTGCGGGTGACTGCTTCAGGGCTTCTCCGCGACTGGACCGGGCGCCGCTCGAAAGCACGCCCTCCATTCGCACTGCTTGTTGGGCTCATCATGAAGCGCTTGGGCTCCGTGCAGCGGAAAATGCCGTGTGTGTTTGTGACGGAGGTGAAAGAGGAGCCTTCCTCCAAAAGGGAGCATCAGCCATTTAAAGTTTTGGCAACTGAAACTGTAAGTCACAAGGCATTAGATGCAGATATATACAGTGCAATTCCAACAGAAAAAGTGGATGGAACATGTTGTTATGTTACTACCTATAAAGATCAGCCATACCTTTGGGCTCGACTAGATAGAAAACCCAACAAACAAGCTGAAAAAAGATTTAAAAATTTTCTACATT…
>STRG.39101.2
GGTCGCCGCGGTGCTGCTGCTCAGTGGGAGCGGGTCTTCGCAACTGTCTCCGCGTGGCGCGCGCCTCTAGCCGCCCTTCCCCTGGCGGCTACGGCCGGAGGGAGCGGAGGCGAGCGGGAGTCGGGCTCCATGGAGAGCGGCGGACAACTGGGCAGAGGCGGAGCTTTCATCTCGGCACCCTGGTTCCAGTGACCCGCGCTAGCGTCCCGTCCCGCCCGCGTCGGAGCGGCCGCCGGCCCCGGGACTGACCGGCCTCGCCGCACCTCCCGCACCGACTAGCGCTCCCGGGCGCTCCTGCGCCCGACTCGCCCTCGCCCCCACTCCCCGGCGGGGTGGCGGCGGCCGGGCCCCCACGGCGGCGGCCGGAGCAGCAGCAGCAGCAGCAGGAGCCCGCCTCTA…
>STRG.39205.3
GGGTTGGTGCGAGCTTCCAGCTTGGCCGCAGTTGGTTCGTAGTTCGGCTCTGGGGTCTTTTGTGTCCGGGTCTGGCTTGGCTTTGTGTCCGCGAGTTTTTGTTCCGCTCCGCAGCGCTCTTCCCGGGCAGGAGCCGTGAGGCTCGGAGGCGGCAGCGCGGTCCCCGGCCAGGAGCAAGCGCGCCGGCGTGAGCGGCGGCGGCAAAGGCTGTGGGGAGGGGGCTTCGCAGATCCCCGAGATGCCGGAGTTCCTGGAAGACCCCTCGGTCCTGACAAAAGACAAGTTGAAGAGTGAGTTGGTCGCCAACAATGTGACGCTGCCGGCCGGGGAGCAGCGCAAAGACGTGTACGTCCAGCTCTACCTGCAGCACCTCACGGCTCGCAACCGGCCGCCGCTCCC…
>STRG.39210.4
CTCTGTGAGCCGCAACCTTTCCAAGGGAGTGGTTGTGTGATCGCCATCTTAGGGAAAAGATGTTCTCGTCCGTGGCGCACCTGGCGCGGGCGAACCCCTTCAACACGCCACATCTGCAGCTGGTGCACGATGGTCTCGGGGACCTCCGCAGCAGCTCCCCAGGGCCCACGGGCCAGCCCCGCCGCCCTCGCAACCTGGCAGCCGCCGCCGTGGAAGAGTACAGTTGTGAATTTGGCTCCGCGAAGTATTATGCACTGTGTGGCTTTGGTGGGGTCTTAAGTTGTGGTCTGACACACACTGCTGTGGTTCCCCTGGATTTAGTGAAATGCCGTATGCAGGTGGACCCCCAAAAGTACAAGGGCATATTTAACGGATTCTCAGTTACACTTAAAGAGGATG…
>STRG.39211.1
AACATGCTTCCTTAGATCCACCTTTGTGGATGAATCTTGAACTGAGTTCCACTTGTAAACTTCTTGTTTCTTGTGGTTCCAGTAGTCAAAGAAACATCCAGCAACTTTTTTGGTTGTATAGTCAAAGGTGCTTGAGTCATTGGCATGTAAGAGAAATATACCTGCATGTTAGTCTAACGTTCTGATAGAAATGACATGCATTTATGCTGCCATTTGTTACTATCAGGACTCGACTCGTGTGCGGACATT
>STRG.39272.1
GCCCCACCCGCGAGCCGCAGCCGCGGCCCCACAGCTTCTGGGGCTGGGGCCCCGGCAGCCGGGCAGGCCGGCCTGACCTCGACCTCCGCCGTGCGGGCCCGACCGGTGAGTCCAGCCCGGCAGTCGCAGGACCCGGCCGCCAGCCTCTCCCTCCACCTCTCCCTGCCCCCAGCGCCAGGCGCGGGCTGCGCTCGGTGGCGGCGGCGGGGCCCTCAGGCGGCCATGGCGGCAGGCGCCGGGGCCGGGTCCGCGCCGCGCTGGCTGAGGGCGCTGAGCGAGCCGCTGAGCGCGGCGCAGCTGCGGCGACTGGAGGAGCACCGCTACAGCGCGGCGGGCGTCTCGCTGCTCGAGCCGCCGCTGCAGCTCTACTGGACCTGGCTGCTCCAGTGGATCCCGCTC…
>STRG.39289.1
ACAGCGCGTCGCGGCAGCCCCCAAGGAAGACCAGCCTGCCTCTGGTCGGTTCCTGGCGCTCTGCGTTTCGTGACCTTGTCCAGTAGAAGGCTATTTAATTTTCACAACTGCTTGAATTTTGACATACAAGATGAAGCAAGATGCCTCAAGAAATGCTGCCTACACTGTGGATTGTGAAGATTATGTGCATGTGGTAGAATTTAATCCCTTTGAGAATGGGGATTCAGGAAACCTAATTGCATATGGTGGCAATAATTATGTGGTCATTGGCACGTGTACGTTTCAGGAAGAAGAAGCAGACGTTGAAGGCATTCAGTATAAAACACTTCGAACATTTCACCATGGAGTCAGGGTTGATGGCATAGCTTGGAGCCCAGAGACTAGACTTGATTCATTGCC…
>STRG.39315.1
CCTTCGCAGCCATTTTCTGTCCAACCAAACAGCCGATTGGAGACGGGAGCCAACCAGGGCTGCATTGGAGGTTGAAATCACAAAGATTAGACACCTTTTTAGATAGGTGTTCTTCAGCACCACTGACAACACGGTTCTGACAGTATTTCATGACAATGGATGGTGACAGTTCTACAACAGATGCTTCTCAACTAGGAATCTCTGCAGACTATATTGGAGGAAGTCATTATGTTATACAGCCTCATGATGATACTGAGGACAGCATGAATGATCATGAAGACACAAATGGTTCAAAAGAAAGTTTCAGAGAACAAGATATATATCTTCCAATAGCAAACGTGGCTAGGATAATGAAAAATGCCATACCTCAAACGGGAAAGATTGCAAAAGATGCCAAAG…
>STRG.39364.5
GCGTTTACCTGGAGGCAGCGGCTTGGGCGCGCAGAGCGGCCGCGGCTCCCCCGCACCTGCGGCCATGGATGAGGAGCGCGCCCTCTACATCGTCCGGGCCGGCGAAGCAGGGGCTATCGAGCGGGTCCTGAGGGATTACAGCGACAAGCATAGGGCTACTTTCAAATTTGAATCAACAGATGAAGATAAAAGAAAGAAACTCTGTGAAGGCATATTTAAAGTCCTTATAAAGGACATCCCAACAACATGTCAAGTGTCCTGCCTGGAAGTACTCCGCATTCTCTCCAGAGACAAAAAGGTTTTAGTTCCTGTGACAACTAAGGAAAATATGCAGATACTGCTGCGACTAGCCAAGCTAAATGAGTTAGATGATTCTTTGGAGAAAGTATCAGAGTTCCC…
>STRG.39520.1
GAGACCCTAGCTCTGCTCTCGGTCCGCTCGCTGTCCGCTAGCCCGCTGCGATGTTGCGCGCTGCCGCCCGCTTCGGGCCCCGCCTGGGCCGCCGCCTCTTGTCAGCCGCCGCCACCCAGGCCGTGCCTGCCCCCAACCAGCAGCCCGAGGTCTTCTGCAACCAGATTTTCATAAACAATGAATGGCACGATGCCGTCAGCAGGAAAACATTCCCCACCGTCAATCCGTCCACTGGAGAGGTCATCTGTCAGGTAGCTGAAGGGGACAAGGAAGATGTGGACAAGGCAGTGAAGGCCGCCCGGGCCGCCTTCCAGCTGGGCTCACCTTGGCGCCGCATGGACGCATCACACAGGGGCCGGCTGCTGAACCGCCTGGCCGATCTGATCGAGCGGGACCGGA…
>STRG.39548.1
GGATGTGAGGGCAATCTGGCTGCGACATCTGTCACCCCATTGATCGCTGGGGTTGATTCGGCTGATCTGGCTGGCTAGGCAGGTGTGCCCTTCCTCCCTCACCGCTCCATGTGCGTCCCTCCCGAAGCTGCGCGCTCGGTCGAAGAGGACGACCATCCCCGATAGAGGAGGACCGGTCTTCGGTCAAGGGTATACGAGTAGCTGCGCTCCCCTGCTAGAACCTCCAAACAAGATGTCAATTGATTACATAAAACTGTGAAATAACTTTTATCACTAAAAAGGCATTAAAAAAAAATTGAGACAGGGTCTCAATATGTT
>STRG.39640.1
AAGCAGCTGATGGCCTCTCCGGGCGGCGGCGGCGGCCTGGCCGGGGCGGGCGGCGCGGGGGCGGCATGAGGGCCCGCGGCCCGGGGGGCTGAGGCGCCCGCCGCCTGCCGCGGGGGCCGCTCGCGTCCTCCATGGAGGCCGGAGAGGAACCGCTGCTGCTGGCCGAACTCAAGCCCGGGCGCCCCCACCAGTTTGATTGGAAGTCCAGCTGTGAAACCTGGAGCGTCGCCTTCTCCCCAGATGGCTCCTGGTTTGCTTGGTCTCAAGGACACTGCATCGTCAAACTGATCCCCTGGCCGTTGGAGGAGCAGTTCATCCCTAAAGGGTTTGAAGCCAAAAGCCGAAGTAGCAAAAATGAGACGAAAGGGCGGGGCAGCCCAAAAGAGAAGACGCTGGACT…
>STRG.39705.5
GTCTGACGGGCGATGGCGCAGCCAATAGACAGGAGCGCTATCCGCGGTTTCTGATTGGCTACTTTGTTCGCATTATAAAAGGCACGCGCGGGCGCGAGGCCCTTCTCTCGCCAGGCGTCCTCGTGGAAGGCCCGGGACCGCGGGATGGGTGTCGGCGTGACCAGGCCTGAGCTCCCTGTCTCTCCTCAGTGACATCGTCTTTAAACCCTGCGTGGCAATCCCTGACGCACCGCCGTGATGCCCAGGGAAGACAGGGCGACCTGGAAGTCCAACTACTTCCTTAAGATCATCCAACTATTGGATGATTATCCGAAATGTTTCATTGTGGGAGCAGACAATGTGGGCTCCAAGCAGATGCAGCAGATCCGCATGTCCCTTCGCGGGAAGGCTGTGGTGCTG…
>STRG.39729.1
ACGCGCGGGCGCACTGCGGGGGCCAAGGAAGGAAGAAATGTGGTCGCGGTTGGTGTGGCTGGGCCTTCGGGCCCCTCTGGGCGGGCGCCAGGGCTTCACCTCCAAGGCGGATCCTCAGGGCAGTGGCCGGATCACGGCTGCGGTGATCGAGCACCTGGAGCGTCTAGCGCTTGTGGACTTCGGCAGCCGCGAGGCAGTGGCGCGACTGGAGAAAGCTATCGCCTTCGCCGACCGGCTACGCGCCGTGGACACAGACGGGGTGGAGCCCATGGAATCGGTCCTGGAGGACAGATGTCTATACCTGAGATCCGACAATGTGGTAGAAGGCAACTGTGCTGATGAATTACTACAAAACTCCCATCGCGTCGTGGAGGAGTACTTTGTGGCCCCCCCAGGTAA…
>STRG.39750.1
ACTCCGGAACAGCGCGCTCGCAGCGGGAGGTCGCGAAGCCTGGGACTGTGTCTGTCGCCCATGGCCGCCGCGCTGCTCGCCCGGGCCTCGGGCCCTGCCCGCAGAGCTCTCTGTCCTAGGGCCTGGCGGCAGTTACACACCATCTACCAGTCTGTGGAACTGCCCGAGACACACCAGATGTTGCTCCAGACATGCCGGGACTTTGCCGAGAAGGAGTTGTTTCCCATTGCAGCCCAGGTGGATAAGGAACATCTCTTCCCAGCGGCTCAGGTGAAGAAGATGGGCGGGCTTGGGCTTCTGGCCATGGACGTGCCCGAGGAGCTTGGCGGTGCTGGCCTCGATTACCTGGCCTACGCCATCGCCATGGAGGAGATCAGCCGTGGCTGCGCCTCCACCGGA…
>STRG.39765.2
AGACCGACTAGGGGACTGGGAGCGGGCGGCGCGGCCATGGCGGGCTGCTGCGCCGCGCTGGCGGCCTTCCTGTTCGAGTACGACACGCCGCGCATCGTGCTCATCCGCAGCCGCAAAGTGGGGCTCATGAACCGCGCCGTGCAACTGCTCATCCTGGCCTACGTCATCGGGTGGGTGTTTGTGTGGGAAAAGGGCTACCAGGAAACTGACTCCGTGGTCAGCTCCGTTACGACCAAGGTCAAGGGCGTGGCTGTGACCAACACTTCTAAACTTGGATTCCGGATCTGGGATGTGGCGGATTATGTGATACCAGCTCAGGAGGAAAACTCCCTCTTCGTCATGACCAACGTGATCCTCACCATGAACCAGACACAGGGCCTGTGCCCCGAGATTCCAGAT…
>STRG.39769.1
GGTAGTGTTGTGCCTTGTGGTGACAACTGGCGGCAGCGCGCCGCGGGCCCGAGACTTAGTCTCGGGCCGCCATGGCCAGCGTCCACGAGAGCCTCTACTTCAATCCCATGATGACCAATGGGGTTGTGCACGCCAATGTGTTCGGCATCAAGGACTGGGTGACGCCGTACAAGATCGCGGTGCTGGTGCTGCTGAACGAGATGAGCCGCACAGGCGAGGGCGCCGTCAGCCTCATGGAGCGGCGGAGGCTCAACCAGCTGCTCCTGCCCCTGCTGCAGGGCCCAGATATTACACTGTCAAAACTTTACAAGTTAATTGAAGAGTCTTGTCCACAGCTGGCAAATTCAGTGCAGATCAGAATCAAACTGATGGCTGAAGGCGAGTTGAAGGATATGGAAC…
>STRG.39904.2
ACTTGCTCTGCGCTGAGGTGCTGGGACAGCCATGGTTTCAGACGAAGATGAATTGAATCTTCTGGTTATTGTAGTTGATGCCAACCCAATTTGGTGGGGAAAGCAAGCATTAAAGGAATCTCAGTTCACTTTATCCAAATGCATAGATGCCGTGATGGTGCTGGGAAATTCGCATTTATTCATGAATCGTTCCAACAAACTTGCTGTGATAGCAAGTCACATTCAAGAAAGCCGATTCTTATATCCTGGAAAGAATGGCAGACTTGGAGACTTCTTCGGAGACCCTGGCAACCCTCCTGAATTTAATCCCTCTGGGAGTAAAGATGGAAAATACGAACTTTTAACCTCAGCAAATGAAGTTATTGTTGAAGAGATTAAAGATCTAATGACCAAAAGTGA…
>STRG.39666.2
AGTTCCGTCGCAGCCGGGATTTGGGTCGCAGTTCTTGTTTGTGGATCGCTGTGATCGTCACTTGACAATGCAGATCTTCGTGAAGACTCTGACTGGTAAGACCATCACCCTCGAGGTTGAGCCCAGTGACACCATCGAGAATGTCAAGGCAAAGATCCAAGATAAGGAAGGCATCCCTCCTGACCAGCAGAGGCTGATCTTTGCTGGAAAACAGCTGGAAGATGGGCGCACCCTGTCTGACTACAACATCCAGAAAGAGTCCACCCTGCACCTGGTGCTCCGTCTCAGAGGTGGGATGCAAATCTTCGTGAAGACACTCACTGGCAAGACCATCACCCTTGAGGTCGAGCCCAGTGACACCATCGAGAACGTCAAAGCAAAGATCCAGGACAAGGAAGG…
>STRG.40020.3
GGGCGCCTGCGCGGGCCGGCGCGGGAGCAAGCGGCATGGCGTTCCGGCAGGCGCTGCAGCTGGCGGCCTGCGGGCTGGCCGGGGGCTCGGCCGCCGTGCTCTTCTCGGCCGTGGCGGTAGGGAAGCCGCGCGCAGGCGGGGACGCGGAGCCACGCCCGGCTGAGCCGCCGGCCTGGGCGGGGGGCGCGCGGCCGGGCCCCGGTGTCTGGGACCCCAACTGGGACAGGCGAGAACCACTGTCTCTGATCAACGTGCGGAAGAGGAACGTGGAATCTGGGGAAGAAGAGCTGGCGTCCAAGCTGGACCACTACAAAGCCAAGGCCACGCGGCACATCTTCCTCATCAGGCATTCCCAGTACCACGTGGATGGCTCCCTGGAGAAGGACCGCACTCTGACCC…
>STRG.40107.2
AGAGCTCGCAGCTCCGCCGGCGCCTGGTCCCAGCGCCCGCGGCGCCGCGTCCCCGGCCCAACCATGGCGTCCTCCGCGGCCGGCTGCGTGGTGATCGTTGGCAGTGGAGTCATTGGGCGAAGCTGGGCCATGCTGTTTGCCAGTGGAGGCTTCCAGGTGAAACTCTATGACATTGAGCAACAGCAGATAAGGAACGCCCTGGAAAACATCAGAAAGGAGATGAAGTTGCTGGAGCAGGCAGGTTCTCTGAAAGGCTCCCTGAGTGTGGAAGAGCAGCTGTCACTCATCAGTGGTTGTCCCAATATCCAAGAAGCAGTAGAGGGTGCCATGCACATTCAGGAATGTGTTCCAGAAGATCTAGAACTGAAGAAGAAGATTTTTGCTCAGTTAGATTCCATC…
>STRG.40140.3
TGGGGTGGGGGCGGGGCCTGGCTGGGCGCCGGGACGGGAGGAGTCCCGGCGGCGCCTCGGACTTTTGCTCCCACAAGTCCTGCCTCGGAGGCGGGGGAGCTGGACCAGCAGCCGCCTGGAGCGTCCGAGTCACCGTCGCCGGGGCTCCCGCGCTCCCCAGAACGGTGGGACGCGGGGCTCGGCAGCCGCCAGCGGAACATGGCGCCCTGGACGCTGTGGCGCTGCTGCCAGCGCGTCGTGGGCTGGGTGCCGGTGCTCTTCATCACCTTCGTGGTCGTCTGGTCCTACTACGCGTACGTGGTGGAGCTCTGCGTGTTTACTATTTTTGGAAATGAAGAAAATGGAAAGACCGTTGTTTACCTTGTGGCTTTCCATCTGTTCTTTGTTATGTTTGTATGG…
>STRG.40178.1
GGAAACGCGGAGCGCGCGCTCCCAGCGAAAGCAGCAGGGCAGGGATCTGCGTTGGAGGAAGGGACTGCTCTGGTGCTAGAATGCTGTGCGTCGGAAGGCTGGGCGGCTTGGGAGCCAGAGCAGCAGCTCTGCCGCCCCGCCGGGCGGGCCGGGGAAGCCTCGAAGCCGGGATCCGGGCCCGAAGGGTCAGCACCAGCTGGTCTCCCGTGGGCGCCGCCTTCAATGTCAAGCCCCAGGGCAGCCGCTTGGACCTGTTCGGCGAGCGCCGGGGTCTTTTTGGAGTTCCTGAGCTGAGTGCCCCAGAAGGATTTCATATTGCACAAGAAAAAGCCTTGAGAAAGACAGAATTGCTTGTGGACCGTGCATGTTCCACCCCACCTGGGCCCCAGACCGTGCTGA…
>STRG.40219.1
ACACACGCTCTGTCTGCCTGCCCCGAGTCCCCCGGGAGGCCGCGGGGTTTGGGGAAGTGTTTCTAGGAGACGGCGCTCACCGGCTGCACCTGCGCCGTTGACGCCACCGGGGCCGGCAGACAGACCCGCGGCGCTGGCTGGTGGAGGGAGTTCCCGCTTGCTCTCTGTCGCTGTCACCGCCCTGTTTCTGTAGCCGTATGGTACGCCTGTGAGACCGGCTGCCGGCTGACGTCTCCTTGCGATGGAGCATATCCGGACGACCAAGGTCGAACAAGTAAAATTACTTGACCGATTCAGTACCAGCAACAAGTCATTAACAGGAACACTGTATCTTACGGCTACACATCTATTATTTATCGACTCTCATCAAAAAGAAACCTGGATATTACACCACCATAT…
>STRG.40237.1
GAGGAGGTACCGGCTGTTGTGCGGCTCTGCCCTTCTGTTTGAGTGTATGGGAGAGTGAGTGAGTGAGTGAGTGTGAGCGTGTGTGTGAGAGCGTGAGGCGTGAGTGCGCGTGTGAGAGGACGAGAGCCCGCCTGGCCGCCCCGCCGCTCCCGCCGCAGCAGGAGCAGAACGCGCGGCCGGAGAGAGCGGCGGAGCCGGCGCCCAGGGAGCCCGCGGGGACAAGGGCAGAGACACCGCTCCCCACCCCCAGCCCTCGTCCCTCGGCTCTCCTTCGCCGGGGGATCCTCCCCGTTCCTCCACCCCCGGCCGGCCTCTGCCCCGCCGTCCCCCTGGATGTCCCTGGCGCTTTCGCGGGGCCTCCTCCTGCTCTTGCCGCATCAGTCGGGCTGGTGCTGCGGC…
>STRG.40305.2
AGTCGCACTCAGGCAGCCGCCGCCGCCGCCGCTGCCGCCATGTTGGTTTGAGAGGCGATGACAGGAGGCGGCCGCGGCGTGTGGGACTGAAAAGTGAAGGAGGAGGAGGAGAAACAAAGCTCTGAGAGGAAACCATTCCCGGGCTGAGGAGAAGGAGGACCCGGCCTCTTCCGGGGACCAGCCGAAGTCGGCGTCGCCCGGAGCTCGCGAGGCCGGGGAGGGGAGGGGAAGGGAAGGCGGAGACCGGGGAGGCGGCGGCGGGGAAGGCGGAGGCAGAAGAGGAGTGGCGAGGAGCCGGAGACGATGCGCCCCGACCCCAGCTGCTGTCCGGAGGCGCCCGCGGCCTGAGCCCAGAGGGGCTGTGGAGTGTCCCGGCCGGCCCCGAGCACCCCCGCGCTG…
>STRG.40333.1
GCCTTCCTAGTGGAGACGCGAGTGGGGGAGGAGCAGTCCGAGGGGAACGTGGGTTGAACGTTGCAACTAGGGTGGAGATCAAGCTGGAACAGGAGTTCCGATCGACCCGGTACCAAGAAGGGGAGTGCCCGCGGCAGGGTTCATTGAAAAAATCCTTAGTGATATTGACATGTCTCAAGTGACATAAATTAGCCAATGACTCGGAATGATGGATTCTCCGAAGATTGGAAATGGTTTGCCAGTGATTGGACCAGGGACTGATATAGGGATATCTTCACTCCACATGGTGGGGTATTTGGGAAAAAATTTTGATTCAGCTAAAGTTCCATCAGATGAGTATTGCCCTGCTTGTAGAGAGAAGGGAAAGTTAAAAGCCTTAAAGACTTACCGAATTAGTTT…
>STRG.40373.2
AAGCGTAGGCCCCCGGGAACTCGAGCTGCCATGAGCCTCTGGGTGGACAAGTATCGGCCCTGCTCCTTGGGACGGCTGGACTATCACAAGGAGCAGGCGGCCCAGCTGCGGAACCTGGTGCAGTGTGGTGACTTTCCTCATCTGTTAGTGTACGGACCATCAGGTGCTGGAAAAAAGACAAGAATTATGTGTATTCTACGTGAACTTTATGGTGTTGGAGTGGAAAAATTGAGAATTGAACATCAGACCATCACAACTCCATCTAAAAAAAAAATTGAAATTAGCACCATTGCAAGTAACTACCACCTTGAAGTTAATCCTAGTGATGCTGGAAATAGTGACCGAGTAGTCATTCAGGAGATGTTGAAAACAGTGGCACAATCACAACAACTTGAAACA…
>STRG.40505.1
GCCCTGGGCAGGCCGCCCGCCAGCCGCAGGGGCGCTCCTGAGCTTCGCGGGGCCGCAGTCCGGGATGCCTGCGCGAAGGGAGGGGCGAAGGGCCGGCCGTTGCCGACGTGGGTGTTAAGTGGCCGCCCCAGCCGGCGACCCGGAGCCGAGAGCGGGCGGCGGAGCCTGAGCTGGACGCGGCCACGCCGGCGCGGCGGGATATGTGGTGCCTGTCATAAGCTCCAGAGAGCTGCCTTCCACAAGACCAGCAGAAGAGTGGGCAAACATGAAATCCAATCCTGCTATCCAGGCTGCCATTGACCTCACAGCGGGGGCTGCAGGAGGTACAGCATGTGTACTGACCGGGCAGCCCTTTGACACAATGAAAGTGAAGATGCAGACGTTCCCTGACCTGTACCG…
>STRG.40518.1
AGTAGTTCTCCCGGGCGCCTAGCGGGATCGCCAGCGCGGCAGTGGGGGCTTCCGCGGCTGCAAGCCAGCGGGTCCTGTGAGGGCGAGCGGAGGCGGAGAAAGGGCGCGGGAGTGAGAGAGGGTGAGTCAGCCACTGTCTATGCAATAAAGGGAGGCCTCACCGCGGGATAGGGCTGAATTCAGAAGTGCGGCCCGTGCCGCAGTCTGTTCCAGGACGCGGCTTGTCTTAGCGTCAGCGAGGGAAGGTTGAGGAGGAGCCAGAGCCTGGTCCTGCAGCCTTTCTCGCCGTCAGCGCCCGTCGCCATCTCCACCATGCAGTCCCGGGAAGACGTCCCGCGCTCTCGCCGCCTCGCCAGTCCCCGTGGTGGGAGGCGGCCCAAGAGGATTTCCAAGCCCTCG…
>STRG.40756.3
TCTTTTTAGGCTTTAGTACAGTGACTGTTACATTATAGAGAGCTTGATCTTGATATTTGAGCCTCTACTATGTCTCTTCTGGGTACTTCAACTTTTGTAGGATTAAGCATTAGTTAAAATTTAGTTATAGTGTGAATGTTCTTTGGATTTTAGTAGGACATTCAGTAAATTATTTCTTGCATATACTGGTATACATTCTGCCTACCATTAGAACCCAGAGTGTGTTTAAATTAGTGTCCTAAATTAATTACATTTTTTTTCTGCTGTGTGTTTCTATTAGGTTTCAGAAAAGGGATCCCTAACATCAGAAGAGTTTGCTAAGCTTGTGGGAATGTCTGTCCTCCTAGCCAAAGAAAGGTGTTTTTGGGGAAAAAAATCACAATCTGGACGTGAGAAAGG…
>STRG.40828.1
CTTCTCCCGCCTCCCTCGGCCTTAGCCATGGCGAGTAGCAGCGGTGCTGGGGCGGCGGCGGCGGCCGCGGCGGCGAATCTGAATGCGGTGCGGGAGACCATGGACGTTCTGCTTGAGATTTCAAGAATTTTGAATACTGGCTTAGATATGGAAACTCTGTCTATTTGTGTACGGCTTTGTGAACAAGGAATTAACCCAGAAGCTTTATCATCGGTTATTAAGGAGCTTCGCAAGGCTACTGAAGCACTGAAGGCTGCTGAAAATATGACAAGCTGACTTTCTGGAGAAATTCTGATGAGATATGTCAAGCTCTGCAAGAGGGTTTGAAGATTGCATTGTAGTTGAGAATGTACAATGAAATTACTGCATGCAGCAGTGTAGAAAAATTTTACTTTTTAA…
>STRG.40897.1
AGACTCGCTGTTTGTGGCCCAGGTGCAGGAAGCTTACGCGGTGGCAGCCGCTCGCTGAGGTAGTCTCTCGCGGCGCCGGGGATCCCTGAACACAGACAGCGCGGGACTGAGAAGGAAAGCTTCTTTCTGGGCAGCCAGAGCCGCAAAGGTGGAGCCGCGTTGGCGCCCTCCGCGGGACCAGCGCCTCGGATGCGGGCGGAGCGCGGGGGGCCGCGGCTGCGGGAGCGCGAAGCGGGGGGCCAGGGGCGCCTCATGTGAGAGCCGCGGGACCTGCAGCCGCCGCCGTCCCCGGAGCACGGGGTGGTGTGTGGGGGAAGCCGCCCCCGGCAGCAGGATGAAACGAGGAGGAAGAGATAGTGACCGTAATTCATCAGAAGAAGGAACTGCAGAGAAATCCAA…
>STRG.40905.1
GGGGACTGGAGGGACGCACTGAGCATGTGCAGATCAGCTCGGTGGTGGCTGCCGCGGCCGGAGGCGAGGGCCCGGTGCTGATGCGAACCGCCGGCTCGGCCTCAGCCCGCGCGTGGTCGGCCCCCCAGGCCGGGGCGACAGGGAAGGAGCCGTAGCCTCCCCGTGGCCCGAGGAGCCGGCGCGGCGGCGCGCACTCCCCGGCGGCCGCGGCGCCCTCGGGGCCCACGATGATGGCGGAGCAGGTGAAATGCGCCTCGGCAGGGGTCAGCTCTGGAGCGGGCTCCGGGCCGGTGGTGAACGCGGAGCTGGAGGTGAAGAAGCTGCAGGAGCTGGTGCGCAAGCTGGAGAAGCAGAACGAGCAGCTGCGGAGTCGAGCGGCCAGCGCGGCCGCCGCCCCGC…
>STRG.40931.1
ACTTTTCCATCTCCTCCCACCCAGCTATACCCTCCCACTGGCGGCGCGGATGGCACGCCGGCGGAGCCAGCGAGTCTGCGCGAGCGGTCCGAGCATGCTCAATAGCGCGCGCGGCGCCCCGGAGCTTCTCCGCGGAACCGCGACCAACGCGGAGGTCTCGGCGGCCGCTGCGGGAGCCACAGGAAGTGAAGAGCTTCCGCCGGGAGACCGCGGCTGCAGGAACGGAGGCGGAAGGGGCCCTGCGGCGACGACGTCGTCGACGGGGGTGGCCGTGGGAGCTGAGCACGGAGAAGACTCCCTCTCTCGGAAGCCGGATCCCGAGCCGGGCAGGATGGATCACCACCAGCCGGGGACTGGGCGCTACCAGGTGCTTCTTAATGAAGAGGATAACTCAGAATC…
>STRG.41172.1
ACTGCGGGCCCGCGGCTCGGGCGGCACCAGCGGCTCCCGGTCTCTCTCTCTGCTCGCCCTCAGTCCCACCCGGTGCCTACGGGGCCGCATCGCCGCCCGGCTCGGCCCGGCCCATGCCCAGGGCCGCTGCTCCCTCAGTTGCCGCCGCCGCCGCCGGCGCCCAGGGGGCCGCCGCGGCTGTGAGGTGGGGGCGGCAGCGGGAGGCGGCGGGGCGGGCCGCCGGGGCCGGGGCTGGGGGCGCAGCGCGGCCGGCGTAGGTCTATGTCGCGGGCGGCGGCGGCGGCGGCGGCCGCGGAGGGACGATGCGCGAGTACAAAGTGGTGGTGCTGGGCTCGGGCGGGGTAGGCAAATCCGCCCTGACCGTGCAGTTCGTGACCGGCACCTTCATCGAGAAATACG…
>STRG.41180.2
GCGGCCCGCGAGCGCGCCTCACGGCTCCTGTCTCCCCTCCCTCCTTCTCTCTCACGCCTAGCGCAATGGCGGCGGCCGCGGCGGAGCAGCAACAGTTCTACCTGCTCCTGGGAAACCTGCTCAGCCCCGACAATGTGGTCCGGAAACAGGCAGAGGAAACCTATGAGAATATCCCAGGCCAGTCAAAGATCACATTCCTCTTACAAGCCATCAGAAATACAACAGCTGCTGAAGAGGCTAGACAAATGGCCGCCGTTCTCCTAAGACGTCTCTTGTCCTCTGCATTTGATGAAGTCTATCCAGCACTTCCCTCTGATGTTCAGACTGCCATCAAGAGTGAGCTACTCATGATTATTCAGATGGAAACACAATCTAGCATGAGGAAAAAAGTTTGTGATA…
>STRG.41202.2
AGCGCAACCGGAACTAGCCTTCTGGGGGCCGGCTTCCTTTATCTCTGGCGGCCTTGTAGTCGTCTCCGAGACTCCCCACCCCTCCTTCCCTCTTGACCCCCTAGGTTTGATTGCCCTTTCCCCGAAACAACTATCATGAGCGCGAGGCTGCCGGTGTTGTCTCCACCTCGGTGGCCGCGGCTGTTGCTGCTGTCGCTGCTCCTGCTGGGGGCGGTTCCTGGCCCGCGCCGGAGCGGCGCTTTCTACCTGCCCGGCCTGGCGCCCGTCAACTTCTGCGACGAAGAAAAAAAGAGCGACGAGTGCAAGGCCGAAATAGAACTATTTGTGAACAGACTTGATTCAGTGGAATCAGTTCTTCCTTATGAATACACAGCGTTTGATTTTTGCCAAGCATCAGAA…
>STRG.41226.1
AGAGTTTCCGCACCCGGGAGGGAGATGCGGCCGGGGCTCAGGCTCCTTGCAGTTGTAATTTAGATTCGAGAAGTGGTTTATCCTTTGACTGGAAAAGAAAAGTAGCTGCAGTATTCCCCCAGCACTTGCTGAGAGCATGCCGTATGCCAGGCTGTGAGGCTCGAGAGACAAGCAGTGGAAGAGTTGCGGCCTGTTTCATCTCTGGATTGTAAATCTGAGCCTCCTTCTGGCCCCTGGAAGGGGACAGCATCACCATGGAATGATTCCTAACCAGCATAATGCTGGAGCCGGGAGCCACCAACCTGCAGTTTTCAGAATGGCCGTGTTGGACACTGATTTGGATCACATTCTTCCATCTTCTGTTCTTCCTCCATTCTGGGCTAAGTTAGTAGTGGGATC…
>STRG.41240.1
AAATGATGCTCCAGTGGCAGGAGCAACTCAAGTTCATCATTGTCCTGAGAGAGAGGAGCAGCGCGGTTCTCGGCCGGGACAGCAGAACGCCAGGGGACCCTCACCTGGGCGCGCCGGGGCACGGGCTTTGATTGTCCTGGGGTCGCGGAGACCCGCGCGCCTGCCCTGCACGCCGGGCGGCAACCTTTGCAGTCGCGTTGGCTGCTGCGATCGGCCGGCGGGTCCCTGCCGAAGGCTCGGCTGCTTCTGTCCACCTCTTACACTTCTTCATTTATCGGTGGATCATTTCGAGAGTCCGTCTTGTAAATGTTTGGCACTTTGCTACTTTATTGCTTCTTTCTGGCGACAGTTCCAGCACTCGCCGAGACCGGCGGAGAAAGGCAGCTGAGCCCGGAGAAG…
>STRG.41323.1
GGGTTTTCCACGTTGGACAAGTGCGGCTCGGCGGCCAGCGGAGCGCGCCCCTTCCCGCTGCCCGCTCCGCTCCTCTCTTCTACCCAGCCCAGTGGGCGAGTGGGCAGCGGCGGCCGCGGCGCTGGGCCCTCTCCCGCCGGTGTGTGCGCGCTCGTACGCGCGGCCCCCGGCGCCAGCCCCGCCGCCTGAGAGGGGGCCTGCGCCGCCGGCCGGGGCGTGCGCCCGGGAGCCACCGCCACCGCGGCCCGCGCCCTCAGGCGCTGGGGTCCCCGCGGACCCGGAGGCGGCGGACGGGCTCGGCAGATGTAGCCGCCGGGCCGAAGCAGGAGCCGGCGGGGGGGCGCCGGGAGAGCGAGGGCTTTGCATTTTGCAGTGCTATTTTTTGAGGGGGGCGGGGGG…
>STRG.41393.1
ACTCGGCCCAGGGCAGGGACCCCGCCACGGCCGGGACCGCCCGGCCCGGCCCCAGCCCGCGCCTCTCCGCGCCGCCCCGCGCTCCGCACCGCGCCCTCTCCGCGTCCCCGCCCGCGCGGCCGGACCGGGCAGCCAGAAAAATCATTTTTCTTCTCTGGGAAGGTGAACATTTGTAGCATTGATTTCCCGGATCTGGTAACATGGCAAAAGATGCCGGTCTAATTGAAGCCAACGGAGAACTCAAGGTCTTCATAGACCAGAACCTTAGTCCCGGGAAAGGCGTGGTGTCCCTCGTGGCCGTTCACCCCTCCACCGTCAACCCGCTCGGGAAGCAGCTCTTGCCAAAAACCTTTGGACAGTCCAATGTCAACATTGCCCAGCAAGTGGTAATTGGTACGC…
>STRG.41495.2
GTTTCCGGTTCGCCTCCGGAGCCATGGCGGCGGCACTGAAGTGTCTACTGACATTAGGAAGATGGTGCCCCGGCCTTGGAGTGGCTCCCCAGGCCCGGGCGCTCGCCGCCTTAGTACCCGGAGTGACCCAGGTAGATAACAAGTCCGGTTTCCTGCAGAAGAGGCCTCATCGCCAGCACCCTGGCATCCTAAAGCTGCCGCACGTGCGGCTGCCACAGGCACTGGCTAACGGTGCCCAGTTATTGCTACTTGGGAGCGCTGGGCCCACTATGGAGAATCAGGTGCAAACACTGACCAGTTATCTCTGGAGCAGACATTTGCCTGTAGAGCCAGAGGAGTTGCAAAGACGGGCTAGGCATCTTGAGAAAAAATTCCTGGAAAACCCAGACTTATCTCAGA…
>STRG.41499.3
AAGCCCGAGCCGGGGCGGGCCCGAGTCAAAGGCAAGTGAAGGTGGAAGCGGCCGCGGCGGCAGCAGACCCCAGAGTCAGAAGGAGTGAGAACCCTGACCCCTAATCCCACTGCATCCAGCCAATAGGAGCCCAGCCACCATGGCGGAGCTGCAGGAGGTGCAGATCACAGAGGAGAAGCCACTGTTGCCAGGACAGACGCCTGAGGCGGCCAAGGAGGCTGAGTTAGCTGCCCGAATCCTCCTGGACCAGGGACAGACTCACTCTGTGGAGACACCATACGGCTCTGTCACTTTCACTGTCTATGGCACCCCCAAACCCAAACGCCCAGCGATCCTTACCTACCACGATGTGGGACTCAACTATAAATCTTGCTTCCAGCCACTGTTTCAGTTCGAGGA…
>STRG.41585.8
AGCGCGAGGAGAAAGATGGCGGCGATGGCGGTCGGGGGTGCTGGTGGGAGCCGCGTGTCCAGCGGGAGGGACCTGAATTGCGTCCCCGAAATAGCTGACACACTAGGGGCTGTGGCCAAGCAGGGGTTTGATTTCCTCTGCATGCCTGTCTTCCATCCGCGTTTCAAGAGGGAGTTCATTCAGGAACCTGCTAAGAATCGGCCCGGTCCCCAGACACGATCAGACCTACTGCTGTCAGGAAGGGACTGGAATACGCTAATTGTGGGAAAGCTTTCTCCATGGATTCGTCCAGACTCAAAAGTGGAGAAGATTCGCAGGAACTCCGAGGCGGCCATGTTACAGGAGCTGAATTTTGGTGCATATTTGGGTCTTCCAGCTTTCCTGCTGCCCCTTAATCAG…
>STRG.41647.1
AGTTCCCACTTACTCCTCCCCAGCAAGAGCTAACAGCCCTCCTTGGGTGTGCACTTTCTCCTCCCCTCAGGCACCTCGCGCATTCTCCCGCCTACCTATCAATCATCGTGCTCCGCTGTCCAGTTGGCTGGCCAAGGGGGCGGGGCCGTCGTGTGACGTTTGCAGCCCGCCGGCCAGGAAGCCGCGAGATGCGTGACGAGCGAAGCGCGTGACGGAGGAGCGGTTGGCCAACGCAGTGGCGGCAGTCGGTGTAAACAAGGCCTCGCGCCGCTGCGGGTCCTGCGACCGCTCCTGGCTGGAGGTGACAGGAGGAGCCCCCGCACAGGACCTAAGAATGCTGTGACCAGAAGATGGGATCGCGGAACAGCAGCAGTGCAGGATCCGGGTCCGGAGACCCCT…
>STRG.41657.3
ACCGCGCCGCTGTGGGAGAGACCCCAGCAGGAGCCCAAAGGCAGCTACGGGGGCGCGAAGGCCGCTGGCGCCGCCTCGGCCAGCCCTTCCCGCGCGGTTCCACTGCCTTAAGGATGACAGTCGTAGGGAACCCTCGAAGTTGGAGCTGCCAGTGGTTGCCAATCCTGATACTGTTGCTGGGCACAGGCCATGGGCCAGGGGTGGAAGGCGTGACACACTACAAGGCCGGCGACCCTGTTATTCTGTATGTCAACAAAGTGGGACCCTACCATAACCCTCAGGAAACTTACCACTACTATCAGCTTCCAGTCTGCTGCCCTGAGAAGATACGTCACAAAAGCCTTAGCCTGGGTGAAGTGCTGGATGGGGACCGAATGGCTGAGTCTTTGTATGAGATCC…
>STRG.41754.7
AACACCACTTCAGCTTCTGCCAGACAGATGGAACTCTCCAGCATGAAAATCTGCGCAGCCATTCCAACAAGCAGGGCTCTGCCTGAGGTTGTCCGAAGGATGCCGAGGAAAAGGATATCAGGACTGGAATGGCTCTTACAGCAAGATCCAACGATAGGGCCTTGGGAGATGGAAAAGGAATTAATCTTCTCACCCTGGCGAGTTTTCCTGAAACTACTTATCCTTAGCGTCAGCGCTGTAAGAGGTGGAGCCGCTCAGTCCCGCGGGTGGCTGCAGACAGAAGGTGGGCGAGTCCTGGGACTTAAAAAGTTTTGCAGAAGGTTGAAAAGAGGAGCAGAGGGAGAGTTTTGAGTTTATTTATTTTATTTTCCTTTTTTTTTTTTTGTCTTGTGCCAAGCC…
>STRG.41809.4
AATCGGCGCAGGCCCTTCGTCGTGCCCCGCCTCGTCTGCCCCGCCAGCGCGTCGAGGGAGGGGCCAGCGACACATGGCCTAGTAACTGTCCGGCCGCGGCGCTGGCTTAAGCCATGGCTGAGGGTAGCCGGATTCCTCAGGCCCGGGCGCTCCTACAGCAGTGCCTGCACGCCCGGCTGCAAATTCGCCCAGCCGATGGGGACGTCGCGGCCCAGTGGGTGGAGGTCCAAAGAGGACTGGTGATCTACGTGTGCTTTTTCAAGGGAGCTGATAAAGAACTTCTTCCCAAAATGGTTAATACACTGTTAAATGTGAAATTAAGTGAGACAGAAAATGGCAAGCATGTCTCTATATTGGATCTACCTGGCAACATTCTTATTATCCCTCAAGCTACCCTTG…
>STRG.41821.1
GTCCTCGCTCGCGTCCCCGCTCCCTCCTCCCCTCTGCTTCTCCCTCCCCTCCACTCCCCCATTGGCTTCTACCCCTCCCCCTTCTTCCTCCGCCTCTCCCACCATTGGTTCCCTCCCCTACTCCATTCCTTCTCACCTTTTCCCTTTTACCCATTGGCGTGAGTATTTTTCCTCAGCTTCCCTCTTTCTCCGTATTCTGCTCCTCCTCAGTCCCATCCTCCACGCTTTGGAAGCTACTGCCTTACTGCCCGGAGCGCCGTCGTCCCCGAACCTCCCCTGCTTCTCCCTTTCCTTCTGTTCCGGTTTCTGGTCGTAACTCAAGAGCAAACCACCGTACTGCAAAGGAACCAGATATTGTGCTCGCGGTTCCAAACCGGGCATGGGCACCGAATGCTTCTC…
>STRG.41858.1
GCGCCTGCGCCGGCCCTCGCCTCGGAGCAGCCATGATGGAAGGCCTGGACGACGGCCCGGACTTCCTCTCAGAAGAGGACCGCGGACTTAAAGCAATAAATGTAGATCTTCAAAGTGATGCTGCTCTGCAGGTGGACATTTCTGATGCTCTTAGTGAGCGGGATAAAGTAAAATTCACTGTTCACACAAAGAGTTCATTGCCAAATTTTAAACAAAACGAGTTTTCAGTTGTTCGGCAACATGAGGAATTTATCTGGCTTCATGATTCCTTTGTTGAAAATGAAGACTATGCAGGTTATATCATTCCACCAGCACCACCAAGACCTGATTTTGATGCTTCAAGGGAAAAACTACAGAAGCTTGGTGAAGGAGAAGGGTCAATGACGAAGGAAGAATTCA…
>STRG.41885.1
TGTAGTTTCCGCCGCGTTTATGGCCGCGTTAAGTCTGAGTGCCGCTTTGAGTTGTTGAATGAAGTGAACTTCATTTGTCAGCGTTCGGTTCATGAACTGGAATGTAAGAGGCACCAGAGGATTCCTGCTCTGTCCCCTGGTTTGCGGCTTGCGACGTTGGACATCCCCGGATTGTTGTTTAATAGAGAAAACTCACCTGCCTTCTTGCTTTTAAGTAGCCCCAAAAGCAGAACCTTGATTTGTCTGTAAGGAAGAAACACAAACCTTTTAAAAAGTTCCACTTCGACTCTGCACCGCCGACCCCCAATCTCTTTAATTTTGCCATAGAAGAGGGGTTTTTTCAACATCTCTCTCACTATCTGGTGCTGATCTCACTGCATAATGACTTTCTATTTGTTT…
>STRG.41955.1
GTGGCAGAGGCGGCGCCAGCCATGTTGGCCGGGCGGAGGTCTTCGCTGAGGCCCGGGGCGGGGTGGCGCCACCCCTGATTGCGGTGCCACGGACTGCTCCTGCTGGGCGGAGAGGACAGATTTTGCAAAGCGGAGGCTGCGACGGGTCCTGCAGGGGGACAGTGAGGAAAGGGCCGCCTCGTCTCCGCTCCTGGGGGACCGCAGAAATAAGAATCAAACTCCACAATGACAACCTATTTGGAATTCATTCAACAAAATGAAGAACGAGATGGAGTCCGATTTAGTTGGAATGTTTGGCCATCAAGTCGACTGGAAGCTACAAGAATGGTTGTTCCTGTGGCAGCCCTGTTTACACCACTGAAAGAGAGACCTGACTTACCACCTATTCAATATGAACCT…
>STRG.41975.1
ACCACTTCTCTGTCTCTGCCGACCGGCGCAGGGAGGGCTGCCTTTTCCTTACAGTACGCCTTGAGGCTTCCGGGCCGCTGAAGTTTACGAGCGAGGGCAGTGCAGTTACTCAGTGTGCCGGCCTCGGACGCACGTGAGTAGAGTTTGAGAAGACAGAGGCTGGCTCCCGGCAGGCCACGCCCGCAGAGGCCTTTCCCCCTCTCCACAACTTGTGTTCTACTTGGTTCCGCCGAGACCCACGACGGTTCCGCCCCCTTCTTCCTAGTCATTGATGTTGTTGTTCTTGTCAGTGCCGCAGCCCCGACCGCCGGGAGCTCGAACCCGAGCCGGGGCCGCCCGGGTGGCGCGGTGGCGGCGGCTGCGGCTGCAGCAGCTGCGACGGCTGCGGGGGCTGCTCCG…
>STRG.42115.2
GAGGACCCCGATGGCGGCGCCGGGTGGCGGGAAGGAGGAAGTTTCAAAGCCAGCTTGACGTGGTTGTGGCCGTTGGGCGAGATGAAGCTACACTGTGAGGTGGAGGTGATCAGCCGGCACTTGCCCGCCTTGGGGCTTAGGAACCGGGGCAAGGGCGTCCGAGCCGTGTTGAGCCTCTGTCAGCAGACTTCCAGGAGTCAGCCGCCGGTCCGAGCCTTCCTGCTCATCTCCACCCTGAAGGACAAGCGCGGGACCCGCTATGAGCTAAGGGAGAACATTGAGCAATTCTTCACCAAATTTGTAGATGAGGGGAAAGCCACTGTTCGGTTAAAGGAGCCTCCTGTGGATATCTGTCTAAGTAAGGCCATTTCCAGCAGTTTAAAAGGTTTCCTTTCAGCT…
>STRG.42117.1
GCAGTTGCGGGTTGTCATAACGGTCCCCGCCGGAGTGAGGCGAGGCCGCGTCGCTCAGTTCTGGCCGTCTAGGGCCCCTGTAAGGATGAGAGCGCAGAGGACGCAGGGCCGCTGGAGGCGCAGGTAACGAAGCTAGGGTGCGGTTGGGACCGCGGCTGAGCTTTTTCCGGGACCCGTGGTGCTGAATGGAGAGGACGGAGACGAAGCCGAGCCGCGGCTCCTAGCGGCGGCGCCGATGCTCGAGCTGTAGCTGCCAGGCGAGGATGTGTGGAGCGCAGGCGGCGCGGGGTAAATGAGAGGTCTCGGGCCCCAGGACCCCCGGGGCCCGGGATGAGTTAGCGAGGGCAGCCGCGGGGGCCAGTTCCGACCGTGACAGGCCAAGGCGACGGCCGCCGCCCG…
>STRG.42119.1
GTCACTGTACGCTGCCCAGAAACTCTGAGGCGGATCCCCCAACCCAGTGTCAGACTGATCGCCTTTGGCCCGAGGGCGAGGAGCCACAGGACAGTATGGCCAAAGCGGCGGCCTCCTCGTCGCTGGAGGACTTGGACCTGAGCGGAGAGGAGGTCCAGCGGCTCACCTCCGCCTTCCAGGACCCGGAGTTCCGGCGAATGTTCTCCCAGTACGCCGAGGAGCTCACCGACCCGGAGAACCGGCGGCGCTACGAGGCGGAGATCACCGCGCTAGAGCGTGAGCGCGGGGTGGAAGTGCGGTTCGTGCACCCGGAGCCCGGCCATGTGCTGCGCACCAGCCTGGACGGGGCGCGGCGCTGCTTTGTGAATGTCTGCAGCAACGCGTTGGTGGGCGCGCCCA…
>STRG.42128.1
AGACGGGCTGCAATAGGGAGCCGGCCCGACGCGGACCGCTTCCCTGCAGTGCCCCGAGTCCCGGGCCCGCGCCGCCGCCGCCCGGCTCCGCTCGCGGCCCCTCTGTCTGCAGGCGTGCCCCGGCGGCGGCGGAGAGCCGTCCTCGGCCGAGGAGGCTGGGAAACGCGAGCGCAGGCGGCAGAGAGGCCTCAACGCCGTCCCTTTCGCCACCGCCTTTTCCTTGCCTCGCGCCGCTGTGCATTTCTCTCCTTTTCCTTTGTTTTTTTGGCCCCTCGCGGGTGTGGGCATTGTTGGTTAGCAAAAGTGCAGCCTCAAGATGGCTGATGGCAACGAGGATCTGCGGGCTGACGACTTGCCTGGGCCAGCCTTCGAGAGCTATGAGTCCATGGAGCTTGCCTG…
>STRG.42151.1
GCTAAAGAGCGCGGGTCCTCGGCCGTGGAGGGTCAAGTGGCTTCTTCTGAGCGCTGAGGGAGGGGAGCGTGCGTAGGGGATGGTGCCAGCGCTGCGTTATTTGGTTGGTGCCTGCGGACGGGCCCGCGGGCTTTTCGCCGGTGGCTCCCCTGGGGCGTGCGGGTTCGCGTCTGGGAGGCCAAGACCGCTGTGTGGAGGTAGCCGCAGCGCCAGCACCAGCTCATTTGATATAGTCATCGTTGGTGGCGGAATTGTGGGGCTTGCCTCTGCCAGAGCACTCATCCTGCGACATCCATCACTTTCTATTGGTGTTCTGGAAAAGGAGAAAGATTTAGCTGTTCACCAGACTGGACATAACAGTGGTGTCATACATAGTGGAATTTATTATAAACCTGAGTC…
>STRG.42186.1
AGTGGGAGCTGCGACCGCGCTCCCTGTGAGGTGGGCAAGCGGCGAAATGGCGCCCTCCGGGAGTCTTGCAGTTCCCCTGGCAGTCCTGGTGCTGTTGCTTTGGGGTGCTCCCTGGACGCACGGGCGGCGGAGCAACGTTCGCGTCATCACGGACGAGAACTGGAGAGAACTGCTGGAAGGAGACTGGATGATAGAATTTTATGCCCCGTGGTGCCCTGCTTGTCAAAATCTTCAACCGGAATGGGAAAGTTTTGCTGAATGGGGAGAAGATCTTGAGGTTAATATTGCGAAAGTAGATGTCACAGAGCAGCCAGGACTGAGTGGACGGTTTATCATAACTGCTCTTCCTACTATTTATCATTGTAAAGATGGTGAATTTAGGCGCTATCAGGGTCCAAG…
>STRG.42192.2
GAGGAGTGGGGCAGGCTCGGCGCCGGTAGGAAGAGTCAGAGGGGTGACCAGAGAGCCCAACGCCTGGTGCTCAAGACTTTCTCCGAGCTATGAAACCCACGTAGTCGAACACCGTGATGCTTCTCCTGCAGGGCGTGTGATGAGGAGGCGAGCTTGGCTTTGGAGTGCTGGGAACCTGAGGAATTGCCAAGGACCCAGAGCCCAGCCCTGACCACCAGAGTGCCCAAAACACAATGAACAAATTGAATTTTCATAACAACAGAGTCATGCAAGACCGCCGCAGTGTGTGCATTTTCCTTCCCAACGATGAATCTCTGAACATCATCATAAATGTTAAGATTCTGTGTCACCAGTTGCTGGTCCAGGTTTGTGACCTGCTCAGGCTAAAGGACTGCCACC…
>STRG.42216.2
ATTAGCCGCTCCGGCCACAGGCAGCGCTTCGCCAGCCGAGGAACCGGACGCGGACACCGCCGCCCCGCGAGCCTCCAGCCCCTCGCCTGTTGCCGCGCGAGTCCCGGGCCCGGAGCGCTAGGAGCGCGCGGAAGGAGCCATGGCTCTGGACGGGATAAGGATGCCAGATGGCTGCTACGCGGACGGGACGTGGGAACTGAGTGTCCATGTGACGGACCTGAACCGCGATGTCACCCTGAGAGTGACCGGCGAGGTGCACATTGGAGGCGTGATGCTTAAGCTGGTGGAGAAACTCGATGTAAAAAAAGATTGGTCTGACCATGCTCTCTGGTGGGAAAAGAAGAGAACTTGGCTTCTGAAGACACATTGGACCTTAGATAAGTATGGTATTCAGGCAGA…
>STRG.42085.2
ATTCTTAAAGGCGCCCGAGTGTAGGCGACAGGCCGCTGACGGCCGGAAGGAAAATGAGTGAGTCTTTGGTTGTTTGTGATGTTGCCGAAGATTTAGTGGAAAAGCTGAGAAAGTTTCGTTTTCGCAAAGAAACGAACAACGCTGCTATTATAATGAAGATTGACAAGGATAAACGCCTGGTGGTACTGGATGAGGAGCTTGAGGGCATTTCACCAGATGAACTTAAAGATGAACTACCTGAACGACAACCTCGCTTCATTGTGTATAGTTATAAATATCAACATGATGATGGAAGAGTTTCATATCCTCTGTGCTTTATTTTCTCCAGTCCTGTTGGATGTAAGCCTGAACAACAGATGATGTATGCTGGAAGTAAGAATAAGCTAGTCCAGACAGCTG…
>STRG.42239.2
AGCCTGTGGCCGCTCCCGGCTCGGAGTGTGATCTAAGCAGGTTGCGTACCTTCCTCAGGTGACTCCGGCCACAGCCCATTGTCCGCGGCCACCGGCGGAGTTTAGCCGCAGACCTCGAAGCGCCCCGGGGTCCTTCCCGAACGGCAGCGGCTGCGGCGGGTCCATGGAGAAGGGCCCTGTGCGGGCACCGGCGGAGAAGCCGCGGGGCGCCAGGTGCAGCAATGGGTTCCCCGAGCGGGATCCGCCGCGGCCCGGGCCCAGCAGGCCGGCGGAGAAGCCCCCGCGGCCCGAGGCCAAGAGCGCGCAGCCCGCGGACGGCTGGAAGGGCGAGCGGCCCCGCAGCGAGGAGGATAACGAGCTGAACCTCCCTAACCTGGCAGCCGCCTACTCGTCCATCCT…
>STRG.42480.1
GTCACCCGGCAGACTCCGGAGGGTAGAGCGCTGTGCCGGTTCCGCTGCCGCTGGCCAGGAGCGCGGGGACAGTTCGGGGCTGCGCCGGAGGCCGGCCCGCCTTCCCGGGGGTTCCGTTATCATGTCGCTGAGGCAGCGCCTGGCCCAGCTGGTTGGCCGTCTGCAGGACCCGCAGAAAGTGGCCCGTTTCCAGCGGCTGTGCGGGGTGGAAGCGCCGCCGCGCCGCTCAGCAGACCGGAGGGAGGATGAGAAAGCGGAGGCGCCTCTCGCCGGAGACCCTCGACTGCGAGGGCGGCAGCCAGGGGCGCCTGGAGGCCCCCAGCCTCCCGGGAGCGACCGCAATCAGTGCCCGGCCAAGCCGGACGGCGGCGGCGCCCCCAACGGCGTGCGGAACGGGCT…
>STRG.42573.1
GAGACGGCCAGGGCCGGCGAGCGCAGTGCAGCGCCGCGCGGTGCGGGCGGCCGAGTGGGGGCGTCATGGAGGATGAGCGGAGCTTTTCGGATATCTGCGGCGGCCGCCTGGCGCTGCAGCGCCGCTACTACTCCCCGTCCTGCCGGGAATTCTGCCTCAGCTGCCCTCGGCTCTCGCTGCGTTCGCTCACCGCTGTCACCTGCACGGTGTGGCTGGCGGCCTACGGACTCTTCACCCTCTGCGAGAACAGCATGATCCTCTCTGCTGCCATCTTCATCACCCTCTTAGGTCTGCTTGGTTATCTCCATTTTGTGAAGATTGATCAGGAGACTCTGTTAATCATTGATTCCCTTGGCATTCAGATGACTTCATCTTATGCTTCAGGCAAAGAAAGCACTA…
>STRG.42536.1
GAAGAGATGCCACTTGGCGGCCATGGCAGCTGTAGTATCGGCGACTCCGGGTCAAGGCCCGGTCGAGTGCAGTACCATGGGCAGCACCGGGTATAGGGCAGAGACAGCTTTGTGTCAACTTTGCTGCTGAACCCCTAGGACCCATCGTTAGAGACCTGCAGGACTCCTTTCCTCATCCCAGGCTCGGAGGAGAGTTTGCTGGGACTGGTGGGCTGGTTTCCTGCTCTGGGGGGCGGATCACCTTCGGGGCCGCCTCTTGGAGACAGGGGCGCCTAGGGAACGAACAGGTTCGCTTGAGTCACTTACCCGCCGCCGCCTAAGACATTGTGCCACCCTCAATCCGACAATCGAAGAAATCGATCATTCGCACATTTTCCCCATTGACTTTTCCCATCTCTG…
>STRG.42694.14
ACCTAATCTGGGAGCCTGCAAGTGACAACAGCCTTTGCGGTCCTTAGACAGCTTGGCCTGGAGGAGAACACATGAAAGAAAGAACCTCAAGAGGCTTTGTTTTCTGTGAAACAGTATTTCTATACAGTTGCTCCAATGACAGAGTTACCTGCACCGTTGTCCTACTTCCAGAATGCACAGATGTCTGAGGACAACCACCTGAGCAATACTAATGACAATAGAGAACGGCAGGAGCACAACGACAGACGGAGCCTTGGCCACCCTGAGCCATTATCTAATGGACGACCCCAGGGTAACTCCCGGCAGGTGGTGGAGCAAGATGAGGAAGAAGATGAGGAGCTGACATTGAAATATGGCGCCAAGCATGTGATCATGCTCTTTGTCCCTGTGACTCTCTGC…
>STRG.42754.1
GTGGAGGAAGATGGCTGCCGCCTGGGGGTCGTCCCTAACGGCCGCGACGCAGAGAGCGGTCACTCCCTGGCCGAGGGGCAGGCTCCTCACGGCCTCCCTGGGACCCCAGGCGCGTCGGGAGGCGTCGTCCTCCAGCCCCGAGGCCGGCGAAGGGCAGATCCGCCTCACAGACAGTTGCGTCCAGAGGCTTTTGGAAATCACCGAAGGGTCAGAATTCCTCAGGCTGCAAGTGGAGGGAGGTGGATGCTCCGGATTCCAATACAAATTTTCACTGGATACAGTTATCAACCCCGACGACAGGGTATTTGAACAGGGTGGGGCAAGAGTGGTGGTTGACTCTGATAGCTTGGCCTTCGTGAAAGGGGCCCAGGTGGACTTCAGCCAAGAACTGATCCGAAG…
>STRG.42766.1
GGAAGTGCAAACTGTGTGGTCTGGCAGGTGTGGATTCCGCCGGTGAAGGCTGAAGGCAGCTACCTTAAAGATGCCGGGATCCGCAGCGAAGGGCTCGGAGTTGTCAGAGAGGATCGAGAGCTTCGTGGAGACCCTGAAGCGGGGTGGTGGGCCGCGCAGCTCCGAGGAAATGGCTCGGGAGACCCTAGGGTTGCTGCGCCAGATCATCACGGACCACCGCTGGAGCAACGCGGGGGAGCTGATGGAGCTGATCCGCAGAGAGGGCAGGAGGATGACGGCCGCTCAGCCCTCCGAGACCACCGTGGGCAACATGGTGCGGAGAGTGCTCAAGATTATCCGGGAGGAGTATGGCAGACTCCATGGACGCAGCGACGAGAGTGATCAGCAGGAGTCCCTGCA…
>STRG.42684.2
GCCGCCCGCCACAGCCTGCGGGAGGGACGCTCGGCGGCCGCGACGGGGGGCGCTGGCGGCGGCGGACGCTGCAGCGGCGGCGGGGCTGGCGCCGCGGCGGCTCCCGGGCCGGGACAGGCCTGGGCACCGGGCGGAGCTCCGCGGCCGGGCGGCAGCGGCGCGGAGCGGGCACGGCGCCTGCAGCCGGGCCCCGGCCCCGGGGGCGCCGCCTCCCCCCGCACCTTCTGCACGGCTGGCCTGCCACTCCTCCTGCTATGATGCCTGGGCAGATCCCGGACCCTTCGGTGACCACAGGCTCCCTGCCAGGGCTTGGCCCCCTGACCGGGCTCCCCAGCTCGGCCCTGACTGTGGAGGAGCTGAAATACGCTGACATCCGCAACCTCGGGGCCATGATTGCAC…
>STRG.42914.1
AGTCATGTGACCCACACAATGGCTGAGTGGCTACTCTCGGCTTCCTGGCAACGCCGAGCGAAAGCTATGACTGCGGCCGCGGGTTCGGCGGGCCGCGCCGCGGTGCCCTTGCTGCTGTGTGCGCTGCTGGCGCCCGGCGGCGCGTACGTGCTCGACGACTCCGACGGGCTGGGCCGGGAGTTCGACGGCATCGGCGCGGTCAGCGGCGGCGGGGCAACCTCCCGACTTCTAGTAAATTACCCAGAGCCCTATCGTTCTCAGATATTGGATTATCTCTTTAAGCCGAATTTTGGTGCCTCTTTGCATATTTTAAAAGTGGAAATAGGTGGTGATGGGCAGACAACAGACGGCACTGAGCCCTCCCACATGCATTATGCACTAGATGAGAATTATTTCCGA…
>STRG.42942.1
GGATGTGAGGGCGATCTGGCTGCGACATCTGTCACCCCATTGATCGCCAGGGTTGATTTGGCTGATCTGGCTGGCTAGGCGGGTGTCCCCTTCCTCCCTCACCGCTCCATGTGCGTCCCTCCCGAAGCTGCGCGCTCGGTCGAAGAGGACGACCATCCCCGACAGAGGAGGACCAGTCTTCGGTCAAGGGTATACGAGTAGCTGCGCTCCACTGCTAGAACCTCCAAACAAGCTCTCAAGAAATGAGAACAACACCAAAAGAGAGCATAAGATAAAGGGGGTGTCTCAGTCTGTTTGGGCTGACTGATACCAT
>STRG.42944.2
ATCCGAGGCAAGCGTTGGTTCTGTGCGCCTCAGGAGTATAATGTCTCAGGAAGGCGATTATGGGAGGTGGACCATATCTAGTAGTGATGAAAGTGAGGAAGAAAAGCCAAAACCAGACAAGCCATCTACCTCTTCTCTTCTCTGTGCCAGGCAAGGAGCAGCAAATGAGCCCAGGTACACCTGTTCCGAGGCCCAGAAAGCTGCACACAAGAGGAAAATATCACCTGTGAAATTCAGCAATACAGATTCAGTTTTACCTCCCAAAAGGCAGAAAAGCGGTTCCCAGGAGGACCTCGGCTGGTGTCTGTCCAGCAGTGATGATGAGCTGCAACCAGAAATGCCGCAGAAGCAGGCTGAGAAAGTGGTGATCAAAAAGGAGAAAGACATCTCTGCTCCCAA…
>STRG.43003.4
GACGCTGGCGCCCGCAGCCGAGAAGCCAGAGAGAAAGTTCCCGGGGAGAGCTCGCCCCTGGGAGGGCCGACGTCGAGCCTGCTCGCCGCGAGGGTCTCAGAGACGGCACCCAGGCGCTCCGGGATGGCGCTCCGCGGGACCCTCCGGCCGCTCAAAGTTCGCAGGAGGCGAGAGATGCTGCCGCAGCAAGTCGGCTTCGTGTGCGCGGTGCTGGCCCTGGTGTGCTGTGCGTCCGGCCTCTTCGGCAGCTTGGGGCACAAAACAGCTTCTGCTAGCAAACGTGTCCTGCCAGACACGTGGAGAAATAGAAAGTTGATGGCCCCAGTGAATGGGACACAGACAGCCAAGAACTGCACAGATCCTGCGATTCACGAGTTCCCCACAGATCTGTTCTCCAAT…
>STRG.43062.1
AATCTGTAGTCTTGGAGCCGCACAGGGTTGGTGGTACCCTCGAGCACACCAGACTTGCAGAAAAAGCATACTCCAGAGGAAGCTGAGGCATGCCTGCTCGAGAGCCAGCTGTTCCATGTGCAATTTTCCTCTGATAGTTTCTGGTCACTGTTGCCACGGTGATAATGACTGGGCTATGTCATTATCTATCCGCCAACAGTAAGAGAAGCTTTGCAGTCGAGATATTGTTTAGCAGATGGAGTGTTTTCTGTTGAACACTAAGTACTGCCACAAGT
>STRG.43074.1
AGTCGCCTCCGGAGGAAGGAAGAAGAGGACGCCGGGCGCGCAGCTCGGTGCTGATTATCACAACTGTTTGGTGACCTACTTCACTGACCTGTGAGGATTCCTTCCCTTCAGGTACTGGATTCTTGATCTTTCTGCATCATCAAGAATGGAAACAGACTGTAATCCCATGGAGCTAAGCAGTATGTCAGGATTTGAAGAAGGTTCAGAGCTGAACGGTTTTGAAGGAACTGACATGAAAGACATGAGGCTCGAAGCTGAAGCAGTTGTAAATGATGTTCTCTTTGCTGTTAACAACATGTTTGTCTCGAAAAGCCTGCGGTGTGCGGATGATGTGGCCTATATCAATGTGGAAACAAAGGAAAGAAACAGATATTGCCTAGAACTCACTGAAGCAGGGCT…
>STRG.43149.1
GCCGCCGTGGCTGCCGCAGCCTCTGGGAGTCTGGAAAAGGGGAAGCGAGAGCAAGCGAAAGACTCAGTCCCCGGGCGGCGGCGGCGGCGGCGGCCGCGGGGGCGCGACGGCCGGGGCGGGGGCGCTGCTGCTGCGGGGGCAGGCGGCGGCAGGGGCGGCGGCGGCGGCGGCGGCCCGCTCCAGCCATGCCGAATAAAAACAAGAAGGAGAAAGAATCACCAAAAGCAGGGAAGAGTGGAAAAAGTTCAAAAGAAGGACAAGACACAGTAGAATCAGAGCAAATTTCCGTCAGGAAAAACAGCCTTGTTGCTGTCCCGTCTACAGTATCTGCTAAAATAAAAGTACCAGTCTCTCAGCCCATAGTGAAGAAAGACAAACGGCAAAATTCTTCAAGGTTTA…
>STRG.43149.4
CGGCGGCGGCGGCCCGCTCCAGCCATGCCGAATAAAAACAAGAAGGAGAAAGAATCACCAAAAGCAGGGAAGAGTGGAAAAAGTTCAAAAGAAGGACAAGACACAGTAGAATCAGAGTGCTACTGTCTAAGAGCTGGAGCTACAGAGCTTGAAATTACCACTGAAAACACTGAAATGTTGGGCCCTTCACTGCTTCCTCATAAGGATACCAGAGGCAACCTGGCATATTAAGCTTGACACTTGGCAGATCACTGTGTAAATTGTTTTTCAGGAATACAAGTTGGGACACTTCTGTTCATTTGACCTTTGAGTTGACCCTTAAATTTTATTATTGTTTTTTTTCCCCTCAGTCTTCAGCTCACTGCTTCACTTCTAGTTCCACCCACTTACCAAATATGA…
>STRG.43209.4
GGGGATGGGGCCAGACGCCCCGGTCGCGCGCCCCCCTCCTTCGCGGAGCTGCCCGGTTCGCCAGCCCCCGCGGAAACGCCTCGGAGCGCGGTAGCCATGGGGACCAGGGCGAAGGTTAACCGAGTATTTGAATAGCGAGGAAAAGGGAGGCCGGGGCGAGCCTGGCGTTCGCTCGCGCTCTCTTGCTTAATGGCAAATTGTGGGCGAGCGCTGCGTTTAAGGAAGTGCTGCTTTGAAGTAAGCCATGGTTGCCGAAGCAACGATTAGTTGTAGAGAACAGTTCCCTAGGTTGCCCTTAAAAATGAAGACGAACGGGGGTGTGCCTGAGAAGTTTGCTTATCCAGGCGGGGTGGGCGGCGGAGAGGGCTCGGGTTCGTTCTTCAGCACTTCCAGGATGGC…
>STRG.43284.1
GCTCCTTCCTCAGCGGCGGGAAGCTGGCGGCAGCGGCGGTGGCGGTGGCTGAGCAGAGGACCCGGCGGGCGGCCTCGCGGGTCAGGACACAATGTTTGCACGAGGACTGAAGAGGAAATGTGTTGGCCACGAGGAAGACGTGGAGGGAGCCCTGGCCGGCTTGAAGACAGTGTCCTCATACAGCCTGCAGCGGCAGTCGCTCCTGGACATGTCTCTGGTGAAGTTGCAGCTTTGCCACATGCTTGTGGAGCCCAACCTGTGCCGCTCAGTCCTCATTGCCAACACGGTCCGGCAGATCCAAGAGGAGATGACGCAGGATGGGACGTGGCGCACAGTGGCACCCCAGGCTGCAGAGCGGGCGCCGCTCGACCGCTTGGTCTCCACGGAGATCCTGTGCCG…
>STRG.43305.1
GCAGCGTGACGCACCGGCGCCGCGGCGGGTACGGGCTCGGGCGGGCGGGCGGGCGGGACGGCGCCCCCCGCGGCCGGGCCTGGCCGGGCTGCGCTAGGCTGGGCTCGGGCAGGGTCGCAGGGGCGGGGGTGGCAGGGGAGCGGGTGGCAGCCCCGCGGGTCACAGCGCCGCCGCCGCCCATGCTGCTGCCCCTAGCCTGCCTGCACGGCCGCGTCGCTCAGTGCCTGACCTCCTTGCTTTTGCTTGCAGAGCCGCTCCCGAGGCCCCGGCGCGGCGCGAGGGCGCGGGGCGCGGCGTCCACAGGCGCCGAGGCTGCCCCCGCCGCCCCGCCCGCGAAGATGGCGGCGGAACTCTACGCTCCCGCCAGCGCCGCGGCCGCGGACCTAGCCAACAGCAACG…
>STRG.43320.1
GCGGCCCCGGCAGTGGCGGCAGAGGCTGGGCGGGCGGGCCCGGGAGCGGCGCAGCATCTGCGGGCGGCGGGGTTTCGAGCTCGCCGGGCCGTGTCGCGCCATGCCCGCTGGCTGAGCGCCGCAGGGCCTCGTCCCGCCAGGCGTGGGGGCCGCGCGCGCCCAGGCCGGGGCCCGGCGGCCGACCATGGTGCTGCCGCCCCCGGACCGGCGCCACGTGTGCCTGACCACGCTGGTGATCATGGGCAGCATGGCCGTCATGGACGCGTACCTGGTGGAGCAGAACCAGGGCCCGCGCAAGATCGGCGTGTGCATCATCGTGCTGGTGGGCGACGTGTGCTTCCTGCTGGTGCTGCGCTACGTGGCCGTGTGGGTGGGCGCCGAGGTGCGCACGGCCAAGCG…
>STRG.43409.1
AGCGCGGCGGCGGCGGCGGCGGCGGCAGCAGCAGGAGCAGCCCCGGCTGCGGGTCGCGACGGCGGCGGGGCGCCCCCTCCCCCGTGCCGGGGCGCGGCGGAGGGATGTGGGGCCTTGCGGGAGGAAGGCTTTTCGGCATCTTCTCGGCCCCGGTGCTGGTGGCTGTGGTGTGCTGCGCCCAGAGTGTGAACGATCCCGGGAACATGTCCTTTGTGAAGGAGACGGTGGACAAGCTGTTGAAAGGCTACGACATTCGCCTAAGACCCGACTTCGGGGGTCCCCCGGTCTGCGTGGGGATGAACATCGACATCGCCAGCATCGACATGGTTTCCGAAGTCAACATGGATTATACCTTAACCATGTATTTTCAACAATATTGGAGAGATAAAAGGCTCGCCT…
>STRG.43607.3
AGCTATCCCGGCGGGCCGCGCGCGCGGCCGCGTTTGAATGGCCCTGAGTGGGACTCGGCCCAGAAGCCGAGGGACTCTCTAGGCTGCCGGGCGCTGGTCGTCAGCGCCGAGGCTGGGCTGAGGCGCCGCGGTACCATGAGGCGCCGGTACTTAAGAGATTATGGCATCAGAAACCCACAATGTTAAAAAACGGAACTTTTGTAATAAGATTGAGGATCATTTCATTGATCTTCCTAGAAAAAAGATCTCTAATTTCACTAATAAGAACATGAAGGAGGTTAAGAAATCTCCAAAACAGTTGGCTGCTTACATAAATAGAACAGTTGGACAAACTGTGAAAAGCCCAGATAAACTTCGTAAAGTGATCTATCGCAGAAAGAAAGTTCATCATCCCTTTCC…
>STRG.43805.1
ATTCGAAAGGAAGGCGCCGGCTGCGGGAAGATGGCGGCTCAGCCGCTGCGGCATCGCTCACGTTGTGCAACGCCGCCCCGGGGGGACTTTTGTGGTGGCACTGAGAGGGCGATTGACCAAGCTTCTTTTACGACCTCCATGGAGTGGGATACGCAGGTGGTGAAGGGGTCCTCGCCGCTCGGCCCCGCAGGGCTGGGGGCTGAGGAGCCAGCCGCCGGCCCGCAGCTGCCGTCTTGGCTGCAGCCTGAGAGGTGCGCTGTGTTCCAGTGCGCACAGTGTCACGCAGTGCTCGCCGACTCGGTGCACCTCGCCTGGGACCTGTCGCGGTCCCTCGGGGCCGTGGTCTTCTCCAGAGTTACAAATAACGTCGTTTTGGAAGCGCCCTTCCTAGTTGGCATT…
>STRG.43842.1
GAAATGCTTTCGGTAGGCACTCCACGGCTGTGAAGATGGCGGCGGCTGCGTGGCTTCAGGTGTTGCCTGTCATTCTTCTGCTTCTGGGAGCTCACCCGTCACCACTGTCGTTTTTCAGTGCGGGACCGGCAACCGTAGCTGCTGCCGACCGGTCCAAATGGCACATTCCGATACCGTCGGGGAAAAATTATTTTAGTTTTGGAAAGATCCTCTTCAGAAATACCACTATCTTCCTGAAGTTTGATGGAGAACCTTGTGACCTGTCTTTGAATATAACCTGGTATCTGAAAAGCGCTGATTGTTACAATGAAATCTATAACTTCAAGGCAGAAGAAGTAGAGTTGTATTTGGAAAAACTTAAGGAAAAAAGAGGCTTGTCTGGGAAATATCAAACATCAT…
>STRG.43871.2
ACTTGCGCGGCCAGAGAGGGGCAGGTGCTGGGCGGCGGCTGACGGGCGCAGCACCCTAGGCCCAGTGTCTGGCTCCAGCCCCGCATCCGGCGCCGGCCCCGCATCCAGCTCTGGCCCTGCGACAATAGAGTCCGGAAGTGCAGGCAAAGCGGCTCCCGGGAGCGCCGCGCGGTCCTGCGCGGGATCAGCGAGGGCCGCGCCCCGGCGGGCGGGCGGCATGGCTGCAGTGCTGGCTCTCAGGGTGGTCGCGGGGTTGGCGGCCGCAGCGCTGGTGGCCATGCTCTTGGAGCACTACGGCCTGGCGGGCCAGCCCTCGCCGCTGCCGCGCCCCGCGCCCCCCAGGAGGCCGCACCCTGCGCCAGGGCCCGGAGACAGCAACATCTTCTGGGGCCTGCAGAT…
>STRG.43876.1
CCCTACCGAGGTCCGTGAGGTGTGTGCTAACCAAGGGGCGGCTCACAACCGTGACAGACTGCCATTCCTGAGTCTCTTCTGGCCATGGGCCCCCGGAGCCGTGAGCGTCGGGCAGGCGCGGTACAGAACACCAACGACAGCAGCGCCCTCAGCAAGCGTTCCCTGGCCGCGCGCGGGTACGTGCAGGACCCCTTTGCCGCGTTGCTGGTTCCGGGCGCGGCGCGCCGCGCACCGCTCATTCACCGAGGCTACTACGTCCGCGCACGCGCCGTGAGGCACTGCGTGCGCGCTTTTTTGGAGCAGATTGGCGCGCCCCAGGCCGCGCTTCGCGCGCAGATCTTGTCTCTCGGCGCTGGCTTCGACTCGCTCTATTTTCGCTTAAAAACCGCGGGCCGCCTG…
>STRG.44062.2
AGTCGCGCTGCTGTGGCGGCCGCTGTAGCAGCGGCGGTCCAGTCGTAGCCCGGCCGCCCGCGCCTGTCCGGTCCGGTCCGGCCACGGAGGCAGCGCAGCGGCGGGACTCCGAGCCTACCCCGCCGAGTGAGCTGCGCCGCACCGTGCCGTCCCACCCGGCACCCACCAGTCCGATGGGGCCGCAGCGGCGGCTGTCCCCTGCCGGGGCCGCCCTACTCTGGGGCTTCCTGCTCCAGCTGACAGCCGCTCAGGAAGCAATCTTGCATGCGTCTGGAAATGGCACAACCAAGGACTACTGCATGCTTTATAACCCTTATTGGACAGCTCTTCCAAGTACCCTAGAAAATGCAACTTCCATTAGTTTGATGAATCTGACTTCCACACCACTATGCAACCTTT…
>STRG.44111.1
ATCGCGGAGGGCGGGGCCGCGGGGCGGTGCTCGGGGCCGGGGACGGCTGCTGGAGCGGCGCCCGCCGCGGCTCAGCGCATTCCCGCTCTCCGCTTCCCTCTCCGCTGCGTCCCCGCGCGAAGATGGCAACCGAGGGGCTGCACGAGAACGAGACGCTGGCGTCGCTGAAGAGCGAGGCCGAGAGCCTCAAGGGCAAGCTGGAGGAGGAGCGAGCCAAGCTGCACGATGTGGAGCTGCACCAGGTGGCGGAGCGGGTGGAGGCCCTGGGGCAGTTTGTCATGAAGACCAGAAGGACCCTCAAAGGCCACGGGAACAAAGTCCTGTGCATGGACTGGTGCAAAGATAAGAGGAGGATCGTGAGCTCGTCACAGGATGGGAAGGTGATCGTGTGGGATTCCT…
>STRG.44151.1
CTTCCGCCTTAGGAAGGTGGCGGCCAGGGATGAGGAGGCCCCTAAGCAAGTGCGGAATGGAGCCGGGGGGCGGAGATGCCAGCCTCACTTTGCATGGTCTCCAGAACCGCTCCCACGGCAAGATAAAGCTGCGAAAGAGAAAGTCTACCTTGTACTTCAACACCCAGGAGAAGAGCGCCAGGCGCCGCGGGGATCTTCTTGGAGAAAATATTTATCTGCTCTTGTTTACCATAGCTTTACGAATATTAAACTGCTTTTTAGTGCAGACAAGTTTTGTTCCAGATGAATACTGGCAGTCTCTTGAAGTTTCACATCACATGGTTTTCAATTATGGTTATTTGACTTGGGAATGGACAGAGAGACTGAGGAGTTACACTTATCCCTTAATCTTTGCAAGCA…
>STRG.44202.1
GTTCTTCCGGGAAAATGGCGACTCCCGCTCGTGCCCCGGAGTCACCGCCGTCCGCGGATCCGGCGCTAGTAGCGGGGCCTGCCGAGGAAGCCGAGTGCCCGCCGCCGCGCCAGCCTCAGCCCGCGCAGAATGTGCTCGCTGCCCCGCGGCTTCGAGCCCCAAGCTCCCGAGGACTTGGCGCAGCGGAGTTTGGTGGAGCTGCGGGAAATGTTGAAGCGCCAGGAGAGACTTTTGCGCAACGAAAAATTCATTTGCAAATTGCCCGACAAAGGTAAAAAGATCTTTGACTCTTTTGCCAAACTGAAAGCTGCCATTGCAGAATGTGAAGAAGTTAGAAGAAAAAGTGAACTGTTTAACCCTGTTAGTTTAGACTGTAAGCTAAGGCAAAAAGCAATTGCA…
>STRG.44207.1
GGACCGCGCGCACAGCCCGCACTGCCCCACGCCGCGGGCTAGGGACACCCGGCCCGCCACCATGACTTCCAGCAAGATAGAGATGCCCGGCGAGGTGAAGGCCGACCCCGCCGCCCTCATGGCGTCGCTGCACCTCCTGCCGTCGCCCACGCCCAATCTCGAAATTAAGTACACCAAGATCTTTATAAACAACGAGTGGCAGAACTCAGAGAGTGGGAGAGTGTTCCCTGTCTATAATCCAGCCACAGGAGAACAGGTGTGTGAAGTTCAAGAAGCAGACAAGGCAGATATAGACAAAGCAGTGCAGGCAGCCCGCCTGGCTTTCTCTCTTGGTTCAGTGTGGAGAAGGATGGATGCTTCAGAAAGGGGACGTCTGTTGGATAAGCTTGCAGACTTGGT…
>STRG.44228.1
GAAGATCCCCAGCGCTGCGGGCTCGGAGAGCAGTCCTAACGGCGCCTCGTACGCTAGTGTCCTCCCTTTTCAGTCCGCGTCCCTCCCTGGGCCGGGCTGGCACTCTTGCCTTCCCCGTCCCTCATGGCGCTGCTCCGACGCCCGACGGTGTCCAGTGATTTGGAGAATATTGACACAGGAGTTAATTCTAAAGTTAAGAGTCATGTGACTATTAGGCGAACTGTTTTAGAAGAAATTGGAAATAGAGTTACAACCAGAGCAGCACAAGTAGCTAAGAAAGCTCAGAACACCAAAGTTCCAGTTCAACCCACCAAAACAACAAATGTCAACAAACAACTGAAACCTACTGCTTCTGTCAAACCAGTACAGATGGAAAAGTTGGCTCCAAAGGGTCCTTCT…
>STRG.44252.5
GCTCAGCATTTGGGGACGCTCTCAGCTCTCGGCGCACGGCCCAGCTTCCTTCAAAATGTCTACTGTTCACGAAATCCTGTGCAAGCTCAGCTTGGAGGGTGATCACTCTACACCCCCAAGTGCATATGGGTCTGTCAAAGCCTATACTAACTTTGATGCTGAGCGGGATGCTTTGAACATTGAAACAGCCATCAAGACCAAAGGTGTGGATGAGGTCACCATTGTCAACATTTTGACCAACCGCAGCAATGCACAGAGACAGGATATTGCCTTCGCCTACCAGAGAAGGACCAAAAAGGAACTTGCATCAGCACTGAAGTCAGCCTTATCTGGCCACCTGGAGACGGTGATTTTGGGCCTATTGAAGACACCTGCTCAGTATGACGCTTCTGAGCTAAA…
>STRG.44255.1
GTCATCACGCAGGGCCGAGTCGGCGCGGCCACATCCTTTAAATATGGTCTTTTTTGGGCGCGCGCGACAATGTGAGGAGTGGGGTGGAGCGTGTGTGGTGTGTGGCTGCGGCCTGGGCAAGAGCCGCCGCGGACCATGAGCTGAGTAAGTTCTGGAGGGATCCTGCCTCTTGGAGCCTTCGCAGCCAGGCAGCTGTGAACTGTGAGCTAGAGTGAAGCAGAAATCTAGGAAGATGAGCTCCAAGATGGTCATAAGTGAACCAGGACTGAATTGGGATATTTCCCCCAAAAATGGCCTTAAGACATTTTTCTCTCGAGAAAATTATAAAGATCATTCCATGGCTCCAAGTTTAAAAGAACTACGTGTTTTATCCAACAGACGTATAGGAGAAAATTTGAA…
>STRG.44288.1
AGAGGGCCGGAGCGAGAAGATGGCGAAGACGTACGATTATCTCTTCAAGCTCCTGCTGATCGGCGACTCGGGGGTAGGCAAGACCTGCCTCCTGTTCCGCTTCTCAGAGGACGCCTTCAACACCACCTTCATCTCCACCATCGGAATTGATTTTAAAATTAGAACGATAGAACTAGATGGAAAGAAAATTAAGCTTCAGATATGGGACACAGCGGGTCAGGAAAGATTCCGAACAATCACGACAGCGTACTACAGAGGAGCCATGGGCATTATGCTGGTCTATGACATCACAAATGAAAAATCCTTTGACAATATTAAAAATTGGATCAGAAACATTGAAGAGCATGCCTCTTCCGATGTCGAAAGAATGATCCTGGGTAACAAATGTGATATGAATGA…
>STRG.44377.1
ATGCCGACGGACTGTGTCCGGCGATGGGCACGGGCATTTCTTCGTTTATAGCTGTCTGTTTGCATTCTGATTGGGAACACTGGGATCATTTTCATCATGCCGACAGTGGTGGTAATGGATGTATCCCTTTCCATGACCCGACCTGTGTCTATTGAGGGGTCCGAGGAATACCAGCGTAAGCACCTAGCAGCCCATGGTTTAACGATGCTGTTTGAGCACATGGCCACAAATTACAAGCTTGAATTTACAGCACTTGTGGTTTTTTCATCACTTTGGGAGTTGATGGTCCCCTTCACGAGAGATTATAATACCCTACAGGAAGCACTAAGTAATATGGATGATTATGACAAAACCTGCTTGGAGTCTGCATTAGTTGGTGTTTGCAATATCGTTCAGCAA…
>STRG.44415.3
ACTGCTCTTATTTTAATTATTGCAGACGGAAGTTGAAGACTATTGACATAGTAAATAGCTCTGGGTGGCTTGAAACGAAAGTTTAACTTTGCGGACAAACAGGACTTATTGTAGGGGGTGGTCAAAATAGTCCCGGCGGGGCGGGGCCATGACCCCTGACGTCGCCGGTCCGGCGCGCAGTTCAGTTTGGCGGTTCCGGTACCGCTCTCACATTGGGGCGGGATGTGGGAGCGGCTGAACTGCGCAGCAGAGGACTTTTATTCTCGTCTCCTTCAGTGTCCTGCAGAGATAAAGTGATGACTGACTCCTGAGTGTGAATAACGGGAGAGATAATGTAGTTCTGTTTTTCACATGTGGTTCTGCGTTTCAGGAAATTTAATGAAGAAAAGAAAGGAATCC…
>STRG.44525.1
AGATCGCCACTTCCGGTGACCAGAGGTAGGGAAGGAAACAATCCCGACCCGGAGTGGACAGGTGAGGAGGGGAGGACTTGCCTCGCCGAGGCCGCTGCGAGGAGCGTGCCCAAGGGCGAAGGTCCAGGGAACCCGGCTCCCGCGCACCGAAGACGGCCGCCATGCCGGCCCGTTGTGTGGCCGCCCACTGCGGCAACACCACCAAGTCTGGGAAGTCGCTGTTCCGCTTTCCCAAGGACCGGGCCGTGCGGCTGCTCTGGGACCGCTTCGTGCGGGGTTGCCGCGCCGACTGGTACGGAGGCAATGACCGCTCGGTCATCTGCTCTGACCACTTTGCCCCAGCCTGTTTTGACGTCTCTTCGGTTATCCAGAAGAACCTGCGCTTCTCCCAGCGCCTGA…
>STRG.44617.3
GGCGCTGGGGCCCTGGGCAGCGCGGGCTCGATGTGTGTCAGCCAAGTAGCTGGTCCCACTGGAGCGGTGAGGTCGCCACCGGATAGTGTTCCTGCCCCATTACTAGCGATCTGTGACCTTGGGCCAGTGATTTTACTGAGTCTTGCTTCCCTCATCTTTAAAATGTGGCTAATGCCTGCCTTAGGGAACCGTTGTGAGGATTAAGTGAGACATGGTATATAAAACGACCTCCTTCTGGCATAAACTTGAGGTGGAAGATACCTTGAGGATGCTTGAAGGTCTGCTAGGCAGCTTCACAGCCTTTTCTTTCCTCTTCTCTATCAGAGGTCTCTTTGGAAGCAATAATGATGACTATAACAAGAACTTATCTTGCTTTGCAAGATTCTTCCGCCGTCAGAG…
>STRG.44617.1
AGAGTGAGTGTTTACACCGGCGGCAGTGCGGCCGGGTTCCTTCCGCGGGACGGGTGAGGGCGCTGGGGCCCTGGGCAGCGCGGGCTCGATGTGTGTCAGCCAAGTAGCTGGTCCCACTGGAGCGGGAGAAAGAGAGAGCGCGAAAGAGAGAGGATGTCTCTCTCAGACTGGCACCTGGCGGTGAAGCTGGCTGACCAGCCACTTACTCCAAAGTCTATTCTTCGGTTGCCAGAGACAGAACTGGGAGAATACTCGCTAGGGGGCTATAGTATTTCATTTCTGAAGCAGCTTATTGCTGGCAAACTCCAGGAGTCTGTTCCAGACCCTGAGCTGATTGATCTGATCTACTGTGGTCGGAAGCTAAAAGATGACCAGACACTTGACTTCTATGGCATTCAA…
>STRG.44714.1
GCGGATGCCAGAACGCGCTCTCAGCTTCGGGTCCTGCGGCTGCGGCTGCCGCCATCATGGTGCGGAAGCTTAAGTTCCACGAGCAGAAGCTGCTGAAGCAGGTGGACTTCCTGAACTGGGAGGTCACCGACCACAACCTGCACGAGCTGCGCGTGCTGCGGCGTTACCGGCTGCAGCGGCGGGAGGACTACACGCGCTACAACCAGCTGAGCCGTGCCGTGCGTGAGCTGGCGCGGCGCCTGCGCGACCTGCCCGAACGCGACCAGTTCCGCGTGCGCGCTTCGGCCGCGCTGCTGGACAAGCTGTATGCTCTCGGCTTGGTGCCCACGCGCGGTTCGCTGGAGCTCTGCGACTTCGTCACGGCCTCGTCCTTCTGCCGCCGCCGCCTCCCCACCGTGC…
>STRG.44834.1
CCTCCCGGAAGCGCAGAGCTCCGCTGGTGCCACGTCTATCCCCTTACATCCTCCTAGGACCCGGTCGGTAGTCGTCGCCCCAGCCCGCCGGGGGCGCAGCGCCCGAGCCGCGGCCCTCGAGACGGGACCGAGAGCATCATGGGCAGCACTGTCCCGCGCTCCGCCTCCGTGCTGCTTCTGCTGCTGCTCCTGCGCCGGGCCGAGCAGCCCTGCGGGGCCGAGCTCACCTTCGAGCTGCCGGACAACGCCAAGCAGTGCTTCCACGAGGAGGTGGAGCAGGGCGTGAAGTTCTCCCTGGATTACCAGGTCATCACTGGAGGCCACTACGATGTTGACTGCTATGTAGAGGACCCCCAGGGGAACACCATCTACAGAGAAACGAAGAAGCAGTACGACAGC…
>STRG.44852.6
GGAGTACAGCTTCAAGTGAAGTTAATCTGAGGTGAAGCAAACAGAAAATTGTGGAGGTTTTGTTGGAATGAATCTGAAGTCTGCTGCAGTAAAACACAGAAGGCTTTAAAATGTTTTCTTGCATAAAATTCAAAACTTTTAAGTAGCTGCTTATGAGAATAGGGAAGGCAGAAAGCTAATGTCTGTCTCAAGATACAGGACAGCTGTTTGCTCATCAACCTCAACTGTGTGTGCAACTGAGGAACATGGCTCAAGAAACTAATCACAGCCAAGTGCCTATGCTTTGTTCCACTGGCTGTGGATTTTATGGAAACCCTCGTACAAATGGCATGTGTTCAGTATGCTATAAAGAACATCTTCAAAGACAGAATAGTAGTAATGGTAGAATAAGCCCACCTG…
>STRG.44857.5
AGTCCTGCTCTCCGCACGCCACCTTAGGCCCGCAGCCGTGCCGGGTGCTCTTCAGCATGTCCTTCATCCCGGTGGCCGAGGATTCCGACTTCCCCATCCACAACCTGCCCTACGGCGTCTTCTCGACCAGAGGCGACCCAAGACCGAGGATAGGTGTGGCCATTGGCGACCAGATCCTGGACCTCAGCATCATCAAGCACCTCTTTACTGGTCCTGTCCTCTCCAAACACCAGGATGTCTTCAATCAGCCTACACTCAACAGCTTCATGGGCCTGGGTCAGGCTGCCTGGAAGGAGGCGAGAGTGTTCTTGCAGAACTTGCTGTCTGTGAGCCAAGCCAGGCTCAGAGATGACACCGAACTTCGGAAGTGTGCATTCATCTCCCAGGCTTCTGCCACGA…
>STRG.44959.1
GCCTTTCCCGGAAGGCAGGGAGGCAGCGCCGGCCTCCGGAGGCGGCCTGGGCGATGGCGGCGGAGTTTTGTCCATAACGTGGGCAACCGCGCAGCTGGAGGATGGCCTCACTCGGGCCTGCCGCAGCTGGGGAGCAGGCGTCGGGGGCTGAGGCGGAGCCGGGCCCCGCGGGGCCGCCGCCGCCGCCCTCACCGTCCTCTCTGGGGCCCCTGCTCCCCCTGCAGCGGGAACCTCTCTACAACTGGCAGGCGACCAAGGCGTCGCTGAAGGAGCGCTTCGCCTTCCTCTTCAACTCGGAGCTGCTGAGCGATGTGCGCTTCGTACTGGGCAAGGGTCGCGGCGCCGCCGCCGCTGGGGGCCCGCAGCGCATCCCCGCCCACCGCTTCGTGCTGGCGGCCG…
>STRG.45136.2
AGCCCAGTGCGCCGGCTCTGTGCCGGGGTGCCCGGGCGGTCGGGAGAATGAGCCGCATCTACCACGACGGCGCGCTCCGGAACAAGGCGGTGCAGAGCGTCCGGCTGCCAGGGGCCTGGGACCCCGCCGCCCACCAGGGGGGAAATGGTGTCCTGCTGGAGGGAGAACTGATCGATGTATCTCGGCACAGCATCTTGGACACTCATGGCAGGAAGGAGCGCTACTACGTGCTGTATATCCGGCCCAGTCACATCCATCGCCGTAAATTCGACGCCAAGGGAAATGAAATCGAGCCCAACTTCAGCGCCACCAGGAAGGTGAACACGGGCTTCCTCATGTCGTCCTACAAGGTGGAAGCCAAGGGGGACACTGACAGGCTCACGCCCGAGGCGCTGAAGG…
>STRG.45271.1
AGGCTGCTTTGTTTACCTAAGCAAGCCTGGGCAATGGCGGGCGCCCCTCCCCCAGCCTCGCTGCCGCCTTGCAGTTTGATCTCAGACTGCTGTGCTAGCAATTAGCAAGACTCCGTGGGCGTAGGACCCTCCGAGCCAGGTGCGGGTTATAATCTACTGGTGCGCCGTGTTTTAAGCCCGTGGAAAAGCACAGTATTAGGGTGGGAGTGACCCGATTTTCCAGGTGCCGTCGGTCACCCCTTTCTTTGACTAGGAAAGGGAACTCCCTGACCCCTTGCGCTTCCCGAGTGAGGCAATGTCTCGCCCTGCTTTGGCTCGCGCATGGTGCGCTGCACCCACTGTCCTGCGCCCACTGTCTGGCACTCCCTAGTGAGATGAACGCGGTACCTCAGATGGAAA…
>STRG.45403.1
AGTCGCGCCGGGGCTGAGCGCCGAGCGGGGCGGCGGCGGGGCGGGCGGCGGCTCCTCGGCGGCTCCGCGGCGCCCGGGCCGCGCGCCGCCATGCTGGGCCTGGACGCGTGCGAGCTGGGGGCGCAGCTGCTGGAGCTGCTCCGGCTGGCGCTGTGCGCCCGAGTCCTCCTGGCTGACAAGGAGGGTGGGCCGCCGGCAGTGGACGAGGTGTTGGATGAGGCTGTGCCCGAGTACCGGGCGCCGGGGAGGAAGAGCCTCTTGGAGATCCGGCAGCTGGACCCGGACGACAGGAGCCTGGCCAAGTACAAGCGGGTGCTGCTGGGGCCCCTGCCACCGGCCGTGGACCCAAGCCTGCCCAATGTGCAGGTGACCAGGCTGACACTCCTGTCGGAACAGGCT…
>STRG.45411.2
GAGTTCGCAGCTGCGCGCCGGGTCCTGGAGGCCGAGGCCGCTCCCGCCCGTTGTCCCCGCAGTCCCCGACGGGAGCGCCATGGCCCAGCCGCCGCCCGACGTGGAGGGGGACGACTGTCTCCCCGCGTACCGCCACCTCTTCTGCCCGGACCTGCTGCGGGACAAAGTGGCCTTCATCACAGGAGGCGGCTCTGGGATTGGGTTCCGGATTGCTGAGATTTTCATGCGGCACGGCTGCCATACGGTGATTGCCAGTAGGAGCCTGCCGCGAGTGCTGACGGCCGCCAGGAAGCTGGCTGGGGCCACCGGCCGGCGCTGCCTCCCTCTCTCTATGGACGTCCGAGCGCCCCCAGCTGTCATGGCCGCCGTGGACCAGGCTCTGAAGGAGTTTGGCAGAAT…
>STRG.45424.3
GTTGTTGCTGCCGCGATGCTGGTGGCGGCGGCCGCGGAGCGGAACAAGGATCCCATCTTGCACGTGCTGCGGCAGTACCTGGATCCGGCCCAGCGTGGCGTCCGCGTCCTCGAGGTGGCCTCGGGCTCCGGCCAGCACGCAGCGCACTTCGCGCGGGCCTTCCCCCTGGCCGAGTGGCAGCCGTCGGACGTGGACCAGCGCTGCCTGGACAGCATCGCGGCCACCACGCAAGCCCAGGGCCTGACCAACGTGAAGGCCCCGCTACACCTGGACGTGACGTGGGGCTGGGAGCACTGGGGCGGGATCCTGCCACAGTCGCTGGACCTGTTGCTCTGCATCAACATGGCCCATGTCAGCCCCCTGCGCTGCACGGAGGGGCTCTTCAGAGCAGCAGGACAC…
>STRG.45443.2
AGTGCGGCCGTCATGGCGTCGCCCTTCAGCGGGGCGCTGCAGCTGACGGACCTGGATGACTTCATCGGGCCGTCTCAGGAGTGCATCAAGCCTGTCAAAGTGGAAAAAAGGGCGGGAAGTGGCGTGGCCAAGATTCGCATTGAAGATGACGGGAGCTACTTCCAAATTAACCAAGACGGCGGGACCCGGAGGCTGGAGAAGGCCAAGGTCTCGCTAAACGACTGCCTGGCGTGCAGCGGCTGCATCACCTCCGCAGAGACCGTGCTTATCACCCAGCAGAGCCACGAGGAGCTGAAGAAGGTTCTAGATGCTAACAAGATGGCGGCACCCAGTCAGCAGAGGCTGGTTGTAGTTTCGGTCTCACCACAGTCTAGAGCATCGCTGGCTGCACGGTTTCAG…
>STRG.45451.1
GCGGAAGCGCTGCCAGGCGTCCGGAGCGGAGCTTCCAGGGTCTCTGGGTCGCCAGCGCGCGGGCGCGCGGCTGGAGCCGGCGCCGGGCACGGCATCGGGGGCCTGGACTGCACGGCCCGGCAGCAGGCCGGCCATGGAGCCAGGCAGCGTGGAGAACCTGTCCATCGTGTACCGGAGCCGCGACTTCCTGGTGGTCAACAAGCACTGGGACGTTCGCATTGACAGCAAGGCGTGGCGGGAGACTCTGACCCTGCAGAAGCAGCTGCGGTACCGCTTTCCCGAGCTGGCCGACCCTGACACCTGCTACGGGTTCAGGTTCTGCCACCAGCTGGATTTCTCCACCAGCGGGGCGCTGTGCGTGGCCCTAAACAAGGCAGCCGCCGGCAGCGCGTACAGGTG…
>STRG.45562.1
GTCAGTCGAGGAGTCAAGGCAGCAATGAATCGTGTCTTGTGTGCCCCGGCGGCCGGGGCCGTCCGGGCGCTGAGGCTCATAGGCTGGGCTTCCCGAAGCCTTCATCCGTTGCCCGGTTCCCGGGATCGGGCCCACCCTGCCGCCGAGGAAGAGGACGACCCTGACCGCCCCATTGAGTTTTCCTCCAGCAAAGCCAACCCTCACCGCTGGTCGGTGGGCCATACCATGGGAAAGGGACATCAGCGGCCCTGGTGGAAGGTGCTGCCCCTCAGCTGCTTCCTCGTGGCGCTGATCATCTGGTGCTACCTGAGGGAGGAGAGCGAGGCGGACCAGTGGTTGAGACAGGTGTGGGGAGAGGTGCCAGAGCCCAGTGATCGTTCTGAGGAGCCTGAGACTCCA…
>STRG.45590.1
GGGAGGCTGACGGCCCGCGGGCGTAAGCGGACTGCAGCCGCGAGCTCCTGGAGGCGGCGGGATGGAGGCGGCGGCCGAGCCTGGAAACCTGGCCGGCGTCAGGCACATCATCCTGGTCCTCTCAGGAAAGGGGGGCGTTGGGAAAAGCACCATCTCCACGGAGCTGGCCCTGGCACTGCGCCATGCAGGCAAGAAGGTGGGAATCCTGGATGTGGACCTGTGTGGCCCCAGTATCCCCCGCATGCTCGGGGCGCAGGGCAGGGCTGTGCACCAGTGCGACCGCGGCTGGGCACCCGTCTTCCTGGACCGGGAGCAGAGCATCTCGCTCATGTCTGTGGGCTTCCTGCTGGAGAAGCCGGACGAGGCCGTGGTGTGGAGAGGCCCCAAGAAAAACGCGCT…
>STRG.45600.1
GGTCAGTTGGCAGCGGCAAGCGCGCTGCGGTTCCGGTGGCGCCATGTCGTTCTGCAGCTTCTTCGGGGGCGAGGTTTTCCAGAATCACTTTGAACCTGGCGTTTACGTGTGTGCCAAGTGTGGCTATGAGCTGTTCTCCAGCCGCTCGAAGTATGCACACTCGTCTCCATGGCCGGCGTTCACCGAGACCATTCACGCCGACAGCGTGGCCAAGCGTCCGGAGCACAATAGATCTGAAGCCTTGAAGGTGTCCTGTGGCAAGTGTGGCAATGGGTTGGGCCACGAGTTCCTGAACGACGGCCCCAAGCCGGGGCAGTCCCGATTCTGAATATTCAGCAGCTCGCTGAAGTTTGTCCCTAAAGGCAAAGAAACTTCTGCCTCCCAGGGTCACTAGGCGGG…
>STRG.45604.2
GGGCGACCTAGGCCGCGGGACCCGGACGGAGGTAGAGGCCAGGGCAGCGCGTCCGGGAGCGGAGTCCGCGCCCGCCGCCGCCATGCCGGACAGCTGGGACAAGGATGTGTACCCTGAGCCCCCGCGCCGCACGCCGGTGCAGCCCAATCCCATCGTCTACATGATGAAAGCGTTCGACCTCATCGTGGACCGACCCGTGACCCTCGTGAGAGAATTTATAGAGCGGCAGCACGCAAAGAACAGGTATTACTACTACCACCGGCAGTACCGCCGCGTGCCAGACATCACTGAGTGCAAGGAGGAGGACATCATGTGCATGTATGAAGCCGAAATGCAGTGGAAGAGGGACTACAAAGTCGACCAAGAAATTATCAACATTATGCAGGATCGGCTCAAAGC…
>STRG.45635.5
CGCAGCCCGCCCCTGCGGCAGAGTGGCGCCCGCGCGTGACTCCCCCCTGCCGGCTGCGGAGGTGGGGGGGGGACGGCGCCCCCGCCGTGTGCGTGGGGCGGGGATGGAGCACGCGCCCTGGAGCCCCGGAGCCAGATGCTCTGACCTTTGACCCCTGCCGTTCAGCTCTAGGGCCCGTGCAGGCCACACCATGAACACCTCCCCAGGCACGGTGGGCAGTGACCCGGTCATCCTGGCCACTGCAGGCTACGACCACACCGTGCGCTTCTGGCAGGCCCACAGCGGCATCTGCACCCGGACGGTGCAGCACCAGGACTCCCAGGTGAATGCCTTGGAGGTCACACCGGACCGCAGCATGATTGCTGCTGCAGGTTACCAGCACATCCGCATGTATGATCT…
>STRG.45636.5
GAGGGCGCCGCGGCGGGCGGCTGCGAGGAGCGGCCGGCGGGCGGCGGCGGCCGGCGGGCGGCGATGGCGGCGGCGGAGGCCGGTGGCGACGACGCCCGCTGCGTGCGGCTGAGCGCCGAGCGGGCACAGGCGCTGCTGGCCGACGTGGACACGCTGCTGTTCGACTGCGACGGCGTGCTGTGGCGCGGGGAGACCGCCGTGCCTGGCGCGCCCGAGGCCCTGCGGGCGCTGCGAGCCCGCGGCAAGCGCCTGGGCTTCATCACCAACAACAGCAGCAAGACCCGCGCTGCCTACGCCGAGAAGCTGCGGCGCCTGGGCTTCGGCGGCCCCGCGGGGCCCGGCGCCAGCCTGGAGGTCTTCGGCACGGCCTACTGCACCGCGCTCTACCTGCGCCAGCGC…
>STRG.45699.1
ATGCCCCGCGCCGCGTCCCTTCCCCCGGCGCAGCCCCGCCCCGTGCCGCCCCGCAGCCGCCGCCATTTTAAGTGATCTGGAAGCGGGCGGTATCGAGGGGCGTGCGGCCGCCATCCCGACGGCGGGCATGGCCTTTGGAGGCGGTGGCGCCGTCTTGGGACTGGCAGAGGGGAGGTCCCCGTGTTGGTGCGGTCCGGCGGGCTCCAAGCTCGGGCACACCGAGCTCGGGGCCGTCTTGTCGCGGCGTAGTCGTGGCCGCCATCTTGGGCAGGCTCCGCATTTGGGGTCTTCTGGCCGCCGTGCTGGGGACAGTCACCCCCGCTCCCTGACCCGGGCTGGATGCGAGGACTGTCGCCGCTCAGAGGGGCTTATGACCTGTGAAGAGCCCTGGGGGCTGCT…
>STRG.45721.1
ACAGCCGCGAGGTTCTGCGCGGGCGCGGAAGACGGGCGGCGCGTGGCGGAAGGCAGGCTTGCTCCTCGGGGTGGGGGAGGGTATCCGGCTTAAGGGGGCTGCGGTGGACACCACTTCTTAATGTCGGGGGTCTTCGCGGCGCTCACCTCGGCTCCTAGGGTTCGGGACGGTACGCACCAGCCACCTTCGCGCCGAAGGCGGTAGGGCGCCACGGAGAGGAACCGCTCTAGGCACGTAAGGCCTCGTGAGGTTGCGTCGCGCGCGGAGCACTCTGGGACTTGTAGTTCTGGAGATGGAGCGAGCTGTGCCGCTCGCGGTGCCTCTGGGTCAGACAGAGGTGTTCCAGGCCTTGCAGCGGCTCCATATGACCATCTTCTCCCAGAGCGTCTCACCATGTGG…
>STRG.45726.5
GGTGGGGTGGGGAAAGCAGCCCATTCCTGGGCTCAGAGACTCCCACCCCAGCTCAGAGGGAGCAGGGGCCCAGCCAGGGACGGACCCTCATTCCTCCCAGGGACCCCAGACCTCTGTCTCTCTCGGCAGGCCTTGGCTCCTTGAACTTTTGGCCGCCATGTGCTTCCCGAAGGTCCTCTCTGATGACATGAAGAAGCTGAAGGCCCGAATGCACCAGGCCATAGAAAGATTTTATGATAAAATGCAAAATGCAGAATCAGGACGTGGACAGGTGATGTCGAGCCTGGCAGAGCTGGAGGACGACTTCAAAGAGGGCTACCTGGAGACAGTGGCGGCTTATTATGAGGAGCAGCACCCAGAGCTCACTCCTCTACTTGAAAAAGAAAGAGATGGATTACG…
>STRG.45782.1
GCTCTGGGAGTACGACATGGCGCGCGAGCTGCGGGCGCTGCTGCTGTGGGGCCGCCGCCTGCGGCCTTTGCTGCGGGCGCCGGCGCTGGCGGCCGTGCCGGGAGGAAAACCAATTCTGTGTCCTCGGAGGACCACAGCCCAGTTGGGCCCCAGGCGAAACCCAGCCTGGAGCTTGCAGGCAGGACGACTGTTCAGCACGCAGACCGCCGAGGACAAGGAGGAACCCCTGCACTCGATTATCAGCAGCACAGAGAGCGTGCAGGGTTCCACTTCCAAACATGAGTTCCAGGCCGAGACAAAGAAGCTTTTGGACATTGTTGCCCGGTCCCTGTACTCAGAAAAAGAGGTGTTTATACGGGAGCTGATCTCCAATGCCAGCGATGCCTTGGAAAAACTGCG…
>STRG.45538.4
AGCCAAGATGGCGGCCTCATGCTTGGTCCTGCTGGCGCTGTGTCTGCTGCTGCCGCTGCTGCTGCTGGGAGGATGGAAGCGCTGGCGCCGGGGGCGGGCGGCCCGGCATGTAGTAGCGGTGGTGCTGGGCGACGTGGGCCGCAGCCCCCGTATGCAGTACCACGCGCTGTCGTTGGCCATGCACGGCTTCTCGGTGACCCTCCTGGGGTTCTGCAACTCCAAACCCCATGATGAGCTCTTGCAGAACAACAGAATTCAGATTGTGGGGTTGACAGAACTTCAGAGTCTTGCAGTTGGGCCCCGAGTTTTCCAGTACGGAGTCAAAGTTGTACTTCAGGCTATGTACTTGCTGTGGAAGTTGATGTGGAGGGAGCCAGGTGCCTATATCTTTCTCCAGAA…
>STRG.45799.5
AGTCGGAGCGAAGCGGCTGGCGGAGCAGAACGGATTGCAGGGTCAGCCATGTCATCTGAGCCTCCCCCACCACCACAGCCCCCCACCCATCAAGCTTCAGTCGGGCTGCTGGACACCCCTCGGAGCCGTGAGCGCTCACCATCCCCTCTGCGGGGCAACGTGGTCCCAAGCCCACTGCCCACTCGCCGGACGAGGACCTTCTCGGCGACGGTGCGGGCTTCACAGGGCCCCGTCTACAAAGGAGTCTGCAAATGCTTCTGCCGGTCCAAGGGCCATGGCTTCATTACTCCAGCTGATGGCGGCCCCGACATCTTCCTGCACATCTCTGATGTGGAAGGGGAGTATGTCCCAGTGGAAGGCGACGAGGTCACCTATAAAATGTGCTCCATCCCACCCAAG…
>STRG.46058.6
GAGGACTCGTTGGGGAGGTGGCCTGCGCTTGTAGAGACTGCATCCCCGAGACGATGGCGGAGGGAGATAATCGCAGCACCAACCTGCTGGCTGCAGAGACTGCAAGTCTGGAAGAACAGCTGCAAGGATGGGGAGAAGTGATGCTGATGGCTGATAAAGTCCTCCGATGGGAAAGAGCCTGGTTTCCACCTGCCATCATGGGTGTGGTTTCTTTGGTGTTTCTGATTATCTACTATCTAGATCCATCTGTTCTGTCCGGCGTTTCCTGTTTTGTTATGTTTTTGTGCTTGGCTGACTACCTTGTTCCCATTCTAGCGCCTAGAATTTTTGGCTCCAATAAATGGACCACTGAACAACAGCAAAGATTCCATGAAATTTGCAGCAATCTAGTAAAAACTC…
>STRG.46058.7
GGGTTGTGGTTGGTGTGCGGGTTTCGGTTGGAGGACTCGTTGGGGAGGTGGCCTGCGCTTGTAGAGACTGCATCCCCGAGACGATGGCGGAGGGAGATAATCGCAGCACCAACCTGCTGGCTGCAGAGACTGCAAGTCTGGAAGAACAGCTGCAAGGATGGGGAGAAGTGATGCTGATGGCTGATAAAGTCCTCCGATGGGAAAGAGCCTGGTTTCCACCTGCCATCATGGGTGTGGTTTCTTTGGTGTTTCTGATTATCTACTATCTAGATCCATCTGTTCTGTCCGGCGTTTCCTGTTTTGTTATGTTTTTGTGCTTGGCTGACTACCTTGTTCCCATTCTAGCGCCTAGAATTTTTGGCTCCAATAAATGGACCACTGAACAACAGCAAAGATTCC…
>STRG.46108.1
GACTTCCGGCAGCTGGACTTGGAAAAGCAAGGAGTGTCGGGAATGGCGACCAAGCGGCTCGCGCGGCAGCTTGGATTAATTAGGAGAAAGTCAATTGCGCCAGCAAATGGAAATCTCGGAAGAAGCAAATCCAAGCAGTTGTTTGACTACTTAATTGTCATTGATTTTGAATCGACATGCTGGAATGATGGGAAGCACCACCATAGCCAGGAAATAATTGAGTTTCCAGCAGTGTTGCTGAACACATCAACTGGACAGATTGACTCTGAGTTCCAGGCTTATGTTCAACCTCAGGAACATCCAATTCTTTCAGAATTTTGCATGGAATTGACAGGCATAAAGCAGGCTCAAGTTGATGAAGGAGTCCCTCTGAAGATTTGCTTATCTCAGTTCTGTAAA…
>STRG.46152.2
GGTTCCGTCTGTGCGGGCCGCGCCGCGGCTGCTGGTCCCGGGCGCGCGGAGGGCGCGAGCGGCGCGCGGGGGCCGAGGGGGCGCGAGGCAGCGGCGCGGGGACTCCGGGCCCCGGCGGCGGCCCATGGGGCGGGAGGCGTGAGGCCGCTGCCTGTCCGGGGCTCGGGGGGTGGGGGGAGCGGGGCGGGGAGATGGATAAACTGACCATCATCTCAGGATGTCTCTTTCTGGCCGCCGATATCTTCGCCATCGCCAGCATCGCCAACCCGGACTGGATCAACACCGGGGAGTCTGCGGGAGCACTCACTGTGGGCCTCGTGCGACAGTGTCAAACAATCCATGGACGAGACCGGACGTGCATCCCTCCCCGGCTTCCCCCGGAGTGGGTCACCACACTGT…
>STRG.46177.7
GGATTCGCAGAGGCATTTTTGGAACATCTTTGGAAAAAATTGCAGGATCCAAGTAATCCTGCCATCATCAGGCAGGCTGCTGGAAATTATATTGGAAGCTTTTTGGCAAGAGCTAAATTTATTCCTCTTATTACTGTAAAACCATGCCTAGATCTTTTGGTTAACTGGCTGCACATATACCTTAATAACCAGGATTCGGGAACAAAGGCATTCTGCAATGTTGCTCTCCATGGACCATTTTACTCAGCCTGCCAAGCTGTGTTCTACACCTTTGTTTTTAGACACAAGCAGCTTTTGAGCGGAAACCTGAAAGAAGGTTTGCAGTATCTTCAGAGTCTGAATTTTGAGCGGATAGTGATGAGCCAGCTAAATCCCCTGAAGATTTGCCTGCCCTCAGTG…
>STRG.46445.1
GCCGGAAGTAGGAGCGGCGGCGGCGGCGGCGGCGGCGGTCGAAAGCGGAGTGAAAGAGGGAGGCAGGGAGCCGGAGAGCCGGAACCGGAGTCGCAGCGGCGGAGACCCCTGTGCGGTGCGGAGGGGGCGGCGGCCCCGACTCTGACCCGCGCCGGGGGTGGGCCATGGCGGAGATCAGCGACCTGGACCGGCAGATCGAGCAGCTGCGTCGCTGCGAGCTCATCAAGGAGAGCGAAGTCAAGGCCCTGTGCGCTAAGGCCAGAGAGATCTTGGTAGAGGAGAGCAACGTGCAGAGGGTGGACTCGCCAGTCACAGTGTGCGGCGACATCCATGGACAATTCTATGACCTCAAAGAGCTGTTCAGAGTAGGTGGCGACGTCCCTGAGACCAACTACCTCT…
>STRG.46482.2
CCCCGCCCCCGGTGGCCGCCCCCGGGACGCCTGGGTCCGAGCCCGCTCCCGGCTTGGCGCGGAGCCTGCATCCCGGAGCCGCTGGCGGCTCGGGCGCCTGCACCCCGCTGAGGAGCTCCGGAGGGCGCCGGGGTGGCGGAGCCGGAGGCGGCCGGCAAGGGCGGCGTGCCGGCGATGGAGCGCGCGGTAGAGCCTTGGGGCCCAGATCTCCACCGCCCGGAGGAGAGGGAGCCACAGAGAGGCGCCCGCACAGGTCTAGGGAGTGAGAACGTGATTTCTCAGCCGAATGAGTTTGAACATACCCCACAGGAAGATGACTTGGGGTTCAAGGAAGAAGATTTGGCTCCAGATCATGAAGTAGGAAATGCCTCTCTCAAACCTGAAGGCATCCAGAACTGG…
>STRG.46486.1
GAGCGTGGCTCGTGGGTTTTCCGTGAAGTCGCGGTGCAGCGGTGGGCGGCATGTCTGTGGCCGGTGGGGAGATTCGTGGGGACACGGGGGGAGAGGACACTGCTGCTCCCGGCCGGTTCAGCTTCAGCCCGGAGCCCACGCTCGAGGACATCCGCCGCCTCCATGCTGAGTTTGCTGCGGAACGAGACTGGGAACAGTTCCATCAGCCTCGGAATCTCCTCCTGGCCTTGGTTGGGGAAGTGGGGGAGCTGGCAGAACTCTTTCAGTGGAAAACCGATGGGGAACCTGGCCCCCAAGGCTGGTCCCCCAGGGAACGGGCAGCCCTTCAAGAGGAGCTTAGTGACGTCCTCATCTACCTGGTGGCATTAGCAGCCCGCTGCCGTGTGGATCTGCCGCTAG…
>STRG.46648.1
ACTTCAGTGGATCCCGCGCCGGGGCCGCGGGCGGAGCTGCCTGCCGGTCCCGCGCCGCGCGTCCGCACTCCTCGGCCCTCGGGCGGTCGATGGGACGGGGCGCCGCGGAGCAGGAGGCGGCGCCCGTCGGGGTGCTCGGGCCGCGCGGGAGCCCACTGTGGGGCTCGGGCATGGCGGGCCGCAGGACCTGAGCTCTCCTCAGGGGAGCGGGGAGGCAGCTGCTGGCCGGCGATGGGGACGGAGTGGGGCCGTCGCCGCCGCGCCGAGCCGTGAGCGCCGAGCCACCGCCGCCGCTACCTCAGCCCTTCGCGAAGCGCCGGGCAGCTCGGGAACATGGCCCTGGAGCGGCTCTGCTCGGTCCTCAAAGTGTTGTTAATAACAGTACTGGTAGTGGAAGGG…
>STRG.46655.1
CGGCATTGCTGACAGGCGGCCCCGGGGGCGGTGGCCAAGGCGGCGACCGGAGCGCGATGGCGGGGGCGGCGGGACTCACGGCAGAAGTGAGCTGGAAGGTCTTGGAGCGAAGAGCTCGGACCAAGCGCTCAGTTTTAAAATTGCTATAGCTTAGCCTGCGACGCTTATGATTAGAGCCAACAATTTGAAATGGCCTGCTCACCTGATGCAGTCGTCTCTCCGTCTTCCGCTTTCTTAAGGTCTGGCTCAGTTTATGAACCTCTTAAAAGCATTAATCTTCCAAGACCTGATAATGAAACTCTCTGGGATAAGTTGGACCATTATTACAGAATTGTCAAGTCAACATTGCTGCTGTATCAAAGTCCAACTACCGGTCTCTTTCCCACTAAAACATGCGGT…
>STRG.46671.1
GAGGACGCGCGAAACGGCGGCGGCGGCGGCGGCCAGGGGGGAGCCGGGGCGGCCGTTGCGGGGCGCGCTCTCGAGAGGCGGCGGCGGCCCAGGGTGTCCCGTCGGTCTCGGCGCCGGGAAGAGGCGGTGGCGCTGCCCGCGGTGGCGGGGGTTGGCGACGGAGCGCGTTGGTGCCAGGACCGGGGTCCGAGGCGCGCTCTCCGCCCACAGAAATGAGCCGTCAGACTGCTACAGCATTACCTACCGGTACCTCGAAGTGTCCACCATCCCAGAGGGTGCCTGCCCTGACTGGCACAACTGCATCCAACAATGACTTGGCGAGTCTTTTTGAGTGTCCAGTCTGCTTTGACTATGTGTTACCGCCCATTCTTCAATGTCAGAGTGGCCATCTTGTTTGTA…
>STRG.46693.2
AGAGGTGGGAGTTGGCGCTGCGGGCCGGGCGGGGGCCGCGGAAGCTGCGATGCGGACAGGGCAGCGGCGGTGACCCGAGCTGCCGCCCGACATGAACTCGCTGGAGCAGGCGGAAGATCTCAAGGCTTTTGAGAGGAGACTTACTGAATATATTCATTGTTTGCAACCTGCTACTGGACGCTGGAGAATGCTTCTTATAGTGGTATCTGTCTGTACAGCTACTGGTGCCTGGAACTGGTTAATAGACCCTGAGACACAAAAGGTGTCCTTCTTCACATCATTATGGAATCACCCATTTTTCACCATTAGCTGTATCACTCTAATAGGCTTGTTCTTTGCTGGAATACACAAGAGAGTAGTTGCACCATCAATTATAGCTGCTCGATGTCGAACGGTATT…
>STRG.46706.1
AGACGACGCGCCGTGCGCCTGCGCACGGCTTGCCCATGTGTGCTGCAGCCGTCAGCCGGCCCAGCTGAGCAGCAGCAACGGACCTTGTTAACGGCGCGGCAGCCTCCACCGCCTGCTGTTGCCCTCCTCTCTCGGTGGTCTGTCCGCCCAGCGCACGTCACCATGGGCAAGAGCCGGACGAAGCGCTTCAAGCGACCTCAGTTCTCCCCTACGGGCGACTGTCAGGCCGAGGCGGCTGCGGCGGCGAATGGGACCGGAGGCGAGGAGGACGACGGGCCGGCGGCGGAGCTGCTGGAAAAGCTCCAGCACCCGAGCGCCGAGGTCCGCGAGTGCGCCTGCGCAGGGCTGGCCCGGCTGGTGCAGCAGCGGCCGGCACTCCCGGGCCTGGCGCGACGAGAC…
>STRG.46785.1
GCCCAGGCTCTTCCGCGCCGGCAGGGGCAGCAGCGGGAGCAGCGCGGGGCGGAGCGGCGCCAGCAGCCAGGAGCGGCCCGGCCCGGCCCGGCGCGGCGGCGGCGGCGGCAGCGGCAGCGGCAGCGACGCCAGAGCCCGTGGGCGCCGTTCGCGAGGCCGCCGCAGAGGCCCGGCCGCAGCGCAGGGAAGCCTGGGGGCCAGAGGTCGCCGCTGCCGCCATGCCGCTGCTCTTCCTCGAGCGCTTCCCCTGGCCCAGCCTCCGCACCTACACGGGCCTCAGCGGCCTGGCCCTGCTGGGCACCATCATCAGCGCCTACCGCGCGCTCAGCCAGCCCGAGGCCGGCCCCGGCGAGCCGGACCAGCTAACGGCCTCGCTGCAGCCTGAGCCGCCGGCGCCCG…
>STRG.46788.1
GTACCCTCAGGAAGGTAGCGTCTTGATCTGCGTGGCGTGGTTCTGTGCCTTGGGAAGAGATGAATGGGAAGCGGCCAGCGGAGCCCGGCCCAGCCCGGGTGGGAAAAAAGGGAAAGAAGGAGGTGATGGCGGAGTTTTCGGACGCTGTTACGGAAGAAACCTTGAAAAAGCAGGTGGCTGAGGCCTGGAGCCGCAGGACGCCGTTCAGTCACGAAGTCATTGTCATGGACATGGACCCTTTTCTTCACTGTGTGATCCCAAACTTCATCCAAAGCCAAGACTTCTTAGAAGGGCTTCAGAAGGAACTGATGAACTTGGACTTCCATGAGAAGTATAATGATTTATATAAGTTCCAGCAGTCTGATGATTTGAAGAAGAGAAGAGAGCCTCACATCTCCA…
>STRG.46789.1
ACCACGCCTCCTCCAAGTCCCAGCGAACCCGCGTGCAACCTGTCCCGACTCTAGCCGCCTCTTCAGCTCGCCATGGATCCCAACTGCTCCTGCGCCGCCGGTGACTCCTGCACCTGCGCCGGCTCCTGCAAATGCAAAGAGTGCAAATGCACCTCCTGCAAGAAAAGCTGCTGCTCCTGCTGCCCTGTGGGCTGTGCCAAGTGTGCCCAGGGCTGCATCTGCAAAGGGGCGTCGGACAAGTGCAGCTGCTGCGCCTGATGCTGGGACAGCCCCGCTCCCAGATGTAAAGAACGCGACTTCCACAAACCTGGATTTTTTATGTACAACCCTGACCGTGACCGTTTGCTATATTCCTTTTTCTATGAAATAATGTGAATGATAATAAAACAGCTTTGACTT…
>STRG.46806.1
CTCTGCGCGTAATGGCAGCGCCGTGGCCTCGCGTCCATCTTTGCCGTTCTCTCGGACCTGTCACAAAGGAGTCGCGCCGCCGCCGCCGCCCCCTCCCTCCGGTGGGCCCGGGAGGTAGAGAAAAACTGCCATTGGATGTCCAGAATCCCCTGTAGTTGATAATGTTGGGAATAAGCTCTGCAACTTTCTTTGGCATTCAGTTGTTAAAAACAAATAGGATGCAAATTCCTCAACTCCAGGTTATGAAAACAGTACTTGGAAAACTGAAAACTACCTAAATGATCGTCTTTGGTTGGGCCGTGTTCTTAGCGAGCAGAAGCCTTGGCCAGGGTCTGTTGTTGACTCTCGAAGAGCACATAGCCCACTTCCTAGGGACTGGAGGTGCCGCTACTACCATGG…
>STRG.46809.1
AGTGAGCTGGCCGCGGCCTTGGCTGAGAGGCCTTAACCCCGCCGGGCGGCCGCGCCCTGCATGCGAGTTGGGCCGCGGGCGGGGTTGGAGCCTACTCGGGGCGACTGCGATGGACGCCTTAGAAGGAGAGAGCTTTGCGCTGTCTTTCTCCTCCGCCTCTGATGCAGAATTTGATGCTGTGGTTGGATATTTAGAGGACATTATCATGGATGACGAGTTCCAGTTATTACAGAGAAATTTCATGGACAAGTACTACCTGGAGTTTGAAGACACAGAAGAGAATAAACTCATCTACACACCTATTTTTAATGAATACATTTCTTTGGTAGAAAAATACATTGAAGAACAGCTGCTGCAGCGGATTCCTGAGTTCAACATGGCAGCCTTCACCACAACATT…
>STRG.46817.1
GAGTCGACGGCTGGAGAGAAGCCGGGAGCGAGCCCAGGCGGCAGTCTTGATTCCCTTTTGGCCAGCAGTTTTTAGGTCTGTCAGTACTGCACTGCAAGAATGGCAGATTTTGGGATCTCTGCTGGCCAGTTTGTGGCAGTGGTCTGGGATAAGTCATCCCCAGTGGAGGCTCTGAAAGGTCTGGTGGATAAGCTTCAAGCGTTAACCGGCAATGAGGGCCGCGTGTCTGTGGAAAACATCAAGCAGCTGTTGCAATCTGCCCACAAAGAATCCAGCTTTGACATTATTTTGTCAGGTTTAGTCCCAGGAAGCACCACTCTGCACAGTGCTGAGATTTTGGCTGAAATCGCCCGGATCCTTCGGCCTGGTGGATGTCTTTTTCTGAAGGAGCCAGTAGAG…
>STRG.46819.1
GCAGTCACCGCGGAGCAGACGCGGAGGCTGGTGGCCCCTGGGCGAGATGCCGTACGCCAACCAGCCTACCGTGCGGATCACGGAGCTCACTGACGAGAATGTCAAGTTCATCATCGAGAACACCGACCTGGCGGTGGCCAATTCGATTCGGAGGGTCTTCATCGCTGAGGTTCCCATAATAGCCATTGACTGGGTTCAGATTGATGCCAATTCCTCAGTTCTTCATGATGAATTCATTGCTCACAGGCTTGGATTAATTCCCCTCATTAGTGATGACATTGTGGACAAGCTGCAGTACTCTCGGGACTGCACATGTGAGGAGTTCTGCCCCGAGTGCTCGGTGGAGTTCACCCTCGATGTGCGGTGCAATGAAGACCAGACGCGACATGTCACGTCTCG…
>STRG.46869.1
ACCTTCAGCAGGAGCCGGTTCCCTGTGTGTGTGTCCGCTCGCCCTCTGCTCCGTCCTGCGGCTGCCCACTGCCCTCCTACGGTCCACCATGGCCCTGCTGCACTCCGGCCGCGTCCTCCCCGGGATCGCCGCCGCCTTCCACCCGGGCCTCGCCGCCGCGGCCTCTGCCAGAGCCAGCTCCTGGTGGACCCATGTGGAAATGGGACCTCCAGATCCCATTCTGGGAGTCACTGAAGCCTTTAAGAGGGACACCAATAGCAAAAAGATGAATCTGGGAGTTGGTGCCTACCGGGATGATAATGGAAAGCCTTACGTTCTGCCTAGCGTCCGCAAGGCAGAGGCCCAGATTGCCGCAAAAAATTTGGACAAGGAATACCTGCCCATTGGGGGACTGGCTGA…
>STRG.46909.4
AGTGTCGCCTGCCCTCCTTCCGCACAGCCCGGGTTTCCGCTTCCCTCCGGGCGCGAGAAGAGGGGAGCCAGGCCGAGCCCCGGCCCTACCGCCGCCGCCGCCATGTGGCCCCCAGACCCCGACCCCGACCCGGACCCCGAGCCTGCCGGCGGCTCCCGTCCCGGCCCCGCGGTCCCCGGGCTCCGCGCCCTGCTGCCGGCGCGGGCTTTCCTCTGCTCTCTCAAAGGCCGCCTCCTGCTGGCCGAGTCGGGTCTCTCATTCATCACTTTTATCTGCTATGTGGCGTCCTCAGCATCTGCCTTCCTCACAGCGCCTCTGCTGGAGTTCCTGCTGGCCTTGTACTTCCTCTTTGCTGATGCCATGCAGCTGAATGACAAGTGGCAGGGCTTGTGCTGGCCC…
>STRG.47001.1
GATGTGCGCTTCTCCCGCACTAAGGGAAACATGGCTCTAACGCGGCCGGTGCGGCTCTTTTCCCTCGTGACTCGGTTGCTCCTGGCGCCGCGACGGGGCCTCACGGTCCGCAGTCCCGACGAACCCCTGCCGGTGGTGCGCATCCCAGTGGCTCTACAGCGGCAGTTGGAACAGCGGCAGAGCAGGCGGCGGAACCTCCCGAGGCCGGTGCTGGTTCGACCCGGACCGCTGCTGGTTTCGGCGCGGCGGCCGGAGTTGAACCAGCCGGCGCGCCTCACACTGGGCCGTTGGGAGCGCGCGCCGCTAGCCTCTCAAGGCTGGAAGAGTCGACGCGCGCGTCGGGACCACTTCTCCATCGAGCGCGCGCAACAGGAGGCGCCAGCGGTGCGAAAGCTCTCG…
>STRG.47092.4
AGGATACAGTTGATATATTAGTTGGATGGCATATAGATCATACTCAGAAACCTTCGCTCACGCAGCAGGTATCTGGGTGGTTGCAGAGTTTGGAGCCATTTTGGGTAGCTGATCTTGCATTTTCTACGACTCTTCTTGGTCATTTTCTAGAAGACATGGAAGCATATGCTGAGGACCTCAGCCATGTGGCCTCTGGGGAATCAGTGGATGAAGACGTCCCTCCTCCATCAGTGTCATTACCAAAGCTGACTGCGCTTCTCCGGGTATTTAGTACTGTGGTGAGGAGCATTGGGGAACGCTTCAGCCCAATTCGGGTCCTCCGATTACTGAGGCATACGTAACAGATATTCTGTACAGAGTAATGAGATGTGTGACGGCTGCAAACCAGGTGTTTTTTTC…
>STRG.46888.1
GAGTGCCTCCTGGTCCCTGTCTGCCGGCATTCGCGGCTGCGGGGCCCGGAGGTGGGACTGGCTTCCCGGTGCCGCGAGGGCGGGTCCGGACAGCCTTCCCCCCAGTCCGGCGCACCATCTCCCTGCCTTGTGGCTGGAGGCGCCGCGGACCCAAAGGGAGGGACCATCCCGGGAAGCAGCCCCGAGAGCGGAAGTGCAGAATGGCTTCCTCGAGAGAGTAAAGTGCAGCCTCTCCAGACACTGGGGCCCCAGTGGGCGTGGGCGAAGTTGCTGGTAGGAGGAGTTGGCGGAAGCACTTGGAACTCCTTTATAAGTGTCAGCTGTGAGATTTTAATTTGATTTGAAAATGAGTAAGTGCAGAAAGACACCAGTTCAGCAGCTAGCAAGTCCCGCGTCATT…
>STRG.47133.3
GACAGCCCCGATCCTTGCTACGTTTGCGTCGCTCTGCCAGGAGCAGTCGCCTCCTCCTTGGCAAATAGTCCTCGGCAGGGTCCGAGTTCTTGGATAATTCGAGAGAAAAGGCACGATAAGTTGCAGTACGAGGACACGGAAACGACCAGGAGAGGAGGACAGGGAGCGAAGTTTCCTCAATAGTGTGTGAAGTTAGTTAAAAACTCCCTCCTTCCTCAGGATCCCTCCGCCTGCGGTAGCGGTGGTGAGGCCGAGGGAGCCGCCATTTTGGATGTTCGGTTCCTGCTGCCACTGCTGCCGCCGCCCCCGGAGCTGCTGGTTTCATTCGAGGTTTCGGGCCGTTTCAGGGGTCCAGTCCCAGGCTGTGGGTGTTGAGAAGAGAAGACAGAGAAGCTGGGC…
>STRG.47142.5
ATTTTGGATGGTGAACCCTGAAGTCGGTGTCTGCTGCGTTCACGGCAGGATTCGGTTAGGAGGAACAGCACAGCATGCTGGGCTCTGGATTTAAAGCTGAGCGCTTAAGAGTGAATTTGAGATTAGTCATAAATCGCCTTAAACTATTGGAGAAAAAGAAAACGGAACTGGCCCAGAAAGCAAGGAAGGAGATTGCTGACTATCTGGCTGCTGGGAAAGATGAACGAGCTCGGATCCGTGTGGAGCACATTATCCGGGAAGACTACCTCGTGGAGGCCATGGAGATCCTGGAGCTGTACTGTGACCTGCTGCTGGCTCGGTTTGGCCTTATCCAGTCTATGAAGGAACTAGATTCTGGTCTGGCTGAATCTGTGTCTACATTGATCTGGGCTGCTCCTC…
>STRG.47156.1
CGTTTATTGGGCTGTTGAGCGGGGGCCGACCGACGGCCAGGAGTTTCTTTTCTGCGCTTGTGCGTTTTCTGTTCGGTTTCCTTCCCGCTAGCGGGGCCACGAGGGTTGCTAGGCAACAGCCCCTGGGTGACTTGGTCTTAGGGTCCTGTCCGGCTTGGGGCTGATGAAAGGAGCTGTCCGCGCCCGGGCTCTTCCGAGAAGTGGTTGCTGACAGCCACAAAGTGAAAGGGAGTGAGGCGGCGTGGACGAGTAAGGAGTGACAGTGAGGATTCACATTTGGGTTATTTCAAGATGAGCTTCCTACTGCCCAAGCTGACTAGCAAAAAGGAAGTAGACCAGGCGATAAAAAGTACTGCTGAGAAGGTGTTGGTTCTCAGGTTTGGGAGAGATGAAGATCCT…
>STRG.47286.1
GCTCTGCGCAAGCGCGACCGACCGAGCAGCTCCGAGGAGTCCGCCCGGAAACAAACATTCCCCAGGGCAATGTCACGACTTGGTCTTCCCGAGGAGCCAGTCAGAAACAGTTTGCTAGATGATGCTAAGGCCCGCTTAAGAAAGTATGATATTGGAGGCAAATATTCTCACTTGCCATATAACAAATACTCCGTCCTTTTGCCATTGGTGGCTAAAGAAGGAAAACTCCATTTGTTGTTCACCGTCCGGTCAGAGAAGCTAAGAAGGGCCCCTGGAGAAGTTTGCTTCCCTGGAGGTAAGCGTGACCCTACAGACATGGATGATGCAGCCACAGCTCTCCGGGAAGCCCAGGAGGAAGTGGGTCTCCGTCCTCACCAAGTGGAAGTTGTCTGCTGCCTG…
>STRG.47347.2
GGCTTTGAAGGCGCGGCGAGCGGGAACAGCTCTTGAGGAGTGAGACTGCAGGAGATGTGGGCCGTGCCAAAGAGATGGATGAGACTGTTGCTGAGTTCATCAAGAGGACCATCTTGAAAATCCCCATGAATGAACTGACAACAATCCTGAAGGCCTGGGATTTTTTGTCTGAAAATCAACTGCAGACTGTAAATTTCCGACAGAGAAAGGAATCTGTAGTTCAGCACTTGATCCATCTGTGTGAGGAAAAGCGTGCAAGTATCAGTGATGCTGCCCTGTTAGACATCATTTATATGCAATTTCATCAGCACCAGAAAGTTTGGGAAGTTTTTCAGATGAGTAAAGGACCAGGTGAAGATGTTGACCTTTTTGATATGAAACAATTTAAAAATTCGTTCA…
>STRG.47411.1
GTGAGGGCGCGGCGCGGCAGCAGCTCCGGCGGCCGAGACGGGGGCGGCGGCCGCGCGGGTCTGGCGGGACCGGTTTGGAAGACTTTGCCGGCCTGCAGATTGGCCTTAAGAGAAGGACGGAGCCACATACTGCTGACGGCCCAGAACTGGCAGAGAGAAGGTTGCCATGGCTGCTGTTGACAGTTTCTACCTCTTGTACAGGGAAATCGCCAGGTCTTGCAATTGCTATATGGAAGCTCTAGCTTTGGTTGGAGCCTGGTATACGGCCAGAAAAAGCATCACTGTCATCTGTGACTTTTACAGCCTGATCAGGCTGCATTTTATCCCCCGCCTGGGGAGCAGAGCAGACTTGATCAAGCAGTATGGAAGATGGGCCGTTGTCAGCGGTGCAACAGATGG…
>STRG.47451.1
GCTTTCCGGCGGCGCCGGGCGAGAAGCGCGACTGGAGTCTGGGGCTGCGGCTTCCCAGAGGCGCGAGTCGCTTTTCCAGGAGCCGAGGCCCAAACGGGGCCGGGCCTGAAGGGTCCCCCGCCAGCCCGCGGCCGCGCCATCAATCGCCGCCGCCTCGTCCCGCTTCTCGGCTGAGGCGCCGCGCGGCCAGGCAGCGGGTCCAGGCCTCAGCCGCGCGCCCAGGGGCCTCCGGGGCCCTCCCGGGTCAGCATGCCCGGGGTGAAACTGACCACCCAGGCCTACTGCAAGATGGTGCTGCACGGCGCCAAGTACCCGCACTGCGCCGTCAACGGGCTCCTGGTGGCCGAGAAGCAGAAGCCGCGTAAGGAGCACCTCCCCCTGGGCGGCCCCGGCGCCCAC…
>STRG.47512.3
GCGCAGAGCGGCGGCTTCTCTCGCGAGGACGGACGCCATTATCGCATCTCCCCGACAAACACCACGAGAATTCCGCAGCCCACACGGTGACCAAAAGCCAGCCCCACTGTGAGTTGAACTCTTTCGTGTTGACCGGCCACTCTCCGTGCTCTGGATGATGTCGGAACACGACCTGGCCGATGTGGTTCAGATTGCAGTGGAAGACCTGAGCCCTGACCACCCAGTTGTTTTGGAGAATCATGTAGTGACAGATGAAGACGAACCTGCTTTGAAACGCCAGCGACTAGAAATCAATTGCCAGGATCCATCTATAAAGTCATTCCTGTATTCCATCAACCAGACAATCTGCTTGCGGTTGGATAGCATTGAAGCCAAATTGCAAGCCCTGGAGGCTACTTG…
>STRG.47525.1
AGTGCGCGCCTAGCAGTGTCCCAGCCGGGTTCGTGTCGCCATGGGGCAGATCGAGTGGGCCATGTGGGCCAACGAACAGGCGCTGGCGTCCGGCCTGATCCTCATCACCGGGGGCATCGTGGCCACAGCTGGGCGCTTCACCCAGTGGTACTTTGGTGCCTACTCCATTGTGGCGGGCGTGTTTGTGTGCCTGCTGGAGTACCCCCGGGGGAAGAGGAAGAAGGGCTCCACCATGGAGCGCTGGGGACAGAAGTACATGACCGCCGTGGTGAAGCTGTTCGGGCCCTTTACCAGGAATTACTATGTTCGGGCCGTCCTGCATCTCCTGCTCTCGGTGCCCGCCGGCTTCCTGCTGGCCACCATCCTTGGGACCGCCTGCCTGGCCATTGCGAGCGGCAT…
>STRG.47531.2
ACAGTCTGCGACGGGACCCGGCGTGCCCATGTGTCAGGTGGGCGAGGACTACGGGGAGCCGGCGCCTGAGGAGCCGCCCCCGGCGCCGCGGCCCAGCCGTGAGCAGAAGTGTGTGAAGTGCAAGGAAGCGCAGCCCGTTGTGGTGATACGAGCCGGAGATGCCTTCTGCAGGGACTGTTTCAAGGCCTTCTACGTCCACAAGTTCAGAGCCATGCTGGGCAAGAACCGGCTCATCTTTCCAGGCGAGAAGGTGCTCTTGGCGTGGTCTGGGGGGCCTTCGTCCAGCTCCATGGTCTGGCAGGTTCTTGAGGGCCTGAGCCAAGATTCTGCCAAAAGACTGCGCTTTGTGGCAGGAGTCATCTTTGTTGACGAGGGAGCAGCCTGTGGCCAGAGCCTAGA…
>STRG.47542.4
GTGCCTGGCGCCGAGCCTCCCAAGATGGCGGTGTGCATCGCGGTGATTGCCAAGGAGAATTACCCCCTCTACATTCGCAGCACCCCTACGGAGAACGAGCTGAAGTTCCACTACATGGTGCACACATCTCTGGACGTGGTGGATGAGAAGATCTCCGCAATGGGGAAGGCCCTGGTCGACCAGAGGGAGCTGTACCTGGGCCTGCTCTACCCCACGGAGGACTACAAGGTATACGGCTACGTCACCAACTCCAAGGTGAAGTTTGTCATGGTGGTAGATTCCTCCAACACAGCCCTTCGAGACAACGAAATTCGCAGCATGTTCCGGAAGCTACACAACTCCTACACAGACGTGATGTGCAACCCCTTCTACAACCCGGGGGACCGCATCCAGTCCAGG…
>STRG.47718.1
CTGTCTTTTTAGTACCACATGCGCAGGCAGGTGATGGCGGCGCTGGTCGTATCCGGGGCAGCGGAGCAGGGCGGCCGAGACGGCCCTGGCAGAGGTCGGGCCCCTCGGGGCCGCGTGGCCAATCAGATCCCCCCTGAGATCCTGAAGAACCCTCAGCTGCAGGCAGCAATCCGGGTCCTGCCTTCCAACTACAACTTTGAGATCCCCAAGACCATCTGGAGGATCCAACAAGCCCAGGCCAAGAAGGTGGCCTTGCAAATGCCGGAAGGCCTCCTCCTCTTTGCCTGTACCATTGTGGATATCTTGGAAAGGTTCACGGAGGCCGAAGTGATGGTGATGGGTGACGTGACCTACGGGGCTTGCTGTGTGGATGACTTCACAGCGAGGGCCCTGGGAGCT…
>STRG.47845.6
AAAGGGCAAGGGATTTCTGGTTCCTTAAGAGATCAACTGTCTACACTCACTCACACCTCCTGTCCTGCAGCCATGGCCATGCAGAAAATCTTTGCCCGGGAAATCTTGGACTCCAGGGGCAACCCCACGGTGGAGGTGGACCTGCACACGGCCAAGGGCCGATTCCGAGCAGCTGTGCCCAGTGGGGCTTCCACGGGTATCTATGAGGCTCTGGAACTAAGAGACGGAGACAAAGGCCGCTACCTGGGGAAAGGAGTCCTGAAGGCTGTGGAGAACATCAACAATACTCTGGGCCCTGCTCTGCTGCAAAAGAAACTAAGCGTTGTGGATCAAGAAAAAGTTGACAAATTTATGATTGAGCTAGATGGGACCGAGAATAAGTCCAAGTTTGGGGCCAAT…
>STRG.47618.3
GTGCTGCGGCTGTGCTCGGCCTTAGTGGTGTCGGGGTCTAGTGGACAGAGAAGACTCTTGGCCAGGCAGATGGCTTCTCGGTGGCAGAACATGGGGACCTCCGTGCGCCGGAGATCTCTCCAGCACCAGGAGCAGCTGGAGGACAGCAAGGAGCTGCAGCCTGTGGTCAGCCATCAGGAGACCTCTGTAGGGGCCCTGGGGTCCCTGTGCAGACAGTTCCAAAGGAGGCTGCCCCTGAGAGCCGTCAACCTCAACCTCCGCGCAGGGCCCTCCTGGAAACGCCTGGAAACCCCAGAGCCAGGTCAGCAGGGCCTCCAGGCTGCAGCTCGCTCAGCTAAGAGTGCTTTGGGTGCCGTGTCCCAGAGAATCCAGGAGTCCTGCCAAAGTGGCACCAAGTGG…
>STRG.47930.1
GCAAATTCGTGGATCGCTCCGCTGAATCCGCCCGCGCGTCGCCGCCGTCGTCGCCGCCCCCCGTCCCGGCCCCCCTGGGTTCCCTCAGCCCAGCCCTGTCCAGCCCGGTTCCCGGGAGGATGAAGTTCGTGTACAAAGAAGAGCATCCGTTCGAGAAGCGCCGCTCTGAGGGCGAGAAGATCCGAAAGAAATACCCGGACCGGGTGCCGGTGATAGTAGAAAAGGCTCCCAAAGCTCGGATAGGAGACCTGGACAAAAAGAAATACCTGGTGCCTTCTGATCTCACAGTTGGTCAGTTCTACTTCTTGATCCGGAAGCGAATTCATCTCCGAGCTGAGGATGCCTTGTTTTTCTTTGTCAACAATGTCATTCCACCCACCAGTGCCACAATGGGTCAGC…
>STRG.47937.5
GTACTAAGACCCGTGTGCAGCAGCGGCGGCGGCGGTAGAGGCGGCGGCGGCGGCGGCAGCGGGCTCGGAGGCAGCGGTTGGGCTCGCGGCGAGCGGACGGGGTCGAGTCAGTGCGTTCGCGCGAGTTGGAATCGAAGCCTCTTAAAATGGCAGATGACTTGGACTTCGAGACAGGAGATGCAGGGGCCTCAGCCACCTTCCCAATGCAGTGCTCAGCATTACGTAAGAATGGCTTTGTGGTGCTCAAAGGCCGGCCATGTAAGATCGTCGAGATGTCTACTTCGAAGACTGGCAAGCACGGCCACGCCAAGGTCCATCTGGTTGGTATTGACATCTTTACTGGGAAGAAATATGAAGATATCTGCCCGTCAACTCATAATATGGATGTCCCCAACATCA…
>STRG.47975.4
AGCTTTGCAATATGGCGGCCGAGGCGGACGGACCGCTTAAACGGCTGCTCGTGCCGATTCTTTTACCTGAGAAATGCTACGACCAACTTTTCGTTCAGTGGGACTTGCTTCACGTCCCCTGCCTCAAGATTCTCCTCAGCAAAGGCCTGGGGCTGGGCATTGTGGCTGGCTCACTTCTAGTAAAGCTGCCCCAGGTGTTTAAAATCCTGGGAGCCAAGAGTGCTGAAGGGTTGAGTCTCCAGTCTGTAATGCTGGAGCTAGTGGCATTGACTGGGACCATGGTCTACAGCATCACTAACAACTTCCCATTCAGCTCTTGGGGTGAAGCCTTATTCCTGATGCTCCAGACGATCACCATCTGCTTCCTGGTCATGCACTACAGAGGACAGACTGTGAAAG…
>STRG.48107.1
ATGCGGAGCGGCTAGGTGGTGCACGGGAAACGCGGGCGTAGGTGACCGGCGGCTTTCTCAGTTTTGGTGGAGACGGGCGCATGTGGGCGCTTTGCTCGCTGCTGCGGTCCGCGGCCGGACGCACCATGTCGCAGGGACGCACCATATCGCAGGCACCCGCCCGCCGCGAGCGGCCGCGCAAGGACCCGCTGCGGCACCTGCGCACGCGAGAGAAGCGCGGACCGTCGGGGTGCTCCGGCGGCCCAAACACCGTGTACCTGCAGGTGGTGGCAGCGGGTAGCCGGGACTCGGGCGCCGCGCTCTACGTCTTCTCCGAGTTCAACCGGTATCTCTTCAACTGTGGAGAAGGCGTTCAGAGACTCATGCAGGAGCACAAGTTAAAGGTTGCTCGCCTGGACA…
>STRG.48114.1
GCCAGCGGCGGCCCAGGAGGCAGCCGGTGAGCGCCTGCGAGCAGAGTGGCGGGGGCCGCTGACAGGTCCCGCGCAGCCCAGCCCAGCCCAGCCACGCGGCTCACAGGTGGGGTCCAAGAGCAGTTTGGAGCAACCCGGCGCTACGGAGAGGGGTGGACGGCTCTGCACGGGCCTCCTGTCTCCCGCTCGGGCAGAGGGACTCGGGGGGACCTCGCTCCTTGGCTGAGAGAACCTGAACTCGGGCGGAGAGAACGCGCCCAGGCGGGCAAGGGGACCAGAGAAAGCCGGGGCTGGAAGTCACTGTCGCTCGCCACTGTCTGGAGCGCACGGAGCGCAGAGGCCCGGCAGCCGCGCGTGCCCTCACGGGGACCGAGCCAGTGATGCAGGATCGCTGAGCGG…
>STRG.48283.2
GCTTTTGGCGACCCGACCTCTGGCTAACCTACCCCCGGAGCCATGGCCTCTGCTGGGGTGGCAGCCGGGCGACAGGCGGAGGATGTATTGCCGCCAACGTCCGACCAGCCGCTGCCTGACACCAAGCCGCTGCCGCCTCCTCAGCCGCCGCCGGTCCCTGCGCCTCAACCGCAGCAGTCGCCGGCGCCACGGCCTCAGTCACCTGCCCGCGCGAGGGAGGAAGAGAACTACTCCTTTTTACCTTTGGTTCACAACATCATCAAATGCATGGACAAGGACAGCCCGGAGGTCCACCAGGACCTGAACGCCCTCAAAAGCAAGTTCCAGGAGATGCGCAAGCTCATCAGCACCATGCCCGGCATCCACCTGAGCCCCGAACAGCAGCAGCAGCAGCTGCAG…
>STRG.48311.2
ACTCTGTCGCCGCCGTCAGACCGGAATTGCCGGTGCCGCCGCCACCGCTGTCTGTGCGCCCACCTCTGCTGCTACCATGGGGATCTTAGAGAAGATCTCGGAGATCGAGAAGGAGATCGCTCGGACACAGAAGAACAAGGCCACTGAGTATCATCTGGGCCTGCTGAAAGCTAAGCTCGCCAAGTATCGGGCCCAGCTCCTGGAACCGTCCAAATCGGCCTCGTCCAAAGGAGAGGGCTTTGATGTCATGAAGTCGGGTGATGCCCGTGTGGCGCTGATTGGATTTCCCTCTGTGGGTAAGTCCACATTCTTGAGTCTGATGACCTCCACGGCCAGCGAGGCAGCGTCCTATGAGTTCACCACTCTGACGTGTATTCCTGGGGTCATTGAATACAAAGG…
>STRG.48354.7
TTTCTCTGGAGGAGCTCCGCGCGTGGCGAGTCTGTGTCCTCCCTGTCCCCCAGAGCAGAGAACCCTCTCTGTGTCTGGACGGGGGAGGAGCAGACGCTGGACAGGGTGTGTGTGTTCAGCAGTGGATTGTCAGACTTGGGGTCCCGGCTGCTCCCTTTTGGGTCTCTCCCCGGGCCCGCTGATCTGACTGTAATTCCTTCTGCTGGAGCTAGGGTTCGGCCACCTTGACGCGCCCCCTCTGCCCCCGGAGCGTGTCTTTGGGTTTTGTGTGTGTGGGAGTGGGGTGTATGTGTGTTTCTTATCCGAGACACCTCCGGGTCGTTTGCTTGGAAACCGGCTGAGGGCCCGCACAGCCTGGAGCATTTGGTTGGAAAGTGAGGCAGGTAGCGCCCAAGGCTC…
>STRG.48359.2
CTTACAGTGGTCCCTGCTGGCCCTTGGTGACGGGTCGCCTCAGTTCCGACCCGGACCCGTACGCTGCTGCGCTGACGTGGCTCCCGGAAGTAGGGCTGGCGTAGGGCCGCCATGTTGCAGCAGGATAGTAATGATGACACTGAAGATGTTTCACTGTTTGATGCGGAAGAGGAGACGACTAATAGACCAAGAAAAGCCAAAATCAGACATCCAGTAGCATCGTTTTTCCACTTATTCTTTCGAGTCAGTGCAATCATCGTCTATCTTCTCTGTGGGTTGCTCAGCAGCAGCTTTATTACCTGTATGGTGACAATTATCTTGTTGTTGTCGTGTGACTTTTGGGCAGTGAAGAATGTCACAGGTAGACTAATGGTTGGCCTACGTTGGTGGAATCACATT…
>STRG.48388.1
AAGGCTATACTTTCAGGGATCATTTCTATAGTGTGTTACTAGAGAAGTTTCTTTGAACGTGTAGAGCACCGAAAACCCCGAGGAAGAGAGGTAGCGTTTTCTCCTGAGCGTGAAGCCGGCTTTCTGGCGTTGCTTGGCTGCAACTGCCGTCAGCCATTGATGATCGTTCTTCTCTCCGTATTGGGGAGTGAGAGGGAGAGAACGCGGTCTGAGTGGTTTTTCCTTCTTGATGGCTCAATGACAGAGACTAGCTCGTAAACTCCGGGCCGTTTCCGGGCTGTTCGCTCCTGCTTGGCAATGTCGCGAGAAAGGTTTTCGCCTCCTGTTTCAGCGGTGACGGCTCTTGGGTTTTCTCGGGGTGGCTTTTTAATTTTAGTCTTGGCGCGAGGCGGGGGATGC…
>STRG.48428.10
TCAGCGGGCGTGGAGGTCGCGGCTGAGCGAGCGAGCCCTGGGCGAGTGAATTGTGGCTGTGGGTTGACGGTGGAGACACCCCCCGGAGGGAGGCGGAGGGAAGGGAGGCGAGGCCTGCACCTGCATGCTTCCCGCCTCCCACTCCCCAGCGCCCCCGGACCGTGCAGTTCTCTGCAGGACCAGGCCATGGAGCTCGAAGTCCGGCGGGTCCGACAGGCGTTCCTGTCCGGCCGGTCGCGACCTCTGCGGTTTCGGCTGCAGCAGCTGGAGGCCCTGCGGAGGATGGTGCAGGAGCGCGAGAAGGATATCCTGACGGCCATCGCCGCCGACCTGTGCAAGAGTGAATTCAATGTGTACAGTCAGGAAGTCATTACTGTCCTTGGGGAAATTGATTTTATG…
>STRG.48591.1
GAAGATTTGGGGCTCCGCGATACAGTTAGGATGGCTGTAGTACCTCTGCTGTTGTTGGGGGGTTTGTGGAGCGCTGTGGGAGCGTCCAGCCTGGGTGTCGTTACTTGCGGCTCCGTGGTGAAGCTACTCAATACGCGCCACAACGTCCGACTGCACTCACACGACGTGCGCTATGGGTCAGGTAGTGGGCAGCAGTCAGTGACAGGTGTAACCTCTGTGGATGACAGCAACAGTTACTGGAGGATACGGGGGAAGAGTGCCACAGTGTGTGAGAGGGGAACCCCCATCAAGTGTGGCCAGCCCATCCGGCTGACACATGTCAACACTGGCCGAAACCTCCATAGTCACCACTTCACTTCACCTCTTTCTGGAAACCAGGAAGTGAGTGCTTTTGGTGAG…
>STRG.48596.1
ACAGCGTTGGCGGAGCCCGAGCGGAGTGGGACTCGAGGCCCTGTAGCCGGACTGGGCCCCTCGCCCCCTCCTCCAGCGGCCTGCGGGCCTTGGCAGCGCCGCCCCTGCCCACACTGACCCCGTGTGGCGGGGCCGCTCCGCGCCCCCGGGCCGCTCTGTAATGGTAGGGCAGCCTCAGCCCCGAGATGACGTCGGGTCTCCGCGGCCCCGGGTTATTGTAGGAACCATCCGGCCCCGCGTAATCGTAGGAACTATCCGGCCCCGCGTAATCGTAGGGTCTGCGCGGGCCCGGCCCCCACCAGACGGGACTCCCCGCCCCCAATTGGCGGCCGAAGAGTCTCCTCGCCCCAGAGTCATCTTCGGGACGCCCAGGGCCCGGGTGATTTTGGGCTCGCCGCG…
>STRG.48604.1
AGTCGGCGCCGCCCGGAGCCGGGAGCGCCGCTCCAGCGAGGCGCGGGCTGTGGGGCCGCCGCGTGCCTGGCCCCGCTCGCCCGTGCCGGCCGCTCGCCCGCCATGCCTGGCTTCGACTACAAGTTCCTGGAGAAGCCCAAGCGACGGCTGCTGTGCCCACTGTGCGGGAAGCCCATGCGCGAGCCTGTGCAGGTTTCCACCTGCGGCCACCGTTTCTGCGATACCTGCCTGCAGGAGTTCCTCAGTGAAGGAGTCTTCAAGTGCCCTGAGGACCAGCTTCCTCTGGACTATGCCAAGATCTACCCAGACCCGGAGCTGGAAGTACAAGTATTGGGCCTGCCTATCCGCTGCATCCACAGTGAGGAGGGCTGCCGCTGGAGTGGGCCACTACGTCATCTA…
>STRG.48616.1
CGCCTCCGCCTTCGGAGGCTGACGCGCCCGGGCGCCGTTCCAGGCCTGTGCAGGGCGGATCGGCAGCCGCCTGGCGGCGATCCAGGGCGGTGCGGGGCCTGGGCGGGAGCCGGGAGGCGCGGCCGGCATGGAGGCGCTGCTGCTGGGCGCGGGGTTGCTGCTGGGCGCTTACGTGCTTGTCTACTACAACCTGGTGAAGGCCCCGCCGTGCGGCGGCATGGGCAACCTGCGGGGCCGCACGGCCGTGGTCACGGGTGAGTGCGGAGGCGGGTGAGTGCGAGCTGGCGGGGCGCGCGGAGAGGAGGCCGGGCCGGCGGTAGCAGCGGCCCGCCGGGCTCAGCTCAGCTCGGCTCCCGCCCGCGGTCCGCAGGCGCCAACAGCGGCATCGGAAAGATGACG…
>STRG.48725.3
GCCGCCTGTTGGCCATGGCGGGCCTGGGCCTGGGCTCCGCCGTTCCCGTGTGGCTGGCCGAGGACGACCTCGGCTGCATCATCTGCCAGGGGCTGCTGGACTGGCCCGCCACGCTGCCCTGCGGCCACAGCTTCTGCCGCCACTGCCTGGAGGCCCTGTGGGGCGCCCGCGACGCCCGCCGCTGGGCCTGCCCCACTTGCCGCCAGGGCGCCGCGCAGCAGCCGCACCTGCGGAAGAACACGCTACTGCAGGACCTGGCCGACAAGTACCGCCGCGCCGCACGCGAGATACAGGCGGGCTCCGACCCTGCCCACTGCCCCTGCCCGGGCTCCAGTTCCCTCTCCAGCGCGGCCGCGAGGCCCCGGCGCCGCCCGGAACTGCAGCGGGTGGCAGTAGAGA…
>STRG.48886.1
CTTCTTCCACTCCCCGCGGCGCGAGCGGCTGACTGCCCGTAGAGGAAACGACATTCGGAGCTGCGCTCCCGCCCACGCCGGCCCTGACGCGGGCCTCGTCAGCCAGTAACAGGGAGCAGAGGTGGGAGTTAGCGAGGCGACCACGAAAACGGTGAAGGTCGGAACCGACAGCCTCCTCCGAGAAGGGCAGGAGCTGGGAGGAGGCGGCAGCGGCGGCGGCAGAAACAGCAGCGGCGGCGGCGGCGGCAGCTGGGAGGAGGTGGTGACGGTGGCAACGGCAGCGTCGGGGACGATGGCGCGACTCGTGGCAGTGTGCAGGGACGGGGAGGAGGAGTTCCCCTTCGAGAGGAGGCAGATTCCCCTCTACATAGACGACACCCTGACGGTGAGCGGGCCGGG…
>STRG.48976.1
AGCAGTGAGAGCGGTTGCGCAGTGAAGGCTAGACCCGGTTTACTGGAATTGCTCTGGCGATCGAGGGATCCTAGTACACCGCAATCATGTCTATTATGTCCTATAACGGAGGGGCCGTCATGGCCATGAAGGGGAAGAACTGTGTGGCCATCGCTGCAGACAGGCGCTTCGGGATCCAGGCCCAGATGGTGACCACGGACTTCCAGAAGATCTTTCCCATGGGTGACCGGCTGTACATCGGTCTGGCCGGGCTCGCCACTGACGTCCAGACAGTTGCCCAGCGCCTCAAGTTCCGGCTGAACCTGTATGAGTTGAAGGAAGGTCGGCAGATCAAACCTTATACCCTCATGAGCATGGTGGCCAACCTCTTGTATGAGAAACGGTTTGGCCCTTACTACA…
>STRG.49031.2
CTTCTTCCGCTCTGAGGCGCTACTGAGGCCGCGGAGCCGGACTGCGGTTGGGGCGGGAAGAGCCGGGGCCGTGGCTGACATGGAGCAGCCCTGCTGCTGAGGCCGCGCCCTCCCCGCCCTGAGGTGGGGGCCCACCAGGATGAGCAAGCTGCCCAGGGAGCTGACCCGAGACTTGGAGCGCAGCCTGCCTGCCGTGGCCTCCCTGGGCTCCTCACTGTCCCACAGCCAGAGCCTCTCCTCGCACCTCCTTCCGCCGCCTGAGAAGCGAAGGGCCATCTCTGATGTCCGCCGCACCTTCTGTCTCTTCGTCACCTTCGACCTGCTCTTCATCTCCCTGCTCTGGATCATCGAACTGAATACCAACACAGGCATCCGTAAGAACTTGGAGCAGGAGATCAT…
>STRG.49173.2
CTGGCCGTCGCGGGACCCGCAGGACTGAGACCATGGAGGCGGTGGCGGTGGCCGCGGCGGTGGGGGTCCTTCTCCTGGCCGGGGCCGGGGGCGCGGCAGGCGACGAGGCCCGGGAGGCGGCGGCCGTGCGGGCGCTCGTGGCCCGGCTGCTGGGGCCAGGCCCCGCGGCCGACTTCTCCGTGTCGGTGGAGCGCGCTCTGGCTGCCAAGCCGGGCTTGGACACCTACAGCCTGGGCGGCGGCGGCGCGGCGCGCGTGCGGGTGCGCGGCTCCACGGGCGTGGCGGCCGCCGCGGGGCTGCACCGCTACCTGCGCGACTTCTGTGGCTGCCACGTGGCCTGGTCCGGCTCTCAGCTGCGCCTGCCGCGGCCACTGCCAGCCGTGCCGGGGGAGCTGACCG…
>STRG.49204.1
AGCTTCCGGGTTTCCTGGGCTACTACGATGGCGATGAGTTTCGAGTGGCCGTGGCAGTATCGCTTCCCACCCTTCTTTACGTTACAACCGAATGTGGACACTCGGCAGAAGCAGCTGGCCGCCTGGTGCTCGCTGGTCCTGTCCTTCTGCCGCCTGCACAAACAGTCCAGCATGACGGTGATGGAAGCTCAGGAGAGCCCGCTCTTCAACAACGTCAAGCTACAGCGAAAGCTTCCTGTGGAGTCGATCCAGATTGTATTAGAGGAACTGAGGAAGAAAGGGAACCTCGAGTGGTTGGATAAGAGCAAGTCCAGCTTCCTGATCATGTGGCGGAGGCCAGAAGAATGGGGGAAACTCATCTATCAGTGGGTTTCCAGGAGTGGCCAGAACAACTCCGTC…
>STRG.49228.1
GCGGGCCCGCGAGATGCCGGTGTTGGCGGCCCGAGCGGCTGCAGTTGCAGGGGCGGGGGAGGCGGCGGCGGGGCCCGGGAGAGGGGTGGCGTGGGGGACCGGCGCGTAGCCGGGACCATGGAGGGGCAGAGCGGCCGCTGCAAGATCGTGGTGGTGGGAGACGCAGAGTGCGGCAAGACGGCGCTGCTGCAGGTGTTCGCCAAGGACGCCTATCCCGGGAGTTATGTCCCCACCGTGTTTGAGAACTACACTGCGAGCTTTGAGATCGACAAGCGCCGCATTGAGCTCAACATGTGGGACACTTCAGGTTCCTCTTACTATGATAATGTCCGGCCTCTGGCCTATCCTGATTCTGATGCTGTGCTCATCTGCTTCGACATTAGCCGACCAGAAACACTG…
>STRG.49247.1
ATCGCTTCTCGGCCTTTTGGCTAAGATCAAGTGTAGTATCTGTTCTTATCAGTTTAATATCTGATACGTCCTCTATCCGAGGACAATATATTAAATGGATTTTTGGAGCAGGGAGATGGAATAGGAGCTTGCTCCGTCCACTCCACGCATCGACCTGGTATTGCAGTACCTCCAGGAACGGTGCACCCCCT
>STRG.49264.1
ATCGCTTCTCGGCCTTTTGGCTAAGATCAAGTGTAGTATCTGTTCTTATCAGTTTAATATCTGATACGTCCTCTATCCGAGGACAATATATTAAATGGATTTTTGGAGCAGGGAGATGGAATAGGAGCTTGCTCCGTCCACTCCACGCATCGACCTGGTATTGCAGTACTTCCAGGAACGGTGCACCCCCT
>STRG.49450.4
GGCGGTTGCACGCCTGCGCGAGGGCGGGCGGCGGGGGCGCGCGCGCGGCGGGGGCGGGCTTTGCCGAGCGCAGAGCTGCAGCCGCCGAGCCGGACGTGTCCGCGAAGATGGCGGGCCGGAGCATGCAAGCGGCAAGATGTCCTACAGATGAATTATCTTTAACCAATTGTGCAGTTGTGAATGAAAAGGATTTCCAGTCTGGCCAGCATGTGATTGTGAGGACCTCTCCCAATCACAGGTACACATTTACACTGAAGACACATCCATCGGTGGTTCCAGGGAGCATTGCATTCAGTTTACCTCAGAGAAAATGGGCTGGGCTTTCTATTGGGCAAGAAATAGAAGTCTCCTTATATACATTTGACAAAGCCAAACAGTGTATTGGCACAATGACCATCG…
>STRG.49502.2
ACATTGCGCCCTAAGTCCAGTCTCGCCCAGGTGTGGCAGGAGCTTTTACCTGCTCTTCGGCAGTAGCCGGCTGCCACTCAACCCCATGCCTGGTGAGTGGAAAGCCATCAACCTTTTATTTAGTCCCTCTCTCGTTGTCGCCTGGGGAGGGGCGACTTTGTACAGTGAGGCACTGGGGTCCGGCACCATAGTGGGAGTTGGGGTTGTTTACGCGACACTTCTAAGGGGATTTTCACAATCGGTTAAGCCCCCGTTAATCCTCACATGGTTATTGCGGCGACCCCCATAGCCCACGGTCCCAAACGTGTGCATCTGAATCATCCGAAGCTCTTTCTAAAGGCAGGCTCCCCTGGCCGCCTCTCCTAATCCGACTCGGTACTTCACGGGGCGTGCCTAGAA…
>STRG.49618.1
GACGCCCCGGCTGGTGTGTGTCGGTGTGTATGTGTGTGTGTGAGTGTGCGCGCTCCGAGTGTGTGTGTATTTGTGTATCGGCGGTCCCGCAGGTCCCGGATGTTGCGGACAGTATGAGGCAAGCGCAGGGGGACGGGGACCAGCAGCTGTCGCCGCCGCTCTCAGGGTGAAGAGGGAACAGAAATCTTTGCCCCCTGACTTTGGAAATCTCGTTTAACCTTCAAACTGGCGATGTCAAGGGTTCCAAGTCCTCCACCTCCGGCAGAAATGTCGAGTGGCCCCGTAGCTGAGAGTTGGTGCTACACACAGATCAAGGTAGTGAAATTCTCCTACATGTGGACCATCAATAACTTTAGCTTTTGCCGGGAGGAAATGGGTGAAGTCATTAAAAGTTCTACA…
>STRG.49621.1
AGCTCCTATGAGGCCCCTGCCGCCGGTCGGCGATGTCCGGCTGGAGCTGTCGCCTCCGCCGCCGCTGCTGCCGGTGCCGGTTGTGAGCGGGTCTCCAGTCGGCTCCTCTGGGCGTCTCATGGCCTCTAGCAGCTCCCTGGTGCCCGACCGGCTGCGCCTGCCGCTCTGCTTCCTGGGTGTCTTTGTCTGCTATTTTTACTATGGGATCCTGCAGGAAAAGATAACAAGAGGAAAGTATGGGGAAGGAGCCAAGCAGGAGACGTTCACCTTTGCCTTAACTTTGGTCTTCATTCAATGTGTGATCAATGCTGTGTTTGCCAAGATCTTGATCCAGTTTTTTGACACTGCCAGGGTGGATCGTACCCGGAGCTGGCTCTATGCTGCCTGTTCTATCTCCTA…
>STRG.49659.1
ACTTTAAAAGTTTACTCGGGCCGGGACGCAGGGCAAAGCGAGCCATGGCTGTCTACGTCGGGATGCTGCGCCTGGGGAGGCTGTGCGCCGGGAGCTCGGGGGTGCTGGGGGCCCGGGCCGCCCTCTCTCGGAGTTGGCAGGAAGCCAGGTTGCAGGGTGTCCGCTTCCTCAGTTCCAGAGAGGTGGATCGCATGGTCTCCACGCCCATCGGAGGCCTCAGCTACGTTCAGGGGTGCACCAAAAAGCATCTTAACAGCAAGACTGTGGGCCAGTGCCTGGAGACCACAGCACAGAGGGTCCCAGAACGAGAGGCCTTGGTCGTCCTCCATGAAGACGTCAGGTTGACCTTTGCCCAACTCAAGGAGGAGGTGGACAAAGCTGCTTCTGGCCTCCTGAGCA…
>STRG.49719.1
ACTCCGACCCTACCCGGCCGAAGGGTTCCGCTGGACACGCAGGCGGCCTCCGGAGCAGCCCAAGCCCATGAGGGCCGCGCGCCCGGCCGCCGGTGCTGACGAGACGGAGCTCCTGGCCCCCGAGGAGGAGCAGAGGATCAATGCGGTTCAAGAATCGATTCCAGCGGTTCATGAACCATCGAGCTCCAGCCAATGGCCGCTACAAGCCAACTTGCTATGAACATGCTGCTAACTGTTACACACACGCATTCCTCATTGTTCCGGCCATCGTGGGCAGTGCCCTCCTCCATCGGCTGTCTGATGACTGCTGGGAAAAGATAACAGCATGGATTTATGGAATGGGACTCTGTGCCCTCTTCATCGTTTCTACAGTATTTCACATTGTATCATGGAAAAAGA…
>STRG.49772.1
CTAAGGGTGTCCGCGGCCTGCCCTCCAGGCGGAGGAGCCCGGACTGCGGAAGGATGGAGCTGGCCGCCGGAAGCTTCTCGGAGGAGCAGTTCTGGGAGGCCTGCGCCGAGCTCCAGCAGCCCGCTCTGGCCGGGGCCGACTGGCAGCTCCTAGTGGAGACCTCGGGCATCAGCATCTACCGGCTGCTGGACAAGAAGACTGGACTTTATGAGTATAAAGTCTTTGGTGTTCTGGAGGACTGCTCACCAACTCTACTGGCAGACATCTATATGGACTCAGATTACAGAAAACAATGGGACCAGTATGTTAAAGAACTCTATGAACAAGAATGCAACGGAGAGACTGTGGTCTACTGGGAAGTGAAGTACCCTTTTCCCATGTCCAACAGAGACTATGTCT…
>STRG.49885.3
AGAGAACGCTCTGCACTATGGCTGGTCCCGTGAGCTTGCGAGACCTTCTAATGGGAGCATCAGCCTGGATGGGCTCTGAAAGTCCCGGAGGGTCCCCTACTGAGGGCGGAGGGAGCGCGGCTGGCGGACCGGAGCCTCCATGGCGGGAGGATGAGATCTGCGTTGTGGGAATCTTCGGCAAGACGGCTCTACGCCTGAATTCCGAGAAGTTCTCTCTTGTGAATACGGTGTGCGACCGACAGGTCTTTCCTCTCTTTCGCCACCAAGATCCTGGGGATCCAGGACCTGGAATCAGAACTGAGGCTGGCGCCGTGGGTGAGGCCGGTGGAGCCGAGGACCCTGGGGCTGCAGCCGGGGGTTCAGTTCGGGGAAGTGGAGCTGTCGCGGAAGGTAACCGAA…
>STRG.49887.1
GAGCCGACCTCGAGCAGCCGCCGCCGCCGCCGTCGTTGCTACTGCCGCAGCGGAGTTCAGAGGGCCCGGAGGTGGGAGACTTCCCACACGGTGACTGAGATGTCGTCCACTGCGGCTTTTTACCTTCTCTCTACGCTAGGAGGATACTTGGTGACCTCATTCTTGTTGCTTAAATACCCGACCTTGCTGCACCAGAGAAAGAAGCAGCGATTCCTCAGTAAACACATCTCTCACCGCGGAGGTGCTGGAGAAAATTTGGAGAATACAATGGCAGCCTTTCAGCATGCGGTTAAAATCGGAACTGATATGCTAGAATTGGACTGCCATATCACAAAAGATGAACAAGTTGTAGTGTCACATGATGAGAATCTAAAGAGAGCAACTGGGGTCAATGTAAAC…
>STRG.49755.1
GGTGTCATGGCCGGCTCCTACCCTGAAGGTGCACCTGCAGTCCTCGCCGATAAGAGGCAGCAGTTCGGAAGCCGGTTCCTGAGAGATCCGGCGCGCGTCTTCCACCACAATGCCTGGGACAATGTGGAGTGGTCGGAAGAGCAAGCCGCGGCGGCGGAGAGAAAAGTCCAGGAGAACAGTATCCAGCGGGTGTGCCAGGAGAAACAAGTTGATTATGAGATCAATGCCCACAAATACTGGAATGACTTCTACAAAATCCACGAAAATGGGTTTTTCAAGGATAGACATTGGCTTTTTACCGAATTCCCTGAGCTGGCACCTAGCCAAAATCAAAATCATTTGAAGGACTGGTTCTTGGAGAACAAGAGTGAAGTACCTGAATGTAGAAACAATGAGGAT…
>STRG.50000.1
AGTCCCGGGTGCCGCGGGGACAGTGTAGGGTCATTAGCTGTTGAGCCGCCCCGGGCGGGCCCAAGCCTTTGGATCTCAGGTGACCGGCACAGGCGGCCGCGGGGTCCGGAACTGCTTGTTCCGGCAGTGGAAGAGACGCGCCGGCGTTGGCCGCTGCTGCTAGCAGCTTGAACCCCAGGGTCGGGACCGATGTCGGCTTGGGCTGCTGCCAGCCTAAGCAGGGCCGCTGCCCGATGCTTGCTGGCACGAGGCCCCGGGGTCAGGGCGGCTCCTCCGCGCGACCCCCGGCCCTCCCACCCCGAGCCCCGGGGCTGCGGTGCCGCTCCGGGCAGGACGCTGCACTTTACCGCGGCTGTCCCCGCCGGGCACAACAAGTGGTCCAAAGTCAGGCACATCAAG…
>STRG.50174.2
ACACGGTCTTTGAGCTGAGTCGAGGTGGACCCTTTGAACGCAGTCGCCCTACAGCCGCTGATTCCCCCCGCATCGCCTCCCGTGGAAGCCCAGGCCCGCTTCGCAGCTTTCTCCCTTTGTCTCATAACCATGTCCACCAACGAGAATGCTAATACACCAGCTGCCCGTCTTCACAGATTCAAGAACAAGGGAAAAGACAGTACAGAAATGAGGCGTCGCAGAATAGAGGTCAATGTGGAGCTGAGGAAAGCTAAGAAGGATGACCAGATGCTGAAGAGGAGAAATGTAAGCTCATTTCCTGATGATGCTACTTCTCCGCTGCAGGAAAACCGCAACAACCAGGGCACTGTAAATTGGTCTGTTGATGACATTGTCAAAGGCATAAATAGCAGCAATGTG…
>STRG.50179.1
CGGAGCGGGCACCGGCACTGAGGGAAGGTGTGAGCTGCCGCCGAGGGTCCCAGGCGGAACGCGGGAAGGGAGCAGGCAAGGAGCAAAGTGGCGGCGGGAGCGGCAGCTGTGACCCCTGGAGGGGTTTAGTGTCCGGTCCACTCAAGGGAGAGTTTTAGACCAAGCAGGGCCGACTGCATTTATTAGACGCCCACAGCATGCAGGGCGCTCCAAGAGGCTGGGGCGAGGAAAATTAGAACCAAGTCTGCTACCCGCCGGGAACTTGTCGTATTTCTGGCGAGGGAAGAGACAGCATTCCCACGCCGATGGTTCCAGCAAAGCCCCAGGAGTGCTGTTCCTGGTCTTGTAGTTGACGCCTCCATCCGGGACTCACCTGGTGGAGAAAATCGGGTTACCTGC…
>STRG.50180.4
ATGTCTAACCTCGGAGGCCGTAGGAACGGGCCTGTCGAAGTGCGCCTGACAGGTGAATCATATTGACAGGTCATGAAAATGAGACCAAAAGATCTCTGGAAGCGATTAATGATAAAATTTCATGGAGAAGAAGGCCTTGACTACGGAGGGGTTGCCAGGT
>STRG.50186.4
CGTGGCGCAGTGCGAAGGGACGCGGTGCGCATGCGCGTGAGGGCTGCCGCGGGTGGGTGGTATCGAGGCCTGTCGGGTCAGGGCGGTTCGCGGGTGCTGTCAGAGCTGGGCCGGGGCCCCTAGGCAGGGTAGCCGGGTCGTAGAGGCGGGGGCCGGTCGCGGTCGGTGGAGCGGGATGAGGATGTAGGAGGGGCGGACGTGGCGGAAGCCGCGGGGTCCGCGGGGTCGGTGCCTCTAGGGAGCCAGGGAGGCCTTTCCCGAGGCTCCTGGGGAAGAAGAGGCGAAGCGAGAGTCCCTGGGGAACCCCCACTCCACTCCCAGCTGGAGACTGGGTTGTGTCTGCATGGACCAGAGCCCACAGTGCGAGTTGCTATAGGCAACCAGCCAGGGTGGCCAGCT…
>STRG.50264.1
AGAACCTGGAACGGTCACAGGAAACCCGGGCGCGGGGTAGTCGGGCCGAGGGGGACCTTTGCCCACGGTCCAGAGTGGTCTGGACTCGGCCCACGCGTGAGAGGAGCGCTTGGTGACGATCCCACGTACGCTTGGTGACTGGTGGAGGTCCCAGAGAAGGACCGTGCGTGCAAAAGGCGAACCTCGGTGTGCGGTGTGTCCACGTGTGCAAGCTGGGGAGGGGAGGGGGCGCAGAAGGCGTGACAAAGACGGACTCTGTCTTGAGTGTGCGCCTCGCTCCGGCCCGCTCCCAGCGAACTGTGCCTGAAGTGTGTCTCACGGGAGGGCCAGGACGAAGGTGACAAAGGCTAGGTGTCCCCCACGGAGACGCGCCAAGGTAGCCCCGCGCGTGTCCGTAGG…
>STRG.50324.6
AGTCCCCACCAGAAGCCAAGCCTGGTGGGCCTTCAGCCAACCACCGCACGCCACGGACCGCCCAGGAGTCCCTGTCCCGAGCGCGCCGTCAGCCCCGTCCAGGGCCTGCAGGACGGAACCCGCCCTGCGCTCCACACCTGAGGCCGCTCCCTTCGCCTCTTCTCCTCAGGTGCTGTCCTTATTCCCAGCCCAGTCAAGAGCTACCGGGGCTGGCTAGTCATGGGGGAGCCCAGTAGAGAGGAGTATAAAATCCAGTCCTTTGATGCAGAGACCCAGCAGCTGCTGAAGACAGCACTCAAAGATCCGGGTGCTGTGGACTTGGAGAAAGTGGCCAATGTGATTGTGGACCATTCTCTGCAGGACTGTGTGTTCAGCAAGGAAGCAGGACGCATGTGCTAC…
>STRG.50335.1
GTGGCGGCGCGCGCAGCGGCAGGCGGCGGCGGGATGGAGCCCGAGCCCGAGCCCGCGGCCGTGGAGGTTCCCGCGGGGCGCGTGCTCAGCGCCCGGGAGCTCTTCGCCGCCCGCTCGCGGTCGCAGAAGCTGCCCCAGCGCTCGCATGGCCCCAAGGACTTTCTGCCCGACGGCTCGGCAGCTCAGGCCGAGCGGCTGCGCCGGTGCCGGGAAGAGCTCTGGCAGCTGCTGGCAGAGCAGCGCGTGGAGCGCCTGGGCAGCTTGGTGGCTGCCGAGTGGAGGCCAGAAGAGGGCTTCGTGGAGTTGAAGTCTCCCGCGGGCAAATTCTGGCAGACCATGGGCTTCTCAGAGCAGGGCCGGCAGCGCCTTCACCCGGAAGAGGCCTTGTATCTTCTGGAG…
>STRG.50368.1
CCTTTGGCGCGTGAGTGACAGCGGCCCAGACAGAGGGGGCGATGTCCGCGTCGTGGCTGGGGCCGGTCGCGGGGCAGACTAATCCCCTGCTCCTGGCCAGGGGAGGCTCCCGAGCGGATCCTCGGGAAAGGGGCTCCGAAGGTCAAGAAACTGCCCTGCTGGGCGTCCGGGGAGTGGGAAAATAAAGCACTTTTTGTATCCCGCCCCTCCCCCGTCACGTGACCACGCGAGGCGGAAAGAAGAAATCCGAGGACCGGCGACGCCTAGAACAGGAGCCCATGATGCTGCCCAAACCTGGGACCTATTACCTCCCCTGGGAGGTTAGTGCAGGCCAAGTTCCTGATGGGAGCACGCTGAGAACATTTGGCAGGTTGTGCCTCTATGACATGATTCAGTCCA…
>STRG.50381.1
ACAACATTCGCCGGGCGGGCGGCGGCGGAGCGGGCGGCGGAGCGGCGGCAGCAGCGGTGAGCGCGAGCCCCGGAGCCCCGGGCGGCCGGCCTCCCGCGCCCGCGCAGCCCCGCGTCTGCGTCCGGCCGGAGACGCCGGGCCCCGCGCCGCGCCGCGCCATGTCGGTGAACATGGACGAGCTGCGGCACCAGGTCATGATCAACCAGTTCGTGCTGGCCGCGGGCTGCGCGGCCGACCAGGCGAAGCAGTTGCTGCAGGCGGCCCACTGGCAGTTCGAGACCGCGCTGAGCACGTTCTTCCAAGAAACCAACATTCCCAACAGCCACCACCACCACCAGATGATGTGCACTCCCAGCAACACCCCTGCCACGCCGCCCAACTTCCCCGATGCGCTGGCCA…
>STRG.50416.1
CGCGGCGCGATGGAGGCGCCGGCCGAGCTACTGGCCGCGCTGCCTGCGCTGGCCACCGCGCTGGCCCTTCTGCTCGCCTGGCTACTGGTGCGGCGTGGGGCGGCCGCGAGCCCGGAGCCTGCCCGCGCGCCCCCGGAACCCGCGCCCCCGGCCGAGGCCACCGGGGCCCCGGCGCCGTCCCGCCCCTGCGCCCCCGAGCCGGCGGCCTCGCCCGCGGGGCCGGAGGAGCCTGGAGAGCCCGCGGGGCTGGGGGAGCTCGGGGAGCCTGCGGGACCGGGGGAGCCCGAAGGGCCAGGGGATCCCGCGGCGGCGCCAGCGGAGGCGGAGGAGCAGGCGGTGGAGGCGAGGCAGGAAGAGGAGCAGGACTTGGATGGTGAGAAGGGGCCATCATCGGAAGGG…
>STRG.50416.3
GGGGCGCGGCGGGCTCCCTCGGGGTCCCAGCTGGCCCGCACTCGGCGGCCGCGGCGCGATGGAGGCGCCGGCCGAGCTACTGGCCGCGCTGCCTGCGCTGGCCACCGCGCTGGCCCTTCTGCTCGCCTGGCTACTGGTGCGGCGTGGGGCGGCCGCGAGCCCGGAGCCTGCCCGCGCGCCCCCGGAACCCGCGCCCCCGGCCGAGGCCACCGGGGCCCCGGCGCCGTCCCGCCCCTGCGCCCCCGAGCCGGCGGCCTCGCCCGCGGGGCCGGAGGAGCCTGGAGAGCCCGCGGGGCTGGGGGAGCTCGGGGAGCCTGCGGGACCGGGGGAGCCCGAAGGGCCAGGGGATCCCGCGGCGGCGCCAGCGGAGGCGGAGGAGCAGGCGGTGGAGGCGAGGCA…
>STRG.50422.1
AGTTGTTACTCAGGTGCGCTAGCCTGCGGAGCCCGTCCGTGCTGTTCTGCGGCAAGGCCTTTCCCAGTGTCCCCACGCGGAAGGCAACTGCCTGAGAGGCGCGGCGTCGCACCGCCCAGAGCTGAGGAAGCCGGCGCCAGTTCGCGGGGCTCCGGGCCGCCACTCAGAGCTATGAGCTACGGCCGCCCCCCTCCCGATGTGGAGGGTATGACCTCCCTCAAGGTGGACAACCTGACCTACCGCACCTCGCCCGACACGCTGAGGCGCGTCTTCGAGAAGTACGGGCGCGTCGGCGACGTGTACATCCCGCGGGACCGCTACACCAAGGAGTCCCGCGGCTTCGCCTTCGTTCGCTTTCACGACAAGCGCGACGCTGAGGACGCTATGGATGCCATGGAC…
>STRG.50436.1
ACGGTCTGGGGAAAGGCTCCTGTGTTGTTGAGCCTGCCAAGTTGTGGGTGCAGCATGGTACCAGGCAGCCCAACCCTGACCTAAAGTAAATTCCCGGAAGAAGTCTTTCCTGGGTTTTGAATTTGCAGTAACAGGTGTGAGCATTCTAGCAGCAGTTTGATGATCATGTATGATACTGCAAACAGGA
>STRG.50528.2
AGAGTATTATGGTCTGTCGTGCGCTGGCTGCTGCTTTTCTGCTCCTGGAAGCGGCCAAGGGGGGAAGCGGCGAGTCAACATGGAGCTTTCAGCGGTGGGGGAGCGGGTGTTCGCGGCCGAAGCCCTCCTGAAGCGGCGCATACGGAAAGGACGCATGGAATACCTCGTGAAATGGAAGGGATGGTCGCAGAAGTACAGCACATGGGAACCGGAGGAAAACATCCTGGATGCTCGCTTGCTCGCAGCCTTTGAGGAAAGGGAAAGAGAGATGGAGCTCTATGGCCCCAAAAAGCGTGGACCCAAGCCCAAAACCTTCCTCCTCAAAGCGCAGGCCAAGGCAAAGGCCAAAACTTACGAGTTTCGAAGTGACTCAGCCAGGGGCATCCGGATCCCCTACCC…
>STRG.50608.1
AGGACCCGAGCTACGGTGGCCGCGGGGCGGCGGTGGCGATTGGACTTGGTGGGTCCCGGGCCAGGGGCGGGCGCCGCCATGGGTAACCTGTTCGGCCGCAAGAAGCAGAGCCGCGTCACGGAGCAGGACAAGGCCATCCTGCAACTGAAGCAGCAGCGGGACAAGCTGAGGCAGTACCAGAAGAGGATCGCCCAGCAGCTGGAGCGCGAGCGCGCCCTGGCCCGGCAGCTGCTGCGGGACGGCAGGAAGGAACGGGCCAAGCTGCTGCTCAAGAAGAAGCGATACCAGGAGCAGCTCCTGGACAGGACGGAGAACCAGATCAGCAGCCTGGAGGCCATGGTTCAGAGTATTGAGTTCACCCAGATCGAAATGAAAGTGATGGAGGGGCTGCAGTTTGGA…
>STRG.50613.2
GTGGTTCGGGTCCGCTTTCGTCTCCGTCCTGCTGCCGTTACCGCCGCTGCTGCCGCCGCTTGCGTCCCCCGCTCCGGTCTGTGGTGCAGCCGGGACCCAGGACCATGTCTCTGTCTCGCTCAGAGGAGATGCACCGGCTCACGGAAAATGTCTATAAGACCATCATGGAGCAGTTCAACCCTAGCCTCCGGAACTTCATCGCCATGGGGAAGAATTACGAGAAGGCACTGGCAGGTGTGACGTATGCAGCCAAAGGCTACTTTGACGCCCTGGTGAAGATGGGGGAGCTGGCCAGCGAGAGCCAGGGCTCCAAAGAACTCGGAGACGTTCTCTTCCAGATGGCTGAAGTCCACAGGCAGATCCAGAATCAGCTGGAAGAAATGCTGAAGTCTTTTCACA…
>STRG.50662.1
GTCATTTCCGGCTCGAATGCCCGGCAGCCGTGGCGGCTAGAGCGTTCCTCCCCAGCTCGAATGCCCGGCGGCCGAGGCGGCTAGAGCGTCGCCTCCTCCCGGGGAACCGCGTGTGACCTTCCAGCCCGCGGACCGATGCTGCCGGCGGCCGCTCGCCCCCTGTGGGGGCCTTGCCTTGGGCTTCGGGCCGCTGCGTTCCGCCTTGCCAGGCGACAGGTGCCATGTGTCTGTGCCGTGCGACATATGAGGAGCAGCGGCCATCAGAGGTGTGAGGCCCTCGCTGGTGCACCCCTGGATAACGCCCCCAAGGAGTACCCCCCCAAGATACAGCAGCTGGTCCAGGACATCGCCAGCCTCACTCTCTTGGAAATCTCAGACCTCAACGAGCTCCTGAAGAAA…
>STRG.50668.1
ACTTCCGGCGGGGCCTCCCAGCTGGAAGAGGCGGTGGCGGCGGGTCGGGGCGAGAGGCTGAGGGGATCTGGCGGTGGAGCGCTAGGATCAGACGCCCCCGCGATGACCAGCTCCCCCGTCTCCAGAGTCGTGTACAACGGCAAGAGGACCAGCAGCCCCCGCTCCCCACCCAGCAGCAGCGAGATCTTCACCCCAGCCCACGAGGAGAACGTCCGCTTCATTTACGAAGCCTGGCAGGGTGTGGAGCGAGACCTGCGAGGCCAGGTGCCGGGTGGCGAGCGGGGCCTGGTGGAGGAGTATGTGGAGAAGGTCCCTAACCCCAGCCTGAAGACCTTCAAGCCCATCGACCTGAGTGACCTGAAGCGCCGGAGCACGCAGGATGCCAAGAAGTCCTAGAGC…
>STRG.50682.1
GGATTCGCTGGCGCGACGGGGGCGGGGCCTGGGTGCGGGTGCCGCGTGGCGGCCGCAGCGCTGAGGGAGCCGGTGCCATCTGTGGGGGCTTTGGGCCAGGGGTCTCCGGACAGCATGAGCGTGGGCTTCATCGGCGCTGGCCAGCTGGCTTTTGCCCTGGCCAAGGGCTTCACAGCAGCAGGCGTCTTGGCTGCCCACAAGATAATGGCTAGCTCCCCAGACATGGACCTGGCCACAGTTTCTGCTCTCAGGAAGATGGGGGTGAAGTTGACACCCCACAACAAGGAGACGGTGCAGCACAGTGATGTGCTCTTCCTGGCTGTGAAGCCACACATCATCCCCTTCATCCTGGATGAAATAGGCGCCGACATTGAGGACAGACACATTGTGGTGTCCTGC…
>STRG.50682.5
CTGGGTGCGGGTGCCGCGTGGCGGCCGCAGCGCTGAGGGGTGGGTACGACCCGCGCACGGTAGCTGGGTTGGGGTCGGGCTCCGGGAATGGTGGGCGGCGGTCGCCGGGTGGGGCGCGACGGTAGCCCAGTTCTGGGCGGGGTGGGAACCCAGACGGGGGACCCCTAGGCGCCGGGCCCTCCCTCTCCCCGTACTTTTCCCCCTTCCCAGTCATTTCTTCTGCGGAACCTCCACCCCTCCAGTGGGTGCGGGACCCTAGGCAGCAGGCCAGGCACCGCCGCTCTGACTGGGGGCCCCGAAGCAGTTAACGGGCCGGACAGCAAAGTGGAAAGTTAGACCAGCTGGGACCAGGGGAGGTGGGCACCCGGCTGCGGGAGGAGCGGCCAGGCTGGCACTGCC…
>STRG.50686.1
ATTGGCGCGGGCCGCAGCCAGCGCACCCAGACCCTGCGCTGCCCTCGGACGGCCGGGCGCGGAGCCCCAGCTGCGGAGGCCGACGGCACCCGGCCCCGAGCGCCTCGACGCCGAGCCGCGCGCGCCTTCTCCGCCAGGCCCGGCGGGCGGGAGCGGGGGCGAGGGAGCAGGAGCGGCCAGTGCCCCCGACACCCCCGGCCCGGCACCCCCGGCCCGGCATCCCCCGCCGCCGCCGCCGCCGCCTCAAGGCCGCCCGCTCCCCGCAGGTGGACGCGGCCATGGGCCGAGGGGTGCGCGTGCTGCTGCTGCTGAGCCTGCTGCACTGCGCCGGGGGCAGCGAGGGCAGGAAGACCTGGCGGCGCCGGGGTCAGCAGCCGCCTCCTCCCCCGCGGACCGAGG…
>STRG.50693.1
GGAGACTGCGCCGACATGGAGCTGTTCCTCGCGGGCCGCCGGGTGCTGGTCACCGGGGCAGGCAAAGGTATAGGGCGCGGCACGGTCCAGGCGCTGCACGCGACGGGCGCGCGGGTGGTGGCTGTGAGCCGGACTCAGGCGGATCTTGACAGCCTTGTCCGCGAGTGCCCGGGGATAGAACCCGTGTGCGTGGACCTGGGTGACTGGGAGGCCACCGAGCGGGCGCTGGGCAGCGTGGGCCCCGTGGACCTGCTGGTGAACAACGCCGCTGTCGCCCTGCTGCAGCCCTTCCTGGAGGTCACCAAGGAGGCCTTTGACAGATCCTTTGAGGTGAACCTGCGTGCGGTCATCCAGGTGTCGCAGATTGTGGCCAGGGGCTTAATAGCCCGGGGAGTCCCA…
>STRG.50696.4
AGTGGACGGCACGCCGCGGCGGGGTGGGTGCAAGATGCCGCTGCCGGTTCAGGTGTTTAACTTGCAGGGGGCCGTGGAGCCCATGCAGATCGACGTGGACCCCCAGGAAGACCCGCAGAATGCACCTGACGTCAACTACGTGGTGGAGAACCCCAGCCTGGATCTGGAACAGTACGCGGCCAGCTACAGCGGCCTGATGCGCATCGAACGGCTGCAGTTCATTGCTGATCACTGCCCCACGCTGCGGGTGGAGGCCCTGAAGATGGCCCTCTCCTTCGTGCAGAGAACCTTTAACGTGGACATGTACGAGGAGATCCACCGCAAGCTCTCAGAGGCCACCAGGGAGCTGCAGAACGCACCCGACGCCATCCCTGAGAGCGGCGTGGAGCCCCCAGCCCT…
>STRG.50846.1
AAGGTGCCCGAGGCTCGCGGGCGCTGCGCTGAGGGGACGGCGGGAGGCGCGGCCTGGCCTCGCACTCAAAGCCGCCGCAGCGCGCCCCGGGCTCGGCCGACCCGGCGGGGATCTAGGGGTGGGCGACTTCGCGGGACCGTGGCGCATGTTTCCTGGGAGTTACTGATCATCTTCTTTGAAGAAACATGAAGTTACACTATGTTGCTGTGCTTACTCTAGCCATCCTGATGTTCCTGACATGGCTTCCAGAATCACTGAGCTGTAACAAAGCACTCTGTGCTAGTGATGTGAGCAAATGCCTCATTCAGGAGCTCTGCCAGTGCCGGCCGGGAGAAGGCAATTGCTCCTGCTGTAAGGAGTGCATGCTGTGTCTTGGGGCCCTTTGGGACGAGTGCTGTG…
>STRG.50855.4
ACCGGCTCCCCGGCTCGCGCCGCTCCATGTAGCCCCGGCTCCCCGGGCGGCCGCGGAGGAGGGGGCGACCACAAGATGGCGGACCTCTCGCTGCTTCAGGAGGACCTGCAGGAGGACGCAGACGGATTTGGTGTGGATGACTACAGCTCAGAGTCTGATGTGATTATTATACCTTCAGCCCTGGACTTTGTCTCACAAGATGAAATGTTGACGCCCCTGGGGAGATTGGACAAGTATGCTGCAAGTGAGAACATATTTAACAGACAAATGGTGGCCCGGAGTTTGCTCGATACCTTGAGGGAAGTCTGCGATGATGAAAGAGATTGTATTGCTGTTTTGGAAAGAATTAGCAGATTGGCCGATGATTCAGAACCAACTGTGAGAGCGGAGCTGATGGAA…
>STRG.50862.1
GAGGCTCGCAAGTGCGCGTGGCCGTGGCGGCTGGTGTGGGGTTGAGTCAGTTGTGGGACCCGGAGCTGCTGACCCAGCGGGTGGCCCACCGAACCGGTGACACAGCGGCAGGCGTTAGGGCTCGGGAGCCGCGAGCCTGGCCTCGTCCTAGAGCTCGGCCGAGCCGTCGCCGCCGTCGTCCCCCGCCCCCAGTCAGCAAACCGCCGCCGCGGGCGCGCCCCCGCTCTGCGCTGTCTCTCCGATGGCGTCCGCCTCAGGGGCCATGGCGAAGCACGAGCAGATCCTGGTCCTCGATCCGCCCACAGACCTCAAATTCAAAGGCCCCTTCACAGATGTAGTCACTACAAATCTTAAATTGCGAAATCCATCGGATAGAAAAGTGTGTTTCAAAGTGAAGAC…
>STRG.50862.2
TCAGTTGTGGGACCCGGAGCTGCTGACCCAGCGGGTGGCCCACCGAACCGGTGACACAGCGGCAGGCGTTAGGGCTCGGGAGCCGCGAGCCTGGCCTCGTCCTAGAGCTCGGCCGAGCCGTCGCCGCCGTCGTCCCCCGCCCCCAGTCAGCAAACCGCCGCCGCGGGCGCGCCCCCGCTCTGCGCTGTCTCTCCGATGGCGTCCGCCTCAGGGGCCATGGCGAAGCACGAGCAGATCCTGGTCCTCGATCCGCCCACAGACCTCAAATTCAAAGGCCCCTTCACAGATGTAGTCACTACAAATCTTAAATTGCGAAATCCATCGGATAGAAAAGTGTGTTTCAAAGTGAAGACTACAGCACCTCGCCGGTACTGTGTGAGGCCCAACAGTGGAATTATT…
>STRG.50887.1
GCAGTTCCCGGGTCCCTCGGCCACCGAAGCCACCCTGCCCTGGTGAAAGGGCTCCCGCACCGCCCGGTGCTCCCCATCTGCCTGGCGTTGTGCGCAGAGCTGGAAAGCATGGCTGTTATAAATGAATTCTGATTTTGGGGAGCAGATGCCAACTTAGAGCCTCGTACCAATCTCTCTGTCTTTAAAAGATGAGGTGACTTGGTGATTTTCCTGGAAAATTATAGGTGCCCAGCTAAGACCTGAATGCCATCACCCTCCCCAGGGCTCTGCAGTTTTCTCGTGGTGAACCCTTGATGGATTTGTTGTTGCTTGAGAAATGGCGATGATCGAATTGGGGTTTGGAAGACAGAATTTTCATCCATTAAAGAGGAAGAGTTCATTGCTGTTGAAACTCATAGC…
>STRG.50922.1
ATTTCCAGGTCAGCCCCCGGCCTGACGCGGCGTTGCGTCCCCCGGGAGCTGCGCTAGGCGAACGGCTGCGGCGCTTTGTGCTCCAGTCGCTCCTAACGCTCCCTGGCCCGGCCGGGGCCGCGCAGTTAGGGCATCTGAGGCGGGGAGAAGCGGCGGGGAGACGCCGGCTGCCAGCATGTCGCTGCCTCCGGAGAAAGCCTCCGAGCTGAAGCAGCTCATCCACCAGCAGCTGAGCAAGATGGATGTCCATGGTAGAATAAGAGAAATCCTTGCTGAGACTATACGGGAAGAATTGGCACCTGATCAACAGCATTTATCAACAGAAGATTTGATCAAAGCCCTTAGACGTCGAGGAATCATTGACGATGTGATGAAAGAACTTAATTTTGTTACTGACAG…
>STRG.50923.4
GCCTTCTTGCTGCCCTCGTTCTTGCCAGGGCCGCGGTTAGTCCCTGCTGGCCACCCCACTGCGACCATGTTCGTTCCCTGCGGGGAGTCGGCCCCCGACCTTGCCGGCTTCACCCTCCTAATGCCAGCAGTATCTGTTGGAAATGTTGGCCAGCTTGCAATGGATCTGATTATTTCTACACTGAATATGTCTAAGATTGGTTACTTCTATACCGATTGTCTTGTGCCAATGGTTGGAAACAATCCATATGCGACCACAGAAGGAAATTCAACAGAACTTAGCATAAATGCTGAAGTGTATTCATTGCCTTCAAGAAAGCTGGTGGCTCTACAGTTAAGATCCATTTTTATTAAGTATAAATCAAAGCCATTCTGTGAAAAACTGCTTTCCTGGGTGAAA…
>STRG.50930.1
GTGCGGGGGCGTGGGCAGCACAAGCCGTGCGCTCCCGGGCTGCGAGGTCTGGCTAGGCTACGGGCCACGCGCCGCCGCCGCTGCCGCCGCCACTGTCCTCTTCGGAGGCGCGGGCCCGACGGAAACCATGTTTGTGGCTCGCAGCATCGCGGCGGACCACAAGGATCTCATCCACGATGTCTCTTTCGACTTCCACGGGCGGCGGATGGCAACCTGCTCCAGCGATCAGAGCGTTAAGGTCTGGGATAAAAGTGAAAGTGGTGATTGGCATTGTACTGCTAGCTGGAAGACACATAGTGGATCTGTATGGCGTGTGACATGGGCCCATCCTGAATTTGGGCAGGTTTTGGCTTCCTGTTCTTTTGACCGAACAGCTGCTGTATGGGAAGAAATAGTAGG…
>STRG.50939.1
AGAAGCTTCACTGAGCGGGCACTGGAGGTCGCGAGCACGTTGCTAGTGGGCGCGGCTGGCGGGGCCGGGGGCGGCAGGGGGCTAGCGTCCGGCTGAGCCCGGCGGGTTCCTGCACGCGGACCCACGCTTTGTCGGGCTGCTCTGCTGAGTGACACCGCCGTGGCATCCGAGGAGCTGTGGTCCAGCCTGCGCGGCGGGAAGCGGCGGCGGCGGCTCCAGCGTCCTAAGAGAAGCTGAAACCTATCAACACTCTTCAAAATGCAATGGAATGTACCACGGACTGTATCTCGACTGGCACGCAGGACATGCTTGGAACCACATAATGCTGGTCTCTTTGGACACTGTCAAAATGTAAAGGGACCTTTACTTTTATACAATGCTGAATCCAAAGTGGTTTTG…
>STRG.51060.3
CCCCTCCCCTCCCGGCTCCGCTTGGCTCCGGGCAGGTAGAGCCGGGCTCCGGGCGCGCGCGGGGCCGCAGCAGCTGCTCCCGATCTCGCCTCGGCCCAGCGCAGGGCCTCGCACGCCCATGGCCGGCTCGGAGCAGCAGCGGCCGCGGCGGCGGGACGACGGAGACTCGGACGCGGCAGCGGCGGCGGCGGCGCCCCTGCAGGACGCGGAGCTGGCCCTGGCCGGCATCAACATGCTGCTCAACAACGGCTTCAGGGAGTCGGACCAGCTTTTCAAACAATACAGAAATCATAGCCCACTAATGAGTTTTGGAGCCAGCTTTGTCAGTTTTTTGAATGCCATGATGACATTTGAGGAAGAAAAAATGCAGTTGGCATGTGATGACTTAAAAACCACAGA…
>STRG.51333.2
TCTGGCATTGCAAGCCTCGCTTCGTTGCCACTTCCCAGCTCTTCCCGCCTTCCGCGGTATAATCAACACTACGAGAGATAGAGCCGCCTAGAACCAGTCCGGAGGCTGCGGCTGCAGAAGTACCGCCTGCGGAGTAACTGCAAAGATGCTGTCCGTGCGCGTTGCTGCGGCCGTGGTCCGCGCCCTTCCTCGGCGGGCCGGACTGGTCTCCAGAAATGCTTTGGGTTCATCTTTCATTGCTGCAAGGAACTTCCATGCCTCTAACACTCATCTTCAAAAGACTGGGACTGCTGAGATGTCCTCTATTCTTGAAGAGCGTATTCTTGGAGCTGATACCTCTGTTGATCTTGAAGAAACTGGGCGTGTCTTAAGTATTGGTGATGGTATTGCCCGCGTACA…
>STRG.51484.1
ACCCGGCTCGGCCACTGCTGGGCGGACACCTGGGCGCGCCGCCGCGGGAGGAGCCCGGACTCGGGCCGAGGCTGCCCAGGCAATGCGTTCACTCGGCGCAAACATGGCTGCGGCCCTGCGCGCCGCGGGCGTCCTGCTCCGCGATCCGCTGGCATCCAGCAGCTGGAGGGTCTGTCAGCCATGGAGGTGGAAGTCAGGTGCAGCTGCAGCGGCCGTCACCACAGAAACAGCCCAGCATGCCCAGGGTGCAAAACCTCAAGTTCAACCGCAGAAGAGGAAGCCGAAAACTGGAATATTAATGCTAAACATGGGAGGCCCTGAAACTCTTGGAGATGTTCACGACTTCCTTCTGAGACTCTTCTTGGACCGAGACCTCATGACACTTCCTATTCAGAATAA…
>STRG.51585.3
AGTCTGCCCCGCGCGCGGAGCTGCGCGCACTGGGTCCCCAAGAGCCCGCGGGCGTCCGGCAGCCGAGCGCACGTTCTTTCGGATGCACACGCCCGGGTCCCTGGCGTCTGACGCCGTGGGGAGGGCAGCGAGGCCCCAGGTACTTACTACACCATTCTTTGGCGAAGGCTATTCAGCAGTGGTGACCTCTTCCAATCCAACACTCTACAGATTATTATCTCTGGACTCCCAGCTGACACCCTGCCGGAGGCAAGAGCTACTAAGCCAACTGGAACTGTGCCTTTTCTCTTGTCAAGGTTTTTTTCTTACACAGGAAAAAGAAAGAAAAAAAAAAGATGAAGTTGGGCAAAGTGGAGTTCTGCCATTTTCTGCAGCTAATAGCTCTTTTCCTGTGTTTTT…
>STRG.51728.4
CGCGCGCGGGTCAGCGGCGCGGGGACGCGGGGCGCTGGGCGCGGGGCTGGGGGCGCAGGCCCCGAGGCCGCAGGAGCGCGCGGAGCGGCGATGAGCAGGCGGCCGGTGGCCCGCGGGGCGCGGAGCCCGTGACAGCCTCGGCCAGGCGGGCGCTGCGATGGAGGCCGAGGGCCTGGACTGGCTCCTGGTGCCACTGCACCAGCTGGTGTCCTGGGGCGCGGCCGCGGCCATGGTCTTCGGAGGGGTGGTGCCCTACGTCCCGCAGTATCGGGACATTCGCAGGACGCAGAACGCCGACGGCTTCTCCACCTACGTGTGCCTGGTGCTGCTGGTGGCCAACATTTTGCGGATACTCTTCTGGTTTGGAAGGCGCTTTGAGTCCCCGCTGCTGTGGCAGAG…
>STRG.51796.2
AGGCACTGACCGGGTTGCAGATCGGGAGACGGAGGCTCGGAGAGGCCCAGGGGCTGCTCTGCCATCCCCCCTTTCCCTGCAGCCTGGGGGCTCCCTGACGCCTGGACTCCCCCCCTGCAGGTGCTGCCCGAGCTGCGGAGATCGTGGGCGGGCACGAGGCGCAGCCACACTCCCGGCCCTACATGGCCTCCCTGCAGATGCGGGGGAACCCGGGCAGCCACTTCTGCGGAGGCACCTTGATCCACCCCAGCTTCGTGCTGACGGCCGCGCACTGCCTGCGGGACATACCCCAGCGCCTGGTGAACGTGGTGCTCGGAGCCCACAACGTGCGGACGCAGGAGCCCACCCAGCAGCACTTCTCGGTGGCTCAGGTGTTTCTGAACAACTACGACGCGGAGA…
>STRG.51805.3
GAAGGCAAGATGGCGGCGCCCATGGAGGTGGCCGTGTGTACGGACTCGGCGGCCCCGATGTGGAGCTGCATCGTGTGGGAACTTCACTCGGGCGCCAACCTGCTCACCTACCGCGGCGGCCAGGCGGGACCCCGCGGCCTGGCGCTGCTCAATGGCGAGTATCTGCTGGCGGCGCAGCTGGGCAAGAATTACATCAGCGCCTGGGAGCTCCAGCGGAAGGACCAGCTCCAGCAGAAGATCATGTGCCCCGGGCCTGTCACCTGTCTGACTGCATCACCCAATGGTCTCTACGTCCTGGCAGGAGTTGCAGAAAGCATCCACCTGTGGGAGGTCTCCACCGGGAACCTTCTGGTCATCCTGAGTCGACACTACCAGGACGTCTCCTGCCTTCAGTTCACA…
>STRG.51814.1
AGTCCGCGCGGGTTCTCGCGCGGAGAAGGGGTGCGAGCGGCGGCGGCGGCGGAGGCTGCCATGGACGACGAGGAGGAGACGTACCGGCTCTGGAAAATCCGCAAGACCATCATGCAGCTGTGCCACGACCGTGGCTATCTGGTGACCCAGGACGAGCTTGACCAGACCCTGGAGGAGTTCAAAGCCCAATCTGGGGACAAGCCGAGTGAGGGGCGGCCGCGGCGCACGGACCTCACCGTGCTGGTGGCCCACAACGATGACCCCACCGACCAGATGTTTGTGTTCTTTCCAGAGGAGCCCAAGGTGGGCATCAAGACCATCAAGGTGTACTGCCAGCGCATGCAGGAGGAGAACATCACACGGGCTCTCATCGTGGTGCAGCAGGGCATGACACCCTCC…
>STRG.51822.2
AGACGTCCCTGCGCGTCGTCCTCCTCGCCCTCCAGGCCGCCCGCGCCGCGCCGGAGTCCGCTGTCCGCCAGCTACCCGCTTCCTGCCGCCCGCCGCTGCCATGCTGCCCGCCGCGCTGCTCCGCCGCCCGGGACTTGGCCGCCTCGTCCGCCACGCCCGTGCCTATGCCGAGGCCGCCGCCGCCCCGGCTGCCGCCTCTGGCCCCAACCAGATGTCCTTCACCTTCGCCTCTCCCACGCAGGTGTTCTTCAACGGTGCCAACGTCCGGCAGGTGGACGTGCCCACGCTGACCGGAGCCTTCGGCATCCTGGCGGCCCACGTGCCCACGCTGCAGGTCCTGCGGCCGGGGCTGGTCGTGGTGCATGCAGAGGACGGCACCACCTCCAAATACTTTGTGAG…
>STRG.51837.3
GTCTGAAGGCCGAGGCCAAGATGGCGGTGCTGTCAGCTCCTGGCCTGCGCGGCTTCCGGATCCTTGGTCTGCGCTCCAGCGTGGGCCCGGCTGTGCAGGCACGAGGTGTCCATCAGAGCGTGGCCACCGATGGCCCAAGCAGCACCCAGCCTGCCCTGCCAAAGGCCAGAGCCGTGGCTCCCAAACCCAGCAGCCGGGGCGAGTATGTGGTGGCCAAGCTGGATGACCTCGTCAACTGGGCCCGCCGGAGTTCTCTGTGGCCCATGACCTTCGGCCTGGCCTGCTGCGCCGTGGAGATGATGCACATGGCAGCACCCCGCTACGACATGGACCGCTTTGGCGTGGTCTTCCGCGCCAGCCCGCGCCAGTCCGACGTCATGATCGTGGCCGGCACACTCA…
>STRG.51860.1
CAAAGCCGGCGCGCGCCCGGCTGGGGGCGGAGGGCGGGGGCCCGCGGGCCGGAACAGCCGCGGCAAGTGGCGGCGGCGGCAGCGGCAGCGGAGGCAGCTGAGGCGGCGGCGGCGAGTGGGGGTCCGGGCGGCGGCGGCGGGCCCGGCGGCGGGCCGAGGAGCCGGGCGCAATGGAGCGGAAGAGCCCGAGCGGGAAGAAGTTCCGCAGCAAGCCGCAGCTGGCGCGCTACCTGGGCGGCTCCATGGACCTGAGCACCTTCGACTTCCGCACGGGCAAGATGCTGATGAGCAAGATGAACAAGAGCCGCCAGCGCGTGCGCTACGACTCCTCCAACCAGGTCAAGGGCAAGCCCGACCTGAACACGGCGCTGCCCGTGCGCCAGACGGCGTCCATCTTCA…
>STRG.51968.1
ACTGCCGGCGTCGCCGCCATTAGACAATAGCGGTGGGGCCGGGGAGCGGGGAGGCGGGCGGCGGGGAGGGGCGGGGAGGGGCGCCGGGCGCGCAGGAAGCGGGGCCCGGGGCGCGCCGGGGCCGGGCGCGCGGGGAGGGGGCGCAGGAAGCGGGCGAGGCCGGGCGCGGGAGGCGGCGGCGGCCCCGGGAGCTGCCGATCGGCGCCGGGACAAAGGCGCGGCCGCCCGGCGCCCCCAGCAGCCCGAGCCGGGGCGCACAGCCGGGGCGCAGCCCGCGCCCCCCGCCGCGATTGACATGATGTTTCCACAAAGCAGGCATTCGGGCTCCTCGCACCTACCCCAGCAACTCAAATTCACCACCTCGGACTCCTGCGACCGCATCAAAGACGAATTTCAGCT…
>STRG.52014.1
AGTGCGGCCGGCGCTAGGACCCGCGGGGGCCTCCCAGGCCGCGGCGCCTCCCGCTTTCCCCCACTCCCCGACCCTTCTTCGCCCCCAAAATGAGGAAACGGAGCAACTCGCTCCAAGTTGTGCAGCCGGGACCGCCTCGGGGTGTGCAGCCGGCTCGCGGAGGCCCTCCTGGGGGCGGGCGCGGGGCGCGGCTCGGGGGCGCCCCCTGAGCAGAAAACAGGAAGAACCAGGCTCGGTCCAGTGGCACCCAGCTCCCTACCTCCTGTGCCAGCCGACTGGCCTGTGGCAGGCCATTCCCAGCGTCCCCGACTGTGACCACTTGCTCAGTGTGCCTCTCACCTGCCTCAGTTTCCCTCTGGGGGCGATGGCGGGGCGAGGCTCTCTGGTTTCCTGGCGGGC…
>STRG.52049.1
GCAATGCGCGCGGTGATGGAGCGCTAACCGGGGGCGCGGCGGCGGCGAGGGCTCGGCGGGCCATTGGCTACCGGCCGCGGCAAAGGCAGCTTGGGGACCCAGCGTGCGCGGGGCCCGCGGGCCGGGCCGGGGTGACCTGGGCTGCAGCCATGGAAGAACAGAGGGAGGCCCTGAGGAAGATCATCAAAACACTGGCTGTGAAGAATGAAGAAATTCAGAGCTTTATCTACTCCCTGAAACAGATGCTGCTGAACGTGGAGGCGAACTCGGCGAAGGTGCAGGAGGACCTCGAAGCAGAGTTCCAGTCCCTCTTCTCCCTCCTGGAGGAGCTGAAAGAAGGCATGCTTATGAAGATAAAACAGGACCGTGCCAGCCGTACCTACGAGCTGCAGAACCAGC…
>STRG.52094.1
GGTTTCCAAGCTGGTTTTGAAGTCGCGGCAGCTGTTCCTGGGACGTCCGGTTGACCGCGCGTCTGCTGCAGAGACCATGTCTGCCGACGGGGCAGAGGCTGATGGCAGCACCCAGGTGACAGTGGAAGAACCGGTACAGCAGCCCAGTGTGGTGGACCGTGTGGCCAGCATGCCTCTGATCAGCTCCACCTGCGACATGGTGTCCGCAGCCTATGCCTCCACCAAGGAGAGCTACCCGCACATCAAGACTGTCTGCGACGCAGCAGAGAAGGGAGTGAGGACCCTCACGGCGGCTGCTGTCAGCGGGGCTCAGCCGATCCTCTCCAAGCTGGAGCCCCAGATTGCATCAGCCAGCGAATACGCCCACAGGGGGCTGGACAAGTTGGAGGAGAACCTCCC…
>STRG.52174.1
AGTCTCTCGTCATGGAATACGCCTCTGACGCTTCACTGGACCCCGAAGCCCCGTGGCCTCCCGCGCCCCGCGCTCGCGCCTGCCGCGTACTGCCTTGGGCCCTGGTCGCGGGGCTGCTGCTGCTGCTGCTGCTCGCTGCCGCCTGCGCCGTCTTCCTCGCCTGCCCCTGGGCCGTGTCCGGGGCTCGCGCCTCGCCCGGCTCCGCGGCCAGCCCGAGACTCCGCGAGGGTCCCGAGCTTTCGCCCGACGATCCCGCCGGCCTCTTGGACCTGCGGCAGGGCATGTTTGCGCAGCTGGTGGCCCAAAATGTTCTGCTGATCGATGGGCCCCTGAGCTGGTACAGTGACCCAGGCCTGGCAGGCGTGTCCCTGACGGGGGGCCTGAGCTACAAAGAGGACA…
>STRG.52259.1
GCGTGCGCGTGCGCAGGGATAAGAGAGCGGTCTGGACAGCGCGTGGCCGGCGCCGCTGTGGGGACAGCATGAGCGGCGGTTGGATGGCGCAGGTTGGAGCGTGGCGAACAGGGGCTCTGGGCCTGGCGCTGCTGCTGCTGCTCGGCCTCGGACTAGGCCTGGAGGCCGCCGCGAGCCCGCTTTCCACCCCGACCTCTGCCCAGGCCGCAGGCCCCAGCTCAGGCTCGTGCCCACCCACCAAGTTCCAGTGCCGCACCAGTGGCTTATGCGTGCCCCTCACCTGGCGCTGCGACAGGGACTTGGACTGCAGCGATGGCAGCGATGAGGAGGAGTGCAGGATTGAGCCATGTACCCAGAAAGGGCAATGCCCACCGCCCCCTGGCCTCCCCTGCCCCTGCA…
>STRG.52302.1
GGTACCGTGGGAGGGGCCGCGCGTGGGGCAGCGGGGAGCGAGTCCCTCCGTCCCCGCGAGTCGGCGCTTTTGGCCCCGCGGGAGGGGCCGGGCTCGATGAGAAAAGCATCATTCAAGCTCAGATTCGTGTTGAAGCCTGCCACAAGGTCCACCTGTTGTTGTGGGTTTTTGGGTGACCAGGGGTTACCCCCAGCAGTGTGTGAGAATGAAGAGTGTGGGCCACTGTGTCTCTGTTGACCTGCCAGATAGGAAATAGCGCCAGAGTTGCTGCAATCCACGTCTCCCTGGAATTCAGGAGCAGCTTGGCTGGAAGGCTCTGGCTGGAAACTTGCAGAAGGCTGTCAGCTGGGTCTGCATCATCTGAAGGCTCAACGGGTACCGGGGGCCACTCCATGGCCT…
>STRG.52369.3
AGTGGCCTTGACCTCCCGCGGCGTGGGAGGCTGCGCGGCGATGCTGCAGTTCGTCCGGGCCGGGGCGCGGGCCTGGCTTCGGCCTACCGGCAGCCAGGGCCTGAGTTCCCTGGCGGAAGAGGCAGCGCGTGCGACCGAGAACCCGGAGCAGGTGGCGAGCGAGGGTCTCCCGGAGCCCGTGCTGCGCAAAGTCGAGCTCCCGGTACCCACTCATCGACGCCCAGTGCAGGCCTGGGTCGAGTCCTTGCGGGGCTTCGAGCAGGAGCGCGTGGGCCTGGCCGACCTGCACCCCGATGTTTTCGCCACCGCGCCCAGGCTGGACATACTGCACCAGGTTGCTATGTGGCAGAAGAACTTCAAGAGAATTAGCTATGCCAAGACCAAGACGAGAGCCGAGGT…
>STRG.52412.1
GCAGACCAGAGGGTGACCCGGATGATGGCGGCCGGCGCGGCCCTAGCCCTGGCCTTGTGGCTACTAATGCCACCAGTGGAGGTGGGAGGGGCGGGGCCCCCGCCAATCCAGGACGGTGAGTTCACGTTCCTGTTGCCGGCGGGGAGGAAGCAGTGTTTCTACCAGTCCGCGCCGGCCAACGCAAGCCTCGAGACCGAATACCAGGTGATCGGAGGTGCTGGACTGGACGTGGACTTCACGCTGGAGAGCCCTCAGGGCGTGCTGTTGGTCAGCGAGTCCCGCAAGGCTGATGGGGTACACACGGTGGAGCCAACGGAGGCCGGGGACTACAAGCTGTGCTTTGACAACTCCTTCAGCACCATCTCCGAGAAGCTGGTGTTCTTTGAACTGATCTTTGAC…
>STRG.52460.1
CTCTGGGCCAATATGGCAGCGCCCAGCAACAAGACAGAGCTGGCCTGGAGTCCGCGGCTGGCCGCGTGAGTAGGTGATTGTCTGACAAGCAGAGGCATGAGCTGGGTCCAGGCCACCCTACTGGCCCGAGGCCTCTGTAGGGCCTGGGGAGGCACCTGCGGGGCCGCCCTCACAGGAACCTCCATCTCTCAGGTCCCTCGCCGGCTCCCTCGGGGCCTCCACTGCAGCGCAGCTGCCCATAGCTCTGAACAGTCCCTGGTTCCCAGCCCACCGGAACCCCGGCAGAGGCCCACCAAGGCTCTGGTGCCCTTTGAGGACCTGTTTGGGCAGGCGCCTGGTGGGGAACGGGACAAGGCGAGCTTCCTGCAGACGGTGCAGAAATTTGCGGAGCACAGCGTG…
>STRG.52474.1
GTTTCTGGCGACCGTCCCCACCCGGGCTCGCGTCTCCGTTTCTCCGAGAGGCCCAAGGTGTCTCCGCCGCAGCCTCTGTCGCGCCGTGACCTGTACAGGTCGCGGGAGTCGTAGGGAGGACGCCGGGACACCTGGAAGCCGAGAAATGGATTCAGTGGCCTTTGAGGATGTGGCTGTGAACTTCACCCTGGAGGAGTGGGCTTTGCTGGATCCTTCCCAGAAGAATCTCTACAGGGATGTGATGCGGGAAACCTTCAGGAACCTGGCTTCTGTAGGAAAACAATGGGAAGACCAGAACATTGAAGACCCATTCAAAATTCCCAGGAGAAATATAAGTCATATTCCAGAGAGACTCTGTGAAAGTAAAGAAGGTGGTCAAGGTGAAGAAACCTTCAGCCA…
>STRG.52518.3
GTCAATCAGGCGCGCTTCCCAGAGGAGTGTGTGGTTGAAAAAGCCCGCGGCGTCTTCTCCACCCACCTGCGCTGGGCGCTCGGTGCTCGGCTCTGTAGCTAAGAGACGACCTGGAAGTTCCGTGGCAGCCTGTGTCCCGCGGGAACCCGCATTGGCAGCGGGAGCCGTCCGGAGGACCTGGGACACCGCGGAAGTCGGGAAATGGCCTCAGTGGCTTTAGAGGATGTGGCTGTGAACTTCACCCGAGAAGAGTGGGCTTTGCTGGGTCCTTGTCAGAAGAATCTCTACAAAGATGTGATGCAGGAAACCATCAGGAACCTGGATTGTGTAGGAATGAAATGGAAAGACCAGAACATTGAAGATCAATATAGATATCCCAGGAAAAATCTAAGATGTCGT…
>STRG.52537.5
GTTCCCTACTTCCTGTGCTCTTGCGGAGACGCGCGCGTCGGGGTTTAACGCGTTTCTGGGCCGCCGTAAGCCCGGCCTAGGGGCAGCTTTGACTCGAGAGCCGGCTATAGGCGCATGGAAGGTTCCCTGGAACGGGAGGCGCCAGCGGGGGCGCTGGCCGCCGTGCTAAAGCACAGCTCGACGTTGCCGCCCGAAAGCACCCAGGTCCGGGGCTACGACTTCAACCGCGGTGTGAATTACCGCGCACTGCTGGAGGCCTTCGGCACCACCGGCTTCCAAGCAACCAACTTCGGGCGCGCTGTACAGCAAGTCAATGCCATGATCGAGAAGAAGCTGGAACCACTGTCACAGGATGAAGACCAGCACGCGGACCTGACCCAGAGCCGCCGCCCACTTACC…
>STRG.52567.2
AGTTGCACTGTAGCCTCGGCAGTGAACCGGGAGGTACTACCAGGTCGCCGTCGTTGCTCCGCTCGCTCTGAGAGAGCATGGCCCTGAGAGGCGTCTCCGTGCGGCTGCTGAGCCGCGGACCCGGCCTGCACGTCCTTCGCACGTGGGTCTCGTCGGCGGCGCAGACCGAGAAAGGCGGGAGAACACAGAGCCAACTGGCTAAGTCCTCGCGTCCCGAGTTTGACTGGCAGGACCCGCTGGTGCTGGAGGAGCAGCTGACCACAGATGAGATCCTCATCAGGGACACCTTCCGCACCTACTGCCAGGAGAGACTCATGCCTCGCATCCTGTTGGCCAATCGCAACGAAGTTTTTCATCGGGAGATCATTTCGGAGATGGGGGAGTTGGGTGTGCTGGGCC…
>STRG.52572.1
ACACTGGAAGGAGTCATGGCGGATGGTCAGGTGGCGGAACTGCTGCTCCGGCGGCTGGAGGCGTCTGATGGCGGCCTGGACAGCGCCGAGTTGGCGGCTGAGCTGGGCATGGAGCACCAGGCGGTGGTGGGCGCCGTGAAGAGCCTTCAGGCGCTGGGCGAGGTCATCGAGGCTGAACTTCGGTCCACCAAGCACTGGGAGCTTACTGCGGAGGGCGAGGAGATTGCCCGGGAGGGCAGCCATGAGGCCCGTGTGTTTCGAAGCATTCCCCCAGAGGGCCTGGCCCAGAGCGAGCTTATGCGACTGCCCAGTGGCAAAGTGGGCTTCAGCAAGGCCATGTCCAACAAGTGGATTCGGGTGGACAAGAGTGCGGCTGACGGGCCCCGGGTGTTCCGAGTG…
>STRG.52603.1
GCCCCGCTCCCAAGTGCGCGCGGACCCCTAGCTCCCTCTGAGTTGCGCTGGGCTTGGCTGCTGCACCATGACCCTGGAGGCGATCCGCTACTCGCGGGGCTCCCTGCAGATCCTAGACCAGCTGCTGCTGCCCAAGCAGAGCCGCTACGAGGCGGTGGGCTCGGTGCACCAGGCCTGGGAGGCCATCCGCGCCATGAAGGTGCGGGGCGCCCCGGCCATAGCCCTGGTGGGCTGTCTCAGCCTCGCCGTGGAGCTGCAGGCGGGCGCCGGGGGACCGGGACTCGCCGCGCTCGTGGCCTTCGTGCGCGACAAGCTGAGCTTCCTCGTCACCGCCCGGCCCACCGCTGTCAACATGGCCCGCGCCGCCCGCGACCTGGCTGATGTTGCAGCCCGGGAGGC…
>STRG.52657.3
GGTCTGGAGTTTGCGGAGGGCCGAGCCGGGTGCGCACGGGGAGGCGGAGGCAGCGGCGGCGGCGGCGGCGGCGGCGGCGGCGGCGGAGCAGATGAAGAAACTGAGGCCCTGTGATGTGAAGTGACTTGCCCCCCAGCCACACAGCTGGACCATTCTGGCTGCTGTCTGGACAAGAAGTCGTAGGGGGTGAGGGTGGAAGCTGGGAAACCCACAGGAGGCAACCACACTAGTTTAGATCTTCTGGTGACCCCACTTCTCGCTGCTCATGCCGCTGGGACTGGGGCGGCGGAAAAAGGCGCCCCCTCTAGTGGAAAATGAGGAGGCTGAGCCAGGCCGTGGAGGGCTGGGCGTGGGGGAGCCAGGGCCTCTGGGCGGAGGTGGGTCGGGGGGCCCCCAAAT…
>STRG.52662.1
GTCAGTGGTTCCGGGTAGGAGCTAGGTGACCCTCGGCTGCTGCAGGGATCTGCAGCGACTGCAGCCATGGGGGCCCACCTGGTCCGGCGCTACCTGGGCGATGCCTCGGTGGAGCCCGACCCCCTGCAGATGCCAACCTTCCCGCCAGACTACGGCTTCCCCGAACGCAAGGAGCGCGAGATGGTGGCCACACAGCAGGAGATGATGGACGCGCAGCTGAGGCTCCAGCTGCGGGACTACTGCGCCCACCACCTCATCCGGCTGCTCAAGTGCAAGCGTGACAGCTTCCCCAACTTCCTGGCCTGCAAGCAGGAGCGGCACGACTGGGACTACTGCGAGCACCGCGACTATGTGATGCGCATGAAGGAGTTTGAGCGGGAGCGGAGGCTGCTCCAGCGG…
>STRG.52831.3
AGTCGGGTCCATCCTGCAGTAAATGCACAACCCGGACGGAAGTGCCTCTCCGACAGCAGATCCAGGCTCGGAGCTCCAGACGCTGGGACAGGCCGCCCGCAGACCACCCCCGCCGCGCGCGGGACACGACGCCCCCCGCAGGACCCGCCCATCAGCCCGGAAACCCCTGAGCTGCTTCTCCCGGAGGCCGATGCCCACCCGGGAGCCCCCAAAGACTCGCGGCTCCCGGGGGCACCTGCATACTCACCCGCCTGGGCCTGGGCCCCCGCTGCAGGGACTGGCGCCCCGAGGCCTCAAAACCAGCGCCCCCCGCCCTCCGTGCCAGCCCCAGCCGGGACCCCACAAGGCAAAGACCAAGAAGATTGTGTTTGAGGATGAGTTGCTCTCCCAGGCCCTCCT…
>STRG.52841.1
AAAGGGCCGGCTGTTTCGGCGGCCGCGGGATGCCCCTGCGCTGACCGCCAGGGGCAGGTGCCCGCCCGCGTAGACGCACCCGGCCTGACCCCGCGCCACCATGTAAACGGCGCCAGCAGGCGGACGCTGGCTTCTCCGCCTGGGACCCCTCCGCCCCGACCCGGGCCCCGCGGCCCTCGATGAGGACACACCATGCTGACCGGGGTGACCGACGGTATCTTCTGTTGCCTGCTGGGCACGCCCCCCAACGCCGTGGGGCCACTGGAGAGCGTCGAGTCCAGCGATGGCTACACCTTTGTAGAGGTCAAGCCCGGCCGCGTGCTGCGGGTGAAGCATGCAGGACCCGCCCCAGCCGCTGCCCCACCTCCACCATCATCCGCATCCTCGGATGCAGCCCAG…
>STRG.52856.1
GTAGTTCGGTCGCGAGCGCTGCCGTCGGGAGGCGCTCCGAGGTTCGAGGCTGTGCCCCGCGACCCCGCCTTCGGCGCTCGGCTCGCAGGATGGATCCCGTACCCGGGACAGACTCGGCGCCGCTGGCTGGCCTGGCCTGGTCGTCGGCCTCTGCACCCCCGCCGCGGGGGTTCAGCGCGATCTCCTGCACCGTCGAGGGGGCACCCGCCAGCTTTGGCAAGAGCTTCGCGCAGAAATCTGGCTACTTCCTGTGCCTTAGTTCTCTGGGCAGCCTAGAGAACCCGCAGGAGAACGTGGTGGCCGATATCCAGATCGTGGTGGACAAGAGCCCCCTGCCGCTGGGCTTCTCCCCCGTCTGCGACCCCATGGATTCCAAGGCCTCTGTGTCCAAGAAGAAAC…
>STRG.52865.1
CTCCTCCCCGCCGCCGCCCTCGCCATGGCCGCGCCGGCCCCGGGCCTCATCTCGGTGTTCTCGAGTTCCCAGGAGCTGGGTGCGGCGCTAGCGCAGCTGGTGGCCCAGCGCGCAGCATGCTGCCTGGCAGGGGCCCGCGCCCGTTTCGCGCTCGGCCTGTCGGGCGGGAGCCTCGTCTCGATGCTAGCCCGCGAGCTACCCGCCGCCGTCGCCCCTGCCGGGCCAGCTAGCTTAGCGCGCTGGACGCTGGGCTTCTGCGACGAGCGCCTCGTGCCCTTCGATCACGCCGAGAGCACGTACGGCCTCTACCGGACGCATCTTCTCTCCAGACTGCCGATCCCAGAAAGCCAGGTGATCACCATTAACCCCGAGCTGCCTGTGGAGGAGGCGGCTGAGGAC…
>STRG.52936.2
AGTCATGATCACCGAGACCGCGGCGGAGCCTACGGTCCCTGCAGTGCCTGCTGCTGAGGAGGCCACCGAAGCTCGGGGACGCGAGGAGCCGGCGTGGCCCTGGAAAGACGCCCCGATCCGGACGCTGGTGCAGCGCATCCACCAGCTGCAGGCTGAGCGCGCGCAGGGCTTCCGCCGACTGGAGGAGTGGTTGGCGCCGGTGCAGGGCCTGAGAGCCTGGGGGCGCGGCCTCAGGGTCCCCACATGCCGCAGAGGCCACCGCCAGTACCTGCGCAGCGGCCCTGACTACGACTTCGCGCGCTACCGGAGCACAGTGCACGGGGTGACCCAGGCCTTCGCCGCCGCCTCGCGGGAGGTGCTGGCGGTGGAAGCAGAGCTGGGCGGGCCTCGCAGGCAGCC…
>STRG.52945.1
GTGTCTTTCAGGAAGAGGAGCTGGTGAGAAGACAGCGAAATGGCGCCTCCGGCCCCCGGCCCGGCCTCCGGCGGCTCCGGGGAGGTAGACGAGCTGTTCGACGTAAAGAACGCCTTCTACATCGGCAGCTACCAGCAGTGCATAAACGAGGCGCAGCGGGTGAAGCTATCAAGCCCAGAGAGAGACGTGGAGAGGGACGTCTTCCTGTATAGAGCGTACCTGGCGCAGAGGAAGTTCGGTGTGGTCCTGGATGAGATCAAGCCCTCCTCGGCCCCTGAGCTCCAGGCCGTGCGCATGTTTGCTGACTACCTCGCCCACGAGAGTCGGAGGGACAGCATCGTGGCCGAGCTGGACCGAGAGATGAGCAGGAGCGTGGACGTGACCAACACCACCTTCCTG…
>STRG.52946.1
AAGGGGCCCCTACAAGCGGCCACAAGGATGGCAGGCTTCGCGGAGCTCGGGCTGTCATCGTGGCTCGTGGAACAATGTCGGCAGCTGGGTTTGAAGCAGCCCACGCCCGTGCAGCTCGGCTGCATCCCCGCCATCCTGGAGGGTCGAGACTGCTTGGGCTGTGCTAAGACAGGCAGTGGGAAGACAGCAGCGTTTGTCCTTCCCATCTTGCAGAAGCTGTCTGAGGATCCCTATGGCATCTTCTGCCTCGTCCTGACACCCACCAGGGAGCTGGCCTACCAGATCGCAGAGCAGTTCCGGGTCCTGGGGAAGCCTCTAGGGCTGAAAGACTGCATCATCGTCGGTGGCATGGACATGGTGGCCCAGGCGCTGGAGCTCTCTCGGAAACCACACGTGGTC…
>STRG.52951.2
GCGGCCCGGCTCTCTTGCGCAAGCGCGCTGTCCGCTTCTTCTGGGCGGACGCTCTGGAGGCAAAACATTTCCCTGCTGGGGGCGGCGACCACCGTGAGCGTCCCGGAAGGGGCGGCAAAGACGCCTCCGTCGCGCACGAGGTGGCCTCGTTGGCTTTACCTTGGTTCGCGGTCGTCCTTGGTTATCGTGAGCGTCCGCGAGTCTCTGGGAGGCCAAGCCTAGGGGCGCCACAGCGCCTGCGCGCGTACGGCGGCCGGAAGGGGCTAGAGGCGGCTCCCTGGGTGACAACCGCGCGCCCCACCTTTCCCCACGTGGCCGCGAAGACCGGCACCTGTGCACTGAGTGCCTGCTGCGTGTCGGGCCCCGTCCTAGGCAGTGGGGACAAGGAGGCTACAGGGT…
>STRG.52958.5
CTGGGGTGGGGGTAGCGGTCGAGTATCAAGTTGCTTTCTGTCCCGGCAGAGGAAGCCAGATCGCTGAGGGTCCGGTCTCCAGTTTGCCTCCTGCTATATCCATTGGAAGAGAAAAGTTTGTGACTTGGGCCCCCAAGTTTTGAGAGAACTGGGCTTTCGGCGCGGGGGGACAGAGGAGGCTCGTGGGGAGCTTTCCCCATGGAGCTTACCCAGCCTGCAGAAGACCTCATCCAGACCCAGCAGACCCCTGCCTCAGAACTTGGGGACCCTGAAGACCCCGGAGAGGAGGCTGCAGATGGCTCAGACACTGTGGTCCTCAGTCTCTTTCCCTGCACCCCTGAGCCTGTGAATCCTGAACCGGATGCCAGTGTTTCCTCTCCACAGGGCAGCTCCCTGAAG…
>STRG.52989.1
AGTGCGGACGTCGCCATTCCTGGCCCATGGGAAGATTGCGTTTCACCTGCTCCTGAAGGCCGAAGGTGGCTCTAGCGCATCCTTTGTCGCGCCGTGACCTGCAGGTACTGACAGATCCGTAGGGAGGACACCGTGACTTCCCGGACGCTGGGAAATGGACTCAGTCTCCTTTGAGGATGTGGCCGTGAACTTCACCCTGGAGGAGTGGGCTTTGCTGGATTCTTCACAGAAAAAGCTCTATGAAGATGTGATGCAGGAGACCTTCAAAAACCTGGTTTGTCTAGGAAAAAAGTGGGAAGACCAGGACATTGAAGATGACCACAGAAACCAGGGGAAAAATCGAAGATGTCATATGGTTGAGAGACTCTGTGAAAGTAGAAGAGGTAGCAAATGTGGAGA…
>STRG.53119.3
AGGAGCAGCCGGCGCGGCCGCCAGCGCGGTGTAGGGGGCAGGCGCGGATCCCGCCACCGCCGCGCGCTCGGCCCGCCGACTCCCGGCGCCGCCGCCGCCACTGCCGTCGCCGCCGCCGCCTGCCGGGACTGGAGCGCGCCGTCCGCCGCGGACAAGACCCTGGCCTCAGGCCGGAGCAGCCCCATCATGCCGAGGGAGCGCAGGGAGCGGGATGCGAAGGAGCGGGACACCATGAAGGAGGACGGCGGCGCGGAGTTCTCGGCTCGCTCCAGGAAGAGGAAGGCAAACGTGACCGTTTTTTTGCAGGATCCAGATGAAGAAATGGCCAAAATCGACAGGACGGCGAGGGACCAGTGTGGGAGCCAGCCTTGGGACAATAATGCAGTCTGTGCAGACCCC…
>STRG.53183.1
AGTCCGCCGTCCGCCCTCCGCGCCCGCGCCGCTAGCATGACCGACGCGCTGTTGCCCGCGGCCCCCCAGCCGCTGGAGAAGGAGAACGACGGCTACTTTCGGAAGGGCTGTAATCCCCTTGCACAAACCGGCCGGAGTAAATTGCAGAATCAAAGAGCTGCTTTGAATCAGCAGATCCTGAAAGCCGTGCGGATGAGGACCGGAGCGGAAAACCTTCTGAAAGTGGCCACAAACTCAAAGGTGCGGGAGCAAGTGCGGCTGGAGCTGAGCTTCGTCAACTCAGACCTGCAGATGCTCAAGGAAGAGCTGGAGGGGCTGAACATCTCGGTGGGCGTCTATCAGAACACAGAGGAGGCATTTACGATTCCCCTGATTCCTCTTGGCCTGAAGGAAACGAAA…
>STRG.53204.1
GCACTTCACGTGACGCCGGTGCCGGGCGAACATGGCGGCGGCCACCGGACCCTCGTTTTGGCTGGGGAATGAAACCCTGAAGGTGCCGCTGGCGCTCTTTGCCTTGAACCGGCAGCGCCTGTGTGAGCGGCTGCGGAAGAACCCTGCTGTGCAGGCCGGCTCCATCGTGGTCCTGCAGGGCGGGGAGGAGACTCAGCGCTACTGCACCGACACCGGGGTCCTCTTCCGCCAGGAGTCCTTCTTTCACTGGGCGTTCGGTGTCACTGAGCCAGGCTGCTATGGTGTCATCGATGTTGACACTGGGAAGTCGACCCTGTTTGTGCCCAGGCTTCCTGCCAGCCATGCCACCTGGATGGGAAAGATCCATTCCAAGGAGCACTTCAAGGAGAAGTATGCCGT…
>STRG.53628.1
AGACGGAGAGGCCCCGCCGAGGTGAGCGAGGCTCCAACCGGTCACTGGTGGGTCCTGGCACTGGCGGGTCGCAACGCTGTGGGCGTTCCAGGAGGTGGTCGTGGCGAACCTGGCAGCTGCGGGCATCATGGTGGGAGGCTTGAAGAGGAAACACTCTGATTTGGAAGAGGAGGAGGAGAGGTGGGAGTGGAGTCCAGCAGGCCTTCAGAGCTACCAGCAAGCCCTGCTCCGCATCTCCCTAGACAAAGTCCAGCGCAGCCTGGGCCCCCGAGCACCCAGCCTCCGCAGGCATGTCCTCATCCATAACACCCTCCAACAGCTGCAGGCTGCACTTCGCCTGGCTCCCGCCCCTGCCCTGCCCCCCGAGCCCCTCTTCCTGGGCGAGGAGGATTTCTCCCT…
>STRG.53729.2
CTCCCTCCCCCCACCCCGTGCCGGGTGCGCGGCCTGGGAGTCAGCGGCCCGAGCGGGAAGCGCCGGGCGAGCCCACTGTGCGGCCGTCGTGGGGGAAGCGAAGGTTCCTGATTCCACCTACCTCCTAAGTGAAGGCTTCCGTCCCTGGAGAGGAGGCGGCGCCCTGTATCGGCCTTCGTCCTCCGCGGGTGTGCTAGCGTTGGGACGGTCCTTTGTTGCCGCGAGGGGTAGGAGTGGGCGTGGCGGAGCCAGCTCCGTTCGGAACACTCCCGGGCCGACCCGACTCGCTCATCCTGCAGGAGCTGCGGCGCCAAGATGAGTGGAGAGGAGAACCCAGCCAGCAAGCCCACGCCGGTGCAGGACGTACAGGGCGACGGGCGCTGGATGTCCCTGCACCAT…
>STRG.53880.1
AATCCGTGGTCTGGTACAGGTTTCAGGGCAAAGCGGCCATGCGTTCCGGGGGCCGCGGGCGACCCCGCCTGCGGCTGGGGGAACGTGGCCTCATGGAGCCACTCTTGCCGCCGAAGCGCCGCCTGCTACCGCGGGTTCGGCTCTTGCCTCTGTTGCTGGCGCTGGCCGTGGGCTCGGCGTTCTACACCATTTGGAGCGGCTGGCACCGCAGGACTGAGGAGCTGCCGCTGGGCCGGGAGCTGCGGGTCCCATTGATCGGAAGCCTCCCCGAAGCCCGGCTGCGGAGGGTGGTGGGACAACTGGATCCACAGCGTCTCTGGAGCACTTATCTGCGCCCCCTGCTGGTTGTGCGAACCCCGGGCAGCCCGGGAAATCTCCAAGTCAGAAAGTTCCTGGAGG…
>STRG.53941.2
AAGCTGTCCAGGGTATTAAGTTTGCTGCATGGGGTGGAGCTGAGGCCCGGGGCGACCTGCCCTGGCCTGCCGTGGGAGGCCAGCATTCCTCACCCCGAACCCACAATGCCTCAGGGCTAGCACGCCAGCCTCTTGGGGCTGAAGGAGGCTGACTCCCCAAGTCCTGCAAAGGGGTGCAAGCCTAGTTCCAACCCTGCCGGGCTGAGGCATGAGTAGGGGCTGTATTTGCGTGCAGGCGGGCCCCCAAAGCTTCCACTCGCTGCCTTAAAACGCCAACCCAGCCTCTCAGACAATGCTGCCCTCCCACTATGGTATCTAATAACCCTCTGTGTGTCTGTCTCTGCAGAAATATCTTCCCTTCCAACCTGGTGTCAGCAGCCTTTCGCTCATACTCTACCA…
>STRG.53977.1
GTAGGTTGGGTAGTGCGGGTTGGGGCGGGGGCTGCGGAGAGGGTGCTTAACTGAGGGGCATGATGGGGGAGGCGGCCGTGGCCGCGGGGCCTTGTCCGTTGCGCGAGGACAGCTTCACGCGCTTCTCGTCGCAGAGCAATGTGTACGGGCTGGCAGGCGGCGCCGGCGGGCGCGGGGAGCTGCTGGCCGCCACCCTTAAAGGCAAGGTGCTCGGCTTCCGCTACCAAGACCTCCGACAGAAAATCCGGCCAGTGGCCAAGGAGCTGCAGTTCAACTACATTCCCGTGGATGCGGAGATTGTCTCCATCGACACTTTCAACAAGTCACCCCCCAAGCGGGGTCTGGTTGTGGGGATCACGTTCATCAAGGATTCAGGGGACAAGGGCAGCCCCTTCCTGA…
>STRG.54045.2
GGAGGCCCGAGCGAGGGACAAGACTCCGACTCCAGCTCTGACTTTTTTCGCGGCTCTCGGCTTCCACTGCAGCCATGTCACTCCTCTTGCTGGTGGTCTCAGCCCTTCACATCCTCATTCTTATACTGCTTTTCGTGGCCACTTTGGACAAGTCCTGGTGGACTCTCCCTGGGAAAGAGTCCCTGAATCTCTGGTACGACTGCACGTGGAACAACGACACCAAAACATGGGCCTGCAGTAATGTCAGCGAGAATGGCTGGCTGAAGGCGGTGCAGGTCCTCATGGTGCTCTCCCTCATTCTCTGCTGTCTCTCCTTCATCCTGTTCATGTTCCAGCTCTACACCATGCGACGAGGAGGTCTCTTCTATGCCACCGGCCTCTGCCAGCTTTGCACCAGCG…
>STRG.54104.5
CTGGAGGGAGGAAGGGGAACTGCATCTGAGAGAGAGCAGCCAATTGGGTCCGCTGACTCTGGCCAGGTTCCCGTGCCGCGTCCAACACCCCTCACTCCCTGTCTCACTCCCCCACGGAGACTCAATTTACTTTCCATGTCCACATTCCCAGTGCTTGCGGAAGATATCCCGCTAAGAGAGAGACATGTCAAAGGTAGGGTAGATCCACATTTCCGGGCACCAAAGATGGAGATGTTCCAGGAAAGACTGCAGGGCCCCTGGGCACCTTCCACCTCCTTCCAGGCCATCACTGGCATGAGAAGGGGCAGACCCGTGTGAGCTGTGGAAGGAGGCCTCTTTCTGGAGGAGCGTGACCCCCAGTAAGCTTCAGGGGCTGCTGCTGTTGCTGCTGCTGAGCAT…
>STRG.54168.1
ATAGGGGCGGGAACAGCCCAGCGGGCCGTCCCATCGGCTTTTGGGTCTGTTACCCAAAGAATGATAAAGTTGGTTTTATTTCAAGAAGTCGATCAAAAAGAAAGCCCCAGCGCTCTAGAGCTCAGCTGACGGGAAAGGGGGTGCGCAGCCTCGAGTTTGAGAGCTACCCGGAGCTCCAAGACAGGGGTGGGTTCCAGCTGCCCGCACGCCCCGACCTTCCATCGTAGGCCGGACCATGGGAACCCCAAAGCCACGGATCCTGCCCTGGCTGGTGTCGCAGCTGGACCTGGGGCAACTGGAGGGCGTGGCCTGGGTGAACAAGAGCCGCACGCGCTTCCGCATCCCTTGGAAGCACGGCCTACGGCAGGATGCACAGCAGGAGGATTTCGGAATCTTCCA…
>STRG.54171.3
GCGGGTGAAGATGGCGGCAGCCGAGGCCGCGAACTGCATCATGGAGAATTTTGTAGCCACCTTGGCTAATGGGATGAGCCTCCAGCCGCCTCTTGAAGAAGTGTCCTGTGGCCAGGCGGAAAGCAGTGAGAAGCCCAACGCTGAGGACATGACATCCAAAGATTACTACTTTGACTCCTACGCACACTTTGGCATCCACGAGGAGATGCTGAAGGACGAGGTGCGCACCCTCACTTACCGCAACTCCATGTTTCATAACCGGCACCTCTTCAAGGACAAGGTGGTGCTGGACGTCGGCTCGGGCACCGGCATCCTCTGCATGTTTGCTGCCAAGGCCGGGGCCCGCAAGGTCATCGGGATCGAGTGTTCCAGTATCTCTGATTATGCGGTGAAGATCGT…
>STRG.54267.1
GGCTCTTGGCTCACAGCCGTCCCTTCGCTGGTGGGAAGAAGCCGAGATGGCGGCAGCCAGCGCTGGGGCAACCCGGCTGCTCCTGCTCTTGCTGATGGCGGTAGCAGCGCCCAGTCGAGCCCGGGGCAGCGGCTGCCGGGCCGGGACTGGTGCGCGAGGGGCTGGGGCGGAAGGTCGAGAGGGCGAGGCCTGTGGCACGGTGGGGCTGCTGCTGGAGCACTCATTTGAGATCGATGACAGTGCCAACTTCCGGAAGCGGGGCTCACTGCTCTGGAACCAGCAGGATGGTACCTTGTCCCTGTCACAGCGGCAGCTCAGCGAGGAGGAGCGGGGCCGACTCCGGGATGTGGCAGCCCTGAATGGCCTGTACCGGGTCCGGATCCCAAGGCGACCCGGGGC…
>STRG.54342.2
GACCCTGGATAGTCGCCGTCAGGCACTGAGGAGGCCGAGAGATGAGGCCGGAGCCCACCAAGTTCTGGGAAGTTCTTTCTGACACAAGTAAGATAACATCTCTGCCATGCCCACAGGTGCTGAGAACAAGAGAAATCAAGTGAAGGAAGGAGGCGGAGTTTCCAAGACTTGGGTGTCATCATTTCTGGGGACATCCTTGATTGGAGATTGAAGTTTTTGAACCGAAATTTAGAGCTGATTCAGAAGAGACAAATACAGAACGTCCAAGTTAGCAGTCATTTCCCAAATTTAGGAGACAATGATGCAGGCCCAGGAATCCCTAACACTGGAGGATGTGGCTGTGGACTTCACCTGGGAGGAGTGGCAGTTCCTGAGCCCTGCTCAGAAGGACCTGTACCG…
>STRG.54470.1
AGATGGCGGCGCCCAGCAGAGTCAGGTGCGGACGACTTTGTCTGTAGGAGCAGCGGCGGCTTGAGGACCCGGGGAGACCCTCAAGAATCGACCCATCAGGACGCCAGAGCTGCTTCAGCGGTGACCACCTTCTCCCTCTAACACATTCTTCCCTTCTTCACAAACGGCCCATGTCAGACGAAGGCTCAAGGGGGAGCCGCCTGCCCCTGGCGCTGCCCCCGGCCTCCCAGGGTTGCTCTTCAGGGGGCGGCGGCGGCGGCTCCTCGGCTGGGGGCTCGGGCAATTCCCGGCCCCCACGCAACCTCCAAGGCTTGCTGCAGATGGCCATCACCGCGGGCTCTGAAGAGCCAGACCCTCCTCCAGAACCGATGAGTGAGGAGAGGCGTCAGTGGCTGCAGG…
>STRG.54487.1
GGCTCAGTGCTGCCGGGCACCGGGGCGGCGGGTTGGTCTACGCTGTGCGCGGCGGACGTCGGAGGCAGCGGGGAGCGGAGCGGGGCCGCCGGGGCCTCTCCAGGGCCGCAGCGGCAGCAGTTGGGCCCCCCGCCCCGGCCGGCGGACCGAAGAACGCAGGAAGGGGGCCGGGGGGACCCGCCCCCGGCCGGCCGCAGCCATGAACTCCAACGTGGAGAACCTACCCCCGCACATCATCCGCCTGGTGTACAAGGAGGTGACGACACTGACCGCAGACCCACCCGATGGCATCAAGGTCTTTCCCAACGAGGAGGACCTCACCGACCTCCAGGTCACCATCGAGGGCCCTGAGGGGACCCCATATGCTGGAGGTCTGTTCCGCATGAAACTCCTGCTGGG…
>STRG.54491.2
AACGAAACGGTAACCAGCCCTGGGAAGCCCGCAAGAGGCCTCAGCGGTGGCCGTCCGAGAGCCGAGAGGTGAGGGTGCCCCCGCCTCACCTGCAGAGGGGCCGTTCCGGGCTCGAACCCGGCACCTTCCGGAAAATGGCGGCTGCCAGGCCCAGCCTGGGCCGAGTCCTCCCAGGATCCTCTGTCCTGTTCCTGTGTGACATGCAGGAGAAGTTCCGCCACAACATCGCCTACTTCCCACAGATCGTCTCAGTGGCTGCCCGCATGCTCAAGGTGGCCCGGCTGCTTGAGGTGCCAGTCATGCTGACGGAGCAGTACCCACAAGGCCTGGGCCCCACGGTGCCCGAGCTGGGGACTGAGGGCCTTCGGCCGCTGGCCAAGACCTGCTTCAGCATGGTGC…
>STRG.54590.2
GGGACTTCCGGCACCGCTCCGAGATGGTAATTTTGGTGGTTCTCTACCTCGGCCCACGCCGCCTGAGTTAGAAACGCTGCCTCCGGCACAGAGCGGGGGTCGCCCCGCTGCGCATCAGCCGGTGGGTCGCTGGCGCTGGTGGCAGCCGTGCCTGGGTTCCCGCCCCGGGTCGCCCGCCGCTCCCGGCCCCGCTCCGCTCACAATCCGATGGCGGCGGCCGTGCTTAGGGATTCGACTTCGGTTCCCGTGACTGCAGAAGCTAAACTTATGGGCTTTACACAGGGCTGTGTGACCTTTGAGGACGTGGCCATTTACTTCTCCCAGGAAGAATGGGGGCTCCTTGATGAGGCTCAGAGGCTCCTGTACCGCGATGTGATGCTGGAGAACTTTGCACTTATA…
>STRG.5924.1
ATTCTGAGCCGAGCCCGGTGCCAAGCGCAGCTAGCTCAGCAGGCGGCAGCGGCGGCCTGAGCTTCAGGGCAGCCAGCTCCCTCCCGGTCTCGCCTTCCCTCGCGGTCAGCATGAAAGCCTTCAGTCCCGTGAGGTCCGTTAGGAAAAACAGCCTGTCGGACCACAGCCTGGGCATCTCCCGGAGCAAAACCCCTGTGGACGACCCGATGAGCCTGCTATACAACATGAACGACTGCTACTCCAAGCTCAAGGAGCTGGTGCCCAGCATCCCCCAGAACAAGAAGGTGAGCAAGATGGAAATCCTGCAGCACGTCATCGACTACATCTTGGACCTGCAGATCGCCCTGGACTCGCATCCCACTATTGTCAGCCTGCATCACCAGAGACCCGGGCAGAACC…
>STRG.5978.1
AAAGCCAAAAGCAGATCAAAGTGGTGGGACTCGCGTCGCGGCCGCGGAGACGTGAAGCTCTCGAGGCTCCTCCCGCTGCGGGTCGGCGCTCGCCCTCGCTCTCCTCGCCCTCCGCCCCGGCCCCGGCCCCGCGCCCGCCATGGAGAAGACTGAGCTGATCCAGAAGGCCAAGCTGGCCGAGCAGGCCGAGCGCTACGACGACATGGCCACCTGCATGAAGGCAGTGACCGAGCAGGGCGCCGAGCTGTCCAACGAGGAGCGCAACCTGCTCTCCGTGGCCTACAAGAACGTGGTCGGGGGCCGCAGGTCCGCCTGGAGGGTCATCTCTAGCATCGAGCAGAAGACCGACACCTCCGACAAGAAGTTGCAGCTGATTAAGGACTATCGGGAGAAAGTGGA…
>STRG.5981.2
CTTTCCCGGAAGCTGCGCTCGCTACCCGGGTAACGGGTCCCGGCTGTGGAAGCTCCCGCGGCGCCGCGATGGACCTCGAGGAGGCGGAAGAGTTTAAAGAACGCTGTACTCAGTGTGCTGCTGTCTCATGGGGTCTTACTGATGAAGGCAAATATTATTGCACTTCTTGCCACAATGTTACAGAGAGATATCAGGAAGTTACAAACACTGATCTTATTCCTAATACCCAAATAAAAGCCCTCAACCGGGGGCTTAAAAAAAAAAACAATACTGAAAAAGGCTGGGATTGGTATGTGTGTGAAGGTTTCCAGTATATTCTTTATCAACAAGCAGAAGCCTTAAAGAACCTTGGAGTAGGCCCAGAGTTAAAGAACGATGTTTTACATAATTTTTGGAAGC…
>STRG.5948.1
AGAGGCGTACTCGGCGGCGGCGGAGCGGGCGGCAGAGCAGGGCGGCGGCGACTCGCAGGGTACCACCATCTTAAGGACAGAAAAGCTACAGGACTCTAGGAGGCCACCGTCCTGATTTGGGAAGTCCAACTTACTTTGGCCAGACAGCAGCTAAGCTGGTTCATCCCATCAGCCTGGATTGGTGAAACTGAATCACAGGAGATATTTCCAGGTTTGCTGGGATGGGAAACCTGCTCAAAGTCCTTACCAGGGAAATTGAAAACTATCCACACTTTTTCCTGGATTTTGAAAATGCTCAGCCTACAGAAGGAGAGAGAGAAATCTGGAACCAGATCAGCGCCGTCCTTCAGGATTCTGAGAGCATCCTTGCAGACCTGCAGGCTTACAAAGGCGCAGGCC…
>STRG.6154.1
AGAACTTCTTATGTGCGGCGGCGTGATGTTGGGCGGCCACAGAGAGATTGGTGTTTTTGTGAGGCAGTGAGACCTAAGGTAACCTTTATCAAAAGGATGGAGTTGGGAAAAGGAAAACTACTCAGGACTGGACTGAATGCGTTGCATCAAGCAGTGCATCCGATCCATGGCCTTGCCTGGACCGATGGGAATCAAGTTGTCCTAACTGATTTGCGGCTTCACAGTGGAGAGGTCAAGTTTGGGGACTCCAAAGTCATTGGACAGTTTGAATGTGTCTGTGGGTTGTCCTGGGCCCCACCTGTTGCAGATGATACACCTGTTCTACTCGCTGTCCAGCATGAGAAGCATGTCACTGTGTGGCAGCTGTGTCCCAGCCCTATGGAGTCAAGCAAATGGCTG…
>STRG.6202.1
GTCTCAGGCAGCGCGCACGCCGGCGTGAGAGGGCACGGGGAAAAGGTGGCTCTGGCCGGGGTGGCTCGGTTTCCTGGGGCTATGTAACTGAGCTCGTCGACTTAGGGGTCCTTCTTCGCTGCCCTCGCCGCGTGCTAGCAGGGAGTTTCCGCTCGGGAGAGAGACTGTCCTCACGCCCGCTGCGCCTCCTCGACGGCAGAGCAGGCTTGCTCGCCCGTGGGAGCGTCCCGGCCGAGAAGCCCTGAGGGGGGAGGGGAGGCCATTTTGTCCCGACCGACTCCCCGGAACCGGGCGGACGGGCTGGGAGAGGCTGCGGAGCCGCGGTCGCCGCCCTCGGAGGCACTGGACGCCGCCACTGTCGGGGCTTCCTCAAAGCTGTTCGTAGGTCGCCCGCGCCGT…
>STRG.6208.3
ACTTGGACCTGAACCTTGCTCCGAGAGGGAGTCCTCGCGGACGTCAGCCAAGATTCCAGAATGACTATCTTGACTTACCCCTTTAAAAATCTTCCCACTGCATCAAAATGGGCCCTCAGATTTTCCATAAGACCTCTGAGCTGTTCCTCCCAGCTACGAGCTGCCCCAGCTGTCCAGACCAAAACGAAGAAGACGTTAGCCAAACCCAATATAAGGAATGTTGTGGTGGTGGATGGTGTTCGCACTCCATTTTTGCTGTCTGGCACTTCATATAAAGACCTGATGCCACATGATTTGGCTAGAGCAGCGCTTACGGGTTTGTTGCATCGGACCAGTGTCCCTAAGGAAGTAGTTGATTATATCATCTTTGGTACAGTTATTCAGGAAGTGAAAACAAGC…
>STRG.6255.1
AGAGCGGGGTCCCGGCACCGCGGCGCTCGGGTGTTTTTGGGGGCCCGGGTGGAGGGCCCGGGTGCCGGGGCCCAAGGTGCGGCCTCGCTAGCGGGAGAGGGAGCGGGATCACCGGCCCGGAGAGAGCTCTCAGGGCCAGAGCGGGGCAGGAGGATGCTTTCCCAGCCCCACCATGGAGCTGCGCTGTGGGGGATTGCTGTTCAGTTCTCGCTTTGATTCAGGGAATCTAGCCCACGTGGAGAAGGTGGAATCTTTGTCCAGTGATGGGGAAGGGGTAGGAGGTGGGGCGTCAGCCCTGACCAGTGGCATTGCCTCTTCCCCTGACTATGAATTCAACGTGTGGACCCGACCAGACTGTGCTGAAACGGAATTTGAGAATGGGAACAGGTCATGGTTCTA…
>STRG.6267.1
GAGTTTCTGCGAAGCCGCGACCTCGGCGTCCGGACGCGGGGAACACCGGGCTGAGGGAGTCTGCAGTCGGCTCCGGGAAGCCGCGCGGCGACGGGGGAGGCCTTCACTAAAGGGGAAAAGGAAGAGGGGGTCGGCCAGTATCCCCGAAAGAGGGCTAGGGCGCATGAAGACCAGCGCAGAGCTCCACGAGCAGGAAAAGCCCCCAAGCAGCCCCAGGGCGACTGGACCGGGCCGCTTAGGCCACGCCCGGGGAAGAGGGCCTGACGCGCTGCGGGGCGGGGCCGCGGGGCCGGGTCGCGCGAGCAGCGGAGCACCAAGGGAACGGAAAATGGCGCCTCACGACCCGGGTAGTCTTACGACCCTGGTGCCCTGGGCTGCCGCCCTGCTCCTCGCTCTGGG…
>STRG.6278.2
CATCGGATCGCAGGGCTCCCAAAATGGCGAGTGAGGCTGCGGGGACTCGCTGAGCAGCGGAGGGGGAGCGTGCAGAGCCGCTGCGGCCCTCACAGTCCGGAGCCCGGCCGTGCCGTGCCGTAGGGAACATGCACTTTTCCATTCCCGAAACCGAGTCCCGCAGCGGGGACAGCGGCGGCTCCGCCTACGTGGCCTATAACATTCACGTGAATGGAGTCCTGCACTGTCGGGTGCGCTACAGCCAGCTCCTGGGGCTGCACGAGCAGCTTCGGAAGGAGTATGGGGCCAATGTGCTTCCTGCATTCCCCCCAAAGAAGCTTTTCTCTCTGACTCCTGCTGAGGTAGAACAGAGGAGAGAGCAGTTAGAGAAGTACATGCAAGCTGTTCGGCAAGACCCAT…
>STRG.6293.1
GCAGAAGGCGGCGGCTGGCTCTCCGGGACGGTCACATCCCGCTGCAGGGGCGGGCGGAGGCCGCCGCACTGCCTCCCGCACCGGGGACCCAGGCCAGCGTCCGGGCAACGCCCCCTGCTCCCGGACAGACTCCGTGGCCCGCTCGAGCCCTGGGGGCTCCGCAGACCCGCGCCCGCTCCGCCCGCAGCTCGGCCCCGCGCTGCCCGCGTCGCCGGGCCCGCGCCGGGATGGGGTAGGGGCAGCGCCACCGAGTCGGGCGATGGGCCGCCCTCTGGGCACCGAGCAGCCCCCCGAGGCCTGACCAACCGCGAGGACCGGCGGAGGAGCCCCGCCTGGATGTCAAGCGGATGCCAAGCGGATGCCACAGTTCCCCCCCCAGCGGACTCCGTGGGGACATGG…
>STRG.6301.10
ATTGCGGAAGTTTCTCTACCCATGCGGTGTCTCTATGGTCGGGTGGGTGGGGCCAGGAGGAAGATGGCGGCGTCCGCAGCTGCCGCTGAGCTCCAGGCTTCTGGGGGTCCGCGGCACCCAGTGTGTCTGTTGGTGTTGGGAATGGCGGGATCCGGGAAAACCACTTTTGTACAGAGGCTCACAGGACACCTGCATGCCCAAGGCACTCCACCGTATGTGATCAACCTGGATCCAGCAGTACATGAAGTTCCCTTTCCTGCCAATATTGATATTCGTGATACTGTAAAGTATAAAGAAGTAATGAAACAATATGGACTTGGACCCAATGGCGGCATAGTGACCTCACTCAATCTCTTTGCTACCAGATTTGATCAGGTGATGAAATTTATTGAGAAGGCC…
>STRG.6328.5
GCGGAGCTGGGCGGTGCCGAGGAGGAGGAGGTGGCGGCCTGGGTCTGACGCGGCCCTGTTCGAGGGGGCCTCTCTTGTTTATTTATTTATTTTCCGTGGGTGCCTCCGAGTGTGCGCGCGCTCTCGCTACCCGGCGGGGAGGGGGTGGGGGGAGGGCCCGGGAAAAGGGGGAGTTGGAGCCGGGGTCGAAACGCCGCGTGACTTGTAGGTGAGAGAACGCCGAGCCGTCGCCGCAGCCTCCGCCGCCGAGAAGCCCTTGTTCCCGCTGCTGGGAAGGAGAGTCTGTGCCGACAAGATGGCGGACGGGGAGCTGAACGTGGACAGCCTCATCACCCGGCTGCTGGAGGTACGAGGATGTCGTCCAGGAAAGATTGTGCAGATGACTGAAGCAGAAGTTCG…
>STRG.6234.1
GCTGAGTGCTCAGTGGAGAGCGGGGAGTTGTGTCCACCTTGCCGACGTCGCTAGCCGTGGGGCTGTCCTGGGAAGGCGGACGGCGAGCGCCCGGTGTCCGCACTCGGCCGCCTGCCGTGCCCGTCTGCGCCCGTGTCATCCTCACTCGGGACGCAGGGACCGTTTTTAAATCACAGGGGCGTGTGTCAGCCTGCCCTAGGACTTCATGTCTATATATTTCCCCATTCACTGCCCCGACTATCTGAGATCGGCCAAGATGACTGAGGTGATGATGAACACCCAGCCCATGGAGGAGATCGGCCTCAGCCCCCGCAAGGATGGCCTTTCCTACCAGATCTTCCCAGACCCGTCAGATTTTGACCGCTGCTGCAAACTGAAGGACCGTCTGCCCTCCATAGT…
>STRG.6481.2
GCAGTCCCCCTTGAACGCACCTCAGGATGGCCCGTACTTTGGAACCACTAGCAAAGAAGATCTTTAAAGGAGTTTTGGTAGCCGAACTTGTAGGCGTTTTTGGAGCATATTTTTTGTTTAGCAAGATGCACACAAGCCAAGATTTCAGGCAAACAATGAGCAAGAAATATCCCTTCATCTTGGAAGTTTATTACAAATCCACTGAGAAGTCTGGAATGTATGGAATCAGAGAGCTAGATCAAAAAACATGGTTGAACAGCAAAAATTAGATCCAGTCATCACGTTCAGCCTCCCATCTAAGCTGTTTGAGACCTTTGAGAGAAGAAGAAAAGATGAGTGTACTACCACACTGTAGACTCTTGGTGGTCCCACAGAACATGCTGCTGAGTCACAGGAACT…
>STRG.6499.2
AAATCGGTACAAGATGGCGGAGGGGGACGAGGCAGCGCGAGGGCAGCAACCGCACCAGGGGCTGTGGCGCCGGCGACGGACCAGCGACCCAAGCGCCGCGGTTAACCACGTCTCGTCCACGACCTCCCTAGGTGAGAATTATGAAGATGATGACCTAGTAAATTCTGATGAGGTTATGAAGAAACCATGTCCAGTACAGATTGTTCTTGCTCATGAAGATGACCATAACTTTGAACTTGATGAAGAAGCTTTGGAGCAGATATTGCTACAGGAGCACATACGAGATCTTAACATAGTAGTGGTATCTGTGGCAGGAGCTTTTCGTAAAGGGAAGTCATTTCTACTGGACTTCATGCTTAGATACATGTATAACAAGGATTCTCAAAGTTGGATTGGTGG…
>STRG.6512.1
ATCCTTAGATTCGCTCCTCCGGGCAGGGAGCGGAGACGGAGGAGGAGGAGGGAGAGGCTGAATGTTGGCTCGGTAATTGAGAGGAGCGGCCGCTCCAGAGCTTCCTCCCGGGGCGCCCCCCTCAGTCCGTCCGCGCTTCTCAGCCGCCAGTCTCCTGGCCGCGCAGTCCCCGCGGACGGCCGGGCCGCGGAGACCCTCGCAGAAGAGGCGCTGCCGGCGGCGAGGACTGGCCGGCGGCATCCGAGGCGCGCGCCCCACCGCCACCCCCACCCGCCTGCCAGCCGGTCCCTCCGGCCGCCGCCATGTCCTCCTCCTCTTCCTCCCCCAGGGAGACGTACGAGGAGGACCGGGAGTACGAGAGCCAGGCCAAGCGTCTCAAGACCGAGGAGGGGGAGATCG…
>STRG.6423.1
AGGCAAGTGTCAGGCCGATGTGTCGCCCGCGAGGGGCCGGGGTCGGGGCCGCCGGGGCCATGCGCGCGGGCTGGGCAGGGGGCCGGCGGGGCGCAGAGCGGAGCCGCCTCGGAGCCTGAGCCGCCCGGGGCCGGGGCCGGGGAGCCGCGCGGGGCCGGCCGGCCGGGGGGAGGGGAGCGATGCGGCGCCGGCGGGCGGCAGTGGCCGCGGGTTTCTGCGCCTCCTTCCTGCTGGGCTCCGTCCTCAACGTGCTCTTCGCTCCGGGCTCGGAGCCTCCGAGGCCAGGCCAGTCCCCTGAGCCTTCGCCGGCCCCGGGTCCGGGCCGTCGCGGGGGCCGCGGGGAGCTGGCCCGGCAGATCCGGGCGCGCTACGAGGAGGTGCAGCGCTATTCCCGCGGGG…
>STRG.6682.1
ACTGCAGCTGCTGCTGCCTGCTGGTTGCCGCGTCTTCCCGGAGGCGACTGCTGGAAGCTGCAGGGAACAGCTGCGGTGCTCTGCCATATTGTGTCTTCCCCGGCCGGTCCCTCGCCTCCCGGCCGAGCTGACGTTGGTTGAAGCCATGGATAACAGAACCCACAGATGCAGAGGGCTGACTGTACAAGTCTGTCAAAAAACCAAACTGCTGGTTGGCTAATAATTGGTCACTGTATGACTTATAGTACAGGTGATATTACTTCTGATTCTAGATGAACTGTAAGAGTAAATGGGTCCAGTAATTGGAATGACTCCAGATAAGAGAGCTGAAACCCCAGGAGCTGAAAAGATTGCAGGATTAAGCCAGATTTACAAAATGGGAAGCTTGCCTGAAGCTGT…
>STRG.6897.1
AGACCTGAAGGCTGCTTCCGCTAACCCGGGCTGGCGCTGCTAACCTCACCCAACGATCCCTGCTGTCGGAAAATGTCCAGAGGCACCATCCCTGCTATGAAGAGGGAATGCCAGTACAACAGCCACAAGGGGTCTTCCTGTGGCCCTCAAACAAAAAATCACTGCATTACATCAGCAGACTGCATTGGAGAGAAAGGCGCCGGGACAGAAAAGCCTGAGATAAACCACCTGTCATTCTTGGAGAAAAGGATGCTGCGGCTTTCCCGATTTGGTTGATGAGATGGAAAATCAACCCTTACAGGAAGGACATCACCAATTCCGGAAAGGATGCTGCGCCAGTCATGTTTCCGCACTCTGTGAGACGTTGAAATCTCCAGAAGTTGCCCAAGGTTTTCAAGC…
>STRG.6957.2
GATAAGTTGGGACGACCGGACAGCTTCTCAGGTTGCTAAGCGACGAGGCGGGAGCGCACGCACACCCTGGCTGCTTTGTAGCACCTGAGGAAACTGTGGCGGCGGCGGCGGCGTCCTGGAGACCCAAGAGACCAAGCGAGCGTGTCGCTCCCTCTCGGGTCCGAGGACCTAGCCTAGGAACCTTCTGCCCGGGGTAGTGTCTGGTGATGAGGCGAGAGTTTTGCTGGGACGCCTACTCCAAAGCGGCCGGGAGTCGCGCTTCTTCCCCACTCCCGAGACAGGATAGAGATTCCTTCTGCCATCAGATGTCTTTCTGCTTGACTGAACTGCACCTGTGGTCTTTGAAGAATACCTTACACATTGCGGATAGAGACATTGGGATCTACCAGTATTATGACA…
>STRG.6835.1
GTTCCCGGTTCCCGAGCCGGGCCCCGGAGGCCTTTAAATGCTGCCCAGGGCCGACGCGGCACGGCCCTCGCCACTTTTCTTGGTCGGGCAGCGGCAGCGGCAGCGGCAGCAAGCAGCCCCGTCGGCCCGGGTCCGGGGCCGTTCTGGGCCGCGGCAAGCACCTTCGCCCTCCCAGCTCGCGCTGCCTCCCTCCCCTCCCCTCCTCCCAGGCTCTGCCTGCCAGGTCGGCGCCGGGCCCCGGGCGCGCGCGCGCGCGCCCCCTCGTGTGTGCGCGCGCCCGCCGCCAGCTCGGACCCGCGCCCCCGCCCCCGCCCCGCGCAGGACAGCCCCGGGATCCCCGCCCGCGCGCCGCGTCCCACGTACCCCGCCGCGCCGGGCAAGAAGATGGCGGGATCAGTG…
>STRG.6983.1
GGGAGACTGGAGTCGAAGGCCGTGAGGTATTTTTCTAAGTCAGCCATAATGGCAGGTGAAGAAATTAATGAAGACTATCCAGTAGAAATTCACGAGTATTTGTCAGCGTTTGAGAATTCCATTGGTGCTGTGGATGAGATGCTGAAGACCATGATGTCTGTTTCTAGAAATGAGTTGTTGCAGAAGTTGGATCCACTTGAACAAGCAAAAGTGGATTTGGTTTCTGCATACACATTAAATTCAATGTTTTGGGTTTATTTGGCAACCCAAGGAGTTAATCCTAAGGAACATCCAGTAAAACAGGAATTGGAAAGAATCAGAGTATATATGAACAGAGTCAAGGAAATAACAGACAAGAAAAAGGCTGGCAAGCTGGACAGAGGTGCAGCTTCAAGATTT…
>STRG.6996.2
AGTGTCCACCTCACGTAGCTGGCCGAGGCGGTATCCAGATTCCGGGGGTCTCGCTCCTTGGCATAGTGGTCGCTTAACTCCAGCGCCTTCCCAGTGCCTCCCAAACCTCTCCTCCTCCTGCCCGGGGCTGTTCTAGGAGGAGCCTAAATGTCCGCTTCCCCAGCTGAAGGGGATTGTGGTGCGTAAACAGGATTAACTCCCTCGCCCCCAGCTGCGCGGATCTGCGCGGCGGCCTGCGGGCCAGAGCGAGCCTTCGGGTGCGTGGAGGGCGCAGCACTGGAGCGGGGGATGGGGAAGCGCGCGGCCTTGGAGCCGTCTCTTGGGCCCGCTTCCTCGCCGAGTGGGGAGGGGGGCCACAGCCTAAGGAGCTGCTCCTCAAAAGCCCGGGCGGACGGCGGC…
>STRG.7134.1
AGCGCCGCCGGCGGAGAACAGGAGCATGGAGGGCGGGCTGGGGCGTGCTGTGTGCTTGCTGACCGGGGCCTCCCGCGGCTTCGGCCGGACGCTGGCCCCGCTCCTGGCCTCGCTGCTGTCGCCCGGCTCCGTGCTTGTCCTTAGCGCCCGCAACGACGAGGCACTGCGCCAGCTGGAGGCCGAGCTGGGCGCCGAGCGGTCTGGCCTGCGCGTGGTGCGGGTGCCCGCCGACCTGGGCGCCGAGGCCGGCTTGCAGCAGCTGCTCGGCGCCCTGCGCGAGCTCCCCCGGCCCAAGGGGCTGCAGCGACTGCTGCTTATCAACAACGCGGGCTCTCTTGGGGATGTGTCCAAAGGCTTCGTGGACCTGAGTGACTCCACTCAAGTGAACAACTACTGGGC…
>STRG.7172.4
GGAAGTGATCGCTGTGTGAATCGTGGGTGGGATGGCCGCGGGCCGCCTCTTTCTAAGTCGGCTTCGAGCACCCTTCAGTTCCATGGCCAAGAGCCCACTCGAGGGCGTTTCCTCCTCCAGAGGCCTGCACGCGGGGCGCGGGCCCCGAAGGCTCTCCATCGAAGGCAACATTGCTGTGGGAAAGTCCACGTTTGTGAAGTTACTCACGAAAACTTACCCAGAATGGCACGTAGCTACAGAACCTGTAGCAACATGGCAGAATATCCAGGCTGCTGGCACCCAAAAAGCCTGCACTGCCCAAAGTCTTGGAAACTTGCTGGATATGATGTACCGGGAGCCAGCACGATGGTCCTACACATTCCAGACATTTTCCTTTTTGAGCCGCCTGAAAGTACAGCT…
>STRG.7201.3
TTTCTAGTCCCCTTTCCTCGCAGGACCTCATGAGTAAGCTGTGGCGGCGTGGGAGCACCTCTGGGGCTATGGAGGCCCCTGAGCCGGGAGAAGCCCTGGAGTTGAGCCTGGCGGGTGCCCATGGCCATGGAGTGCACAAGAAAAAACACAAGAAGCACAAGAAGAAACACAAGAAGAAACACCATCAGGAAGAAGACGCCGGGCCCACGCAGCCGTCCCCTGCCAAGCCTCAGCTCAAACTCAAAATCAAGCTTGGGGGACAAGTCCTGGGGACCAAGAGTGTTCCTACCTTCACTGTGATCCCAGAGGGGCCTCGCTCACCCTCTCCCCTTATGGTTGTGGATAATGAAGAGGAACCTATGGAAGGAGTCCCCCTTGAGCAGTACCGTGCCTGGCTGG…
>STRG.7277.1
GGATGTGAGGGCGATCTGGCTGCGACATCTGTTACCCCATTGATCGCCAGGGTTGATTCGGCTGATCTGGCTGGCTAGGCGGGTGTCCCCTTCCTCCCTCACCGCTCCATGTGCGTCCCTCCCGAAGCTGCGCGCTCGGTCGAAGAGGACGACCATCCCCGATAGAGGAGGACCGGACTTCGGTCAAGGGTACACGAGTAGCTGCGCTCCCCTGCTAGAACCTCCGAACAAGCTCTCAAGGAAAGAATTCGAGGGCGAGCTGGTGGTGTTAAACAGCAACTTTTATTGAAGCGGCAATGCACACAGTAGGAGCAGAGGTGCTGCTCCTTGTG
>STRG.7377.1
ACTGCGGCCGCTCCGCAGGCAGAGAAGCCGGGAGCGGGCGAGGCGGCGGCGGCAGCAGCGATGGCAGGAATAGAGTTGGAGCGGTGCCAGCAGCAGGCGAACGAGGTGACGGAAATTATGCGTAACAACTTCGGCAAGGTCCTGGAGCGTGGTGTGAAGCTGGCCGAACTGCAGCAGCGTTCAGACCAACTCCTGGATATGAGCTCAACCTTCAACAAGACTACACAGAACCTGGCCCAGAAGAAGTGCTGGGAGAACATCCGTTACCGGATCTGCGTGGGGCTGGTGGTGGTTGGTGTCCTGCTCATCATCCTGATTGTGCTGCTGGTCGTCTTTCTCCCTCAGAGCAGTGACAGCAGTAGTGCCCCACGGACCCAGGATGCAGGCATTGCCTCAGGG…
>STRG.7640.1
AACGCCGGGCAGGGCGGCGGGCGCGCTCAGTCTGGCGGCGGCTGCCGTGAGCTGACTGACGTTCCGGGAACGCCGCAGCAGCCCGCGCCGCCCGCAGCCTAGCCGAGCCGCGCCGCCCGGGCCTCGCCCGCCCGCCTGCCCGCCATGGTGTCATGGATCATCTCCAGGCTGGTGGTGCTTATATTTGGCACCCTTTACCCTGCGTATTATTCCTACAAGGCTGTGAAATCAAAGGACATTAAGGAATATGTCAAATGGATGATGTACTGGATTATATTTGCACTTTTCACCACAGCAGAGACATTCACAGACATCTTCCTTTGTTGGTTTCCATTCTATTATGAACTAAAAATAGCATTTGTAGCCTGGCTGCTGTCTCCCTACACAAAAGGCTCCAGC…
>STRG.7792.1
GTGGCAGTCGCGGAAGGCGCGGGAGCTTGCGTGCTGCTGGGCCTGAGCTGTCTGTCTCGTTTCTGTCCGCGCGCCCTGCATCCCGGCCCCGGGCGCCCGCTGGAGGTCGCCGAGGAGCCACAGGGCTGACTGGTCTGCTGCCCGGGCCCAGGAGTGCCTGGTGTAGCAGTCGCGGAGCCATCCCGGCGTCTGCTGCCATGACCGACTCTCCCCTCAGAGGAGACTCTTCCTCAGCGGTGGCTGCAGAGACAGATGAGCGGCGGCTCCTGGCCGCGGGACCGTGAGACGGGTTCGTGGCCGGCCATTTAGGGGGACGCTGCGACCACCGCCTGCGCCCCTCCGGACTGGTTCCTTGGGCCCCGGAAGCTCGCGGCGGGCCCTGCGGGAGGCGGCATGCTC…
>STRG.7821.1
GATGAAGGGTCGTTGGTGGGAAAGATGGCGGCGACTCTGGGACCCCTTGGGTCGTGGCAGCAGTGGCGGCGATGTTTGTCGGCTCGGGATGGGTCCAGGATGTTACTCCTTCTTCTTTTGTTGGGGTCTGGGCAGGGGCCACAGCAAGTCGGGGCGGGTCAAACGTTCGAGTACTTGAAACGGGAGCACTCGCTGTCGAAGCCCTACCAGGGTGTGGGCACAGGCAGTTCCTCACTGTGGAATCTGATGGGCAATGCCATGGTGATGACCCAGTATATCCGCCTTACCCCAGATATGCAAAGTAAACAGGGTGCCTTGTGGAACCGGGTGCCATGTTTCCTGAGAGACTGGGAGTTGCAGGTGCACTTCAAAATCCATGGACAAGGAAAGAAGAATCTG…
>STRG.7773.1
GCAGCCGCCGGCAGCTACTGCAAGGCAAAAGCCGGAGTGGACGTGTCTTTTGAAACTGCTGCTCTTTCACTTCTCAGGCGTCACCGAGAGCTCAGCACCCAGGCTGAACTCTGTACCATTTGGAAGAATGGAAGCTGATGCATCTGTTGACATGTTTTCCAAAGTCCTGGAGCATCAGCTGCTTCAGACTACCAAACTGGTGGAAGAACATTTGGATTCTGAAATTCAAAAACTGGATCAGATGGATGAGGATGAATTGGAACGCCTTAAAGAAAAGAGACTCCAGGCACTAAGGAAAGCTCAACAGCAGAAACAAGAATGGCTTTCTAAAGGACATGGGGAATACAGAGAAATCCCTAGTGAAAGAGACTTTTTTCAAGAAGTCAAGGAGAGTGAAAA…
>STRG.8165.1
CCCTTCCCCGTCGCGGAGGCAGCCTAGCCTCGCGCCCCGCCCGTTGCTTCTGCCCTCCGGCCTTCCCGCCGCCGTCGCCGGGACCAGCCGCTCGGGGCCGGGCTGATACAGCCGCTTCACCGTGCCCCTGCCCGCGACCATGGCCTCCTCCGAGGTGGCGCGGCACCTGCTCTTTCAGTCTCACATGGCAACGAAAACAACTTGTATGTCTTCACAAGGATCAGATGATGAACAGATAAAAAGAGAAAACATTCGTTCGTTGACTATGTCTGGCCATGTTGGTTTTGAGAGTTTGCCTGATCAGCTGGTGAACAGATCCATTCAGCAAGGTTTCTGCTTTAATATTCTCTGTGTGGGGGAAACTGGAATTGGAAAATCAACACTGATTGACACATTGTT…
>STRG.8332.6
AAACAAAGTTGCTCAGACAAACAAGCCGATGCAGACGAGCGCCATGGCCCTGCTGGCGCGGATCCTGAGAGCCGGGCTGCGGCCGGCGCCCGAGCGGGGTGGGCTCCTGGGCGGCGGGGCCCCGCGGCGGCCTCAACCCGCGGGCGCACGGCTCCCGGCGGGGGCGCGGGCCGAGGACAAAGGCGCCGGGCGGCCGGGGTCGCCGCCGGGAGGGGGCCGAGCCGAGGGTCCCCGGAGCCTCGCCGCCATGCCGGGGCCGAGGACCCTCGCCAACCTGGCGGAGTTCTTCTGCAGGGACGGCTTCAGCCGCATCCACGAGATCCAGGGAGGGTGAACAGTGGCTCAAGATGAGAAGCGTATTGAGACAAAGAATTCTGAAACCGAAAGATGTGGCCATTT…
>STRG.8358.1
AGCTTTTCCTTTCTGCCACCGCCTTGTCCAAGATGGCGGACCTCCACCGCCAGCTGCAGGAGTACCTGGCGCAGGGGAAAGCTGGCGGCCCGGCGGCCGCGGAGCCGCTGCTCGCCGCGGAGAAGGCGGAGGAGCCCGGGGACCGGCCGGCGGAGGAGTGGCTGGGCCGCGCGGGCTTGCGCTGGACGTGGGCGCGGAGCCCTGCGGAGTCGGCAGCGGCCGGCCTGACGTGCCTCCCGAGCGTGACGCGCGGGCAGCGGCTGGCGGCGGGCGGCGGGTGCCTGCTGCTGGCTGCACTGTGTTTCGGCCTAGCCGCGCTCTACGCACCGGTGTTGCTGCTGCGCGCGCGCAAGTTCGCGCTGCTCTGGTCACTGGGCTCGGCGCTGGCGTTGGCGGGAA…
>STRG.8363.1
GCTCCGCGCTTCTGCTTCCGGCGGCGCTGGTGGTGGCGCGCGGCGCGGCGCGGCGATGGCGGCGGGTGGCAGCGATCCGCGGGCTGGCGACGTAGAGGAGGACGCCTCACAGCTCATCTTTCCTAAAGAGTTTGAAACAGCTGAGACACTTCTAAATTCAGAAGTTCATATGCTTCTGGAACATCGAAAGCAGCAGAATGAGAGTGCAGAGGACGAACAGGAGCTCTCAGAAGTCTTCATGAAAACATTAAACTACACAGCCCGTTTCAGTCGTTTCAAAAACAGAGAGACCATTGCCAGTGTTCGTAGCTTGCTACTCCAGAAAAAGCTTCATAAGTTTGAGTTGGCCTGTTTGGCCAACCTTTGCCCAGAGACTGCTGAGGAGTCCAAGGCTCTAAT…
>STRG.8408.1
GACAAGGAAGAAGGTGGCTCCAGATCTGGAGGTGTGTCCATGGCGGCGCTTGACCTGCGAGCGGAGCTGGATTCGCTGGTCCTGCAGCTGCTTGGGGACCTGGAGGAGCTGGAGGGGAAACGAACGGTGTTGAACGCCCGGGTGGAGGAGGGCTGGCTCTCGCTCGCCAAGGCTCGCTACGCGATGGGCGCCAAGTCGGTAGGGCCCCTGCAGTATGCTTCCCACATGGAGCCCCAGGTCTGCCTCCACGCCAGCGAGGCCCAGGAGGGACTCCAGAAGTTCAAGGTGGTGAGAGCTGGTGTCCACGCCCCAGAGGAGGTGGGGCCTCGCGAAGCAGGTCTGCGGAGGCGCAAGGGCCCCACTAAGACCCCAGAACCGGAGTCCTCTGAGGCCCCTCAG…
>STRG.8542.1
AGTTTGTTGGCTGCGGCAGCAGGTAGCAAAGTGACGCCGAGGGCCTGAGTGCTCCAGTAGCCACCGCATCTGGAGAACCAGCGGTTACCATGGAGGGGATCAGTATATACACTTCAGATAACTACACCGAGGAAATGGGCTCAGGGGACTATGACTCCATGAAGGAACCCTGTTTCCGTGAAGAAAATGCTAATTTCAATAAAATCTTCCTGCCCACCATCTACTCCATCATCTTCTTAACTGGCATTGTGGGCAATGGATTGGTCATCCTGGTCATGGGTTACCAGAAGAAACTGAGAAGCATGACGGACAAGTACAGGCTGCACCTGTCAGTGGCCGACCTCCTCTTTGTCATCACGCTTCCCTTCTGGGCAGTTGATGCCGTGGCAAACTGGTACT…
>STRG.8621.2
AGTTCTAACCTGCTCTGCAGGAATAACGGTCCTGCCTCCCGACACTCTTGGCGAGGTTTTTGTACAGTTTGCTCCGGGAGCTGTTTCTTCGCTTCCACCTTTTTCTCCCCCACACTTCGCGGCTTCTTCATGCTTTTTCTTCTCACCATTTCTGGCCAAAACTACAAACAAGACTTCGCAGATCGAGCCTGCGTGCTGCCGAAGCAGGGCGCCGAGTCCATGCGAACTGCCATCTGATCCGCTCTTATCAATGAAGCAGCCGATCATGGCGGATGGCCCCCGGTGCAAGAGGCGCAAACAAGCCAATCCCAGGAGGAAAAACGTGGTGAACTATGACAATGTAGTGGACACAGGTTCTGAAACAGATGAGGAAGACAAGCTTCATATTGCTGAGGATGA…
>STRG.8638.1
AGTGGTTGTGTACGGTCCGCAGCGGCAGGTGAAGTCTAGCAGAGGACGCGGCCAGGCGATTCGGTGAAGCGATTCCTGCAGGCGTTGGTTCCCCTCTTTGACCTGGATTTGAATTTGTTGAAATGAGCAGTCGTAAATCAAAGAGTAACAGCTTAATTCACACAGAGTGCCTTTCACAGGTACAAAGAATTTTACGTGAAAGATTTTGTCGTCAGAGTCCACATAGTAACCTATTTGGAGTGCAAGTACAATACAAACACTTAAGTGAGCTGCTGAAAAGAACTGCTCTCCATGGAGAGAGTAACTCTGTCCTTATTATCGGACCCCGAGGATCAGGAAAAACTATGTTAATAAATCATGCTTTGAAAGAACTCATGGAAATAGAAGAAGTGAGTGAAA…
>STRG.8651.1
CCTTTGCCTGCTCACCGCCAGCGTAGGTGCTACCACCGCTGCCGTCGCCGCCGCCATTTTGATGGCAGGAAGAGTCCGGTTCTGGGACAGCTGGAGACAGTGGTGGTGACTGAAATAACTTTACCAAAGGAAAGCTATTTTGCGAACTATCTTCTCCAGCGGAGATGGCCAATGTGCTTTGTAACAGAGCCAGACTGGTTTCCTATCTCCCAGGATTTTGCTCTTTAGTTAAAAGGGTTGTCAATCCCAAAGCCTTTTCGACTGCAGGATCATCAGGTTCGGATGAGTCTCATGTGGCTGCTGCACCTCCAGATATATGCTCTCGAACAGTGTGGCCTGATGAAACTATGGGACCCTTTGGACCTCAAGATCAGAGGTTCCAGCTTCCTGGGAACATAG…
>STRG.8711.5
GCGCCATGTCGTTTGCTGAGAGCGGGTGGCGGTCGGCTCTGCGGCGCCGCGGTCCCGGCACCCCGGGCCCTGTGGCTCGGCCATCGTATTCCTCCTTTACTCAGGGGGACAGCTGGGGTGAAGGCGAAGTCGACGAGGAGGAGGGATGCGACCAAGTGGCCCGCGACCTGCGGGCGGAGTTCTCGGCTGGGGCGTGGTCAGAGCCCAGAAAGCGCTCGGTGCTCCCGCCGGACGGGAACGGGTCGCCCGTTCTGCCCGATAAGCGCAATGGTATCTTTCCCGCGGCCGCGGGCAGCAGAGCCCAGCCTCGGCGGTGGCCGGTCCAGGTCCTCTCTATTCTCTGCTCGCTGCTCTTCGCCATTCTTCTCGCCTTCCTCCTCGCCATCGCCTACTTGATCG…
>STRG.8747.2
GAGTGACAGCCCCGCGCGCCTCGCTGGGAGCACCCGGGCCGAGGCTCTGATTCTGGGGGGAGGCCGACTCCACCCTGGCTGGAGGAACTGGGTGCTCCTGCCCGCTGGCCCCTCGCGCGTGAGGATCTATCTCAGGCTAAGAAATGGCATTTCAAAAGGCAGTGAAAGGGACGATTCTTGTTGGAGGAGGTGCTCTTGCAACTGTTTTAGGACTTTCTCAGTTTGCTCATTACAGAAGGAAACAAATGAACCTGGCCTATGTTAAAGCAGCAGACTGCATTTCAGAACCAGTTAACAGGGAGCCTCCTTCCAGAGAAGCTCAGCTACTGACTTTGCAAAACACATCTGAATTTGATATCCTTGTTATTGGAGGAGGAGCAACAGGAAGTGGCTGTGCGC…
>STRG.8782.2
GTCTTTCTAGCCTCCGCCTCCAGGCGGGTGAGGAGGTGACACCTGAGAATTCCTCCCTCTCACCCCTGACCCTGCCGGAAAGCGAAACTGAGATGCGGGCATTGGGCCCTGGGAAGCGTGGGGAAGGGGAAAGGAGAAAGCCAGGTTAACTACGTCAGGATTAATGTGTTCCACTTCTGCTGCCTGAGATCAAGTCTTTGTTGTCTTGCTGAGTTTTGTCTGTTTCATGGAACACAACAATACACTCTACAGGAAGAACTTTAACTAAAAAGCCCTTATATTTCGATTCCAGAAAATGGAGAAATTAAGTCCTTTCCATGGATCATTCCTTCTGTAAACAGAGATCACAAAGCAAGAGCTTCAGCATCCTCGTGAAAAAGACATTTTGTTCTGGGTGTC…
>STRG.8853.2
AGAGCCATCGCCGGGGAAGCGCAGCCGGGCTCGGGTGCTTCGGCTGCCGCCGCGGCTGCTCGGCTAGTGCAGCTGGGCGAGCTCGCGCGGGCGCCGCCGCCGCCTCTGCTGCTGCCCACCCCGCCGCGCCGCCGGCGCTGCCGGTCTTGCAGGCGGCCGCCGGGGAGGGGCGGCCGAGAGAGCGGAGCACGAGGAGGCGGGGGCGGCAGAGAAGTGATGCTGGCGCCGGGGATCGGGGCAGCGGCAGCGGAGCAGCAGCATCTTCGGGACCCTGGCTGCAGCGTCCCTGTGGCCCGCGCGCCAGCCCAGCGGCCGGAGACCACGCGCCCCGCGGACCCATTAGAAACGCTTCAAGAGCTGCTCAGTCCAGGAGTGGAGGGATTTTGTGAAGACACAGAT…
>STRG.8873.2
ATGTCTCTCGAAGAAAGGTTATAAACCCTGAGATATGAGGGTTGGGCGAGACATCCGAGCCTGTTTCGTTCCGTGTTGGGACCAGGAATAACCCTGACTTCTGAGCTTTCATAACCCCAGGATCCTCCAGAAAATTTGCGGCGCGCTGAGGGAAAACCTTGCTGAAGCTGTACATTGGAATGCGTTTACAGTCATTGTAATGGAAGCAAAATACATGAAGGAAAAACTGTTATTTGTATCCCTGCTTATTGCACCTGACGACTAGTTGCAGATGGTTTTGTTTACCTAAGAAAACTTGTGATATAAATGAAAAAAACACCTGTTTTCCTAGAGTCATTGGTTACAAATATGCTTCGTCTAAGAGCTATTTGTCCATTCTCCTGGAGAGTGTTTCAATTT…
>STRG.8936.2
GCCACTACCCAGAGGGCTGCCGCCGCCTCTCCAAGTTCTTGTGGCCCCCGCGGTGCGGAGTATGGGGCGCTGATGGCCATGGAGGGCTACTGGCGCTTCCTGGCGCTGCTGGGGTCGGCACTGCTCGTCGGCTTCCTGTCGGTGATCTTCGCCCTCGTCTGGGTCCTCCACTACCGAGAGGGGCTTGGCTGGGATGGGAGCGCACTAGAGTTTAACTGGCACCCAGTGCTCATGGTCACCGGCTTCGTCTTCATCCAGGGCATCGCCATCATCGTCTACAGACTGCCGTGGACCTGGAAATGCAGCAAGCTCCTGATGAAATCCATCCATGCAGGGTTAAATGCAGTTGCTGCCATTCTTGCAATTATCTCTGTGGTGGCCGTGTTTGAGAACCACAAT…
>STRG.8974.1
GCCGGGCTCCGGCTAGGAGGGTGGGGGCCGCGCCGGTGACAGCCGATCCCCGCCCCTGCTGCCCGCCACGTCCCTCACGTACCACTCGGCAGAGGCGCGGGGAAACCTGGCGTACTGGCTGTGGCTTCTCTAGCGGGACTCGGCATGAGGCTGGCGCGGCTGCTTCGCGGAGCCGCCTTGGCCGGCCCGGGCCCGGGGCTGCGCGCCGCCGGCTTCAGCCGCAGCTTCAGCTCGGACTCGGGCTCCAGCCCGGCGTCCGAGCGCGGCGTTCCGGGCCAGGTGGACTTCTACGCGCGCTTCTCGCCGTCCCCGCTCTCCATGAAGCAGTTCCTGGACTTCGGATCAGTGAATGCTTGTGAAAAGACCTCATTTATGTTTCTGCGGCAAGAGTTGCCTGTC…
>STRG.9039.3
GGGGGCGGGGCCTCGCGGCCGGCGAGGGGCTGAGCTGACAGGGCCGCATCGGCTTACCCCACCTTACTTTATCGGAACGTGCCTAAGCTGCTGCAGCTGGCACCCGGTTGCGCTCGGCGAAGAGGGCTGGGGGCGGGAGATGACGGTGGTCTTCTCCCTGCTTGGCACCCTGCGAGCACCAGCTCCCTTCTCCTCGCCACTCCAAGGTTGCAGACGAAGCAGATGTGATTATAAAGACTTCAGTGGAATAATCGCAAGTTCCCATGTGAGATCTGGTTGGAGTTGGAGGGTGAGAGAAAATGAATTCTAATTTACCTGCAGAGAACTTAACCATTGCAGTCAATATGACCAAGACTTTGCCTACAGCAGTAACGCATGGATTTAATTCCACTAATGACC…
>STRG.9115.1
ATAGTAACCGCACCCATAACAGCCGTGGTGGTTATGGCTGGCCTGAGCGGCGCGCAGATCCCCGACGGGGAGTTCACCGCGGTCGTGTACCGCCTCATCCGCAATGCACGCTACGCCGAGGCGGTGCAGCTGCTGGGCGGAGAACTGCAGCGGAGCCCTAGGAGCCGCGCCGGCCTGTCGCTGCTAGGCTACTGCTACTACCGCCTGCAGGAGTTCGCGCTGGCGGCCGAGTGCTATGAGCAGCTGGGCCAGCTGCACCCGGAACTGGAGCAGTACCGCCTGTACCAGGCCCAGGCCCTGTACAAGGCCTGCCTTTATGCGGAGGCCACCCGGGTCGCCTTCCTTCTCCTGGATAACCCCGCCTACCACAGCCGGGTCCTCCGCCTGCAAGCTGCTATC…
>STRG.9171.2
GGAACTTGCTGACTGCGCGGCCGGGAGGAGCCGAGCCGGGCGGCGGCGGCGGGAGGCTACAGCGCGCGGGGGTCTCCCGCGTCCCCTCCGCCTCGCCGGGAGCTCGCGCCCTCGCCCAGCCGAGCTCCCACCCCCGCTTTTTTCCGAAGGCGCTGGGCGGCGCCACCCTCCGGCCGGAGCCCGGCACTGCACAACCCCCTCCGACTTTCAATGTTCCACACTCCCCGGCCAGAGCCTCCTCGGCTTCTTTTTTTCCCTCCCCCCCCTTCCCCCCCCCACAGCTGCCTCCATTTCCTTAAGGAAGGGTTTTTTTCTCTCTCCCTCCCCCACACCGTAGCGGCGCGCGAGCGGGCCGGGCGGGCGGCCGAGTTTTCCAAGAGATAACTTCACCAAGATGTC…
>STRG.9207.2
ACATTGCATCGCTGGGATAAACGGAGCTGGACGACTCAGTCTCTTGGTCTGTGGCTGCTGCGGTTACCTGGATGGGCGAGCACCTCTGAGGCTGGCTTTGTTACCTGGGCAATAAGGGACTAGCAGTTCAGCCGTTTTCTATGCCTGCTGGATTTGTTTGTATTTGTTCCCAGCCACTGCTCATGTAATGTACTCCCTTAACCAGGAAATTAAAGCATTCTCCCGGAATAATCTCAGGAAGCAATGCACCAGGGTGACAACGCTAACTGGAAAGAAAATTATAGAAACATGGAAAGATGCCAGAATTCATGTTGTGGAAGAAGTAGAGCCGAGCAGTGGGGGTGGTTGTGGTTATGTGCAGGACCTTAGCTCGGACCTGCAAGTTGGCGTTATTAAGCC…
>STRG.9239.1
GGCGGCGGCGGCGGCGGAGAGAGCTGGCTCAGGGCGTCCGCTAGGCTCGGACGACCTGCTGAGCCTCCCAAACCGCTTCCATAAGGCTTTGCCTTTCCAACTTCAGCTACAGTGTTAGCTAAGTTTGGAAAGAAGGAAAAAAGAAAATCCCTGGGCCCCTTTTCTTTTGTTCTTTGCCAAAGTCGTCGTTGTAGTCTTTTTGCCCAAGGCTGTTGTGTTTTTAGAGGTGCTATCTCCAGTTCCTTGCACTCCTGTTAACAAGCACCTCAGCGAGAGCAGCAGCAGCGATAGCAGCCGCAGAAGAGCCAGCGGGGTCGCCTAGTGTCATGACCAGGGCGGGAGATCACAACCGCCAGAGAGGATGCTGTGGATCCTTGGCCGACTACCTGACCTCTGCAA…
>STRG.9428.3
GCCGCCGCCGCCCGCGCGCCGCAGCCTGGAGGAGCCGCCGCCGCCGCCGCGGCCAAGCGAGCGCCGTCGGGGCGGGTGGGCGGGAAGAAGCGGCGGGCCCGAGGTGGGGGGGAGCAGAGAGAGCGCGCCCACCACCTTCCCTTCCCCCCTCGATGGGAGCGGGGGCGTCCCGGCTCCTGCAGCCGCCAGAGGAGGGAGAGCCGGGGGCCGTCGCTTCGGAGTTGGGGCTGAGCAGTCCTCGGGGAGAGCGCGCCAAGACCGCTGCAGCCGCTGGCTGACGGAAGGAGAGTTTTACATGGAAGTGGCTTACAGAAACTTGGCGCTGAGGTGCAGGGAAGCCAGAAACTCTTTGTGTCTCTAAGGCCGATGAGGAATTTGGAAACACATGTGGGACATACA…
>STRG.9396.1
AAACCGCGACTGCAAGCTTCGGTAGTCCTCTCCGCTGCTGTCGCCAGGAGTCACTTCACGAGAAGCCAGGTCACAACCGTCGGCCCTTGTCTGGAAAAGTAAAAGTGGATCCTGCCACGTTCGGAGCTCCCTGGCGCCTCGCCCGGCTGGAGCTAGAGAACTCGTCCTGTGGCGGCCCCCGGCGTGGGGCGGGACAGCGGCCCCCTGGAGGGGGCAGTCCCGGGAGAACCTGCGGCGGCCGGAGCGGTAAAAATAAGTGACTAAAGAAGCAGACCTGGGAATCACCTAACATGTCGAGGAGGAGATTTGATTGCCGAAGTATTTCAGGCCTACTAACTACAACTCCTCAAATTCCAATAAAAATGGAAAACTTTAATAATTTCTATATACTTACATCTA…
>STRG.9557.9
ATGTCTGCTGAAGTCATCCATCAGGTTGAAGAAGCACTTGATACAGATGAGAAGGAGATGCTGCTCTTTTTGTGCCGGGATGTTGCTATAGATGTGGTTCCACCTAATGTCAGGGACCTTCTGGATATTTTACGGGAAAGAGGTAAGCTGTCTGTCGGGGACTTGGCTGAACTGCTCTACAGAGTGAGGCGATTTGACCTGCTCAAACGTATCTTGAAGATGGACAGAAAAGCTGTGGAGACCCACCTGCTCAGGAACCCTCACCTTGTTTCGGACTATAGAGTGCTGATGGCAGAGATTGGTGAGGATTTGGATAAATCTGATGTGTCCTCATTAATTTTCCTCATGAAGGATTACATGGGCCGAGGCAAGATAAGCAAGGAGAAGAGTTTCTTGGAC…
>STRG.9729.1
GGGTTTCTGCAGAGTCTACTTCAGAAGCGGAGGCACTGGGAGTCCGGTTTGGGATTGCCAGGCTGTGGTTGTGAGTCTGAGCTTGTGAGCGGCTGTGGCGCCCCAACTCTTCGCCAGCATATCATCCCGGCAGGCGATAAACTACATTCAGTTGAGTCTGCAAGACTGGGAGGAACTGGGGTGATAAGAAATCTATTCACTGTCAAGGTTTATTGAAGTCAAAATGTCCAAAAAAATCAGTGGCGGTTCTGTGGTAGAGATGCAAGGAGATGAAATGACACGAATCATTTGGGAATTGATTAAAGAGAAACTCATTTTTCCCTACGTGGAATTGGATCTACATAGCTATGATTTAGGCATAGAGAATCGTGATGCCACCAACGACCAAGTCACCAAGGA…
>STRG.9745.3
GGTAAAATAGCCCTTCTGTTACTGTCCGGGGCTGCGGGGTGAGAGGCCAGGGCCGAGAAGGGCTTCAGGACGCGGGAGGCGCACTTGCTTCAAGTCGCGGGCGTGGGAACGGGGTTGCAAAACGGGGCCTCTTTGTCCGGGCTTGCTTCCGGCGTCATGGCTCAAAGGGCCTTCCCGAATCCTTATGCTGATTATAACAAATCCCTGGCCGAAGGCTACTTTGATGCTGCCGGGAGGCTGACTCCTGAGTTCTCACAACGCTTGACCAATAAGATTCGGGAGCTTCTTCAGCAAATGGAGAGAGGCCTGAAATCAGCAGACCCTCGGGATGGCACCGGTTACACTGGCTGGGCAGGTATTGCTGTGCTTTACTTACATCTTTATGATGTATTTGGGGAC…
>STRG.9801.1
GCCACATCCCGGCAGCCCTCCTACCTGCGCACGTGGTGCCGCCGCTGCTGCCTCCCGCTCGCCCTGAACCCAGTGCCTGCAGCCATGGCTCCCGGCCAGCTCGCCTTATTTAGTGTCTCTGACAAAACCGGCCTTGTGGAATTTGCAAGAAACCTGACCGCTCTTGGTTTGAATCTGGTCGCTTCCGGAGGGACTGCAAAAGCTCTCAGGGATGCTGGTCTGGCAGTCAGAGATGTCTCTGAGTTGACGGGATTTCCTGAAATGTTGGGGGGACGTGTGAAAACTTTGCATCCTGCAGTCCATGCTGGAATCCTAGCTCGTAATATTCCAGAAGATAATGCTGACATGGCCAGACTTGATTTCAATCTTATAAGAGTTGTTGCCTGCAATCTCTATCCC…
>STRG.9810.1
AAAACTCACGCCCCAAACAAAACGCAAGGAGAGGAGGGCGCGCGGCCTGCAGCCCTCGCCCGCGTCCCCGGCCGCGGCGTGATGCGCGCGGACCAGCCCGCGACGCCCGGGCTGCCGCTGTCCCCGCACCTGGACGCTGGCGCGGTGGCCGCGCCCCAGCCTCGATCGCTCGCCGCGGCGACTCGGCCCCAGGCTTCCGGCGCCGGTGGGGGCCCTCGCTCTCCATGGGGCTGAGGGACTGGCTGAGAACCGTGTGCTGCTGCTGCGGGTGCGAGTGCTTGGAGGAGCGCGCCCTGCCTGAGAAGGAGCCCCTCGTCAGTGATAACAATCCATATTCCTCATTTGGAGCAACTCTGGTGAGGGATGATGAGAAGAATTTATGGAGTATGCCCCATGATG…
>STRG.9902.2
GAGCCGGAGTCGGATGGCGGCTACGGCGGCTCATTGTTTTCCGCTGCAGGGGTGCTGAAGGGGGGACGCGGGTCGGACGCGTCCGGCTGTGGAAGAGAGCGGCGGCCGCTCACAACATGCACAGCCTGGCGACGGCTGCGCCTGTGCCTACTACACTGGCACAAGTGGATAGAGAAAAGATCTATCAGTGGATCAATGAGCTGTCCAGTCCTGAGACTAGGGAAAATGCTTTGCTGGAGCTAAGTAAGAAGCGAGAATCTGTTCCTGACCTTGCACCCATGCTGTGGCATTCATTTGGTACTATTGCAGCACTTTTACAGGAAATTGTAAATATTTATCCATCTATCAACCCACCCACCTTGACAGCACACCAGTCTAACAGAGTTTGCAATGCTCTGG…
>STRG.54728.1
GCTGTTGGTCCACGCCGCCCGTCGCGCCGCCCGCCCGCTCAGCGTCCGCCGCCGCCATGGGAGTGCAGGTGGAAACCATCTCCCCAGGAGACGGGCGCACCTTCCCCAAGCGCGGCCAGACCTGCGTGGTGCACTACACCGGGATGCTTGAAGATGGAAAGAAATTTGATTCCTCCCGGGACAGAAACAAGCCCTTTAAGTTTATGCTAGGCAAGCAGGAGGTGATCCGAGGCTGGGAAGAAGGGGTTGCCCAGATGAGTGTGGGTCAGAGAGCCAAACTGACTATATCTCCAGATTATGCCTATGGTGCCACTGGGCACCCAGGCATCATCCCACCACATGCCACTCTCGTCTTCGATGTGGAGCTTCTAAAACTGGAATGACAGGAATGGCCTCCTC…
>STRG.54748.1
AACTCCAGGGCTAGTGAGCTGGACCGGAAGTAGGTTTCTACCCGACCGCATTTTACGTGGTGCTGCATTTCCGGTAGCGGCGGCGGGAAATCGGCTGTGGGAGAGAGGCTAGGCCTCTGAGGAGGCGAATCCGGCGGGTATCAGAGCCATCAGAACCGCCACCATGACGGTGGGCAAGAGCAGCAAGATGCTGCAGCATATTGATTACAGGATGAGGTGCATCCTGCAGGACGGCCGGATCTTCATTGGCACCTTCAAGGCTTTTGACAAGCACATGAATTTGATCCTCTGTGACTGTGATGAGTTCAGAAAGATCAAGCCAAAGAACTCCAAACAAGCAGAAAGGGAAGAGAAGCGAGTCCTCGGTCTGGTGCTGCTGCGAGGGGAGAATCTGGTCTC…
>STRG.54776.3
GCTGTGAGGCTCGGAGTCGCCGGAGGAGCCAGTATCTGTGTCGCCGCCGCCCGCGGCGTCCCCGGTTTGGTGTTGCGGCGCCCACCTTCGGGAGGATCAGTATCTGGCACCAATTCTGACCCAGTCATTTGTGATCCCTGGCTCTTGTGATATGCTGAAGATTTCCAGGCAGTTTTTGTGGAACACCTCCCCGTCCAGCTCTAATCAAGCACCATATAAACAAGAAATTGCCTGGTCAAATCTGTGAGGACTGTATTCTGACTGCCAAAGAGATCAATACTGACACCAGAATGGCAGCTACTCTCAAGTCATTAAAACTTGTAAGATACCGAGCATTTTGCAGTCCTTCTGCCTTTGGTGCAGTCCGAAGTGTGTCATACTGGAATGTGAGCAGCACAC…
>STRG.54800.1
CCCTTCCTCGTGCTCGGCGTTGAGCTCCTGCAGCCGCCGCCGCTGCAGTGGTCGTCCCTGCCCTCCCCGGCCCCGGGGTGCACCCCGCAAGGCTCCCGCTGGTGTCCCTGGAGCATGGGAGGCTGCTGAGCGTGAGTGGCGGTGTCTGGCAGGAGCTGCGTGGCAGGGAGGGCGTCCATGGCTGCAGCCAACAAGGGCAACAAGCCCAGAGTCCGGAGTATCCGCTTTGCGGCAGGCCACGATGCAGAAGGATCCCACAGCCACGTCCACTTTGATGAGAAGCTGCATGACTCGGTGGTCATGGTCACCCAGGAGAGTGACAGCAGCTTTCTGGTCAAGGTTGGCTTCCTGAAGATCCTGCACAGGTATGAGATTACCTTCACTCTGCCCCCAGTGCAC…
>STRG.54822.2
ACACAGGCCGCGGCGGCTGGCTCGGGCCCCTACGGTCCCGGCGGCGGCTGGAGGAGGAAGCCAGGCGGCTGGCGGAGGAGGAGAGACGGAGGAGGCCGAGACCGGAGCGCCGCTCGCCGCAGACTTACTTCCCCGGCTCAGCAGGGAAAGGTTCCTAGAAGGTGAGCGCGGACGGTATGCAAAGTTGTGAATCCAGTGGTGACAGTGCGGATGACCCTCTCAGTCGCGGCCTACGGAGAAGGGGACAGCCTCGTGTGGTGGTGATCGGCGCCGGCTTGGCTGGCCTGGCTGCAGCCAAAGCACTTCTTGAGCAGGGTTTCACGGATGTCACTGTGCTTGAGGCTTCCAGCCACATCGGAGGCCGTGTGCAGAGTGTGAAACTTGGACACGCCACCTTTG…
>STRG.54864.7
AGTATGGAGGCAGCGGTAGCCCAGTGTCTGAGTGGTTGCCGGGTCTCCATGGAGAAGCGGCTCGCCAGTGTCCCAGGCTGCTGAGCTCTCGCCGCCCGAGACCCCGCGGCGCGGCCGCAGGGCCATGCTAGCCTTGCGCGTGGCGCGCGGCTCGTGGGGGGCCCTGCGCGGCGCCGCTTGGGCTCCGGGAACGCGGCCGAGTAAGCGACGCGCCTGCTGGGCCCTGCTGCCGCCCGTGCCCTGCTGCTTGGGCTGCCTGGCCGAACGCTGGAGGCTGCGTCCGGCCGCTCTTGGCTTGCGGCTGCCCGGGATCGGCCAGCGGAACCACTGTTCGGGCGCGGGGAAGGCGGCTCCCAGGCCAGCGGCCGGAGCGGGCGCCGCTGCCGAAGCCCCGGGCGG…
>STRG.54917.1
ATTGCGCATGCCCCGTATCCAAGGCCGCCTCCGGGAGCACCTCCCATGCCGCTCCGCTCCCTCCCGGTGACCGGGCACGCGCGCTCGCTCCCGCAGAGCGTGCCCTGCGTGCGGGTGCCCGCCGAGCCCGCCGGGCGCTGGATCTCCGAGTGCCCCGGCCGGGGCCTGAGGAGCGGGCACAGGGCAAGGCGGCGGACGGCTGCGTCGCCCGAGGCGAGGAGGAGCGCTGGCGAGACGGTAAAGAACAGGTCCAAGAAAAGCTCAAAGAAAGCAAATACCAGCAGCAGCAGTAGCAACAGCAGCAAGTTGCCACCAGTTTGTTATGAAATAATTACCTTGAAGACTAAAAAGAAGAAGATGGCTGCTGATATATTCCCCCGTAAAAAGCCAGCCAACTCC…
>STRG.54917.2
AGAGCGTGCCCTGCGTGCGGGTGCCCGCCGAGCCCGCCGGGCGCTGGATCTCCGAGTGCCCCGGCCGGGGCCTGAGGAGCGGGCACAGGGCAAGGCGGCGGACGGCTGCGTCGCCCGAGGCGAGGAGGAGCGCTGGCGGTGTCACTGTTTTGCTTGGTCCAATCATGATTGGTGACTTCAGCTATTGGCTCGGAGCACTGGCTGTCTGACTCCATCTGCAGGGCTGTAATACCTACTCTCCTCCGATCCATTCACCACACAACTTCAGCCGGCTGAACAGACTCACGCAGCTCCAGCCCATCTTGCTGACCTAATTCAGAAAAGAAGTGCTACAGCTCTGTGCCTGTCATCTTTGCAGTGTAGCATTTTCAGAGACGGTAAAGAACAGGTCCAAGAAAA…
>STRG.54998.2
GGCCTCCGCCAACGCGCCACCAGTTAGAGGCAGGGAGTACCTCTCCGAGCGGAAGGGCCGGCGTCTCCGAAGCGCGGGAGCCTCCAAATCGCGCCCTTCTGCTCTCACGAGATCTGGTGACGTCAGCGCTCGCTGCCATCTTGGACTCGGGCTGAGTAATAAATTCCCCCCGCACCGAAACGCGGTCTTTCTCTAGACGCGTCTTGCTGGGAGAGTGTCCGTTGCTTCCCGTCCGTGTCGCGGCCCTGCGGTTGGCGGCCTCCTCGTGGAGCGGAGCAAGGCCAGGCGGCCCCTGCTCGAGTCCCGCGTCGCCATGGCCGCGGTTCCCGAGTTGCTGCAGCAGCAGGAGGAGGACCGCAGCAAGCTGAGATCTGTATCTGTGGACCTGAATGTTGATCC…
>STRG.55018.1
AACCAGTGCAGCTCCCTGTTCCGCGAGCATACGTCATCGTTCTCGCTTTCCGGTAGCTAAGGCGATCAGCGGGACTTCCCACTGAGACGAGCGGATGTCATATTGTATCAGGGCGAACCTCTGAGGAGCGCTGGCTGCGCTTAGGCAACGGTGCGGCAGGCGCCGGGGTTTTCTGAAACAGAAACGTTTAGGGGTGGGGAAACGTGTTCCGAGGAACTCTCGTTTTGAAGTGCGACATACACCTGTCTTGCCCTGTTCCAAGATGGTGGCAGAGCTTCTCTGAGTCTCTCGCTTCCTCCAGTCCGTCGGAGAAGCGCTCTTTGATTGGCCAGTGGACAGCGCCGTGGCATGACGCGCTGGGGCGCTGGCCAATCGGTTGAGAGCTGAGCTGGACTTGGC…
>STRG.55094.2
ACGGCCTCGCCTCGGTATCGCAGCGGGTCCTCTCTATCTAGCTCCAGCCTCTCGCCTGCGCCCCACTCCCCGCGTCCCGCGTCCTAGCCGACCATGGCCGGGCCCCTGCGCGCCCCGCTGCTCCTGCTGGCCATCCTGGCCGTGGCCCTGGCCGTGAGCCCCGCGGCCGGCTCCAGTCCCGGCAAGCCGCCGCGCCTAGTGGGAGGCCCCATGGACGCCAGCGTGGAGGAGGAGGGTGTGCGGCGTGCACTGGACTTTGCCGTCGGCGAGTACAACAAAGCCAGCAACGACATGTACCACAGCCGCGCGCTGCAGGTGGTGCGCGCCCGCAAGCAGATCGTAGCTGGGGTGAACTACTTCTTGGACGTGGAGCTGGGCCGAACCACGTGTACCAAGACC…
>STRG.55120.2
GTTCGGCGCCAAAGCGCGGAGCGGAGGCCGAGGCGAGAGCCTGGCGCTGTAGGACTAGAACGAAAGGAGTGAGGCGCCGAGAGCCCAGATACCATTTTGGCGTGAGAGCTGGTGGTTGGCAAGGCCGCGGGAGTGGGAAGCGTCCGCCATGTTCTGCGAAAAAGCCATGGAACTGATCCGCGAGCTGCATCGCGCGCCCGAAGGGCAACTGCCTGCCTTCAACGAGGATGGACTCAGACAAGTTCTGGAGGAGATGAAAGCTTTGTATGAACAAAACCAGTCTGATGTGAATGAAGCAAAGTCAGGTGGACGAAGTGATTTGATACCAACTATCAAATTTCGACACTGTTCTCTGTTAAGAAATCGACGCTGCACTGTAGCATACCTGTATGACCGCTT…
>STRG.55260.1
GGTGGCAGCGGCAGCGGAGGAGGAAGCTGAGCAGGGCGGCGGCGGCGGTGGAACCTGCGGGGCTGGGGCGCGCGCCATGGGCCGCCTGCACTGCACTGAGGACCCGGTGCCGGAGGCCGTGGGCGGCGACATGCAGCAGCTGAACCAGCTGGGCGCGCAGCAGTTCTCAGCCCTGACAGAGGTGCTTTTCCACTTCCTAACTGAGCCAAAAGAGGTGGAAAGATTTCTGGCTCAGCTCTCTGAATTTGCCACCACCAATCAGATCAGTCTTGGCTCCCTCAGAAGCATCGTGAAAAGCCTCCTTCTGGTTCCAAATGGTGCTTTGAAGAAGAGTCTCACAGCCAAGCAGGTCCAGGCGGATTTCATAACTCTGGGTCTTAGTGAGGAGAAAGCCACTTA…
>STRG.55199.1
AGAGCTCCTCCCCCAGCGGCCGGGGTAGGGTGGCGGCTGGCCCAGCCGGGCCCCCGCTGCCCTCTGCCCTGGGCGCTTGGTCGGAGCGGGCTGGGCAAAGCGGGACAGGGCGAGCGCGGCGGCCCGGGGGCTCGGAGGCGAAGATGGCGTCCGGCAGGCGCGCCCCGCGCACCGGGCTGCTGGAGCTGCGCGCCGGGGCGGGCTCGGGGGCCGGCGGCGAGCGATGGCAGCGGGTGCTGCTGAGTCTGGCGGAGGACGTGCTGACCGTGAGCCCCGCCGACGGCGACCCTGGTCCCGAGCCCGGCGCTCCGCGGGAGCAGGAGCCCGCGCAGCTCAACGGCGCCGCGGAGCCGGGCGCCGGGCCCCCGCAGCTGCCAGAGGCGCTACTGCTCCAGCGGC…
>STRG.55306.1
GAGCCCGCGCGTCGGCGCCGGCGCCAAGGGGCGGCCTCTAGCCACACCGAGTCCGCCGCGGCGTCCAGGGTCGGCAGCAACCGCAGCCGAGCCCGAGCGGGTGGCGGCGCCATGGCGTGCGCGGGGCTGCTCACCGTGTGCCTGCTCCGGCCGCCCGCGCCCCAGCCCCAGCCCCAGACCCCGCGGCACCCCCAGCTCGCGCCCGACCCGGGGCCCGCCGGACACACGCTCTTCCAGGACGTTTTCCGCAGAGCAGACAAGAATGATGATGGGAAGCTCTCATTTGAGGAATTCCAGAATTACTTTGCCGATGGGGTTCTCAGCCTGGGGGAGCTGCAGGAACTGTTCAGCGGCATTGATGGGCATCTCACCGACAATTTAGAAACAGAAAAACTGTGT…
>STRG.55330.3
CCCTGCTCGGCGCTGCCCGCCCAGTTCCTGTTCCCAGACTGAGGCCCAGCCCCCTTCGCCCGTTTCCATCACGAGTGCCGCCAGCATGTCTGACAAACTGCCCTACAAAGTCGCCGACATCGGCCTGGCTGCCTGGGGACGCAAGGCCCTGGACATTGCTGAGAACGAGATGCCGGGCCTGATGCGTATGCGGGAGCGGTACTCGGCCTCCAAGCCACTGAAGGGCGCCCGCATCGCTGGCTGCCTGCACATGACCGTGGAGACGGCCGTCCTCATTGAGACCCTCGTCACCCTGGGTGCTGAGGTGCAGTGGTCCAGCTGCAACATCTTCTCCACCCAGGACCATGCGGCGGCTGCCATTGCCAAGGCTGGCATTCCGGTGTATGCCTGGAAGGGCGA…
>STRG.55336.8
AAGTGTTCGCTACGCGGGGCTACCGGATCGGTCGGAAATGGCAGAGGTGGAGGAGACACTGAAGCGACTGCAGAGCCAGAAGGGAGTGCAGGGAATCATCGTCGTGAACACAGAAGGCATTCCCATCAAGAGCACCATGGACAACCCCACCACCACCCAGTATGCCAGCCTCATGCACAGCTTCATCCTGAAGGCACGGAGCACCGTGCGTGACATCGACCCCCAGAACGATCTCACCTTCCTTCGAATTCGCTCCAAGAAAAATGAAATTATGGTTGCACCAGATAAAGACTATTTCCTGATTGTGATTCAGAATCCAACCGAATAAGCCACTCTCTTGGCTCCCTGTGTCATTCCTTAATTTAATGCCCCCCAAGAATGTTAATGTCAATCATGTCA…
>STRG.55352.2
GCAAAGGCGGCCGCGGTTCTAGGAACTTGACGTGATGGGGCTTCCTGAGGAGCGGGTCCGGAGCGGCAGCGGGAGCCGGGGCCAGGAGGAAGCTGGAGCCGGAGGCCGGGCGCGGAGTTGGTCTCCGCCGCCCGAGGTCAGCCGCTCCGCGCACGTCCCCTCGCTGCAGCGCTACCGCGAGCTGCACCGGCGCTCCGTGGAGGAGCCGCGGGAATTCTGGGGAGACATTGCCAAGGAATTTTACTGGAAGACTCCATGCCCTGGCCCATTCCTTCGGTACAACTTTGATGTGACTAAAGGGAAAATCTTCATTGAGTGGATGAAAGGAGCAACTACCAACATCTGCTACAATGTACTGGATCGAAATGTCCATGAGAAAAAGCTTGGAGATAAAGTTGC…
>STRG.55362.1
GCTTCCTGTTTGTCCGACGAGGAGACATGGCGGCGGCGCCGGTAGCGGCTGGGTCTGGAGCCGGCCGAGGGAGACGGTCGGCAGCCACAGTGGCGGCTTGGGGCGGATGGGGCGGCCGGCCGCGGCCTGGTAACATTCTGCTGCAGCTGCGGCAGGGCCAGCTGACCGGCCGGGGCCTGGTCCGGGCGGTGCAGTTCACTGAGACTTTTTTGACGGAGAGGGACAAACAATCCAAGTGGAGTGGAATTCCTCAGCTGCTCCTCAAGCTGCACACCACCAGCCACCTCCACAGTGACTTTGTTGAGTGTCAAAACATCCTCAAGGAAATTTCTCCTCTTCTCTCCATGGAGGCTATGGCATTTGTTACTGAAGAGAGGAAACTTACCCAAGAAACCACTT…
>STRG.55380.9
AGTCCAAGGTACAGTCGCCGCGTGCGGAGCTTGTTACTGGTTACTTGGCCTCATGGCGGTCCGAGCTTCGTTCGAGAACAACTGTGAGATCGGCTGCTTTGCCAAGCTCACCAACACCTACTGTCTGGTAGCGATCGGAGGCTCAGAGAACTTCTACAGTGTGTTCGAGGGCGAGCTCTCCGATACCATCCCCGTGGTGCACGCGTCTATCGCCGGCTGCCGCATCATCGGGCGCATGTGTGTGGGGAACAGGCACGGTCTCCTGGTACCCAACAATACCACCGACCAGGAGCTGCAACACATTCGCAACAGCCTCCCAGACACAGTGCAGATTAGGCGGGTGGAGGAGCGGCTCTCAGCCTTGGGCAATGTCACCACCTGCAATGACTACGTGGCCTT…
>STRG.55389.2
CCCCTTTCCGGCCGGTCCCCATGGAGGCGCTGGGGAAGCTGAAGCAGTTCGATGCCTACCCCAAGACTTTGGAGGACTTCCGGGTCAAGACCTGCGGGGGCGCCACCGTGACCATTGTCAGTGGCCTTCTCATGCTGCTACTGTTCCTGTCCGAGCTGCAGTATTACCTCACCACGGAGGTGCATCCTGAGCTCTACGTGGACAAGTCGCGGGGAGATAAACTGAAGATCAACATCGATGTACTTTTTCCGCACATGCCTTGTGCCTATCTGAGTATTGATGCCATGGATGTGGCCGGAGAACAGCAGCTGGATGTGGAACACAACCTGTTCAAGCAACGACTAGATAAAGATGGCATCCCCGTGAGCTCAGAGGCTGAGCGGCATGAGCTTGGGAAAG…
>STRG.55416.4
GCTGTACCGGAACGTGGGGCGAGGCGCTGTTCATCAAAGAAAAAGGGTTCTTTTGGTCACCCACCACTGGCCCCATGGCTGCCGTGCAGATGGATCCTGAGCTAGCCAAGCGCCTCTTCTTTGAAGGGGCCACTGTGGTCATCCTGAACATGCCCAAGGGAACAGAGTTTGGGATTGACTATAACTCCTGGGAGGTCGGGCCCAAGTTCCGGGGCGTGAAGATGATCCCTCCAGGCATCCACTTCCTCCACTACAGCTCTGTGGACAAGGCTAATCCGAAGGAAGTAGGCCCTCGTATGGGTTTCTTCCTTAGCCTGCACCAGCGGGGGCTGACAGTGCTGCGCTGGAGCACACTCAGGGAAGAGGTAGACCTGTCCCCAGCCCCAGAGTCTGAGGTGG…
>STRG.55462.3
GGACTCCGGCGGGACCTGCTCGGAGGAATGGCGCCGCCGGGTTCAAGCACTGTCTTCCTGTTGGCCCTGACAATCATAGCCAGCACCTGGGCTCTGACGCCCACTCACTACCTCACCAAGCATGACGTGGAGAGACTAAAAGCCTCGCTGGATCGCCCTTTCACAAATTTGGAATCTGCCTTCTACTCCATCGTGGGACTCAGCAGCCTTGGTGCTCAGGTGCCAGATGCAAAGAAAGCATGTACCTACATCAGATCTAACCTTGATCCCAGCAATGTGGATTCCCTCTTCTACGCTGCCCAGGCCAGCCAGGCCCTCTCAGGATGTGAGATCTCTATTTCAAATGAGACCAAAGATCTGCTTCTGGCAGCTGTCAGTGAGGACTCATCTGTTACCCAG…
>STRG.55288.1
ACCTGTATTCGAAAGTGATCGTGGGCTGCCTGTGCCCTGGTCATTGATAGTGCAGGGAGAGAAATCGCGGAAAGTGCTTCCCCGTGTTTGGAGGGTCCGCTCCTGTCCCTTTCAAACTCTGGAGCTTTCTCACA
>STRG.55474.1
[truncated: 943 more rows]

## Sheet: coaggregated ctrls (length)
>STRG.60767.4
[truncated: 2,175 more rows]

## Sheet: coaggregated ctrls (abundance)
>STRG.60840.9
[truncated: 2,175 more rows]
