# Supplementary material
Source: Research Square preprint supplement (doi:10.21203/rs.3.rs-9032720/v1)
Supplement: Supplementary file 2 [file 9e9779b974fd1eceaa33bdbb.docx]

|  | **Phosphatase (pNPP)** | | **Esterase (pNPA)** | |
| --- | --- | --- | --- | --- |
|  | Present work | Horvath et al. | Present work | Horvath et al. |
| **KM / mM** | 1.07 ± 0.72 | 0.5 ± 0.13 | 1.54 ± 0.44 | 4.3 ± 2.5 |
| **kcat / s⁻¹** | 0.9×10⁻⁵ ± 0.5×10⁻⁵ | 30×10⁻⁵ ± 10×10⁻⁵ | 0.005 ± 0.002 | 0.012 ± 0.003 |
| **ε / M⁻¹ s⁻¹** | 0.01 ± 0.006 | 0.6 | 3.2 ± 0.6 | 2.9 |
